# Supplementary material for: DBSCAN-SWA: An Integrated Tool for Rapid Prophage Detection and Annotation
Source: Front Genet. 2022 Apr 19;13:885048. doi: 10.3389/fgene.2022.885048 (PMC9061938; doi:10.3389/fgene.2022.885048)
Supplement: Supplementary file 1 [file Table1.XLS]

## Sheet: Table S1
Supplementary Table S1. Three defined prophage related features and Criteria When predicting the interaction between a bacterium-phage pair by prophage signal, DBSCAN-SWA will evaluate the similarity between the integrated prophage(s) and the phage genome(s) based on homologous proteins alignment and nucleotides alignment with BLAST and By calculating the following three prophage related features…
Features	Feature Definitions	Criteria
1.PROPphp	PROPphp is the percentage of shared homologous proteins of prophage between the phage and the prophage region based on blastP homologous protein sequences search.	Blastn:identity>=0.7,
2.PROPidn 3.PROPcov	PROPidn and PROPcov are defined as the best values of average identity and accumulated coverage over all blastN hits between the host prophage regions and the phage nucleotide sequences, respectively.	Coverage of prophage >= 0.3
		Blastp:homolgy protein percent of prophage>=0.3

## Sheet: Table S2
Supplenmentary Table S2. Comparative analysis for degree of matching between DBSCAN with othter prophage detection tools and reference coordinates in literature.
In this table are 50 genomes used to test the accuracy of the method for predicting the prophages in PHIS Detector. Each genome appears with its accession number in the NCBI as well as regions(coordinate) of prophages present in this genome according to the literature. Each genome was submitted to the prophages identification software including DBSCAN-SWA,PHASTER, PhageFinder, and Virsorter. The …
Bacteria_ID	Bacteria_Def	Genomse Size	Reference_Coordinates	DBSCAN-SWA_fasta_flag	DBSCAN-SWA_region_fasta	DBSCAN-SWA_genbank_flag	DBSCAN-SWA_region_GenBank	PHASTER flag(fasta)	PHASTER Region(fasta)	PHASTER flag(GenBank)	PHASTER Region(GenBank)	phage_finder_flag	phage_finder_region	VirSorter_flag	VirSorter_Region
NC_000907	Haemophilus influenzae Rd KW20	1830138	1499076-1513073	2	1499075-1513073	2	1499075-1513073	2	1495049-1513250	2	1495049-1513073	2	1499076-1529727	2	1474302-1513100
NC_000907	Haemophilus influenzae Rd KW20	1830138	1559962-1594275	2	1558773-1597183	2	1558773-1597183	2	1558774-1597183	2	1558774-1597183	2	1558774-1602497	2	1541522-1608579
NC_000913	Escherichia coli str. K-12 substr. MG1655	4639675	1631063-1650732	2	1629452-1660495	1	1629452-1648663	1	1627517-1644304	2	1619557-1656744	0	NA	1	1633023-1655361
NC_000913	Escherichia coli str. K-12 substr. MG1655	4639675	1196090-1210402	1	1199678-1214059	1	1199678-1212003	1	1198640-1216671	1	1196867-1216671	0	NA	1	1199630-1232505
NC_000913	Escherichia coli str. K-12 substr. MG1655	4639675	2754181-2775804	0	NA	0	NA	0	NA	1	2754896-2777782	0	NA	1	2756110-2808633
NC_000913	Escherichia coli str. K-12 substr. MG1655	4639675	564038-584856	1	564814-582097	1	514855-581379	1	564755-586057	1	564755-586057	1	565978-581379	0	NA
NC_000913	Escherichia coli str. K-12 substr. MG1655	4639675	1410024-1432281	2	1406562-1436893	2	1406562-1436893	1	1411899-1434959	2	1395952-1435051	0	NA	0	NA
NC_000913	Escherichia coli str. K-12 substr. MG1655	4639675	262552-296320	2	247636-331496	2	247636-315590	0	NA	1	262898-297206	0	NA	0	NA
NC_000913	Escherichia coli str. K-12 substr. MG1655	4639675	2464567-2475651	1	2465300-2476510	1	2465300-2476510	1	2465301-2477629	1	2465301-2477629	0	NA	0	NA
NC_000913	Escherichia coli str. K-12 substr. MG1655	4639675	2064329-2076158	0	NA	0	NA	0	NA	0	NA	0	NA	0	NA
NC_000913	Escherichia coli str. K-12 substr. MG1655	4639675	2556793-2563354	0	NA	0	NA	0	NA	0	NA	0	NA	0	NA
NC_000962	Mycobacterium tuberculosis H37Rv	4411532	2970551-2981576	1	2970550-2976419	0	NA	1	2970063-2980833	2	2970063-2983874	1	2969989-2980998	2	2970074-2982137
NC_000962	Mycobacterium tuberculosis H37Rv	4411532	1780643-1788505	0	NA	0	NA	1	1766987-1788115	2	1766987-1788505	2	1777859-1788505	0	NA
NC_000964	Bacillus subtilis subsp. subtilis str. 168	4214630	2666111-2700582	1	2661101-2699243	1	2661101-2699243	2	2653062-2701098	2	2653062-2701098	1	2660574-2699243	2	2648854-2707735
NC_000964	Bacillus subtilis subsp. subtilis str. 168	4214630	1320640-1347494	2	1314452-1348182	2	1314452-1348182	2	1314453-1348182	2	1314453-1348182	2	1314453-1348182	1	1321280-1404543
NC_000964	Bacillus subtilis subsp. subtilis str. 168	4214630	2151284-2285604	1	2151625-2287053	1	2152085-2286408	1	2151626-2288090	2	2146013-2288062	1	2152086-2286408	1	2175547-2269514
NC_000964	Bacillus subtilis subsp. subtilis str. 168	4214630	2055488-2064044	1	2059690-2065377	1	2059690-2065377	0	NA	1	2055868-2065377	0	NA	0	NA
NC_001263	Deinococcus radiodurans R1	2648638	518499-547679	0	NA	0	NA	0	NA	0	NA	0	NA	1	518450-535811
NC_001263	Deinococcus radiodurans R1	2648638	71920-118141	0	NA	0	NA	0	NA	0	NA	0	NA	0	NA
NC_002179	Chlamydophila pneumoniae AR39	1229853	201-10839	0	NA	0	NA	0	NA	0	NA	0	NA	0	NA
NC_002488	Xylella fastidiosa 9a5c	2679306	489619-530138	1	497038-509918	1	497038-509918	1	486956-528481	1	506050-523687	2	486365-530642	2	479521-533916
NC_002488	Xylella fastidiosa 9a5c	2679306	2361812-2404268	2	2361811-2404268	2	2361084-2404268	1	2361812-2388777	1	2348689-2388777	1	2360850-2400303	2	2361120-2404918
NC_002488	Xylella fastidiosa 9a5c	2679306	1514347-1541075	1	1510852-1540790	1	1515382-1520428,1523485-1543928	2	1514344-1557570	2	1514344-1557570	1	1515650-1540790	2	1514298-1543979
NC_002488	Xylella fastidiosa 9a5c	2679306	1585980-1631056	1	1585979-1630508	1	1585979-1604794,1607851-1630508	2	1585873-1640907	2	1585873-1640907	1	1620323-1585592	2	1585931-1632731
NC_002488	Xylella fastidiosa 9a5c	2679306	649115-690375	1	650440-696070	1	650440-735957	2	647699-697033	2	647732-697033	1	652092-700739	2	648642-690426
NC_002488	Xylella fastidiosa 9a5c	2679306	2008224-2022372	1	2006147-2017514	1	2006147-2014835	2	2006087-2024354	2	2006087-2024354	1	2008994-2020365	0	NA
NC_002488	Xylella fastidiosa 9a5c	2679306	2177071-2183135	2	2170953-2184206	2	2170953-2183135	2	2170954-2199787	2	2157002-2184206	0	NA	0	NA
NC_002516	Pseudomonas aeruginosa PAO1	6264404	689236-702529	2	673190-705966	2	673190-705966	1	670089-701381	2	670089-703058	2	672777-711180	2	673142-703109
NC_002516	Pseudomonas aeruginosa PAO1	6264404	672777-689221	1	673190-705966	1	673190-705966	2	670089-701381	2	670089-703058	2	672777-711180	1	673142-703109
NC_002662	Lactococcus lactis subsp. Lactis Il1403	2365589	502723-513742	2	502337-520485	2	502337-520485	2	502338-517610	2	502338-520485	2	448369-533381	2	450372-517365
NC_002662	Lactococcus lactis subsp. Lactis Il1403	2365589	1036642-1071558	2	1022027-1075411	1	1022027-1070479	2	1033815-1077531	2	1033815-1079173	2	1032978-1094098	2	1029290-1080408
NC_002662	Lactococcus lactis subsp. Lactis Il1403	2365589	35516-49727	2	35515-49727	2	35515-94142	2	28459-56369	2	28459-56369	1	35839-55047	2	10231-95363
NC_002662	Lactococcus lactis subsp. Lactis Il1403	2365589	1414112-1456949	1	1416047-1460426	2	1395696-1460426	2	1414112-1457044	2	1414112-1457044	1	1457116-1415289	2	1414063-1460477
NC_002662	Lactococcus lactis subsp. Lactis Il1403	2365589	2013685-2025635	2	2011425-2028705	2	2011425-2028705	2	1997699-2028023	2	1997699-2028023	0	NA	2	2011377-2025686
NC_002662	Lactococcus lactis subsp. Lactis Il1403	2365589	447236-483244	2	447235-483244	2	447235-483552	2	447143-484064	2	447143-484064	1	448369-533381	1	450372-517365
NC_002663	Pasteurella multocida Pm70	2257487	1994906-2006460	0	NA	0	NA	0	NA	0	NA	0	NA	0	NA
NC_002678	Mesorhizobium loti MAFF303099	7036071	6975631-7011591	1	6975630-7006652	1	6958619-7006652	1	6975231-7011108	1	6975231-7011108	2	6975457-7020723	0	NA
NC_002678	Mesorhizobium loti MAFF303099	7036071	6587513-6595756	0	NA	0	NA	1	6592538-6608727	1	6592538-6608727	2	6575131-6629248	0	NA
NC_002678	Mesorhizobium loti MAFF303099	7036071	313639-359457	1	323684-332449	1	323684-332449	1	321147-347654	1	321147-347654	0	NA	0	NA
NC_002737	Streptococcus pyogenes M1 GAS	1852441	1192854-1222549	2	1186915-1225245	2	1186915-1225245	2	1182568-1222912	2	1182568-1222912	2	1222858-1183947	2	1190751-1222958
NC_002737	Streptococcus pyogenes M1 GAS	1852441	778642-820599	1	775794-819857	1	775794-819857	2	775802-821679	2	775802-821679	2	778519-821004	1	775746-819908
NC_002737	Streptococcus pyogenes M1 GAS	1852441	527569-571887	1	524917-569283	1	524917-569283	1	526682-570494	1	526682-570494	1	529334-582691	1	529578-568559
NC_002737	Streptococcus pyogenes M1 GAS	1852441	1773458-1782822	2	1771371-1789567	2	1771371-1789567	0	NA	2	1773437-1786762	0	NA	0	NA
NC_002745	Staphylococcus aureus subsp. aureus N315	2814816	2005924-2049520	2	2005148-2052732	2	2005148-2074317	2	2005721-2052732	2	2005721-2052732	2	2003333-2074317	2	2005103-2069614
NC_002758	Staphylococcus aureus subsp. aureus Mu50	2878529	2083515-2126110	1	2084316-2129322	2	2082903-2150747	2	2082980-2129322	2	2069951-2129411	2	2083515-2150747	2	2082855-2146044
NC_002758	Staphylococcus aureus subsp. aureus Mu50	2878529	917507-962565	1	914195-960196	1	914186-960196	1	910703-961979	1	910703-961979	1	917414-961983	1	917458-961636
NC_002935	Corynebacterium diphtheriae NCTC 13129	2488635	1866723-1880855	1	1869507-1880855	1	1868834-1880855	1	1863158-1880771	2	1863158-1880855	2	1866360-1881023	2	1866316-1881559
NC_002935	Corynebacterium diphtheriae NCTC 13129	2488635	154365-190992	1	155599-190661	1	155599-190661	1	151930-190741	1	151930-190741	1	155526-190083	2	154316-209804
NC_002935	Corynebacterium diphtheriae NCTC 13129	2488635	776521-790960	0	NA	0	NA	0	NA	0	NA	0	NA	2	776344-796132
NC_002935	Corynebacterium diphtheriae NCTC 13129	2488635	2216802-2297805	0	NA	0	NA	0	NA	0	NA	0	NA	0	NA
NC_002947	Pseudomonas putida KT2440	6181863	2586633-2625819	1	2584639-2611049	2	2584639-2625822	1	2586645-2608847	0	NA	2	2586040-2626085	2	2584591-2626736
NC_002947	Pseudomonas putida KT2440	6181863	3418567-3447235	1	3421842-3447795	1	3419452-3447795	1	3426049-3447235	2	3411566-3447568	2	3412991-3447795	2	3401368-3451023
NC_002947	Pseudomonas putida KT2440	6181863	4372649-4427414	1	4375035-4378712,4383050-4428765	1	4375035-4378712,4383050-4538198	1	4375283-4412410	1	4375283-4415646	2	4427565-4371608	2	4371013-4427467
NC_002947	Pseudomonas putida KT2440	6181863	1738082-1774805	2	1735317-1777266	2	1733982-1777266	1	1748035-1781069	2	1734863-1780106	2	1777435-1737987	1	1739400-1777908
NC_002967	Treponema denticola ATCC 35405	2843201	1169950-1202411	1	1182957-1193491	1	1182957-1244005	1	1175279-1214754	1	1175279-1214754	2	1202635-1164700	2	1164794-1205292
NC_002978	Wolbachia endosymbiont of Drosophila melanogaster	1267782	551654-558625	2	549453-587732	2	483194-636325	2	548107-573485	1	548107-556883	2	542719-616980	2	538372-633930
NC_002978	Wolbachia endosymbiont of Drosophila melanogaster	1267782	567453-582561	2	549453-587732	2	483194-636325	1	548107-573485	1	560258-573485	2	542719-616980	2	538372-633930
NC_002978	Wolbachia endosymbiont of Drosophila melanogaster	1267782	245829-275225	1	239194-268811	2	192754-325943	2	236214-278992	1	253153-278900	1	268932-233594	1	226843-265268
NC_002978	Wolbachia endosymbiont of Drosophila melanogaster	1267782	623343-634537	1	623342-633879	2	483194-636325	1	626320-642425	2	614233-650482	0	NA	1	538372-633930
NC_003030	Clostridium acetobutylicum ATCC 824	3940880	1277643-1346789	0	NA	0	NA	1	1274369-1283638	1	1274369-1283638	2	1272940-1375170	0	NA
NC_003030	Clostridium acetobutylicum ATCC 824	3940880	2024020-2074254	1	2038189-2045735,2050590-2064763	1	2038189-2045735,2050590-2064763	2	2013351-2078513	2	2013351-2078513	1	2014180-2062112	0	NA
NC_003112	Neisseria meningitidis MC58	2272360	1099910-1133980	1	1108356-1133966	1	1067584-1133760	1	1101164-1133966	1	1101164-1133760	1	1097672-1133760	1	1099861-1128672
NC_003112	Neisseria meningitidis MC58	2272360	1001560-1005455	2	1000554-1023221	0	NA	0	NA	0	NA	0	NA	0	NA
NC_003116	Neisseria meningitidis serogroup A strain Z2491	2184406	1207416-1236260	1	1218292-1236260	1	1218292-1236054	1	1218293-1236260	0	NA	1	1208979-1235758	0	NA
NC_003116	Neisseria meningitidis serogroup A strain Z2491	2184406	1768546-1807515	1	1768545-1804166	1	1768545-1778284,1781414-1807515	2	1768546-1807515	2	1768546-1807515	1	1769385-1807775	0	NA
NC_003116	Neisseria meningitidis serogroup A strain Z2491	2184406	1131796-1138899	2	1129590-1179821	1	1129590-1137568	0	NA	2	1129591-1138899	0	NA	0	NA
NC_003143	Yersinia pestis CO92	4653728	1392489-1416524	1	1389172-1399104,1404042-1410182	1	1383478-1410182	0	NA	0	NA	0	NA	2	1318703-1428543
NC_003143	Yersinia pestis CO92	4653728	2115626-2122603	0	NA	0	NA	2	2111358-2140547	2	2115553-2124318	0	NA	2	2088068-2140018
NC_003143	Yersinia pestis CO92	4653728	2363019-2413098	1	2363015-2404493	2	2363015-2452065	1	2362960-2404684	1	2364324-2404493	1	2356340-2403064	1	2362494-2409429
NC_003143	Yersinia pestis CO92	4653728	1233128-1243405	0	NA	0	NA	0	NA	2	1219762-1253172	0	NA	0	NA
NC_003143	Yersinia pestis CO92	4653728	2554373-2563203	0	NA	0	NA	0	NA	1	2555162-2562034	0	NA	0	NA
NC_003143	Yersinia pestis CO92	4653728	964013-971311	0	NA	0	NA	2	954442-989832	0	NA	0	NA	0	NA
NC_003198	Salmonella enterica subsp. enterica serovar Typhi str. CT18	4809037	3515470-3548975	2	3512959-3548975	2	3464803-3604565	2	3504242-3555052	2	3504242-3555052	2	3506373-3551461	2	3512911-3549026
NC_003198	Salmonella enterica subsp. enterica serovar Typhi str. CT18	4809037	4473973-4507270	1	4467674-4496010,4499222-4507730	2	4467674-4542913	2	4459144-4507514	2	4462428-4507602	2	4459393-4553251	2	4404800-4542964
NC_003198	Salmonella enterica subsp. enterica serovar Typhi str. CT18	4809037	1888674-1933558	2	1887745-1935921	1	1889470-1935921	2	1885326-1933598	2	1879226-1937407	2	1933643-1879753	2	1872238-1937458
NC_003198	Salmonella enterica subsp. enterica serovar Typhi str. CT18	4809037	2760475-2768771	1	2760909-2774301	1	2760909-2774301	0	NA	0	NA	2	2759379-2774080	2	2755790-2780969
NC_003198	Salmonella enterica subsp. enterica serovar Typhi str. CT18	4809037	1008747-1052755	2	1008746-1055793	2	1008746-1055793	2	1008698-1053060	2	1008698-1053060	2	1008698-1053074	1	1008588-1047871
NC_003198	Salmonella enterica subsp. enterica serovar Typhi str. CT18	4809037	1538899-1572919	2	1538898-1572919	2	1529646-1572919	2	1538899-1572919	2	1538899-1572919	2	1537773-1572919	1	1539858-1572970
NC_003198	Salmonella enterica subsp. enterica serovar Typhi str. CT18	4809037	4683853-4694545	2	4681891-4695440	1	4685180-4694545	2	4683670-4696075	2	4683670-4695074	0	NA	0	NA
NC_003210	Listeria monocytogenes EGD-e	2944528	2361897-2400243	2	2360713-2403235	2	2360907-2403235	2	2360908-2403235	2	2360908-2403235	2	2347276-2403235	2	2360665-2403286
NC_003210	Listeria monocytogenes EGD-e	2944528	120654-131380	1	120653-127178	1	120653-127178	2	120654-131380	2	120654-131380	0	NA	2	60899-153379
NC_003295	Ralstonia solanacearum GMI1000	3716413	879632-939437	1	877244-899438,909710-931761	1	841310-899438,909710-918732	1	887600-899438	1	883334-899438	1	879632-918732	2	864336-942264
NC_003295	Ralstonia solanacearum GMI1000	3716413	3486521-3505550	1	3487428-3498183	1	3487428-3498183	0	NA	1	3479557-3495896	0	NA	2	3430346-3512307
NC_003295	Ralstonia solanacearum GMI1000	3716413	2684129-2695788	0	NA	0	NA	0	NA	0	NA	0	NA	2	2677025-2699776
NC_003295	Ralstonia solanacearum GMI1000	3716413	1781995-1823953	1	1797956-1821238	2	1756421-1830338	1	1798179-1821238	1	1797957-1821238	1	1787235-1846153	1	1788642-1824617
NC_003295	Ralstonia solanacearum GMI1000	3716413	2084602-2124346	1	2084601-2121375	2	2047947-2160147	2	2084443-2125140	2	2084443-2125140	1	2084602-2115573	1	2085975-2126171
NC_003295	Ralstonia solanacearum GMI1000	3716413	2049204-2056036	0	NA	2	2047947-2160147	0	NA	0	NA	0	NA	0	NA
NC_003295	Ralstonia solanacearum GMI1000	3716413	1003644-1018473	1	1004869-1013032	1	1004869-1013032	0	NA	0	NA	0	NA	0	NA
NC_003295	Ralstonia solanacearum GMI1000	3716413	1591303-1598986	1	1539242-1598127	0	NA	0	NA	0	NA	0	NA	0	NA
NC_003317	Brucella melitensis bv. 1 str. 16M	2117144	688150-710247	0	NA	0	NA	0	NA	0	NA	0	NA	0	NA
NC_003366	Clostridium perfringens str. 13	3031430	1298199-1327800	1	1310118-1327800	2	1294598-1327800	1	1310119-1327800	1	1310119-1327800	2	1297893-1334100	2	1290467-1338034
NC_003888	Streptomyces coelicolor A3(2)	8667507	6107817-6120760	0	NA	0	NA	0	NA	0	NA	0	NA	0	NA
NC_003902	Xanthomonas campestris pv. campestris str. ATCC 33913	5076188	3523234-3560198	1	3528128-3549464	1	3528128-3577811	2	3523035-3562020	2	3523035-3562020	2	3560388-3523026	2	3522480-3560249
NC_003902	Xanthomonas campestris pv. campestris str. ATCC 33913	5076188	2441850-2447920	2	2436207-2448519	2	2386708-2496639	2	2435792-2454339	2	2423305-2465700	0	NA	2	2434364-2450492
NC_003902	Xanthomonas campestris pv. campestris str. ATCC 33913	5076188	2435595-2441676	1	2436207-2448519	2	2386708-2496639	1	2435792-2454339	2	2423305-2465700	0	NA	2	2434364-2450492
NC_003919	Xanthomonas axonopodis pv. citri str. 306	5175554	3105263-3115868	2	3104372-3120462	2	3048703-3118215	2	3081509-3127792	2	3081509-3127792	2	3103577-3121736	2	3093943-3127118
NC_003919	Xanthomonas axonopodis pv. citri str. 306	5175554	1211424-1228677	2	1204276-1234901	0	NA	2	1209301-1229038	2	1209301-1229038	0	NA	1	1211061-1228322
NC_003923	Staphylococcus aureus subsp. aureus MW2	2820462	1529381-1573005	2	1529380-1579915	2	1493286-1579915	2	1522193-1584849	2	1522193-1584849	2	1528947-1591460	2	1528898-1580672
NC_003923	Staphylococcus aureus subsp. aureus MW2	2820462	2046605-2088749	2	2046032-2091958	2	2046032-2103827	2	2036088-2091958	2	2036088-2091958	2	2046033-2102909	1	2045987-2086003
NC_003997	Bacillus anthracis str. Ames	5227293	3745958-3791042	1	3744170-3787790	1	3744170-3787790	2	3743581-3795489	2	3743581-3795996	2	3745558-3789863	0	NA
NC_003997	Bacillus anthracis str. Ames	5227293	447387-484339	1	445946-476616	1	445946-476616,480504-484339	2	442049-487496	2	447156-484418	2	447156-484418	0	NA
NC_003997	Bacillus anthracis str. Ames	5227293	4842149-4858240	1	4849800-4859679	1	4846922-4859679	1	4845035-4859679	2	4828728-4859679	2	4841817-4858489	0	NA
NC_003997	Bacillus anthracis str. Ames	5227293	3456916-3505685	1	3453805-3482979,3495317-3506871	1	3453805-3482979,3495317-3505502	2	3452694-3517426	2	3451327-3524718	1	3452750-3491969	0	NA
NC_004070	Streptococcus pyogenes MGAS315	1900521	1137743-1171867	2	1134115-1174569	2	1134115-1174569	2	1130998-1172231	2	1130998-1172231	2	1137743-1172231	2	1137694-1172282
NC_004070	Streptococcus pyogenes MGAS315	1900521	1230304-1271815	2	1227588-1271815	2	1227588-1271815	2	1227589-1283428	2	1227589-1283428	2	1230304-1271815	2	1227540-1271866
NC_004070	Streptococcus pyogenes MGAS315	1900521	1410725-1450458	2	1408470-1452968	2	1373172-1452968	2	1410542-1452968	2	1398706-1455520	2	1410725-1453268	2	1410676-1453019
NC_004070	Streptococcus pyogenes MGAS315	1900521	1313282-1351250	2	1311735-1351250	2	1311735-1351250	2	1313282-1354212	2	1313282-1354212	1	1170603-1349925	2	1313233-1351301
NC_004070	Streptococcus pyogenes MGAS315	1900521	749213-788176	2	749212-791142	2	749212-791142	2	742914-788640	2	742914-788640	1	749180-787900	2	749164-788227
NC_004070	Streptococcus pyogenes MGAS315	1900521	977738-1018193	2	970941-1056260	2	943909-1021697	2	974608-1026068	2	974608-1026068	2	977267-1018334	1	974559-1016721
NC_004088	Yersinia pestis KIM10	4600755	2417129-2456467	2	2415699-2456467	2	2367649-2467075	2	2415700-2456467	2	2415700-2456467	2	2456523-2415479	0	NA
NC_004088	Yersinia pestis KIM10	4600755	3237524-3255252	1	3237523-3243663,3248601-3258568	2	3227059-3258568	0	NA	1	3237524-3247743	0	NA	0	NA
NC_004088	Yersinia pestis KIM10	4600755	3389410-3399754	1	3396305-3402477	1	3396305-3402477	0	NA	2	3381641-3415033	0	NA	0	NA
NC_004088	Yersinia pestis KIM10	4600755	2693615-2700576	0	NA	0	NA	2	2676239-2705458	2	2691227-2700576	0	NA	0	NA
NC_004088	Yersinia pestis KIM10	4600755	3595228-3601343	0	NA	0	NA	2	3584471-3619864	0	NA	0	NA	0	NA
NC_004116	Streptococcus agalactiae 2603V/R	2160267	1833318-1867117	2	1831366-1867117	2	1831366-1867117	2	1816883-1876441	2	1816883-1876441	2	1833085-1867188	2	1833269-1869618
NC_004116	Streptococcus agalactiae 2603V/R	2160267	558254-599207	2	555616-604592	2	555616-599207	2	550498-617294	2	554829-601907	1	558767-599345	1	558777-609162
NC_004193	Oceanobacullus iheyensis HTE831	3630528	226976-239888	2	226975-239888	2	226975-239888	check	NA	2	226976-239888	0	NA	2	165611-280245
NC_004310	Brucella suis 1330	2107794	578085-584879	0	NA	0	NA	1	578497-592232	1	578578-588373	1	578473-593729	2	552820-640419
NC_004337	Shigella flexneri 2a str. 301	4607203	1919854-1942697	2	1912620-1946939	2	1919852-1962809	2	1916802-1946940	2	1915150-1946940	2	1878093-1946155	2	1883563-1964984
NC_004337	Shigella flexneri 2a str. 301	4607203	696659-747734	2	675736-747734	2	656763-747734	2	696659-747734	2	696659-752084	2	691703-749677	2	695931-750017
NC_004337	Shigella flexneri 2a str. 301	4607203	1175319-1188408	2	1175318-1188408	1	1178709-1211025	2	1174944-1188408	2	1174910-1189400	2	1170913-1188703	2	1170864-1228734
NC_004337	Shigella flexneri 2a str. 301	4607203	2049694-2066397	2	2030313-2087783	1	2030313-2065123	2	2030315-2079334	2	2030315-2079334	2	2030765-2095753	2	2037355-2111943
NC_004337	Shigella flexneri 2a str. 301	4607203	238841-251370	2	203274-252705	2	203274-267434	2	236055-252705	2	235830-252705	0	NA	2	234814-252756
NC_004337	Shigella flexneri 2a str. 301	4607203	311291-328079	2	260069-372291	2	306598-334061	2	306583-340775	2	306583-340775	0	NA	2	262317-332846
NC_004337	Shigella flexneri 2a str. 301	4607203	899706-918668	2	825905-921295	2	836693-966062	2	899339-921295	2	898668-918668	2	860418-935972	0	NA
NC_004337	Shigella flexneri 2a str. 301	4607203	1395280-1421884	2	1365996-1436753	2	1387235-1421884	1	1387236-1407895	1	1387236-1407895	0	NA	0	NA
NC_004337	Shigella flexneri 2a str. 301	4607203	2227585-2235565	2	2186690-2240202	2	2149246-2240202	2	2220680-2240203	1	2229979-2240203	0	NA	0	NA
NC_004337	Shigella flexneri 2a str. 301	4607203	2683559-2698944	1	2684930-2695523	2	2682224-2735491	1	2684932-2695524	1	2684932-2695524	0	NA	0	NA
NC_004347	Shewanella oneidensis MR-1	4969803	2788311-2822840	2	2788310-2825668	2	2759463-2851016	1	2788307-2822836	1	2788307-2822836	1	2789053-2820459	2	2788286-2822865
NC_004347	Shewanella oneidensis MR-1	4969803	3075413-3126253	1	3087994-3126253	2	3038316-3126253	1	3076443-3126349	1	3069340-3114921	2	3052470-3127027	0	NA
NC_004347	Shewanella oneidensis MR-1	4969803	669361-705623	1	672705-688710,693402-708836	1	628737-688710	2	655830-720989	2	655830-720989	1	668166-726876	0	NA
NC_004431	Escherichia coli CFT073	5231428	3019963-3065315	2	3017481-3065315	2	2974893-3065315	2	3007212-3065315	2	3007212-3065718	1	3021386-3068634	2	3019914-3066568
NC_004431	Escherichia coli CFT073	5231428	909332-942273	2	909331-942273	2	909331-981561	2	908948-945468	2	908948-945468	1	980081-923316	2	908268-942324
NC_004431	Escherichia coli CFT073	5231428	1378215-1388952	0	NA	2	1311802-1446309	1	1324666-1381279	2	1377873-1389092	0	NA	2	1377863-1446360
NC_004431	Escherichia coli CFT073	5231428	1169792-1228729	2	1161998-1239935	1	1174437-1214183	0	NA	0	NA	0	NA	2	1143678-1239986
NC_004431	Escherichia coli CFT073	5231428	1397370-1452231	1	1396017-1446309	1	1311802-1446309	2	1394721-1452255	2	1394721-1452255	1	1394721-1446615	1	1377863-1446360
NC_004431	Escherichia coli CFT073	5231428	1327053-1372820	1	1329431-1375035	2	1311802-1446309	2	1324666-1381279	1	1327914-1375035	0	NA	1	1337154-1371109
NC_004431	Escherichia coli CFT073	5231428	4923133-4929628	2	4910096-4940645	0	NA	0	NA	0	NA	0	NA	0	NA
NC_004556	Xylella fastidiosa Temecula1	2519802	454017-467611	2	450824-469025	2	450824-469025	2	446956-480065	2	450825-469025	2	446192-469025	2	453968-469076
NC_004556	Xylella fastidiosa Temecula1	2519802	1161143-1217907	1	1161142-1180387,1194755-1217907	1	1161142-1180387,1194755-1217907	1	1161143-1180387	1	1161143-1180387	2	1155829-1217907	1	1118476-1208208
NC_004556	Xylella fastidiosa Temecula1	2519802	1288547-1392763	1	1288022-1331541,1373809-1397310	1	1288022-1331541,1373809-1397310	1	1288023-1331541	1	1288023-1331541	1	1285789-1319856	1	1373761-1394818
NC_004556	Xylella fastidiosa Temecula1	2519802	1117952-1142627	1	1120089-1136615	1	1120089-1136615	1	1132387-1143339	1	1128417-1143372	0	NA	1	1118476-1208208
NC_004556	Xylella fastidiosa Temecula1	2519802	1847752-1855582	1	1848607-1857049	1	1848607-1857049	0	NA	0	NA	1	1847783-1861629	0	NA
NC_004556	Xylella fastidiosa Temecula1	2519802	1550281-1556188	1	1542768-1552797	1	1542768-1552797	0	NA	0	NA	0	NA	0	NA
NC_004556	Xylella fastidiosa Temecula1	2519802	2005731-2020421	1	2009726-2018928	1	2009726-2018928	1	2005890-2022616	2	2005731-2022616	0	NA	0	NA
NC_004557	Clostridium tetani E88	2799251	2242455-2281387	2	2237703-2286336	2	2233072-2286330	2	2232193-2282092	1	2248862-2282092	1	2243139-2281381	2	2241711-2287008
NC_004557	Clostridium tetani E88	2799251	1663821-1696272	1	1663820-1682779	1	1663820-1682779	1	1657696-1693071	1	1657696-1693071	1	1663821-1693367	1	1663772-1694387
NC_004557	Clostridium tetani E88	2799251	1138054-1181003	2	1133918-1184898	2	1133918-1184898	2	1137606-1185305	2	1137516-1192459	1	1137516-1207515	0	NA
NC_004567	Lactobacillus plantarum WCFS1	3308274	2161732-2203820	1	2163937-2170946,2178613-2199286	1	2163937-2218340	1	2157270-2197761,2188411-2232769	2	2156166-2225484	1	2204058-2162769	2	2156233-2229052
NC_004567	Lactobacillus plantarum WCFS1	3308274	590128-633804	1	590127-611278,617133-628381	1	579544-628381	1	589608-631770	1	589608-633123	1	606331-644059	2	589928-641166
NC_004567	Lactobacillus plantarum WCFS1	3308274	2204171-2218342	1	2206068-2218340	1	2163937-2218340	2	2188411-2232769	2	2156166-2225484	0	NA	2	2156233-2229052
NC_004567	Lactobacillus plantarum WCFS1	3308274	2998563-3007280	0	NA	0	NA	0	NA	2	2983800-3011137	0	NA	0	NA
NC_004578	Pseudomonas syringae pv. Tomato str. DC3000	6397126	3824683-3865352	1	3830041-3856611	1	3830041-3856611,3862799-3868712	1	3825215-3859787	1	3824685-3865355	1	3824685-3865368	2	3823139-3879829
NC_004578	Pseudomonas syringae pv. Tomato str. DC3000	6397126	625118-647483	1	627370-639178	1	628135-639178	2	623546-651202	1	628136-656971	1	627371-650980	1	628087-645372
NC_004578	Pseudomonas syringae pv. Tomato str. DC3000	6397126	4543843-4563495	2	4540715-4566113	2	4540715-4566113	2	4531872-4566113	2	4528890-4566113	2	4522351-4563612	0	NA
NC_004578	Pseudomonas syringae pv. Tomato str. DC3000	6397126	2252628-2264999	2	2252627-2271122	2	2252627-2271122	1	2253004-2271122	1	2253004-2271122	0	NA	0	NA
NC_004606	Streptococcus pyogenes SSI-1	1894275	446427-486160	2	443901-488414	2	428787-488414	2	443902-486331	2	441336-498166	2	438937-486160	2	443853-486211
NC_004606	Streptococcus pyogenes SSI-1	1894275	625070-666334	2	625069-669296	2	625069-669296	2	623853-669296	2	623853-669296	2	625070-666581	2	625021-669347
NC_004606	Streptococcus pyogenes SSI-1	1894275	725017-759141	2	722314-762768	2	722314-762768	2	724653-759311	2	724653-759311	2	724653-759141	2	724604-759192
NC_004606	Streptococcus pyogenes SSI-1	1894275	1107957-1147543	2	1101461-1147543	2	1074429-1147543	2	1098746-1161348	2	1098746-1161348	1	1108145-1147543	2	1105079-1147594
NC_004606	Streptococcus pyogenes SSI-1	1894275	545636-583603	2	545635-585149	2	545635-585149	2	545487-583678	2	545487-583678	1	546802-583603	2	545587-583654
NC_004606	Streptococcus pyogenes SSI-1	1894275	878690-919064	2	840622-922030	2	875185-922030	2	877707-924828	2	877707-924828	2	877707-919445	1	880164-919115
NC_004631	Salmonella enterica subsp. enterica serovar Typhi Ty2	4791961	1928058-1972330	2	1925019-1972330	2	1925019-1972330	2	1927739-1972365	2	1928058-1972330	2	1928058-1972330	2	1927991-1977007
NC_004631	Salmonella enterica subsp. enterica serovar Typhi Ty2	4791961	2735202-2754628	2	2735000-2760158	2	2735033-2760158	2	2734604-2760158	2	2734604-2759926	2	2731064-2760158	2	2731015-2766826
NC_004631	Salmonella enterica subsp. enterica serovar Typhi Ty2	4791961	4458029-4490856	1	4451267-4479602,4482814-4491316	2	4419988-4512603	2	4446021-4491188	2	4446021-4491188	2	4455671-4492220	2	4389450-4525866
NC_004631	Salmonella enterica subsp. enterica serovar Typhi Ty2	4791961	1314607-1441766	1	1408217-1441766	1	1377892-1451018	1	1408218-1441766	1	1408218-1441766	1	1408218-1441766	1	1408169-1440809
NC_004631	Salmonella enterica subsp. enterica serovar Typhi Ty2	4791961	3501128-3538076	1	3498617-3534635	1	3498617-3536675	2	3489900-3540712	2	3489900-3540712	1	3501128-3537121	1	3498569-3534686
NC_004631	Salmonella enterica subsp. enterica serovar Typhi Ty2	4791961	4671630-4678034	2	4664780-4678328	1	4664780-4674545	2	4666559-4678557	1	4666559-4677962	0	NA	0	NA
NC_004668	Enterococcus faecalis V583	3218031	1398097-1443843	2	1398096-1443843	2	1398096-1443843	2	1398051-1446151	2	1398051-1447105	2	1398097-1447105	2	1398048-1445757
NC_004668	Enterococcus faecalis V583	3218031	289354-326185	2	289353-326185	2	289353-326185	2	288966-332964	2	288966-332964	2	289300-326362	2	289305-326236
NC_004668	Enterococcus faecalis V583	3218031	2700666-2736808	1	2707947-2741423	1	2701328-2741423	2	2697272-2736808	2	2697272-2736808	1	2704844-2736808	2	2695652-2736859
NC_004668	Enterococcus faecalis V583	3218031	1245337-1259965	2	1242192-1259965	2	1242192-1259965	2	1245337-1259965	2	1245337-1259965	0	NA	2	1223207-1313629
NC_004668	Enterococcus faecalis V583	3218031	1923000-1962485	1	1925422-1933732,1952425-1962485	2	1910520-1962485	1	1925423-1948114	1	1933729-1948114	0	NA	2	1921822-1962980
NC_004668	Enterococcus faecalis V583	3218031	2817287-2829554	0	NA	0	NA	0	NA	2	2815978-2832090	0	NA	2	2816852-2830568
NC_004668	Enterococcus faecalis V583	3218031	2004910-2048146	1	2002277-2020730,2031762-2045460	1	2002277-2020730,2031762-2045460	1	2001579-2020730	1	2001579-2020730	0	NA	0	NA
NC_004722	Bacillus cereus ATCC 14579	5411809	2531805-2565093	1	2530047-2537608,2542035-2565093	1	2530047-2537608,2542035-2577088	2	2520823-2579367	2	2520823-2579367	2	2525985-2578173	2	2528468-2566035
NC_004722	Bacillus cereus ATCC 14579	5411809	2355784-2369311	0	NA	0	NA	0	NA	0	NA	0	NA	2	2299248-2388144
NC_004722	Bacillus cereus ATCC 14579	5411809	1805567-1866036	1	1819831-1831579,1843341-1866036	1	1819849-1831579,1844977-1866036	2	1803335-1866036	2	1803335-1866036	2	1866407-1802377	1	1804739-1864069
NC_004722	Bacillus cereus ATCC 14579	5411809	3660466-3668825	2	3657053-3668825	2	3657041-3668825	2	3655937-3668825	2	3655937-3668825	0	NA	0	NA
NC_005085	Chromobacterium violaceum ATCC 12472	4751080	2303969-2334742	2	2300704-2340922	2	2288696-2340922	2	2300705-2339162	2	2300705-2339162	2	2300705-2339528	2	2300656-2337036
NC_005085	Chromobacterium violaceum ATCC 12472	4751080	353384-372826	2	353383-373540	2	353383-373540	2	353384-378213	2	353384-378213	0	NA	2	351752-372877
NC_005085	Chromobacterium violaceum ATCC 12472	4751080	428568-450397	1	427982-431616,435089-447996	1	427982-447996	1	427983-447996	2	427983-450397	0	NA	1	428944-449990
NC_005362	Lactobacillus johnsonii NCC 533	1992676	1292553-1330377	2	1286672-1333721	2	1260690-1330377	2	1287749-1331686	2	1287749-1331686	2	1330481-1292072	2	1292504-1330428
NC_005362	Lactobacillus johnsonii NCC 533	1992676	327894-367791	2	325950-374448	2	308536-374448	2	327847-374448	2	327847-374448	2	327838-367873	2	327560-370662

## Sheet: Table S3
Supplenmentary Table S3 The predicted prophages and related information of 400 HMP bacterial genome using DBSCAN-SWA
genome	contig_id	contig_def	genome_size	prophage_start	prophage_end	key_proteins	best_hit_species	CDS_number	attl_region	attr_region
Escherichia_coli_MS_110-3	GG772997	GG772997 Escherichia coli MS 110-3 genomic scaffold Scfld73, whole genome shotgun sequence. [Escherichia coli MS 110-3]	311867	264781	271921		Escherichia_phage(83.33%)	6	NA	NA
Escherichia_coli_MS_110-3	GG773009	GG773009 Escherichia coli MS 110-3 genomic scaffold Scfld202, whole genome shotgun sequence. [Escherichia coli MS 110-3]	307969	32948	75206	protease,integrase	Enterobacteria_phage(75.81%)	64	34017:34033	75280:75296
Escherichia_coli_MS_110-3	GG773009	GG773009 Escherichia coli MS 110-3 genomic scaffold Scfld202, whole genome shotgun sequence. [Escherichia coli MS 110-3]	307969	202400	208890		Escherichia_phage(57.14%)	7	NA	NA
Escherichia_coli_MS_110-3	GG773009	GG773009 Escherichia coli MS 110-3 genomic scaffold Scfld202, whole genome shotgun sequence. [Escherichia coli MS 110-3]	307969	239914	249802	tRNA	Mycoplasma_phage(14.29%)	12	NA	NA
Escherichia_coli_MS_110-3	GG773044	GG773044 Escherichia coli MS 110-3 genomic scaffold Scfld723, whole genome shotgun sequence. [Escherichia coli MS 110-3]	101257	13899	21258		Mycobacterium_phage(33.33%)	7	NA	NA
Escherichia_coli_MS_110-3	GG773044	GG773044 Escherichia coli MS 110-3 genomic scaffold Scfld723, whole genome shotgun sequence. [Escherichia coli MS 110-3]	101257	34627	71029	tail	Shigella_phage(52.0%)	57	NA	NA
Escherichia_coli_MS_110-3	GG773036	GG773036 Escherichia coli MS 110-3 genomic scaffold Scfld606, whole genome shotgun sequence. [Escherichia coli MS 110-3]	351435	204758	214216		Enterobacteria_phage(75.0%)	10	NA	NA
Escherichia_coli_MS_110-3	GG773036	GG773036 Escherichia coli MS 110-3 genomic scaffold Scfld606, whole genome shotgun sequence. [Escherichia coli MS 110-3]	351435	310011	320700		Enterobacteria_phage(37.5%)	11	NA	NA
Escherichia_coli_MS_110-3	GG772987	GG772987 Escherichia coli MS 110-3 genomic scaffold Scfld28, whole genome shotgun sequence. [Escherichia coli MS 110-3]	31025	22934	30786		Bradyrhizobium_phage(16.67%)	9	NA	NA
Escherichia_coli_MS_110-3	GG773035	GG773035 Escherichia coli MS 110-3 genomic scaffold Scfld548, whole genome shotgun sequence. [Escherichia coli MS 110-3]	15804	80	15267		Enterobacteria_phage(52.63%)	22	NA	NA
Escherichia_coli_MS_110-3	GG773004	GG773004 Escherichia coli MS 110-3 genomic scaffold Scfld152, whole genome shotgun sequence. [Escherichia coli MS 110-3]	139373	120	20722		Enterobacteria_phage(28.57%)	30	NA	NA
Escherichia_coli_MS_110-3	GG773004	GG773004 Escherichia coli MS 110-3 genomic scaffold Scfld152, whole genome shotgun sequence. [Escherichia coli MS 110-3]	139373	126148	138391	tail	Enterobacteria_phage(66.67%)	13	NA	NA
Escherichia_coli_MS_110-3	GG773027	GG773027 Escherichia coli MS 110-3 genomic scaffold Scfld377, whole genome shotgun sequence. [Escherichia coli MS 110-3]	7244	28	4818		Enterobacteria_phage(62.5%)	9	NA	NA
Escherichia_coli_MS_110-3	GG773021	GG773021 Escherichia coli MS 110-3 genomic scaffold Scfld311, whole genome shotgun sequence. [Escherichia coli MS 110-3]	479242	118	19445		Enterobacteria_phage(54.84%)	34	NA	NA
Escherichia_coli_MS_110-3	GG773021	GG773021 Escherichia coli MS 110-3 genomic scaffold Scfld311, whole genome shotgun sequence. [Escherichia coli MS 110-3]	479242	158392	168452	protease	Vibrio_phage(33.33%)	6	NA	NA
Escherichia_coli_MS_110-3	GG773033	GG773033 Escherichia coli MS 110-3 genomic scaffold Scfld465, whole genome shotgun sequence. [Escherichia coli MS 110-3]	750932	321423	332295		Sodalis_phage(14.29%)	11	NA	NA
Bacteroides_xylanisolvens_XB1A	FP929033	FP929033 Bacteroides xylanisolvens XB1A draft genome. [Bacteroides xylanisolvens XB1A]	5976145	3876770	3885548		Arthrobacter_phage(16.67%)	9	NA	NA
Lactobacillus_reuteri_SD2112	CP002844	CP002844 Lactobacillus reuteri SD2112, complete genome. [Lactobacillus reuteri SD2112]	2264399	422743	434103	transposase	Bacillus_virus(25.0%)	11	NA	NA
Lactobacillus_reuteri_SD2112	CP002844	CP002844 Lactobacillus reuteri SD2112, complete genome. [Lactobacillus reuteri SD2112]	2264399	470450	495615	protease,transposase	Erysipelothrix_phage(75.0%)	28	NA	NA
Lactobacillus_reuteri_SD2112	CP002844	CP002844 Lactobacillus reuteri SD2112, complete genome. [Lactobacillus reuteri SD2112]	2264399	511421	536259	protease	Erysipelothrix_phage(85.71%)	31	NA	NA
Lactobacillus_reuteri_SD2112	CP002844	CP002844 Lactobacillus reuteri SD2112, complete genome. [Lactobacillus reuteri SD2112]	2264399	1230350	1238064	tRNA,transposase	Lactobacillus_phage(33.33%)	8	NA	NA
Lactobacillus_reuteri_SD2112	CP002844	CP002844 Lactobacillus reuteri SD2112, complete genome. [Lactobacillus reuteri SD2112]	2264399	1549001	1560566	tRNA,transposase	Streptococcus_phage(37.5%)	13	NA	NA
Lactobacillus_reuteri_SD2112	CP002844	CP002844 Lactobacillus reuteri SD2112, complete genome. [Lactobacillus reuteri SD2112]	2264399	2063300	2071075	transposase	Staphylococcus_phage(33.33%)	7	NA	NA
Lactobacillus_reuteri_SD2112	CP002844	CP002844 Lactobacillus reuteri SD2112, complete genome. [Lactobacillus reuteri SD2112]	2264399	2098776	2137900	transposase	Lactobacillus_phage(88.24%)	61	NA	NA
Lactobacillus_reuteri_SD2112	CP002844	CP002844 Lactobacillus reuteri SD2112, complete genome. [Lactobacillus reuteri SD2112]	2264399	2150076	2156987	transposase	Lactobacillus_phage(42.86%)	9	NA	NA
Bifidobacterium_longum_subsp._longum_ATCC_55813	GG666855	GG666855 Bifidobacterium longum subsp. longum ATCC 55813 genomic scaffold SCAFFOLD7, whole genome shotgun sequence. [Bifidobacterium longum subsp. longum ATCC 55813]	84197	52672	62600		Mycobacterium_phage(28.57%)	9	NA	NA
Sutterella_parvirubra_YIT_11816	JH605003	JH605003 Sutterella parvirubra YIT 11816 genomic scaffold Scfld720, whole genome shotgun sequence. [Sutterella parvirubra YIT 11816]	58855	46770	53412		Bacillus_phage(33.33%)	8	NA	NA
Sutterella_parvirubra_YIT_11816	JH605004	JH605004 Sutterella parvirubra YIT 11816 genomic scaffold Scfld725, whole genome shotgun sequence. [Sutterella parvirubra YIT 11816]	40291	22104	29283		Aeromonas_phage(33.33%)	10	NA	NA
Fusobacterium_nucleatum_subsp._animalis_11_3_2	GL945393	GL945393 Fusobacterium sp. 11_3_2 genomic scaffold supercont1.3, whole genome shotgun sequence. [Fusobacterium nucleatum subsp. animalis 11_3_2]	331754	18886	36347		Clostridium_phage(42.86%)	22	NA	NA
Fusobacterium_nucleatum_subsp._animalis_11_3_2	GL945391	GL945391 Fusobacterium sp. 11_3_2 genomic scaffold supercont1.1, whole genome shotgun sequence. [Fusobacterium nucleatum subsp. animalis 11_3_2]	1297456	707508	718184		Prochlorococcus_phage(28.57%)	8	NA	NA
Fusobacterium_nucleatum_subsp._animalis_11_3_2	GL945391	GL945391 Fusobacterium sp. 11_3_2 genomic scaffold supercont1.1, whole genome shotgun sequence. [Fusobacterium nucleatum subsp. animalis 11_3_2]	1297456	1078180	1114823	protease	Clostridium_phage(36.67%)	56	NA	NA
Fusobacterium_nucleatum_subsp._animalis_11_3_2	GL945391	GL945391 Fusobacterium sp. 11_3_2 genomic scaffold supercont1.1, whole genome shotgun sequence. [Fusobacterium nucleatum subsp. animalis 11_3_2]	1297456	1198969	1243642	protease	Fusobacterium_phage(95.31%)	77	NA	NA
Fusobacterium_nucleatum_subsp._animalis_11_3_2	GL945395	GL945395 Fusobacterium sp. 11_3_2 genomic scaffold supercont1.5, whole genome shotgun sequence. [Fusobacterium nucleatum subsp. animalis 11_3_2]	214053	110623	120469		Enterobacteria_phage(33.33%)	8	NA	NA
Roseburia_intestinalis_XB6B4	FP929050	FP929050 Roseburia intestinalis XB6B4 draft genome. [Roseburia intestinalis XB6B4]	4286292	554678	568089		Acanthocystis_turfacea_Chlorella_virus(16.67%)	9	NA	NA
Roseburia_intestinalis_XB6B4	FP929050	FP929050 Roseburia intestinalis XB6B4 draft genome. [Roseburia intestinalis XB6B4]	4286292	3259790	3272065		Streptococcus_phage(90.0%)	11	NA	NA
Roseburia_intestinalis_XB6B4	FP929050	FP929050 Roseburia intestinalis XB6B4 draft genome. [Roseburia intestinalis XB6B4]	4286292	3434327	3443502		Escherichia_phage(33.33%)	11	NA	NA
Roseburia_intestinalis_XB6B4	FP929050	FP929050 Roseburia intestinalis XB6B4 draft genome. [Roseburia intestinalis XB6B4]	4286292	3997569	4023600		unidentified_phage(20.0%)	48	NA	NA
Roseburia_intestinalis_XB6B4	FP929050	FP929050 Roseburia intestinalis XB6B4 draft genome. [Roseburia intestinalis XB6B4]	4286292	4185808	4195835		Staphylococcus_phage(33.33%)	6	NA	NA
Bacteroides_stercoris_ATCC_43183	DS499674	DS499674 Bacteroides stercoris ATCC 43183 Scfld_02_13 genomic scaffold, whole genome shotgun sequence. [Bacteroides stercoris ATCC 43183]	695517	433911	443952		Yellowstone_lake_phycodnavirus(11.11%)	9	NA	NA
Helicobacter_pylori_GAM105Ai	KB636995	KB636995 Helicobacter pylori GAM105Ai genomic scaffold Scfld13, whole genome shotgun sequence. [Helicobacter pylori GAM105Ai]	5420	109	5315		Escherichia_phage(100.0%)	7	NA	NA
Helicobacter_pylori_GAM105Ai	KB637001	KB637001 Helicobacter pylori GAM105Ai genomic scaffold Scfld159, whole genome shotgun sequence. [Helicobacter pylori GAM105Ai]	15716	169	15690		Helicobacter_phage(100.0%)	23	NA	NA
Helicobacter_pylori_GAM105Ai	KB637032	KB637032 Helicobacter pylori GAM105Ai genomic scaffold Scfld9, whole genome shotgun sequence. [Helicobacter pylori GAM105Ai]	10793	2426	10430		Helicobacter_phage(100.0%)	9	NA	NA
Helicobacter_pylori_GAM105Ai	KB636989	KB636989 Helicobacter pylori GAM105Ai genomic scaffold Scfld100, whole genome shotgun sequence. [Helicobacter pylori GAM105Ai]	154813	27505	38427		uncultured_Caudovirales_phage(33.33%)	9	NA	NA
Bacteroides_salyersiae_WAL_10018_=_DSM_18765_=_JCM_12988	KB905466	KB905466 Bacteroides salyersiae WAL 10018 = DSM 18765 = JCM 12988 genomic scaffold acAqE-supercont1.1, whole genome shotgun sequence. [Bacteroides salyersiae WAL 10018 = DSM 18765 = JCM 12988]	3080894	1365130	1373752		uncultured_Mediterranean_phage(33.33%)	8	NA	NA
Bacteroides_salyersiae_WAL_10018_=_DSM_18765_=_JCM_12988	KB905466	KB905466 Bacteroides salyersiae WAL 10018 = DSM 18765 = JCM 12988 genomic scaffold acAqE-supercont1.1, whole genome shotgun sequence. [Bacteroides salyersiae WAL 10018 = DSM 18765 = JCM 12988]	3080894	2173037	2181154	transposase	Paramecium_bursaria_Chlorella_virus(16.67%)	9	NA	NA
Bacteroides_salyersiae_WAL_10018_=_DSM_18765_=_JCM_12988	KB905467	KB905467 Bacteroides salyersiae WAL 10018 = DSM 18765 = JCM 12988 genomic scaffold acAqE-supercont1.2, whole genome shotgun sequence. [Bacteroides salyersiae WAL 10018 = DSM 18765 = JCM 12988]	1584616	283730	301758		Bacteroides_phage(46.15%)	15	NA	NA
Escherichia_coli_MS_21-1	GG772625	GG772625 Escherichia coli MS 21-1 genomic scaffold Scfld175, whole genome shotgun sequence. [Escherichia coli MS 21-1]	137599	85142	136441	integrase	Salmonella_phage(40.0%)	95	82294:82308	106413:106427
Escherichia_coli_MS_21-1	GG772672	GG772672 Escherichia coli MS 21-1 genomic scaffold Scfld328, whole genome shotgun sequence. [Escherichia coli MS 21-1]	156785	11815	21375		Enterobacteria_phage(75.0%)	10	NA	NA
Escherichia_coli_MS_21-1	GG772672	GG772672 Escherichia coli MS 21-1 genomic scaffold Scfld328, whole genome shotgun sequence. [Escherichia coli MS 21-1]	156785	119143	127858		Enterobacteria_phage(42.86%)	8	NA	NA
Escherichia_coli_MS_21-1	GG772672	GG772672 Escherichia coli MS 21-1 genomic scaffold Scfld328, whole genome shotgun sequence. [Escherichia coli MS 21-1]	156785	150822	156523	integrase	Enterobacteria_phage(45.45%)	11	144190:144201	152398:152409
Escherichia_coli_MS_21-1	GG772653	GG772653 Escherichia coli MS 21-1 genomic scaffold Scfld266, whole genome shotgun sequence. [Escherichia coli MS 21-1]	55581	212	8065		Staphylococcus_phage(16.67%)	9	NA	NA
Escherichia_coli_MS_21-1	GG772723	GG772723 Escherichia coli MS 21-1 genomic scaffold Scfld527, whole genome shotgun sequence. [Escherichia coli MS 21-1]	6769	1298	4278		Enterobacteria_phage(50.0%)	6	NA	NA
Escherichia_coli_MS_21-1	GG772646	GG772646 Escherichia coli MS 21-1 genomic scaffold Scfld239, whole genome shotgun sequence. [Escherichia coli MS 21-1]	135986	71902	133588	tRNA,transposase,protease,integrase,holin	Enterobacteria_phage(15.79%)	59	84053:84067	111483:111497
Escherichia_coli_MS_21-1	GG772705	GG772705 Escherichia coli MS 21-1 genomic scaffold Scfld487, whole genome shotgun sequence. [Escherichia coli MS 21-1]	17256	10121	17063	tRNA	Escherichia_phage(50.0%)	8	NA	NA
Escherichia_coli_MS_21-1	GG772786	GG772786 Escherichia coli MS 21-1 genomic scaffold Scfld1043, whole genome shotgun sequence. [Escherichia coli MS 21-1]	168409	55143	61983		Enterobacteria_phage(100.0%)	10	NA	NA
Escherichia_coli_MS_21-1	GG772786	GG772786 Escherichia coli MS 21-1 genomic scaffold Scfld1043, whole genome shotgun sequence. [Escherichia coli MS 21-1]	168409	85293	92652		Mycobacterium_phage(33.33%)	7	NA	NA
Escherichia_coli_MS_21-1	GG772786	GG772786 Escherichia coli MS 21-1 genomic scaffold Scfld1043, whole genome shotgun sequence. [Escherichia coli MS 21-1]	168409	144949	152089		Escherichia_phage(83.33%)	6	NA	NA
Escherichia_coli_MS_21-1	GG772764	GG772764 Escherichia coli MS 21-1 genomic scaffold Scfld808, whole genome shotgun sequence. [Escherichia coli MS 21-1]	170102	18742	28612	tRNA	Brazilian_cedratvirus(14.29%)	12	NA	NA
Escherichia_coli_MS_21-1	GG772764	GG772764 Escherichia coli MS 21-1 genomic scaffold Scfld808, whole genome shotgun sequence. [Escherichia coli MS 21-1]	170102	59873	66191		Escherichia_phage(50.0%)	6	NA	NA
Escherichia_coli_MS_21-1	GG772654	GG772654 Escherichia coli MS 21-1 genomic scaffold Scfld268, whole genome shotgun sequence. [Escherichia coli MS 21-1]	7784	80	7487		Escherichia_phage(50.0%)	8	NA	NA
Escherichia_coli_MS_21-1	GG772757	GG772757 Escherichia coli MS 21-1 genomic scaffold Scfld764, whole genome shotgun sequence. [Escherichia coli MS 21-1]	37620	26575	37491		Enterobacteria_phage(33.33%)	12	NA	NA
Escherichia_coli_MS_21-1	GG772692	GG772692 Escherichia coli MS 21-1 genomic scaffold Scfld417, whole genome shotgun sequence. [Escherichia coli MS 21-1]	12454	972	12083		Enterobacteria_phage(36.36%)	13	NA	NA
Escherichia_coli_MS_21-1	GG772673	GG772673 Escherichia coli MS 21-1 genomic scaffold Scfld335, whole genome shotgun sequence. [Escherichia coli MS 21-1]	6570	360	6171		Escherichia_phage(42.86%)	11	NA	NA
Escherichia_coli_MS_21-1	GG772643	GG772643 Escherichia coli MS 21-1 genomic scaffold Scfld234, whole genome shotgun sequence. [Escherichia coli MS 21-1]	28500	116	28309	protease	Enterobacteria_phage(41.94%)	33	NA	NA
Escherichia_coli_MS_21-1	GG772684	GG772684 Escherichia coli MS 21-1 genomic scaffold Scfld389, whole genome shotgun sequence. [Escherichia coli MS 21-1]	13130	289	13031		Enterobacteria_phage(60.0%)	17	NA	NA
Escherichia_coli_MS_21-1	GG772749	GG772749 Escherichia coli MS 21-1 genomic scaffold Scfld744, whole genome shotgun sequence. [Escherichia coli MS 21-1]	12580	3263	11263	transposase	Enterobacteria_phage(42.86%)	8	NA	NA
Escherichia_coli_MS_21-1	GG772756	GG772756 Escherichia coli MS 21-1 genomic scaffold Scfld763, whole genome shotgun sequence. [Escherichia coli MS 21-1]	40179	340	16297		Burkholderia_virus(35.29%)	20	NA	NA
Escherichia_coli_MS_21-1	GG772724	GG772724 Escherichia coli MS 21-1 genomic scaffold Scfld528, whole genome shotgun sequence. [Escherichia coli MS 21-1]	8055	38	7297		Enterobacteria_phage(44.44%)	13	NA	NA
Escherichia_coli_MS_21-1	GG772614	GG772614 Escherichia coli MS 21-1 genomic scaffold Scfld132, whole genome shotgun sequence. [Escherichia coli MS 21-1]	5214	163	5015		Pseudomonas_phage(50.0%)	8	NA	NA
Escherichia_coli_MS_21-1	GG772616	GG772616 Escherichia coli MS 21-1 genomic scaffold Scfld135, whole genome shotgun sequence. [Escherichia coli MS 21-1]	6665	206	6663		Escherichia_phage(62.5%)	9	NA	NA
Escherichia_coli_MS_21-1	GG772715	GG772715 Escherichia coli MS 21-1 genomic scaffold Scfld503, whole genome shotgun sequence. [Escherichia coli MS 21-1]	29784	18884	26534		uncultured_Caudovirales_phage(66.67%)	8	NA	NA
Escherichia_coli_MS_21-1	GG772738	GG772738 Escherichia coli MS 21-1 genomic scaffold Scfld669, whole genome shotgun sequence. [Escherichia coli MS 21-1]	8495	3408	8304		Escherichia_phage(33.33%)	9	NA	NA
Escherichia_coli_MS_21-1	GG772612	GG772612 Escherichia coli MS 21-1 genomic scaffold Scfld129, whole genome shotgun sequence. [Escherichia coli MS 21-1]	13573	171	13543		Burkholderia_virus(64.29%)	16	NA	NA
Escherichia_coli_MS_21-1	GG772732	GG772732 Escherichia coli MS 21-1 genomic scaffold Scfld609, whole genome shotgun sequence. [Escherichia coli MS 21-1]	93296	84459	93122		Enterobacteria_phage(37.5%)	17	NA	NA
Escherichia_coli_MS_21-1	GG772762	GG772762 Escherichia coli MS 21-1 genomic scaffold Scfld792, whole genome shotgun sequence. [Escherichia coli MS 21-1]	104113	209	8125		Enterobacteria_phage(33.33%)	8	NA	NA
Escherichia_coli_MS_21-1	GG772762	GG772762 Escherichia coli MS 21-1 genomic scaffold Scfld792, whole genome shotgun sequence. [Escherichia coli MS 21-1]	104113	22312	31191	transposase	Salmonella_phage(33.33%)	8	NA	NA
Escherichia_coli_MS_21-1	GG772713	GG772713 Escherichia coli MS 21-1 genomic scaffold Scfld501, whole genome shotgun sequence. [Escherichia coli MS 21-1]	8778	51	8552		Escherichia_phage(50.0%)	13	NA	NA
Escherichia_coli_MS_21-1	GG772711	GG772711 Escherichia coli MS 21-1 genomic scaffold Scfld497, whole genome shotgun sequence. [Escherichia coli MS 21-1]	111315	103476	111026		Escherichia_phage(57.14%)	7	NA	NA
Escherichia_coli_MS_21-1	GG772737	GG772737 Escherichia coli MS 21-1 genomic scaffold Scfld667, whole genome shotgun sequence. [Escherichia coli MS 21-1]	226212	134790	145814		Sodalis_phage(14.29%)	11	NA	NA
Escherichia_coli_MS_21-1	GG772752	GG772752 Escherichia coli MS 21-1 genomic scaffold Scfld754, whole genome shotgun sequence. [Escherichia coli MS 21-1]	6402	38	6211		Enterobacteria_phage(63.64%)	11	NA	NA
Bifidobacterium_sp._12_1_47BFAA	GL622629	GL622629 Bifidobacterium sp. 12_1_47BFAA genomic scaffold supercont1.5, whole genome shotgun sequence. [Bifidobacterium sp. 12_1_47BFAA]	139368	107525	116140	tRNA,protease	Agrobacterium_phage(33.33%)	8	NA	NA
Bifidobacterium_sp._12_1_47BFAA	GL622630	GL622630 Bifidobacterium sp. 12_1_47BFAA genomic scaffold supercont1.6, whole genome shotgun sequence. [Bifidobacterium sp. 12_1_47BFAA]	131877	29184	39109		Mycobacterium_phage(28.57%)	10	NA	NA
Clostridium_sp._7_3_54FAA	JH376513	JH376513 Clostridium sp. 7_3_54FAA genomic scaffold supercont1.2, whole genome shotgun sequence. [Clostridium sp. 7_3_54FAA]	659113	424564	447464	protease	Erysipelothrix_phage(72.73%)	23	NA	NA
Clostridium_sp._7_3_54FAA	JH376513	JH376513 Clostridium sp. 7_3_54FAA genomic scaffold supercont1.2, whole genome shotgun sequence. [Clostridium sp. 7_3_54FAA]	659113	451844	465794		Erysipelothrix_phage(35.71%)	17	NA	NA
Clostridium_sp._7_3_54FAA	JH376517	JH376517 Clostridium sp. 7_3_54FAA genomic scaffold supercont1.6, whole genome shotgun sequence. [Clostridium sp. 7_3_54FAA]	430758	170795	182076		unidentified_phage(27.27%)	16	NA	NA
Clostridium_sp._7_3_54FAA	JH376517	JH376517 Clostridium sp. 7_3_54FAA genomic scaffold supercont1.6, whole genome shotgun sequence. [Clostridium sp. 7_3_54FAA]	430758	188018	200074	transposase	unidentified_phage(55.56%)	16	NA	NA
Clostridium_sp._7_3_54FAA	JH376516	JH376516 Clostridium sp. 7_3_54FAA genomic scaffold supercont1.5, whole genome shotgun sequence. [Clostridium sp. 7_3_54FAA]	459666	295700	303808		Cedratvirus(16.67%)	7	NA	NA
Clostridium_sp._7_3_54FAA	JH376512	JH376512 Clostridium sp. 7_3_54FAA genomic scaffold supercont1.1, whole genome shotgun sequence. [Clostridium sp. 7_3_54FAA]	990287	28147	55217		uncultured_Caudovirales_phage(37.5%)	39	NA	NA
Clostridium_sp._7_3_54FAA	JH376512	JH376512 Clostridium sp. 7_3_54FAA genomic scaffold supercont1.1, whole genome shotgun sequence. [Clostridium sp. 7_3_54FAA]	990287	374028	417305	protease	Streptococcus_phage(37.14%)	49	NA	NA
Clostridium_sp._7_3_54FAA	JH376512	JH376512 Clostridium sp. 7_3_54FAA genomic scaffold supercont1.1, whole genome shotgun sequence. [Clostridium sp. 7_3_54FAA]	990287	727460	739247		Streptococcus_phage(25.0%)	14	NA	NA
Clostridium_sp._7_3_54FAA	JH376528	JH376528 Clostridium sp. 7_3_54FAA genomic scaffold supercont1.17, whole genome shotgun sequence. [Clostridium sp. 7_3_54FAA]	85816	31018	83234	transposase,protease	Faecalibacterium_phage(84.13%)	65	NA	NA
Clostridium_sp._7_3_54FAA	JH376515	JH376515 Clostridium sp. 7_3_54FAA genomic scaffold supercont1.4, whole genome shotgun sequence. [Clostridium sp. 7_3_54FAA]	478497	60142	76490		Clostridium_phage(40.0%)	24	NA	NA
Clostridium_sp._7_3_54FAA	JH376515	JH376515 Clostridium sp. 7_3_54FAA genomic scaffold supercont1.4, whole genome shotgun sequence. [Clostridium sp. 7_3_54FAA]	478497	82368	92514		uncultured_Caudovirales_phage(42.86%)	16	NA	NA
Clostridium_sp._7_3_54FAA	JH376514	JH376514 Clostridium sp. 7_3_54FAA genomic scaffold supercont1.3, whole genome shotgun sequence. [Clostridium sp. 7_3_54FAA]	534692	16599	27112		Streptococcus_phage(28.57%)	7	NA	NA
Clostridium_sp._7_3_54FAA	JH376520	JH376520 Clostridium sp. 7_3_54FAA genomic scaffold supercont1.9, whole genome shotgun sequence. [Clostridium sp. 7_3_54FAA]	218489	130949	161719		uncultured_Caudovirales_phage(44.44%)	42	NA	NA
Helicobacter_canadensis_MIT_98-5491	DS990369	DS990369 Helicobacter canadensis MIT 98-5491 supercont2.2 genomic scaffold, whole genome shotgun sequence. [Helicobacter canadensis MIT 98-5491]	336553	263095	273037		Lactococcus_phage(16.67%)	9	NA	NA
Escherichia_coli_4_1_47FAA	JH594559	JH594559 Escherichia coli 4_1_47FAA genomic scaffold supercont1.7, whole genome shotgun sequence. [Escherichia coli 4_1_47FAA]	297081	17	36408	transposase	Enterobacteria_phage(48.65%)	43	NA	NA
Escherichia_coli_4_1_47FAA	JH594562	JH594562 Escherichia coli 4_1_47FAA genomic scaffold supercont1.10, whole genome shotgun sequence. [Escherichia coli 4_1_47FAA]	255391	53718	61462		Salmonella_phage(33.33%)	13	NA	NA
Escherichia_coli_4_1_47FAA	JH594562	JH594562 Escherichia coli 4_1_47FAA genomic scaffold supercont1.10, whole genome shotgun sequence. [Escherichia coli 4_1_47FAA]	255391	65305	92727	tail	Escherichia_phage(50.0%)	38	NA	NA
Escherichia_coli_4_1_47FAA	JH594577	JH594577 Escherichia coli 4_1_47FAA genomic scaffold supercont1.25, whole genome shotgun sequence. [Escherichia coli 4_1_47FAA]	31416	8537	31393		Enterobacteria_phage(27.27%)	27	NA	NA
Escherichia_coli_4_1_47FAA	JH594560	JH594560 Escherichia coli 4_1_47FAA genomic scaffold supercont1.8, whole genome shotgun sequence. [Escherichia coli 4_1_47FAA]	273201	300	17619		Escherichia_phage(35.0%)	22	NA	NA
Escherichia_coli_4_1_47FAA	JH594560	JH594560 Escherichia coli 4_1_47FAA genomic scaffold supercont1.8, whole genome shotgun sequence. [Escherichia coli 4_1_47FAA]	273201	202285	212341	tRNA	uncultured_virus(25.0%)	13	NA	NA
Escherichia_coli_4_1_47FAA	JH594575	JH594575 Escherichia coli 4_1_47FAA genomic scaffold supercont1.23, whole genome shotgun sequence. [Escherichia coli 4_1_47FAA]	40582	13997	39386	integrase	Shigella_phage(55.88%)	36	6982:6996	19070:19084
Escherichia_coli_4_1_47FAA	JH594563	JH594563 Escherichia coli 4_1_47FAA genomic scaffold supercont1.11, whole genome shotgun sequence. [Escherichia coli 4_1_47FAA]	247620	240829	247566		Enterobacteria_phage(75.0%)	11	NA	NA
Escherichia_coli_4_1_47FAA	JH594556	JH594556 Escherichia coli 4_1_47FAA genomic scaffold supercont1.4, whole genome shotgun sequence. [Escherichia coli 4_1_47FAA]	360821	1168	23523	transposase	Escherichia_phage(33.33%)	39	NA	NA
Escherichia_coli_4_1_47FAA	JH594556	JH594556 Escherichia coli 4_1_47FAA genomic scaffold supercont1.4, whole genome shotgun sequence. [Escherichia coli 4_1_47FAA]	360821	256488	266747	tRNA,protease	Aureococcus_anophage(16.67%)	8	NA	NA
Escherichia_coli_4_1_47FAA	JH594555	JH594555 Escherichia coli 4_1_47FAA genomic scaffold supercont1.3, whole genome shotgun sequence. [Escherichia coli 4_1_47FAA]	462292	78386	85741		Mycobacterium_phage(37.5%)	9	NA	NA
Escherichia_coli_4_1_47FAA	JH594567	JH594567 Escherichia coli 4_1_47FAA genomic scaffold supercont1.15, whole genome shotgun sequence. [Escherichia coli 4_1_47FAA]	114521	107491	113912	transposase	Stx2-converting_phage(57.14%)	10	NA	NA
Escherichia_coli_4_1_47FAA	JH594558	JH594558 Escherichia coli 4_1_47FAA genomic scaffold supercont1.6, whole genome shotgun sequence. [Escherichia coli 4_1_47FAA]	316867	78152	89343		Escherichia_phage(75.0%)	14	NA	NA
Escherichia_coli_4_1_47FAA	JH594558	JH594558 Escherichia coli 4_1_47FAA genomic scaffold supercont1.6, whole genome shotgun sequence. [Escherichia coli 4_1_47FAA]	316867	209199	220015		Hokovirus(14.29%)	12	NA	NA
Escherichia_coli_4_1_47FAA	JH594569	JH594569 Escherichia coli 4_1_47FAA genomic scaffold supercont1.17, whole genome shotgun sequence. [Escherichia coli 4_1_47FAA]	108977	71806	80152	transposase	Escherichia_phage(25.0%)	14	NA	NA
Escherichia_coli_4_1_47FAA	JH594554	JH594554 Escherichia coli 4_1_47FAA genomic scaffold supercont1.2, whole genome shotgun sequence. [Escherichia coli 4_1_47FAA]	514192	73	11998		Enterobacteria_phage(50.0%)	19	NA	NA
Escherichia_coli_4_1_47FAA	JH594554	JH594554 Escherichia coli 4_1_47FAA genomic scaffold supercont1.2, whole genome shotgun sequence. [Escherichia coli 4_1_47FAA]	514192	476229	488769		Burkholderia_virus(46.67%)	17	NA	NA
Escherichia_coli_4_1_47FAA	JH594572	JH594572 Escherichia coli 4_1_47FAA genomic scaffold supercont1.20, whole genome shotgun sequence. [Escherichia coli 4_1_47FAA]	75722	67408	75187		Bradyrhizobium_phage(16.67%)	9	NA	NA
Succinatimonas_hippei_YIT_12066	GL831013	GL831013 Succinatimonas hippei YIT 12066 genomic scaffold Scfld180, whole genome shotgun sequence. [Succinatimonas hippei YIT 12066]	23155	8964	19026		Prochlorococcus_phage(16.67%)	7	NA	NA
Succinatimonas_hippei_YIT_12066	GL831058	GL831058 Succinatimonas hippei YIT 12066 genomic scaffold Scfld448, whole genome shotgun sequence. [Succinatimonas hippei YIT 12066]	82815	45561	55049		Acidithiobacillus_phage(16.67%)	8	NA	NA
Succinatimonas_hippei_YIT_12066	GL831043	GL831043 Succinatimonas hippei YIT 12066 genomic scaffold Scfld323, whole genome shotgun sequence. [Succinatimonas hippei YIT 12066]	40099	9112	19105		Dickeya_phage(14.29%)	11	NA	NA
Succinatimonas_hippei_YIT_12066	GL831047	GL831047 Succinatimonas hippei YIT 12066 genomic scaffold Scfld344, whole genome shotgun sequence. [Succinatimonas hippei YIT 12066]	84829	28236	35554	tRNA	Pontimonas_phage(16.67%)	8	NA	NA
Succinatimonas_hippei_YIT_12066	GL830988	GL830988 Succinatimonas hippei YIT 12066 genomic scaffold Scfld120, whole genome shotgun sequence. [Succinatimonas hippei YIT 12066]	67562	22851	31491	protease	Vibrio_phage(14.29%)	9	NA	NA
Fusobacterium_nucleatum_subsp._animalis_D11	EQ999809	EQ999809 Fusobacterium sp. D11 genomic scaffold supercont1.8, whole genome shotgun sequence. [Fusobacterium nucleatum subsp. animalis D11]	90740	55386	87426	transposase	Fusobacterium_phage(23.33%)	47	NA	NA
Fusobacterium_nucleatum_subsp._animalis_D11	EQ999803	EQ999803 Fusobacterium sp. D11 genomic scaffold supercont1.2, whole genome shotgun sequence. [Fusobacterium nucleatum subsp. animalis D11]	264328	209091	256094	protease	Fusobacterium_phage(91.53%)	72	NA	NA
Fusobacterium_nucleatum_subsp._animalis_D11	EQ999821	EQ999821 Fusobacterium sp. D11 genomic scaffold supercont1.20, whole genome shotgun sequence. [Fusobacterium nucleatum subsp. animalis D11]	40647	18488	28329		Tupanvirus(16.67%)	9	NA	NA
Dorea_formicigenerans_4_6_53AFAA	JH126490	JH126490 Dorea formicigenerans 4_6_53AFAA genomic scaffold supercont1.4, whole genome shotgun sequence. [Dorea formicigenerans 4_6_53AFAA]	191658	19412	29910	tRNA	Tupanvirus(16.67%)	7	NA	NA
Dorea_formicigenerans_4_6_53AFAA	JH126525	JH126525 Dorea formicigenerans 4_6_53AFAA genomic scaffold supercont1.39, whole genome shotgun sequence. [Dorea formicigenerans 4_6_53AFAA]	12325	1210	9019	transposase	Bacillus_phage(33.33%)	10	NA	NA
Dorea_formicigenerans_4_6_53AFAA	JH126489	JH126489 Dorea formicigenerans 4_6_53AFAA genomic scaffold supercont1.3, whole genome shotgun sequence. [Dorea formicigenerans 4_6_53AFAA]	231363	212349	226935		Streptococcus_phage(91.67%)	17	NA	NA
Dorea_formicigenerans_4_6_53AFAA	JH126507	JH126507 Dorea formicigenerans 4_6_53AFAA genomic scaffold supercont1.21, whole genome shotgun sequence. [Dorea formicigenerans 4_6_53AFAA]	67432	37459	44242	transposase	Bacillus_phage(50.0%)	11	NA	NA
Dorea_formicigenerans_4_6_53AFAA	JH126515	JH126515 Dorea formicigenerans 4_6_53AFAA genomic scaffold supercont1.29, whole genome shotgun sequence. [Dorea formicigenerans 4_6_53AFAA]	27605	8146	15222	transposase	Leptospira_phage(33.33%)	10	NA	NA
Dorea_formicigenerans_4_6_53AFAA	JH126502	JH126502 Dorea formicigenerans 4_6_53AFAA genomic scaffold supercont1.16, whole genome shotgun sequence. [Dorea formicigenerans 4_6_53AFAA]	110821	3674	8579		Streptococcus_phage(85.71%)	9	NA	NA
Dorea_formicigenerans_4_6_53AFAA	JH126497	JH126497 Dorea formicigenerans 4_6_53AFAA genomic scaffold supercont1.11, whole genome shotgun sequence. [Dorea formicigenerans 4_6_53AFAA]	123448	24867	44859		Streptococcus_phage(87.5%)	28	NA	NA
Dorea_formicigenerans_4_6_53AFAA	JH126497	JH126497 Dorea formicigenerans 4_6_53AFAA genomic scaffold supercont1.11, whole genome shotgun sequence. [Dorea formicigenerans 4_6_53AFAA]	123448	108847	123153		Faecalibacterium_phage(30.0%)	17	NA	NA
Dorea_formicigenerans_4_6_53AFAA	JH126491	JH126491 Dorea formicigenerans 4_6_53AFAA genomic scaffold supercont1.5, whole genome shotgun sequence. [Dorea formicigenerans 4_6_53AFAA]	184381	62849	79209		Streptococcus_phage(92.31%)	23	NA	NA
Helicobacter_pylori_GAM246Ai	KB636280	KB636280 Helicobacter pylori GAM246Ai genomic scaffold Scfld373, whole genome shotgun sequence. [Helicobacter pylori GAM246Ai]	137707	97265	105593	tRNA	Synechococcus_phage(33.33%)	7	NA	NA
Helicobacter_pylori_GAM246Ai	KB636258	KB636258 Helicobacter pylori GAM246Ai genomic scaffold Scfld14, whole genome shotgun sequence. [Helicobacter pylori GAM246Ai]	5420	175	4503		Escherichia_phage(100.0%)	6	NA	NA
Helicobacter_pylori_GAM246Ai	KB636290	KB636290 Helicobacter pylori GAM246Ai genomic scaffold Scfld89, whole genome shotgun sequence. [Helicobacter pylori GAM246Ai]	102294	27657	38598		uncultured_virus(16.67%)	10	NA	NA
Campylobacter_upsaliensis_JV21	GL622227	GL622227 Campylobacter upsaliensis JV21 genomic scaffold SCAFFOLD1, whole genome shotgun sequence. [Campylobacter upsaliensis JV21]	1566917	1318153	1325616		Synechococcus_phage(33.33%)	10	NA	NA
Campylobacter_upsaliensis_JV21	GL622227	GL622227 Campylobacter upsaliensis JV21 genomic scaffold SCAFFOLD1, whole genome shotgun sequence. [Campylobacter upsaliensis JV21]	1566917	1328902	1336411		Synechococcus_phage(33.33%)	8	NA	NA
Enterococcus_faecium_TX1330	GG669057	GG669057 Enterococcus faecium TX1330 genomic scaffold SCAFFOLD1, whole genome shotgun sequence. [Enterococcus faecium TX1330]	1266777	152750	161789		Gordonia_phage(16.67%)	9	NA	NA
Enterococcus_faecium_TX1330	GG669057	GG669057 Enterococcus faecium TX1330 genomic scaffold SCAFFOLD1, whole genome shotgun sequence. [Enterococcus faecium TX1330]	1266777	714323	747030		Bacillus_phage(22.58%)	45	NA	NA
Enterococcus_faecium_TX1330	GG669059	GG669059 Enterococcus faecium TX1330 genomic scaffold SCAFFOLD3, whole genome shotgun sequence. [Enterococcus faecium TX1330]	174673	14378	23656	transposase	Bacillus_phage(66.67%)	10	NA	NA
Enterococcus_faecium_TX1330	GG669062	GG669062 Enterococcus faecium TX1330 genomic scaffold SCAFFOLD6, whole genome shotgun sequence. [Enterococcus faecium TX1330]	261102	54193	62926		Streptococcus_phage(71.43%)	11	NA	NA
Enterococcus_faecium_PC4.1	ADMM01000075	ADMM01000075 Enterococcus faecium PC4.1 contig00043, whole genome shotgun sequence. [Enterococcus faecium PC4.1]	34250	4686	17130		Streptococcus_phage(55.56%)	13	NA	NA
Enterococcus_faecium_PC4.1	ADMM01000006	ADMM01000006 Enterococcus faecium PC4.1 contig00009, whole genome shotgun sequence. [Enterococcus faecium PC4.1]	13032	5172	10609	transposase	Enterococcus_phage(83.33%)	11	NA	NA
Enterococcus_faecium_PC4.1	ADMM01000001	ADMM01000001 Enterococcus faecium PC4.1 contig00042, whole genome shotgun sequence. [Enterococcus faecium PC4.1]	45319	12183	21223		Synechococcus_phage(16.67%)	9	NA	NA
Ruminococcus_torques_ATCC_27756	DS264345	DS264345 Ruminococcus torques ATCC 27756 Scfld022 genomic scaffold, whole genome shotgun sequence. [Ruminococcus torques ATCC 27756]	710081	399470	439981	protease	Streptococcus_phage(38.24%)	50	NA	NA
Ruminococcus_torques_ATCC_27756	DS264344	DS264344 Ruminococcus torques ATCC 27756 Scfld021 genomic scaffold, whole genome shotgun sequence. [Ruminococcus torques ATCC 27756]	223398	25632	36454	transposase,protease	Only_Syngen_Nebraska_virus(16.67%)	8	NA	NA
Ruminococcus_torques_ATCC_27756	DS264349	DS264349 Ruminococcus torques ATCC 27756 Scfld026 genomic scaffold, whole genome shotgun sequence. [Ruminococcus torques ATCC 27756]	165245	77356	92430	transposase	Arthrobacter_phage(30.0%)	20	NA	NA
Ruminococcus_torques_ATCC_27756	DS264349	DS264349 Ruminococcus torques ATCC 27756 Scfld026 genomic scaffold, whole genome shotgun sequence. [Ruminococcus torques ATCC 27756]	165245	109313	132659		uncultured_Caudovirales_phage(11.11%)	35	NA	NA
Ruminococcus_torques_ATCC_27756	DS264358	DS264358 Ruminococcus torques ATCC 27756 Scfld0215 genomic scaffold, whole genome shotgun sequence. [Ruminococcus torques ATCC 27756]	209206	167665	197635		Faecalibacterium_phage(23.08%)	31	NA	NA
Bifidobacterium_longum_subsp._longum_2-2B	AJTJ01000115	AJTJ01000115 Bifidobacterium longum subsp. longum 2-2B ctg7180000000389, whole genome shotgun sequence. [Bifidobacterium longum subsp. longum 2-2B]	41475	9645	23376		Propionibacterium_phage(38.46%)	20	NA	NA
Enterococcus_faecalis_PC1.1	ADKN01000045	ADKN01000045 Enterococcus faecalis PC1.1 contig00057, whole genome shotgun sequence. [Enterococcus faecalis PC1.1]	121842	5984	25262	protease	Enterococcus_phage(30.0%)	22	NA	NA
Enterococcus_faecalis_PC1.1	ADKN01000045	ADKN01000045 Enterococcus faecalis PC1.1 contig00057, whole genome shotgun sequence. [Enterococcus faecalis PC1.1]	121842	29114	41497		Enterococcus_phage(52.94%)	22	NA	NA
Enterococcus_faecalis_PC1.1	ADKN01000005	ADKN01000005 Enterococcus faecalis PC1.1 contig00078, whole genome shotgun sequence. [Enterococcus faecalis PC1.1]	20502	9006	17650		Synechococcus_phage(50.0%)	9	NA	NA
Enterococcus_faecalis_PC1.1	ADKN01000068	ADKN01000068 Enterococcus faecalis PC1.1 contig00038, whole genome shotgun sequence. [Enterococcus faecalis PC1.1]	85477	77495	85275	transposase	Planktothrix_phage(33.33%)	11	NA	NA
Enterococcus_faecalis_PC1.1	ADKN01000026	ADKN01000026 Enterococcus faecalis PC1.1 contig00069, whole genome shotgun sequence. [Enterococcus faecalis PC1.1]	38515	15505	26418		Streptococcus_phage(50.0%)	12	NA	NA
Enterococcus_faecalis_PC1.1	ADKN01000053	ADKN01000053 Enterococcus faecalis PC1.1 contig00030, whole genome shotgun sequence. [Enterococcus faecalis PC1.1]	132489	110500	117211		Enterococcus_phage(33.33%)	7	NA	NA
Enterococcus_faecalis_PC1.1	ADKN01000041	ADKN01000041 Enterococcus faecalis PC1.1 contig00048, whole genome shotgun sequence. [Enterococcus faecalis PC1.1]	35134	18155	33452		Enterococcus_phage(27.27%)	18	NA	NA
Coprococcus_sp._HPP0048	KE150441	KE150441 Coprococcus sp. HPP0048 genomic scaffold aczIq-supercont1.1, whole genome shotgun sequence. [Coprococcus sp. HPP0048]	1615525	79083	92316		Escherichia_phage(22.22%)	13	NA	NA
Coprococcus_sp._HPP0048	KE150441	KE150441 Coprococcus sp. HPP0048 genomic scaffold aczIq-supercont1.1, whole genome shotgun sequence. [Coprococcus sp. HPP0048]	1615525	109112	128778		Streptococcus_phage(76.47%)	22	NA	NA
Coprococcus_sp._HPP0048	KE150441	KE150441 Coprococcus sp. HPP0048 genomic scaffold aczIq-supercont1.1, whole genome shotgun sequence. [Coprococcus sp. HPP0048]	1615525	505524	535357		Clostridium_phage(17.39%)	45	NA	NA
Coprococcus_sp._HPP0048	KE150441	KE150441 Coprococcus sp. HPP0048 genomic scaffold aczIq-supercont1.1, whole genome shotgun sequence. [Coprococcus sp. HPP0048]	1615525	657308	672999		Streptococcus_phage(91.67%)	17	NA	NA
Coprococcus_sp._HPP0048	KE150441	KE150441 Coprococcus sp. HPP0048 genomic scaffold aczIq-supercont1.1, whole genome shotgun sequence. [Coprococcus sp. HPP0048]	1615525	1580897	1590551	tRNA,holin	Bacillus_phage(50.0%)	8	NA	NA
Coprococcus_sp._HPP0048	KE150442	KE150442 Coprococcus sp. HPP0048 genomic scaffold aczIq-supercont1.2, whole genome shotgun sequence. [Coprococcus sp. HPP0048]	590794	130316	155498		Streptococcus_phage(45.45%)	40	NA	NA
Coprococcus_sp._HPP0048	KE150442	KE150442 Coprococcus sp. HPP0048 genomic scaffold aczIq-supercont1.2, whole genome shotgun sequence. [Coprococcus sp. HPP0048]	590794	185553	197175		Clostridium_phage(37.5%)	13	NA	NA
Bacteroides_sp._2_1_22	GG705175	GG705175 Bacteroides sp. 2_1_22 genomic scaffold supercont1.3, whole genome shotgun sequence. [Bacteroides sp. 2_1_22]	1143623	719980	748478		Cellulophaga_phage(15.79%)	34	NA	NA
Bacteroides_sp._2_1_22	GG705178	GG705178 Bacteroides sp. 2_1_22 genomic scaffold supercont1.6, whole genome shotgun sequence. [Bacteroides sp. 2_1_22]	358878	343000	348047		Erwinia_phage(16.67%)	7	NA	NA
Bacteroides_sp._3_1_23	GG774949	GG774949 Bacteroides sp. 3_1_23 genomic scaffold supercont1.1, whole genome shotgun sequence. [Bacteroides sp. 3_1_23]	3021873	1681719	1702632		unidentified_phage(66.67%)	26	NA	NA
Lachnospiraceae_bacterium_6_1_63FAA	GL890553	GL890553 Lachnospiraceae bacterium 6_1_63FAA genomic scaffold supercont1.6, whole genome shotgun sequence. [Lachnospiraceae bacterium 6_1_63FAA]	192008	165219	173373	transposase	Streptococcus_phage(42.86%)	14	NA	NA
Lachnospiraceae_bacterium_6_1_63FAA	GL890552	GL890552 Lachnospiraceae bacterium 6_1_63FAA genomic scaffold supercont1.5, whole genome shotgun sequence. [Lachnospiraceae bacterium 6_1_63FAA]	235850	102342	111405		Bacillus_phage(33.33%)	8	NA	NA
Lachnospiraceae_bacterium_6_1_63FAA	GL890549	GL890549 Lachnospiraceae bacterium 6_1_63FAA genomic scaffold supercont1.2, whole genome shotgun sequence. [Lachnospiraceae bacterium 6_1_63FAA]	443929	75743	83671	protease	Planktothrix_phage(33.33%)	7	NA	NA
Lachnospiraceae_bacterium_6_1_63FAA	GL890549	GL890549 Lachnospiraceae bacterium 6_1_63FAA genomic scaffold supercont1.2, whole genome shotgun sequence. [Lachnospiraceae bacterium 6_1_63FAA]	443929	253396	260526		Staphylococcus_phage(16.67%)	11	NA	NA
Lachnospiraceae_bacterium_6_1_63FAA	GL890548	GL890548 Lachnospiraceae bacterium 6_1_63FAA genomic scaffold supercont1.1, whole genome shotgun sequence. [Lachnospiraceae bacterium 6_1_63FAA]	535738	144354	155203		Lactobacillus_phage(36.36%)	14	NA	NA
Lachnospiraceae_bacterium_6_1_63FAA	GL890551	GL890551 Lachnospiraceae bacterium 6_1_63FAA genomic scaffold supercont1.4, whole genome shotgun sequence. [Lachnospiraceae bacterium 6_1_63FAA]	331894	147646	160122	transposase	Streptococcus_phage(33.33%)	12	NA	NA
Lachnospiraceae_bacterium_6_1_63FAA	GL890554	GL890554 Lachnospiraceae bacterium 6_1_63FAA genomic scaffold supercont1.7, whole genome shotgun sequence. [Lachnospiraceae bacterium 6_1_63FAA]	145063	654	12376	tRNA	Bacillus_phage(42.86%)	11	NA	NA
Lachnospiraceae_bacterium_3_1_57FAA_CT1	KE150405	KE150405 Lachnospiraceae bacterium 3_1_57FAA_CT1 genomic scaffold acsNU-supercont1.1, whole genome shotgun sequence. [Lachnospiraceae bacterium 3_1_57FAA_CT1]	4263893	3328351	3336734		uncultured_Mediterranean_phage(16.67%)	7	NA	NA
Lachnospiraceae_bacterium_3_1_57FAA_CT1	KE150405	KE150405 Lachnospiraceae bacterium 3_1_57FAA_CT1 genomic scaffold acsNU-supercont1.1, whole genome shotgun sequence. [Lachnospiraceae bacterium 3_1_57FAA_CT1]	4263893	4153315	4175636	tRNA	Streptococcus_phage(73.68%)	23	NA	NA
Lachnospiraceae_bacterium_3_1_57FAA_CT1	KE150409	KE150409 Lachnospiraceae bacterium 3_1_57FAA_CT1 genomic scaffold acsNU-supercont1.5, whole genome shotgun sequence. [Lachnospiraceae bacterium 3_1_57FAA_CT1]	184717	306	6337	transposase	Streptococcus_phage(50.0%)	8	NA	NA
Fusobacterium_nucleatum_subsp._animalis_21_1A	CM002368	CM002368 Fusobacterium nucleatum subsp. animalis 21_1A chromosome, whole genome shotgun sequence. [Fusobacterium nucleatum subsp. animalis 21_1A]	2154007	863014	908240	protease	Fusobacterium_phage(94.83%)	74	NA	NA
Fusobacterium_nucleatum_subsp._animalis_21_1A	CM002368	CM002368 Fusobacterium nucleatum subsp. animalis 21_1A chromosome, whole genome shotgun sequence. [Fusobacterium nucleatum subsp. animalis 21_1A]	2154007	1341583	1348565		Synechococcus_phage(33.33%)	6	NA	NA
Fusobacterium_nucleatum_subsp._animalis_21_1A	ADEE02000002	ADEE02000002 Fusobacterium nucleatum subsp. animalis 21_1A cont3.2, whole genome shotgun sequence. [Fusobacterium nucleatum subsp. animalis 21_1A]	1755614	464721	509947	protease	Fusobacterium_phage(93.22%)	74	NA	NA
Fusobacterium_nucleatum_subsp._animalis_21_1A	ADEE02000002	ADEE02000002 Fusobacterium nucleatum subsp. animalis 21_1A cont3.2, whole genome shotgun sequence. [Fusobacterium nucleatum subsp. animalis 21_1A]	1755614	943290	954021		Synechococcus_phage(28.57%)	7	NA	NA
Dorea_formicigenerans_ATCC_27755	AAXA02000006	AAXA02000006 Dorea formicigenerans ATCC 27755 D_formicigenerans-3.0.1_Cont394, whole genome shotgun sequence. [Dorea formicigenerans ATCC 27755]	106634	64357	74325	protease	Staphylococcus_phage(50.0%)	8	NA	NA
Dorea_formicigenerans_ATCC_27755	AAXA02000008	AAXA02000008 Dorea formicigenerans ATCC 27755 D_formicigenerans-3.0.1_Cont395, whole genome shotgun sequence. [Dorea formicigenerans ATCC 27755]	93858	50465	57267		unidentified_phage(33.33%)	10	NA	NA
Dorea_formicigenerans_ATCC_27755	AAXA02000015	AAXA02000015 Dorea formicigenerans ATCC 27755 D_formicigenerans-3.0.1_Cont399, whole genome shotgun sequence. [Dorea formicigenerans ATCC 27755]	957115	581330	595421		Streptococcus_phage(100.0%)	17	NA	NA
Dorea_formicigenerans_ATCC_27755	AAXA02000015	AAXA02000015 Dorea formicigenerans ATCC 27755 D_formicigenerans-3.0.1_Cont399, whole genome shotgun sequence. [Dorea formicigenerans ATCC 27755]	957115	900890	913691		Streptococcus_phage(100.0%)	15	NA	NA
Dorea_formicigenerans_ATCC_27755	AAXA02000002	AAXA02000002 Dorea formicigenerans ATCC 27755 D_formicigenerans-3.0.1_Cont21.1, whole genome shotgun sequence. [Dorea formicigenerans ATCC 27755]	27753	1307	7111		Clostridium_phage(33.33%)	7	NA	NA
Dorea_formicigenerans_ATCC_27755	AAXA02000010	AAXA02000010 Dorea formicigenerans ATCC 27755 D_formicigenerans-3.0.1_Cont150, whole genome shotgun sequence. [Dorea formicigenerans ATCC 27755]	230467	88535	99033	tRNA	Tupanvirus(16.67%)	7	NA	NA
Dorea_formicigenerans_ATCC_27755	AAXA02000009	AAXA02000009 Dorea formicigenerans ATCC 27755 D_formicigenerans-3.0.1_Cont328, whole genome shotgun sequence. [Dorea formicigenerans ATCC 27755]	212918	200663	209161		Faecalibacterium_phage(50.0%)	13	NA	NA
Mitsuokella_multacida_DSM_20544	GG697141	GG697141 Mitsuokella multacida DSM 20544 genomic scaffold Scfld0, whole genome shotgun sequence. [Mitsuokella multacida DSM 20544]	1483428	70751	83630		Bacillus_phage(20.0%)	18	NA	NA
Mitsuokella_multacida_DSM_20544	GG697141	GG697141 Mitsuokella multacida DSM 20544 genomic scaffold Scfld0, whole genome shotgun sequence. [Mitsuokella multacida DSM 20544]	1483428	104875	113209		Pseudoalteromonas_phage(16.67%)	12	NA	NA
Mitsuokella_multacida_DSM_20544	GG697141	GG697141 Mitsuokella multacida DSM 20544 genomic scaffold Scfld0, whole genome shotgun sequence. [Mitsuokella multacida DSM 20544]	1483428	1321405	1330703		Bacillus_phage(66.67%)	8	NA	NA
Mitsuokella_multacida_DSM_20544	GG697142	GG697142 Mitsuokella multacida DSM 20544 genomic scaffold Scfld1, whole genome shotgun sequence. [Mitsuokella multacida DSM 20544]	797415	568317	574376		Mollivirus(33.33%)	6	NA	NA
Streptococcus_sp._HPH0090	KE150465	KE150465 Streptococcus sp. HPH0090 genomic scaffold aczIp-supercont1.2, whole genome shotgun sequence. [Streptococcus sp. HPH0090]	379911	40032	45729		Streptococcus_phage(66.67%)	6	NA	NA
Streptococcus_sp._HPH0090	KE150465	KE150465 Streptococcus sp. HPH0090 genomic scaffold aczIp-supercont1.2, whole genome shotgun sequence. [Streptococcus sp. HPH0090]	379911	127271	133587		Anomala_cuprea_entomopoxvirus(16.67%)	11	NA	NA
Streptococcus_sp._HPH0090	KE150465	KE150465 Streptococcus sp. HPH0090 genomic scaffold aczIp-supercont1.2, whole genome shotgun sequence. [Streptococcus sp. HPH0090]	379911	351027	361837		Synechococcus_phage(33.33%)	7	NA	NA
Streptococcus_sp._HPH0090	KE150466	KE150466 Streptococcus sp. HPH0090 genomic scaffold aczIp-supercont1.3, whole genome shotgun sequence. [Streptococcus sp. HPH0090]	139940	99667	108421		Streptococcus_phage(33.33%)	9	NA	NA
Streptococcus_sp._HPH0090	KE150464	KE150464 Streptococcus sp. HPH0090 genomic scaffold aczIp-supercont1.1, whole genome shotgun sequence. [Streptococcus sp. HPH0090]	1179760	194620	201871	tRNA	Streptococcus_phage(42.86%)	10	NA	NA
Streptococcus_sp._HPH0090	KE150464	KE150464 Streptococcus sp. HPH0090 genomic scaffold aczIp-supercont1.1, whole genome shotgun sequence. [Streptococcus sp. HPH0090]	1179760	313282	320154		Streptococcus_phage(66.67%)	7	NA	NA
Streptococcus_sp._HPH0090	KE150464	KE150464 Streptococcus sp. HPH0090 genomic scaffold aczIp-supercont1.1, whole genome shotgun sequence. [Streptococcus sp. HPH0090]	1179760	515718	526139		Streptococcus_phage(75.0%)	11	NA	NA
Streptococcus_sp._HPH0090	KE150464	KE150464 Streptococcus sp. HPH0090 genomic scaffold aczIp-supercont1.1, whole genome shotgun sequence. [Streptococcus sp. HPH0090]	1179760	896916	906243	protease	Streptococcus_phage(42.86%)	11	NA	NA
Helicobacter_pylori_GAM42Ai	KB642133	KB642133 Helicobacter pylori GAM42Ai genomic scaffold Scfld121, whole genome shotgun sequence. [Helicobacter pylori GAM42Ai]	102425	63926	74925		uncultured_Caudovirales_phage(33.33%)	9	NA	NA
Helicobacter_pylori_GAM42Ai	KB642152	KB642152 Helicobacter pylori GAM42Ai genomic scaffold Scfld244, whole genome shotgun sequence. [Helicobacter pylori GAM42Ai]	146575	110994	115735		Helicobacter_phage(75.0%)	8	NA	NA
Helicobacter_pylori_GAM42Ai	KB642158	KB642158 Helicobacter pylori GAM42Ai genomic scaffold Scfld31, whole genome shotgun sequence. [Helicobacter pylori GAM42Ai]	5416	8	5358		Escherichia_phage(100.0%)	7	NA	NA
Helicobacter_pylori_HP260BFii	KB635883	KB635883 Helicobacter pylori HP260BFii genomic scaffold Scfld16, whole genome shotgun sequence. [Helicobacter pylori HP260BFii]	5420	71	5277		Escherichia_phage(100.0%)	7	NA	NA
Helicobacter_pylori_HP260BFii	KB635881	KB635881 Helicobacter pylori HP260BFii genomic scaffold Scfld147, whole genome shotgun sequence. [Helicobacter pylori HP260BFii]	50732	24045	30413		Klosneuvirus(16.67%)	9	NA	NA
Helicobacter_pylori_HP260BFii	KB635869	KB635869 Helicobacter pylori HP260BFii genomic scaffold Scfld1, whole genome shotgun sequence. [Helicobacter pylori HP260BFii]	59886	21454	32405		uncultured_Caudovirales_phage(33.33%)	9	NA	NA
Bacteroides_sp._4_1_36	GL622501	GL622501 Bacteroides sp. 4_1_36 genomic scaffold supercont1.2, whole genome shotgun sequence. [Bacteroides sp. 4_1_36]	553429	249671	259957		Bodo_saltans_virus(16.67%)	7	NA	NA
Escherichia_coli_MS_196-1	GG774012	GG774012 Escherichia coli MS 196-1 genomic scaffold Scfld870, whole genome shotgun sequence. [Escherichia coli MS 196-1]	167280	126202	136163	tRNA,protease	Dickeya_phage(16.67%)	8	NA	NA
Escherichia_coli_MS_196-1	GG774041	GG774041 Escherichia coli MS 196-1 genomic scaffold Scfld1040, whole genome shotgun sequence. [Escherichia coli MS 196-1]	102804	94625	102164		Enterobacteria_phage(71.43%)	7	NA	NA
Escherichia_coli_MS_196-1	GG773927	GG773927 Escherichia coli MS 196-1 genomic scaffold Scfld309, whole genome shotgun sequence. [Escherichia coli MS 196-1]	16743	436	16530		Escherichia_phage(40.74%)	30	NA	NA
Escherichia_coli_MS_196-1	GG774146	GG774146 Escherichia coli MS 196-1 genomic scaffold Scfld1811, whole genome shotgun sequence. [Escherichia coli MS 196-1]	22784	234	16233		Escherichia_phage(58.33%)	30	NA	NA
Escherichia_coli_MS_196-1	GG774062	GG774062 Escherichia coli MS 196-1 genomic scaffold Scfld1133, whole genome shotgun sequence. [Escherichia coli MS 196-1]	45863	6210	19393		Escherichia_phage(50.0%)	12	NA	NA
Escherichia_coli_MS_196-1	GG774036	GG774036 Escherichia coli MS 196-1 genomic scaffold Scfld1010, whole genome shotgun sequence. [Escherichia coli MS 196-1]	4254	80	4155		Escherichia_phage(44.44%)	9	NA	NA
Escherichia_coli_MS_196-1	GG773920	GG773920 Escherichia coli MS 196-1 genomic scaffold Scfld279, whole genome shotgun sequence. [Escherichia coli MS 196-1]	9678	240	9238		Escherichia_phage(50.0%)	12	NA	NA
Escherichia_coli_MS_196-1	GG773932	GG773932 Escherichia coli MS 196-1 genomic scaffold Scfld334, whole genome shotgun sequence. [Escherichia coli MS 196-1]	11743	104	11714		Enterobacteria_phage(35.0%)	23	NA	NA
Escherichia_coli_MS_196-1	GG773989	GG773989 Escherichia coli MS 196-1 genomic scaffold Scfld751, whole genome shotgun sequence. [Escherichia coli MS 196-1]	26068	281	14296	integrase	Escherichia_phage(38.89%)	18	6109:6122	11882:11895
Escherichia_coli_MS_196-1	GG773895	GG773895 Escherichia coli MS 196-1 genomic scaffold Scfld121, whole genome shotgun sequence. [Escherichia coli MS 196-1]	8415	251	8400		Escherichia_phage(84.62%)	15	NA	NA
Escherichia_coli_MS_196-1	GG773986	GG773986 Escherichia coli MS 196-1 genomic scaffold Scfld735, whole genome shotgun sequence. [Escherichia coli MS 196-1]	79103	61076	71180	tRNA	Brazilian_cedratvirus(14.29%)	12	NA	NA
Escherichia_coli_MS_196-1	GG774165	GG774165 Escherichia coli MS 196-1 genomic scaffold Scfld2016, whole genome shotgun sequence. [Escherichia coli MS 196-1]	5626	309	4884	protease	Enterobacteria_phage(37.5%)	9	NA	NA
Escherichia_coli_MS_196-1	GG773906	GG773906 Escherichia coli MS 196-1 genomic scaffold Scfld189, whole genome shotgun sequence. [Escherichia coli MS 196-1]	13815	132	13589		Enterobacteria_phage(66.67%)	22	NA	NA
Escherichia_coli_MS_196-1	GG774093	GG774093 Escherichia coli MS 196-1 genomic scaffold Scfld1388, whole genome shotgun sequence. [Escherichia coli MS 196-1]	156532	48273	62875		Salmonella_phage(33.33%)	13	NA	NA
Helicobacter_pylori_GAM260Bi	KB636855	KB636855 Helicobacter pylori GAM260Bi genomic scaffold Scfld31, whole genome shotgun sequence. [Helicobacter pylori GAM260Bi]	5418	38	5388		Escherichia_phage(100.0%)	8	NA	NA
Helicobacter_pylori_GAM260Bi	KB636850	KB636850 Helicobacter pylori GAM260Bi genomic scaffold Scfld25, whole genome shotgun sequence. [Helicobacter pylori GAM260Bi]	47987	30629	47788		Helicobacter_phage(91.67%)	24	NA	NA
Clostridium_sp._M62_1	GG730309	GG730309 Clostridium sp. M62/1 genomic scaffold Scfld0, whole genome shotgun sequence. [Clostridium sp. M62/1]	947737	142890	159394		Staphylococcus_phage(33.33%)	19	NA	NA
Clostridium_sp._M62_1	GG730309	GG730309 Clostridium sp. M62/1 genomic scaffold Scfld0, whole genome shotgun sequence. [Clostridium sp. M62/1]	947737	656146	666544		Enterobacteria_phage(40.0%)	12	NA	NA
Clostridium_sp._M62_1	GG730311	GG730311 Clostridium sp. M62/1 genomic scaffold Scfld2, whole genome shotgun sequence. [Clostridium sp. M62/1]	463016	120433	168654	transposase	Faecalibacterium_phage(80.95%)	68	NA	NA
Clostridium_sp._M62_1	GG730317	GG730317 Clostridium sp. M62/1 genomic scaffold Scfld8, whole genome shotgun sequence. [Clostridium sp. M62/1]	151124	48117	57772		Bacillus_phage(50.0%)	7	NA	NA
Clostridium_sp._M62_1	GG730318	GG730318 Clostridium sp. M62/1 genomic scaffold Scfld9, whole genome shotgun sequence. [Clostridium sp. M62/1]	123487	101240	107537		Enterobacteria_phage(50.0%)	6	NA	NA
Clostridium_sp._M62_1	GG730315	GG730315 Clostridium sp. M62/1 genomic scaffold Scfld6, whole genome shotgun sequence. [Clostridium sp. M62/1]	205520	16099	70223	transposase,protease	Faecalibacterium_phage(76.92%)	67	NA	NA
Fusobacterium_nucleatum_subsp._vincentii_4_1_13	GG657999	GG657999 Fusobacterium sp. 4_1_13 genomic scaffold supercont1.1, whole genome shotgun sequence. [Fusobacterium nucleatum subsp. vincentii 4_1_13]	1606081	541497	552107		Prochlorococcus_phage(28.57%)	8	NA	NA
Fusobacterium_nucleatum_subsp._vincentii_4_1_13	GG657999	GG657999 Fusobacterium sp. 4_1_13 genomic scaffold supercont1.1, whole genome shotgun sequence. [Fusobacterium nucleatum subsp. vincentii 4_1_13]	1606081	729411	768269	protease	Fusobacterium_phage(96.23%)	60	NA	NA
Escherichia_coli_MS_45-1	GG772205	GG772205 Escherichia coli MS 45-1 genomic scaffold Scfld133, whole genome shotgun sequence. [Escherichia coli MS 45-1]	154321	128626	153173		Enterobacteria_phage(45.95%)	43	NA	NA
Escherichia_coli_MS_45-1	GG772240	GG772240 Escherichia coli MS 45-1 genomic scaffold Scfld302, whole genome shotgun sequence. [Escherichia coli MS 45-1]	4257	770	3708		Enterobacteria_phage(66.67%)	6	NA	NA
Escherichia_coli_MS_45-1	GG772179	GG772179 Escherichia coli MS 45-1 genomic scaffold Scfld21, whole genome shotgun sequence. [Escherichia coli MS 45-1]	102390	93402	102367		Enterobacteria_phage(50.0%)	8	NA	NA
Escherichia_coli_MS_45-1	GG772274	GG772274 Escherichia coli MS 45-1 genomic scaffold Scfld453, whole genome shotgun sequence. [Escherichia coli MS 45-1]	38915	2602	11411		Enterobacteria_phage(57.14%)	8	NA	NA
Escherichia_coli_MS_45-1	GG772324	GG772324 Escherichia coli MS 45-1 genomic scaffold Scfld1283, whole genome shotgun sequence. [Escherichia coli MS 45-1]	293326	210632	221777		Sodalis_phage(14.29%)	11	NA	NA
Escherichia_coli_MS_45-1	GG772293	GG772293 Escherichia coli MS 45-1 genomic scaffold Scfld713, whole genome shotgun sequence. [Escherichia coli MS 45-1]	10947	23	10424		Escherichia_phage(44.44%)	9	NA	NA
Escherichia_coli_MS_45-1	GG772213	GG772213 Escherichia coli MS 45-1 genomic scaffold Scfld157, whole genome shotgun sequence. [Escherichia coli MS 45-1]	81433	36655	43795		Escherichia_phage(83.33%)	6	NA	NA
Escherichia_coli_MS_45-1	GG772283	GG772283 Escherichia coli MS 45-1 genomic scaffold Scfld585, whole genome shotgun sequence. [Escherichia coli MS 45-1]	10096	239	8093		Staphylococcus_phage(16.67%)	9	NA	NA
Escherichia_coli_MS_45-1	GG772272	GG772272 Escherichia coli MS 45-1 genomic scaffold Scfld449, whole genome shotgun sequence. [Escherichia coli MS 45-1]	58848	14120	21479		Mycobacterium_phage(33.33%)	7	NA	NA
Escherichia_coli_MS_45-1	GG772199	GG772199 Escherichia coli MS 45-1 genomic scaffold Scfld106, whole genome shotgun sequence. [Escherichia coli MS 45-1]	111158	90086	109497		Escherichia_phage(39.13%)	32	NA	NA
Escherichia_coli_MS_45-1	GG772233	GG772233 Escherichia coli MS 45-1 genomic scaffold Scfld271, whole genome shotgun sequence. [Escherichia coli MS 45-1]	242721	140661	150176		Enterobacteria_phage(75.0%)	10	NA	NA
Escherichia_coli_MS_45-1	GG772249	GG772249 Escherichia coli MS 45-1 genomic scaffold Scfld335, whole genome shotgun sequence. [Escherichia coli MS 45-1]	187416	84223	90849		Escherichia_phage(57.14%)	7	NA	NA
Escherichia_coli_MS_45-1	GG772249	GG772249 Escherichia coli MS 45-1 genomic scaffold Scfld335, whole genome shotgun sequence. [Escherichia coli MS 45-1]	187416	121728	131647	tRNA	Mycoplasma_phage(14.29%)	12	NA	NA
Escherichia_coli_MS_45-1	GG772281	GG772281 Escherichia coli MS 45-1 genomic scaffold Scfld524, whole genome shotgun sequence. [Escherichia coli MS 45-1]	4255	558	3497		Enterobacteria_phage(50.0%)	6	NA	NA
Escherichia_coli_MS_45-1	GG772257	GG772257 Escherichia coli MS 45-1 genomic scaffold Scfld373, whole genome shotgun sequence. [Escherichia coli MS 45-1]	279878	226156	239245		Escherichia_phage(83.33%)	6	NA	NA
Escherichia_sp._1_1_43	JH815271	JH815271 Escherichia sp. 1_1_43 genomic scaffold supercont2.19, whole genome shotgun sequence. [Escherichia sp. 1_1_43]	2494410	30312	39843		Shigella_phage(40.0%)	10	NA	NA
Escherichia_sp._1_1_43	JH815271	JH815271 Escherichia sp. 1_1_43 genomic scaffold supercont2.19, whole genome shotgun sequence. [Escherichia sp. 1_1_43]	2494410	323874	333413		Enterobacteria_phage(42.86%)	21	NA	NA
Escherichia_sp._1_1_43	JH815271	JH815271 Escherichia sp. 1_1_43 genomic scaffold supercont2.19, whole genome shotgun sequence. [Escherichia sp. 1_1_43]	2494410	937093	986425	tail	Escherichia_phage(39.62%)	66	NA	NA
Escherichia_sp._1_1_43	JH815271	JH815271 Escherichia sp. 1_1_43 genomic scaffold supercont2.19, whole genome shotgun sequence. [Escherichia sp. 1_1_43]	2494410	1191289	1207476	tRNA	Escherichia_phage(56.25%)	21	NA	NA
Escherichia_sp._1_1_43	JH815271	JH815271 Escherichia sp. 1_1_43 genomic scaffold supercont2.19, whole genome shotgun sequence. [Escherichia sp. 1_1_43]	2494410	1212691	1219729		Escherichia_phage(50.0%)	7	NA	NA
Escherichia_sp._1_1_43	JH815271	JH815271 Escherichia sp. 1_1_43 genomic scaffold supercont2.19, whole genome shotgun sequence. [Escherichia sp. 1_1_43]	2494410	1223849	1239273		Escherichia_phage(42.86%)	16	NA	NA
Escherichia_sp._1_1_43	JH815271	JH815271 Escherichia sp. 1_1_43 genomic scaffold supercont2.19, whole genome shotgun sequence. [Escherichia sp. 1_1_43]	2494410	1245342	1254897	transposase	Escherichia_phage(37.5%)	9	NA	NA
Escherichia_sp._1_1_43	JH815271	JH815271 Escherichia sp. 1_1_43 genomic scaffold supercont2.19, whole genome shotgun sequence. [Escherichia sp. 1_1_43]	2494410	1890661	1896961		Enterobacteria_phage(33.33%)	6	NA	NA
Escherichia_sp._1_1_43	JH815271	JH815271 Escherichia sp. 1_1_43 genomic scaffold supercont2.19, whole genome shotgun sequence. [Escherichia sp. 1_1_43]	2494410	1987433	1996874		Enterobacteria_phage(85.71%)	10	NA	NA
Escherichia_sp._1_1_43	JH815282	JH815282 Escherichia sp. 1_1_43 genomic scaffold supercont2.30, whole genome shotgun sequence. [Escherichia sp. 1_1_43]	153473	57422	95690	tail	Escherichia_phage(34.88%)	45	NA	NA
Escherichia_sp._1_1_43	JH815273	JH815273 Escherichia sp. 1_1_43 genomic scaffold supercont2.21, whole genome shotgun sequence. [Escherichia sp. 1_1_43]	761340	103543	116726		Escherichia_phage(50.0%)	12	NA	NA
Escherichia_sp._1_1_43	JH815273	JH815273 Escherichia sp. 1_1_43 genomic scaffold supercont2.21, whole genome shotgun sequence. [Escherichia sp. 1_1_43]	761340	324892	391978	protease,integrase,transposase,tRNA	Escherichia_phage(25.0%)	53	344044:344059	392377:392392
Escherichia_sp._1_1_43	JH815280	JH815280 Escherichia sp. 1_1_43 genomic scaffold supercont2.28, whole genome shotgun sequence. [Escherichia sp. 1_1_43]	183237	68831	79419	integrase	Enterobacteria_phage(90.0%)	12	68649:68671	79896:79918
Escherichia_sp._1_1_43	JH815275	JH815275 Escherichia sp. 1_1_43 genomic scaffold supercont2.23, whole genome shotgun sequence. [Escherichia sp. 1_1_43]	332274	282869	290859	transposase	Macacine_betaherpesvirus(33.33%)	9	NA	NA
Parabacteroides_sp._2_1_7	EQ973177	EQ973177 Parabacteroides sp. 2_1_7 supercont1.3 genomic scaffold, whole genome shotgun sequence. [Parabacteroides sp. 2_1_7]	813861	60653	68560		Klosneuvirus(16.67%)	9	NA	NA
Parabacteroides_sp._2_1_7	EQ973176	EQ973176 Parabacteroides sp. 2_1_7 supercont1.2 genomic scaffold, whole genome shotgun sequence. [Parabacteroides sp. 2_1_7]	1017756	911374	920496		Synechococcus_phage(57.14%)	8	NA	NA
Klebsiella_pneumoniae_subsp._pneumoniae_WGLW5	JH930428	JH930428 Klebsiella pneumoniae subsp. pneumoniae WGLW5 genomic scaffold supercont1.1, whole genome shotgun sequence. [Klebsiella pneumoniae subsp. pneumoniae WGLW5]	3325226	1111462	1120924	protease,tRNA	Dickeya_phage(16.67%)	8	NA	NA
Klebsiella_pneumoniae_subsp._pneumoniae_WGLW5	JH930428	JH930428 Klebsiella pneumoniae subsp. pneumoniae WGLW5 genomic scaffold supercont1.1, whole genome shotgun sequence. [Klebsiella pneumoniae subsp. pneumoniae WGLW5]	3325226	1812605	1823493		Escherichia_phage(87.5%)	9	NA	NA
Klebsiella_pneumoniae_subsp._pneumoniae_WGLW5	JH930428	JH930428 Klebsiella pneumoniae subsp. pneumoniae WGLW5 genomic scaffold supercont1.1, whole genome shotgun sequence. [Klebsiella pneumoniae subsp. pneumoniae WGLW5]	3325226	2363489	2417044	transposase	Klebsiella_phage(23.91%)	59	NA	NA
Klebsiella_pneumoniae_subsp._pneumoniae_WGLW5	JH930428	JH930428 Klebsiella pneumoniae subsp. pneumoniae WGLW5 genomic scaffold supercont1.1, whole genome shotgun sequence. [Klebsiella pneumoniae subsp. pneumoniae WGLW5]	3325226	2720831	2730621		Burkholderia_phage(37.5%)	9	NA	NA
Klebsiella_pneumoniae_subsp._pneumoniae_WGLW5	JH930428	JH930428 Klebsiella pneumoniae subsp. pneumoniae WGLW5 genomic scaffold supercont1.1, whole genome shotgun sequence. [Klebsiella pneumoniae subsp. pneumoniae WGLW5]	3325226	2737121	2769815	transposase	Klebsiella_phage(58.33%)	45	NA	NA
Klebsiella_pneumoniae_subsp._pneumoniae_WGLW5	JH930428	JH930428 Klebsiella pneumoniae subsp. pneumoniae WGLW5 genomic scaffold supercont1.1, whole genome shotgun sequence. [Klebsiella pneumoniae subsp. pneumoniae WGLW5]	3325226	2884746	2891651		Bacillus_phage(33.33%)	6	NA	NA
Klebsiella_pneumoniae_subsp._pneumoniae_WGLW5	JH930431	JH930431 Klebsiella pneumoniae subsp. pneumoniae WGLW5 genomic scaffold supercont1.4, whole genome shotgun sequence. [Klebsiella pneumoniae subsp. pneumoniae WGLW5]	337582	186306	200733		Salmonella_phage(31.25%)	29	NA	NA
Klebsiella_pneumoniae_subsp._pneumoniae_WGLW5	JH930432	JH930432 Klebsiella pneumoniae subsp. pneumoniae WGLW5 genomic scaffold supercont1.5, whole genome shotgun sequence. [Klebsiella pneumoniae subsp. pneumoniae WGLW5]	139159	52887	74953	transposase	Stx2-converting_phage(27.78%)	23	NA	NA
Klebsiella_pneumoniae_subsp._pneumoniae_WGLW5	JH930433	JH930433 Klebsiella pneumoniae subsp. pneumoniae WGLW5 genomic scaffold supercont1.6, whole genome shotgun sequence. [Klebsiella pneumoniae subsp. pneumoniae WGLW5]	127958	49192	89079	tail	Enterobacteria_phage(35.14%)	48	NA	NA
Klebsiella_pneumoniae_subsp._pneumoniae_WGLW5	JH930429	JH930429 Klebsiella pneumoniae subsp. pneumoniae WGLW5 genomic scaffold supercont1.2, whole genome shotgun sequence. [Klebsiella pneumoniae subsp. pneumoniae WGLW5]	1275233	27558	40020	integrase	Enterobacteria_phage(60.0%)	14	28534:28550	40450:40466
Klebsiella_pneumoniae_subsp._pneumoniae_WGLW5	JH930429	JH930429 Klebsiella pneumoniae subsp. pneumoniae WGLW5 genomic scaffold supercont1.2, whole genome shotgun sequence. [Klebsiella pneumoniae subsp. pneumoniae WGLW5]	1275233	82410	89765		Streptococcus_phage(16.67%)	7	NA	NA
Klebsiella_pneumoniae_subsp._pneumoniae_WGLW5	JH930429	JH930429 Klebsiella pneumoniae subsp. pneumoniae WGLW5 genomic scaffold supercont1.2, whole genome shotgun sequence. [Klebsiella pneumoniae subsp. pneumoniae WGLW5]	1275233	546504	590923	tail,tRNA	Salmonella_phage(79.07%)	52	NA	NA
Neisseria_macacae_ATCC_33926	GL985620	GL985620 Neisseria macacae ATCC 33926 genomic scaffold SCAFFOLD3, whole genome shotgun sequence. [Neisseria macacae ATCC 33926]	283360	34362	44243	protease	Staphylococcus_phage(14.29%)	11	NA	NA
Clostridium_sp._L2-50	DS480323	DS480323 Clostridium sp. L2-50 Scfld_02_12 genomic scaffold, whole genome shotgun sequence. [Clostridium sp. L2-50]	145615	15334	26247		Clostridium_phage(33.33%)	8	NA	NA
Helicobacter_pylori_HP260Bi	KB635828	KB635828 Helicobacter pylori HP260Bi genomic scaffold Scfld16, whole genome shotgun sequence. [Helicobacter pylori HP260Bi]	5420	851	5179		Escherichia_phage(100.0%)	6	NA	NA
Helicobacter_pylori_HP260Bi	KB635857	KB635857 Helicobacter pylori HP260Bi genomic scaffold Scfld40, whole genome shotgun sequence. [Helicobacter pylori HP260Bi]	47949	201	17360		Helicobacter_phage(91.67%)	24	NA	NA
Helicobacter_pylori_HP260Bi	KB635839	KB635839 Helicobacter pylori HP260Bi genomic scaffold Scfld235, whole genome shotgun sequence. [Helicobacter pylori HP260Bi]	40744	423	8696	tRNA	Synechococcus_phage(33.33%)	7	NA	NA
Providencia_rustigianii_DSM_4541	GG703830	GG703830 Providencia rustigianii DSM 4541 genomic scaffold Scfld13, whole genome shotgun sequence. [Providencia rustigianii DSM 4541]	3291	361	3243		Salmonella_phage(83.33%)	6	NA	NA
Providencia_rustigianii_DSM_4541	GG703819	GG703819 Providencia rustigianii DSM 4541 genomic scaffold Scfld2, whole genome shotgun sequence. [Providencia rustigianii DSM 4541]	979937	67472	75099		Mycoplasma_phage(16.67%)	9	NA	NA
Providencia_rustigianii_DSM_4541	GG703819	GG703819 Providencia rustigianii DSM 4541 genomic scaffold Scfld2, whole genome shotgun sequence. [Providencia rustigianii DSM 4541]	979937	107738	150598		Pectobacterium_phage(20.45%)	63	NA	NA
Providencia_rustigianii_DSM_4541	GG703819	GG703819 Providencia rustigianii DSM 4541 genomic scaffold Scfld2, whole genome shotgun sequence. [Providencia rustigianii DSM 4541]	979937	177313	237243	integrase,transposase	Shigella_phage(27.27%)	56	175411:175425	192879:192893
Providencia_rustigianii_DSM_4541	GG703819	GG703819 Providencia rustigianii DSM 4541 genomic scaffold Scfld2, whole genome shotgun sequence. [Providencia rustigianii DSM 4541]	979937	629624	645107	protease	Enterobacteria_phage(18.18%)	24	NA	NA
Providencia_rustigianii_DSM_4541	GG703819	GG703819 Providencia rustigianii DSM 4541 genomic scaffold Scfld2, whole genome shotgun sequence. [Providencia rustigianii DSM 4541]	979937	861204	866342		Escherichia_phage(83.33%)	6	NA	NA
Providencia_rustigianii_DSM_4541	GG703818	GG703818 Providencia rustigianii DSM 4541 genomic scaffold Scfld1, whole genome shotgun sequence. [Providencia rustigianii DSM 4541]	1018771	666459	675787	transposase	Dickeya_phage(33.33%)	9	NA	NA
Providencia_rustigianii_DSM_4541	GG703822	GG703822 Providencia rustigianii DSM 4541 genomic scaffold Scfld5, whole genome shotgun sequence. [Providencia rustigianii DSM 4541]	143660	125678	143565		Salmonella_phage(25.0%)	22	NA	NA
Providencia_rustigianii_DSM_4541	GG703817	GG703817 Providencia rustigianii DSM 4541 genomic scaffold Scfld0, whole genome shotgun sequence. [Providencia rustigianii DSM 4541]	1070578	3060	17358		Morganella_phage(18.75%)	23	NA	NA
Providencia_rustigianii_DSM_4541	GG703817	GG703817 Providencia rustigianii DSM 4541 genomic scaffold Scfld0, whole genome shotgun sequence. [Providencia rustigianii DSM 4541]	1070578	228622	237201		Mycobacterium_phage(28.57%)	10	NA	NA
Providencia_rustigianii_DSM_4541	GG703817	GG703817 Providencia rustigianii DSM 4541 genomic scaffold Scfld0, whole genome shotgun sequence. [Providencia rustigianii DSM 4541]	1070578	252215	257817		Salmonella_phage(50.0%)	6	NA	NA
Providencia_rustigianii_DSM_4541	GG703817	GG703817 Providencia rustigianii DSM 4541 genomic scaffold Scfld0, whole genome shotgun sequence. [Providencia rustigianii DSM 4541]	1070578	430110	453832	tail	Salmonella_phage(68.0%)	28	NA	NA
Providencia_rustigianii_DSM_4541	GG703817	GG703817 Providencia rustigianii DSM 4541 genomic scaffold Scfld0, whole genome shotgun sequence. [Providencia rustigianii DSM 4541]	1070578	457487	465606		Enterobacteria_phage(33.33%)	11	NA	NA
Providencia_rustigianii_DSM_4541	GG703817	GG703817 Providencia rustigianii DSM 4541 genomic scaffold Scfld0, whole genome shotgun sequence. [Providencia rustigianii DSM 4541]	1070578	852370	879404		Cronobacter_phage(71.43%)	35	NA	NA
Providencia_rustigianii_DSM_4541	GG703817	GG703817 Providencia rustigianii DSM 4541 genomic scaffold Scfld0, whole genome shotgun sequence. [Providencia rustigianii DSM 4541]	1070578	1043806	1070500	protease	Enterobacteria_phage(60.0%)	30	NA	NA
Providencia_rustigianii_DSM_4541	GG703827	GG703827 Providencia rustigianii DSM 4541 genomic scaffold Scfld10, whole genome shotgun sequence. [Providencia rustigianii DSM 4541]	14473	7192	13868	tail	Salmonella_phage(37.5%)	9	NA	NA
Barnesiella_intestinihominis_YIT_11860	JH815205	JH815205 Barnesiella intestinihominis YIT 11860 genomic scaffold supercont1.3, whole genome shotgun sequence. [Barnesiella intestinihominis YIT 11860]	721957	269460	278233	protease	Bacillus_phage(16.67%)	10	NA	NA
Barnesiella_intestinihominis_YIT_11860	JH815206	JH815206 Barnesiella intestinihominis YIT 11860 genomic scaffold supercont1.4, whole genome shotgun sequence. [Barnesiella intestinihominis YIT 11860]	517523	140225	149518	tRNA	Planktothrix_phage(16.67%)	8	NA	NA
Barnesiella_intestinihominis_YIT_11860	JH815203	JH815203 Barnesiella intestinihominis YIT 11860 genomic scaffold supercont1.1, whole genome shotgun sequence. [Barnesiella intestinihominis YIT 11860]	1217791	202068	211069		unidentified_phage(71.43%)	9	NA	NA
Bacteroides_xylanisolvens_SD_CC_2a	ADMP01000260	ADMP01000260 Bacteroides xylanisolvens SD CC 2a contig00060, whole genome shotgun sequence. [Bacteroides xylanisolvens SD CC 2a]	11913	738	10512		Tetraselmis_virus(28.57%)	10	NA	NA
Bacteroides_xylanisolvens_SD_CC_2a	ADMP01000124	ADMP01000124 Bacteroides xylanisolvens SD CC 2a contig00250, whole genome shotgun sequence. [Bacteroides xylanisolvens SD CC 2a]	22270	6363	11446		Erwinia_phage(16.67%)	7	NA	NA
Bacteroides_xylanisolvens_SD_CC_2a	ADMP01000098	ADMP01000098 Bacteroides xylanisolvens SD CC 2a contig00305, whole genome shotgun sequence. [Bacteroides xylanisolvens SD CC 2a]	33455	8464	32779		Cellulophaga_phage(11.76%)	31	NA	NA
Lachnospiraceae_Clostridium_cf._saccharolyticum_K10	FP929037	FP929037 Clostridium saccharolyticum-like K10 draft genome. [Lachnospiraceae [Clostridium] cf. saccharolyticum K10]	3769775	643988	652716		Bacillus_phage(33.33%)	9	NA	NA
Lachnospiraceae_Clostridium_cf._saccharolyticum_K10	FP929037	FP929037 Clostridium saccharolyticum-like K10 draft genome. [Lachnospiraceae [Clostridium] cf. saccharolyticum K10]	3769775	1021523	1031073		Bacillus_phage(66.67%)	7	NA	NA
Lachnospiraceae_Clostridium_cf._saccharolyticum_K10	FP929037	FP929037 Clostridium saccharolyticum-like K10 draft genome. [Lachnospiraceae [Clostridium] cf. saccharolyticum K10]	3769775	2064820	2072208		Bacillus_phage(33.33%)	12	NA	NA
Lachnospiraceae_Clostridium_cf._saccharolyticum_K10	FP929037	FP929037 Clostridium saccharolyticum-like K10 draft genome. [Lachnospiraceae [Clostridium] cf. saccharolyticum K10]	3769775	2079220	2096770		Faecalibacterium_phage(75.0%)	19	NA	NA
Lachnospiraceae_Clostridium_cf._saccharolyticum_K10	FP929037	FP929037 Clostridium saccharolyticum-like K10 draft genome. [Lachnospiraceae [Clostridium] cf. saccharolyticum K10]	3769775	2382031	2388989		Streptococcus_phage(33.33%)	8	NA	NA
Lachnospiraceae_Clostridium_cf._saccharolyticum_K10	FP929037	FP929037 Clostridium saccharolyticum-like K10 draft genome. [Lachnospiraceae [Clostridium] cf. saccharolyticum K10]	3769775	2801634	2811234		Streptococcus_phage(16.67%)	10	NA	NA
Lachnospiraceae_bacterium_6_1_37FAA	GL872351	GL872351 Lachnospiraceae bacterium 6_1_37FAA genomic scaffold supercont1.3, whole genome shotgun sequence. [Lachnospiraceae bacterium 6_1_37FAA]	376440	205891	219216		Streptococcus_phage(100.0%)	15	NA	NA
Lachnospiraceae_bacterium_6_1_37FAA	GL872351	GL872351 Lachnospiraceae bacterium 6_1_37FAA genomic scaffold supercont1.3, whole genome shotgun sequence. [Lachnospiraceae bacterium 6_1_37FAA]	376440	240271	251140	tRNA	Anomala_cuprea_entomopoxvirus(16.67%)	9	NA	NA
Lachnospiraceae_bacterium_6_1_37FAA	GL872351	GL872351 Lachnospiraceae bacterium 6_1_37FAA genomic scaffold supercont1.3, whole genome shotgun sequence. [Lachnospiraceae bacterium 6_1_37FAA]	376440	365723	373283		Bacillus_virus(50.0%)	8	NA	NA
Lachnospiraceae_bacterium_6_1_37FAA	GL872349	GL872349 Lachnospiraceae bacterium 6_1_37FAA genomic scaffold supercont1.1, whole genome shotgun sequence. [Lachnospiraceae bacterium 6_1_37FAA]	1867026	44787	54625	transposase,tRNA	Cafeteria_roenbergensis_virus(12.5%)	14	NA	NA
Lachnospiraceae_bacterium_6_1_37FAA	GL872349	GL872349 Lachnospiraceae bacterium 6_1_37FAA genomic scaffold supercont1.1, whole genome shotgun sequence. [Lachnospiraceae bacterium 6_1_37FAA]	1867026	793712	822585		Clostridium_botulinum_C_phage(33.33%)	39	NA	NA
Lachnospiraceae_bacterium_6_1_37FAA	GL872349	GL872349 Lachnospiraceae bacterium 6_1_37FAA genomic scaffold supercont1.1, whole genome shotgun sequence. [Lachnospiraceae bacterium 6_1_37FAA]	1867026	884052	890740	transposase	Leptospira_phage(16.67%)	9	NA	NA
Lachnospiraceae_bacterium_6_1_37FAA	GL872349	GL872349 Lachnospiraceae bacterium 6_1_37FAA genomic scaffold supercont1.1, whole genome shotgun sequence. [Lachnospiraceae bacterium 6_1_37FAA]	1867026	1423483	1429832		Erysipelothrix_phage(66.67%)	7	NA	NA
Lachnospiraceae_bacterium_6_1_37FAA	GL872349	GL872349 Lachnospiraceae bacterium 6_1_37FAA genomic scaffold supercont1.1, whole genome shotgun sequence. [Lachnospiraceae bacterium 6_1_37FAA]	1867026	1434093	1458627	protease	Erysipelothrix_phage(47.83%)	34	NA	NA
Lachnospiraceae_bacterium_6_1_37FAA	GL872349	GL872349 Lachnospiraceae bacterium 6_1_37FAA genomic scaffold supercont1.1, whole genome shotgun sequence. [Lachnospiraceae bacterium 6_1_37FAA]	1867026	1776847	1786754		Enterobacteria_phage(28.57%)	13	NA	NA
Lachnospiraceae_bacterium_6_1_37FAA	GL872350	GL872350 Lachnospiraceae bacterium 6_1_37FAA genomic scaffold supercont1.2, whole genome shotgun sequence. [Lachnospiraceae bacterium 6_1_37FAA]	411897	266688	277195	integrase	Aureococcus_anophage(14.29%)	9	270644:270657	279904:279917
Lachnospiraceae_bacterium_6_1_37FAA	GL872350	GL872350 Lachnospiraceae bacterium 6_1_37FAA genomic scaffold supercont1.2, whole genome shotgun sequence. [Lachnospiraceae bacterium 6_1_37FAA]	411897	320206	326200		Streptococcus_phage(33.33%)	7	NA	NA
Enterobacter_cancerogenus_ATCC_35316	GG704863	GG704863 Enterobacter cancerogenus ATCC 35316 genomic scaffold Scfld0, whole genome shotgun sequence. [Enterobacter cancerogenus ATCC 35316]	2235134	451324	462464	protease	Vibrio_phage(33.33%)	6	NA	NA
Enterobacter_cancerogenus_ATCC_35316	GG704863	GG704863 Enterobacter cancerogenus ATCC 35316 genomic scaffold Scfld0, whole genome shotgun sequence. [Enterobacter cancerogenus ATCC 35316]	2235134	947497	956054		Escherichia_phage(66.67%)	10	NA	NA
Enterobacter_cancerogenus_ATCC_35316	GG704863	GG704863 Enterobacter cancerogenus ATCC 35316 genomic scaffold Scfld0, whole genome shotgun sequence. [Enterobacter cancerogenus ATCC 35316]	2235134	1368347	1393297	tail	Erwinia_phage(29.63%)	29	NA	NA
Enterobacter_cancerogenus_ATCC_35316	GG704863	GG704863 Enterobacter cancerogenus ATCC 35316 genomic scaffold Scfld0, whole genome shotgun sequence. [Enterobacter cancerogenus ATCC 35316]	2235134	1640460	1682686		Cronobacter_phage(33.96%)	70	NA	NA
Enterobacter_cancerogenus_ATCC_35316	GG704869	GG704869 Enterobacter cancerogenus ATCC 35316 genomic scaffold Scfld6, whole genome shotgun sequence. [Enterobacter cancerogenus ATCC 35316]	7450	2072	7302		Enterobacteria_phage(50.0%)	7	NA	NA
Enterobacter_cancerogenus_ATCC_35316	GG704864	GG704864 Enterobacter cancerogenus ATCC 35316 genomic scaffold Scfld1, whole genome shotgun sequence. [Enterobacter cancerogenus ATCC 35316]	1031480	728373	750356		Burkholderia_phage(37.5%)	20	NA	NA
Enterobacter_cancerogenus_ATCC_35316	GG704865	GG704865 Enterobacter cancerogenus ATCC 35316 genomic scaffold Scfld2, whole genome shotgun sequence. [Enterobacter cancerogenus ATCC 35316]	1007801	379481	384793		uncultured_Mediterranean_phage(33.33%)	7	NA	NA
Enterobacter_cancerogenus_ATCC_35316	GG704865	GG704865 Enterobacter cancerogenus ATCC 35316 genomic scaffold Scfld2, whole genome shotgun sequence. [Enterobacter cancerogenus ATCC 35316]	1007801	720494	745113	tRNA,tail	Erwinia_phage(40.74%)	30	NA	NA
Enterobacter_cancerogenus_ATCC_35316	GG704865	GG704865 Enterobacter cancerogenus ATCC 35316 genomic scaffold Scfld2, whole genome shotgun sequence. [Enterobacter cancerogenus ATCC 35316]	1007801	951350	973742	integrase	uncultured_Caudovirales_phage(72.22%)	23	949391:949414	965700:965723
Bifidobacterium_angulatum_DSM_20098_=_JCM_7096	GG663535	GG663535 Bifidobacterium angulatum DSM 20098 genomic scaffold Scfld0, whole genome shotgun sequence. [Bifidobacterium angulatum DSM 20098 = JCM 7096]	1728959	1218194	1227650	protease,tRNA	Agrobacterium_phage(33.33%)	8	NA	NA
Helicobacter_pylori_GAM101Biv	KB636778	KB636778 Helicobacter pylori GAM101Biv genomic scaffold Scfld10, whole genome shotgun sequence. [Helicobacter pylori GAM101Biv]	5416	969	5395		Escherichia_phage(100.0%)	7	NA	NA
Lactobacillus_reuteri_MM2-3	GG693762	GG693762 Lactobacillus reuteri MM2-3 genomic scaffold SCAFFOLD7, whole genome shotgun sequence. [Lactobacillus reuteri MM2-3]	174551	167415	174323		Lactobacillus_prophage(42.86%)	13	NA	NA
Lactobacillus_reuteri_MM2-3	GG693760	GG693760 Lactobacillus reuteri MM2-3 genomic scaffold SCAFFOLD5, whole genome shotgun sequence. [Lactobacillus reuteri MM2-3]	102747	85649	102239	protease	Lactobacillus_phage(81.25%)	19	NA	NA
Lactobacillus_reuteri_MM2-3	GG693759	GG693759 Lactobacillus reuteri MM2-3 genomic scaffold SCAFFOLD4, whole genome shotgun sequence. [Lactobacillus reuteri MM2-3]	229033	83229	95867		Staphylococcus_phage(30.0%)	17	NA	NA
Lactobacillus_reuteri_MM2-3	GG693759	GG693759 Lactobacillus reuteri MM2-3 genomic scaffold SCAFFOLD4, whole genome shotgun sequence. [Lactobacillus reuteri MM2-3]	229033	124507	133522	integrase	Lactobacillus_phage(42.86%)	10	118002:118016	131765:131779
Lactobacillus_reuteri_MM2-3	GG693759	GG693759 Lactobacillus reuteri MM2-3 genomic scaffold SCAFFOLD4, whole genome shotgun sequence. [Lactobacillus reuteri MM2-3]	229033	190042	198107	protease	Staphylococcus_phage(33.33%)	8	NA	NA
Lactobacillus_reuteri_MM2-3	GG693759	GG693759 Lactobacillus reuteri MM2-3 genomic scaffold SCAFFOLD4, whole genome shotgun sequence. [Lactobacillus reuteri MM2-3]	229033	220782	228804		Lactobacillus_phage(71.43%)	15	NA	NA
Lactobacillus_reuteri_MM2-3	GG693756	GG693756 Lactobacillus reuteri MM2-3 genomic scaffold SCAFFOLD1, whole genome shotgun sequence. [Lactobacillus reuteri MM2-3]	795806	780570	792624		Synechococcus_phage(25.0%)	11	NA	NA
Enterococcus_faecalis_TX4244	GL454684	GL454684 Enterococcus faecalis TX4244 genomic scaffold Scfld22, whole genome shotgun sequence. [Enterococcus faecalis TX4244]	260433	234190	245104		Streptococcus_phage(50.0%)	12	NA	NA
Enterococcus_faecalis_TX4244	GL454681	GL454681 Enterococcus faecalis TX4244 genomic scaffold Scfld19, whole genome shotgun sequence. [Enterococcus faecalis TX4244]	43526	27026	43455	tRNA	Enterococcus_phage(47.06%)	26	NA	NA
Enterococcus_faecalis_TX4244	GL454701	GL454701 Enterococcus faecalis TX4244 genomic scaffold Scfld92, whole genome shotgun sequence. [Enterococcus faecalis TX4244]	734848	93634	114049	tRNA	Enterococcus_phage(37.5%)	24	NA	NA
Enterococcus_faecalis_TX4244	GL454701	GL454701 Enterococcus faecalis TX4244 genomic scaffold Scfld92, whole genome shotgun sequence. [Enterococcus faecalis TX4244]	734848	548229	556874		Synechococcus_phage(50.0%)	9	NA	NA
Enterococcus_faecalis_TX4244	GL454701	GL454701 Enterococcus faecalis TX4244 genomic scaffold Scfld92, whole genome shotgun sequence. [Enterococcus faecalis TX4244]	734848	729421	733221		Enterococcus_phage(66.67%)	7	NA	NA
Enterococcus_faecalis_TX4244	GL454698	GL454698 Enterococcus faecalis TX4244 genomic scaffold Scfld72, whole genome shotgun sequence. [Enterococcus faecalis TX4244]	218817	77539	85459	transposase	Planktothrix_phage(33.33%)	11	NA	NA
Enterococcus_faecalis_TX4244	GL454728	GL454728 Enterococcus faecalis TX4244 genomic scaffold Scfld423, whole genome shotgun sequence. [Enterococcus faecalis TX4244]	91041	80747	90954		Enterococcus_phage(80.0%)	20	NA	NA
Enterococcus_faecalis_TX4244	GL454719	GL454719 Enterococcus faecalis TX4244 genomic scaffold Scfld187, whole genome shotgun sequence. [Enterococcus faecalis TX4244]	57681	25311	39018		Streptococcus_phage(100.0%)	12	NA	NA
Enterococcus_faecalis_TX4244	GL454679	GL454679 Enterococcus faecalis TX4244 genomic scaffold Scfld17, whole genome shotgun sequence. [Enterococcus faecalis TX4244]	61752	27218	38069		Staphylococcus_phage(33.33%)	8	NA	NA
Enterococcus_faecalis_TX4244	GL454686	GL454686 Enterococcus faecalis TX4244 genomic scaffold Scfld26, whole genome shotgun sequence. [Enterococcus faecalis TX4244]	14813	2798	14778		uncultured_Caudovirales_phage(35.71%)	15	NA	NA
Enterococcus_faecalis_TX4244	GL454710	GL454710 Enterococcus faecalis TX4244 genomic scaffold Scfld134, whole genome shotgun sequence. [Enterococcus faecalis TX4244]	280523	132104	138956		Enterococcus_phage(33.33%)	7	NA	NA
Escherichia_coli_MS_200-1	GG773780	GG773780 Escherichia coli MS 200-1 genomic scaffold Scfld155, whole genome shotgun sequence. [Escherichia coli MS 200-1]	109098	5544	12683		Escherichia_phage(83.33%)	6	NA	NA
Escherichia_coli_MS_200-1	GG773809	GG773809 Escherichia coli MS 200-1 genomic scaffold Scfld309, whole genome shotgun sequence. [Escherichia coli MS 200-1]	318995	204762	214282		Enterobacteria_phage(77.78%)	11	NA	NA
Escherichia_coli_MS_200-1	GG773831	GG773831 Escherichia coli MS 200-1 genomic scaffold Scfld406, whole genome shotgun sequence. [Escherichia coli MS 200-1]	130832	47899	59050		Sodalis_phage(14.29%)	11	NA	NA
Escherichia_coli_MS_200-1	GG773877	GG773877 Escherichia coli MS 200-1 genomic scaffold Scfld819, whole genome shotgun sequence. [Escherichia coli MS 200-1]	176217	125197	131628		Escherichia_phage(50.0%)	6	NA	NA
Escherichia_coli_MS_200-1	GG773877	GG773877 Escherichia coli MS 200-1 genomic scaffold Scfld819, whole genome shotgun sequence. [Escherichia coli MS 200-1]	176217	162723	172769	tRNA	Mycoplasma_phage(14.29%)	12	NA	NA
Escherichia_coli_MS_200-1	GG773834	GG773834 Escherichia coli MS 200-1 genomic scaffold Scfld418, whole genome shotgun sequence. [Escherichia coli MS 200-1]	48860	66	11130	integrase	Enterobacteria_phage(90.0%)	13	NA	NA
Escherichia_coli_MS_200-1	GG773815	GG773815 Escherichia coli MS 200-1 genomic scaffold Scfld328, whole genome shotgun sequence. [Escherichia coli MS 200-1]	267475	108	19531		Enterobacteria_phage(42.42%)	36	NA	NA
Escherichia_coli_MS_200-1	GG773855	GG773855 Escherichia coli MS 200-1 genomic scaffold Scfld536, whole genome shotgun sequence. [Escherichia coli MS 200-1]	15817	535	15243		Enterobacteria_phage(56.25%)	18	NA	NA
Escherichia_coli_MS_200-1	GG773854	GG773854 Escherichia coli MS 200-1 genomic scaffold Scfld533, whole genome shotgun sequence. [Escherichia coli MS 200-1]	171622	5841	22977	protease	Escherichia_phage(18.18%)	19	NA	NA
Escherichia_coli_MS_200-1	GG773844	GG773844 Escherichia coli MS 200-1 genomic scaffold Scfld476, whole genome shotgun sequence. [Escherichia coli MS 200-1]	50582	11669	19028		Mycobacterium_phage(33.33%)	7	NA	NA
Escherichia_coli_MS_200-1	GG773857	GG773857 Escherichia coli MS 200-1 genomic scaffold Scfld552, whole genome shotgun sequence. [Escherichia coli MS 200-1]	106623	71698	105766	protease,integrase	Enterobacteria_phage(48.78%)	46	67883:67897	98327:98341
Escherichia_coli_MS_200-1	GG773846	GG773846 Escherichia coli MS 200-1 genomic scaffold Scfld497, whole genome shotgun sequence. [Escherichia coli MS 200-1]	66854	239	8093		Staphylococcus_phage(16.67%)	9	NA	NA
Streptomyces_sp._HGB0020	KE150427	KE150427 Streptomyces sp. HGB0020 genomic scaffold aczIR-supercont1.2, whole genome shotgun sequence. [Streptomyces sp. HGB0020]	2202507	916943	923428		Streptomyces_phage(66.67%)	9	NA	NA
Streptomyces_sp._HGB0020	KE150427	KE150427 Streptomyces sp. HGB0020 genomic scaffold aczIR-supercont1.2, whole genome shotgun sequence. [Streptomyces sp. HGB0020]	2202507	929537	938997		Streptomyces_phage(66.67%)	7	NA	NA
Streptomyces_sp._HGB0020	KE150430	KE150430 Streptomyces sp. HGB0020 genomic scaffold aczIR-supercont1.5, whole genome shotgun sequence. [Streptomyces sp. HGB0020]	767016	320954	338219		Streptomyces_phage(58.33%)	20	NA	NA
Veillonella_sp._6_1_27	GG770215	GG770215 Veillonella sp. 6_1_27 genomic scaffold supercont1.1, whole genome shotgun sequence. [Veillonella sp. 6_1_27]	871767	614077	625423		uncultured_phage(42.86%)	11	NA	NA
Veillonella_sp._6_1_27	GG770215	GG770215 Veillonella sp. 6_1_27 genomic scaffold supercont1.1, whole genome shotgun sequence. [Veillonella sp. 6_1_27]	871767	841127	864028		uncultured_phage(25.0%)	32	NA	NA
Veillonella_sp._6_1_27	GG770217	GG770217 Veillonella sp. 6_1_27 genomic scaffold supercont1.3, whole genome shotgun sequence. [Veillonella sp. 6_1_27]	473618	106401	112391		Cyanophage(33.33%)	6	NA	NA
Acinetobacter_radioresistens_SH164	GG705135	GG705135 Acinetobacter radioresistens SH164 genomic scaffold supercont1.5, whole genome shotgun sequence. [Acinetobacter radioresistens SH164]	162962	102647	112134		Bacillus_phage(50.0%)	7	NA	NA
Acinetobacter_radioresistens_SH164	GG705136	GG705136 Acinetobacter radioresistens SH164 genomic scaffold supercont1.6, whole genome shotgun sequence. [Acinetobacter radioresistens SH164]	57971	48009	54070		uncultured_Caudovirales_phage(71.43%)	8	NA	NA
Acinetobacter_radioresistens_SH164	GG705131	GG705131 Acinetobacter radioresistens SH164 genomic scaffold supercont1.1, whole genome shotgun sequence. [Acinetobacter radioresistens SH164]	1059412	214535	228302		Acinetobacter_phage(41.67%)	20	NA	NA
Acinetobacter_radioresistens_SH164	GG705131	GG705131 Acinetobacter radioresistens SH164 genomic scaffold supercont1.1, whole genome shotgun sequence. [Acinetobacter radioresistens SH164]	1059412	638994	644229		Acinetobacter_phage(83.33%)	6	NA	NA
Acinetobacter_radioresistens_SH164	GG705131	GG705131 Acinetobacter radioresistens SH164 genomic scaffold supercont1.1, whole genome shotgun sequence. [Acinetobacter radioresistens SH164]	1059412	712944	755438	integrase,transposase	Escherichia_phage(25.0%)	45	710756:710770	728664:728678
Acinetobacter_radioresistens_SH164	GG705139	GG705139 Acinetobacter radioresistens SH164 genomic scaffold supercont1.9, whole genome shotgun sequence. [Acinetobacter radioresistens SH164]	9672	282	7660		Vibrio_virus(12.5%)	10	NA	NA
Acinetobacter_radioresistens_SH164	GG705133	GG705133 Acinetobacter radioresistens SH164 genomic scaffold supercont1.3, whole genome shotgun sequence. [Acinetobacter radioresistens SH164]	455968	416904	424545	tRNA	Thermobifida_phage(16.67%)	9	NA	NA
Acinetobacter_radioresistens_SH164	GG705132	GG705132 Acinetobacter radioresistens SH164 genomic scaffold supercont1.2, whole genome shotgun sequence. [Acinetobacter radioresistens SH164]	954759	535892	541204		Acinetobacter_phage(50.0%)	10	NA	NA
Acinetobacter_radioresistens_SH164	GG705132	GG705132 Acinetobacter radioresistens SH164 genomic scaffold supercont1.2, whole genome shotgun sequence. [Acinetobacter radioresistens SH164]	954759	544998	552346		uncultured_Caudovirales_phage(87.5%)	8	NA	NA
Acinetobacter_radioresistens_SH164	GG705132	GG705132 Acinetobacter radioresistens SH164 genomic scaffold supercont1.2, whole genome shotgun sequence. [Acinetobacter radioresistens SH164]	954759	667018	678133		Organic_Lake_phycodnavirus(16.67%)	9	NA	NA
Acinetobacter_radioresistens_SH164	GG705132	GG705132 Acinetobacter radioresistens SH164 genomic scaffold supercont1.2, whole genome shotgun sequence. [Acinetobacter radioresistens SH164]	954759	865254	879205	tRNA	Bacillus_phage(22.22%)	13	NA	NA
Anaerostipes_hadrus_DSM_3319	KB290651	KB290651 Anaerostipes hadrus DSM 3319 genomic scaffold Scfld71, whole genome shotgun sequence. [Anaerostipes hadrus DSM 3319]	155257	19808	32608		Streptococcus_phage(100.0%)	15	NA	NA
Anaerostipes_hadrus_DSM_3319	KB290680	KB290680 Anaerostipes hadrus DSM 3319 genomic scaffold Scfld257, whole genome shotgun sequence. [Anaerostipes hadrus DSM 3319]	62887	44197	58785	protease	Clostridium_phage(41.67%)	19	NA	NA
Anaerostipes_hadrus_DSM_3319	KB290670	KB290670 Anaerostipes hadrus DSM 3319 genomic scaffold Scfld178, whole genome shotgun sequence. [Anaerostipes hadrus DSM 3319]	40242	24667	34500	transposase	Bacillus_phage(28.57%)	9	NA	NA
Anaerostipes_hadrus_DSM_3319	KB290642	KB290642 Anaerostipes hadrus DSM 3319 genomic scaffold Scfld21, whole genome shotgun sequence. [Anaerostipes hadrus DSM 3319]	5418	8	4722		Escherichia_phage(100.0%)	7	NA	NA
Anaerostipes_hadrus_DSM_3319	KB290653	KB290653 Anaerostipes hadrus DSM 3319 genomic scaffold Scfld75, whole genome shotgun sequence. [Anaerostipes hadrus DSM 3319]	73849	17234	24576		unidentified_phage(16.67%)	9	NA	NA
Anaerostipes_hadrus_DSM_3319	KB290653	KB290653 Anaerostipes hadrus DSM 3319 genomic scaffold Scfld75, whole genome shotgun sequence. [Anaerostipes hadrus DSM 3319]	73849	29778	41556		Streptococcus_phage(15.38%)	20	NA	NA
Helicobacter_pylori_GAMchJs117Ai	KB644776	KB644776 Helicobacter pylori GAMchJs117Ai genomic scaffold Scfld5, whole genome shotgun sequence. [Helicobacter pylori GAMchJs117Ai]	5418	69	5392		Escherichia_phage(100.0%)	7	NA	NA
Helicobacter_pylori_GAMchJs117Ai	KB644773	KB644773 Helicobacter pylori GAMchJs117Ai genomic scaffold Scfld38, whole genome shotgun sequence. [Helicobacter pylori GAMchJs117Ai]	76968	27468	38413		uncultured_Caudovirales_phage(42.86%)	10	NA	NA
Erysipelotrichaceae_bacterium_3_1_53	GL520133	GL520133 Erysipelotrichaceae bacterium 3_1_53 genomic scaffold supercont1.2, whole genome shotgun sequence. [Erysipelotrichaceae bacterium 3_1_53]	437632	6209	23927	tRNA	Streptococcus_phage(61.54%)	17	NA	NA
Erysipelotrichaceae_bacterium_3_1_53	GL520133	GL520133 Erysipelotrichaceae bacterium 3_1_53 genomic scaffold supercont1.2, whole genome shotgun sequence. [Erysipelotrichaceae bacterium 3_1_53]	437632	47205	60631	holin	Staphylococcus_phage(62.5%)	13	NA	NA
Erysipelotrichaceae_bacterium_3_1_53	GL520134	GL520134 Erysipelotrichaceae bacterium 3_1_53 genomic scaffold supercont1.3, whole genome shotgun sequence. [Erysipelotrichaceae bacterium 3_1_53]	428862	29534	49884		Streptococcus_phage(100.0%)	27	NA	NA
Erysipelotrichaceae_bacterium_3_1_53	GL520134	GL520134 Erysipelotrichaceae bacterium 3_1_53 genomic scaffold supercont1.3, whole genome shotgun sequence. [Erysipelotrichaceae bacterium 3_1_53]	428862	218145	223472		uncultured_Caudovirales_phage(66.67%)	7	NA	NA
Erysipelotrichaceae_bacterium_3_1_53	GL520145	GL520145 Erysipelotrichaceae bacterium 3_1_53 genomic scaffold supercont1.14, whole genome shotgun sequence. [Erysipelotrichaceae bacterium 3_1_53]	124318	88799	99272		Synechococcus_phage(28.57%)	12	NA	NA
Erysipelotrichaceae_bacterium_3_1_53	GL520156	GL520156 Erysipelotrichaceae bacterium 3_1_53 genomic scaffold supercont1.25, whole genome shotgun sequence. [Erysipelotrichaceae bacterium 3_1_53]	37970	26714	37845		Streptococcus_phage(100.0%)	14	NA	NA
Erysipelotrichaceae_bacterium_3_1_53	GL520146	GL520146 Erysipelotrichaceae bacterium 3_1_53 genomic scaffold supercont1.15, whole genome shotgun sequence. [Erysipelotrichaceae bacterium 3_1_53]	102172	25067	37293		Clostridium_phage(25.0%)	13	NA	NA
Roseburia_intestinalis_L1-82	GG692722	GG692722 Roseburia intestinalis L1-82 genomic scaffold Scfld9, whole genome shotgun sequence. [Roseburia intestinalis L1-82]	127018	42713	57987		Streptococcus_phage(91.67%)	18	NA	NA
Roseburia_intestinalis_L1-82	GG692714	GG692714 Roseburia intestinalis L1-82 genomic scaffold Scfld1, whole genome shotgun sequence. [Roseburia intestinalis L1-82]	254337	386	6335		Faecalibacterium_phage(83.33%)	7	NA	NA
Roseburia_intestinalis_L1-82	GG692714	GG692714 Roseburia intestinalis L1-82 genomic scaffold Scfld1, whole genome shotgun sequence. [Roseburia intestinalis L1-82]	254337	28730	48193	protease	Faecalibacterium_phage(63.16%)	26	NA	NA
Roseburia_intestinalis_L1-82	GG692714	GG692714 Roseburia intestinalis L1-82 genomic scaffold Scfld1, whole genome shotgun sequence. [Roseburia intestinalis L1-82]	254337	238715	254270		Faecalibacterium_phage(43.75%)	25	NA	NA
Roseburia_intestinalis_L1-82	GG692725	GG692725 Roseburia intestinalis L1-82 genomic scaffold Scfld12, whole genome shotgun sequence. [Roseburia intestinalis L1-82]	120451	79238	92338		unidentified_phage(20.0%)	20	NA	NA
Bacteroides_sp._2_2_4	EQ973367	EQ973367 Bacteroides sp. 2_2_4 supercont1.13 genomic scaffold, whole genome shotgun sequence. [Bacteroides sp. 2_2_4]	157014	129531	138363		uncultured_Mediterranean_phage(33.33%)	9	NA	NA
Bacteroides_sp._2_2_4	EQ973358	EQ973358 Bacteroides sp. 2_2_4 supercont1.4 genomic scaffold, whole genome shotgun sequence. [Bacteroides sp. 2_2_4]	590670	446022	459419		unidentified_phage(85.71%)	12	NA	NA
Bacteroides_sp._2_2_4	EQ973359	EQ973359 Bacteroides sp. 2_2_4 supercont1.5 genomic scaffold, whole genome shotgun sequence. [Bacteroides sp. 2_2_4]	589452	301601	311107		Flavobacterium_phage(22.22%)	21	NA	NA
Bacteroides_sp._2_2_4	EQ973359	EQ973359 Bacteroides sp. 2_2_4 supercont1.5 genomic scaffold, whole genome shotgun sequence. [Bacteroides sp. 2_2_4]	589452	496524	503362		Nitratiruptor_phage(16.67%)	10	NA	NA
Bacteroides_sp._2_2_4	EQ973359	EQ973359 Bacteroides sp. 2_2_4 supercont1.5 genomic scaffold, whole genome shotgun sequence. [Bacteroides sp. 2_2_4]	589452	511047	519954		Bacteroides_phage(28.57%)	10	NA	NA
Bacteroides_sp._2_2_4	EQ973378	EQ973378 Bacteroides sp. 2_2_4 supercont1.24 genomic scaffold, whole genome shotgun sequence. [Bacteroides sp. 2_2_4]	38578	19282	27103	protease	unidentified_phage(50.0%)	8	NA	NA
Helicobacter_pylori_GAM249T	KB636081	KB636081 Helicobacter pylori GAM249T genomic scaffold Scfld237, whole genome shotgun sequence. [Helicobacter pylori GAM249T]	102121	63629	74543		uncultured_Caudovirales_phage(33.33%)	9	NA	NA
Helicobacter_pylori_GAM249T	KB636091	KB636091 Helicobacter pylori GAM249T genomic scaffold Scfld43, whole genome shotgun sequence. [Helicobacter pylori GAM249T]	5420	244	4572		Escherichia_phage(100.0%)	6	NA	NA
Citrobacter_freundii_4_7_47CFAA	JH414878	JH414878 Citrobacter freundii 4_7_47CFAA genomic scaffold supercont1.3, whole genome shotgun sequence. [Citrobacter freundii 4_7_47CFAA]	553925	328759	336192		Bacillus_virus(14.29%)	8	NA	NA
Citrobacter_freundii_4_7_47CFAA	JH414878	JH414878 Citrobacter freundii 4_7_47CFAA genomic scaffold supercont1.3, whole genome shotgun sequence. [Citrobacter freundii 4_7_47CFAA]	553925	414483	458804		Enterobacteria_phage(44.9%)	62	NA	NA
Citrobacter_freundii_4_7_47CFAA	JH414878	JH414878 Citrobacter freundii 4_7_47CFAA genomic scaffold supercont1.3, whole genome shotgun sequence. [Citrobacter freundii 4_7_47CFAA]	553925	462284	516223	integrase	Salmonella_phage(40.38%)	73	475333:475352	503021:503040
Citrobacter_freundii_4_7_47CFAA	JH414881	JH414881 Citrobacter freundii 4_7_47CFAA genomic scaffold supercont1.6, whole genome shotgun sequence. [Citrobacter freundii 4_7_47CFAA]	490927	113067	122935	integrase	Enterobacteria_phage(100.0%)	12	112745:112770	123091:123116
Citrobacter_freundii_4_7_47CFAA	JH414885	JH414885 Citrobacter freundii 4_7_47CFAA genomic scaffold supercont1.10, whole genome shotgun sequence. [Citrobacter freundii 4_7_47CFAA]	116848	59147	74038		Enterobacteria_phage(16.67%)	18	NA	NA
Citrobacter_freundii_4_7_47CFAA	JH414886	JH414886 Citrobacter freundii 4_7_47CFAA genomic scaffold supercont1.11, whole genome shotgun sequence. [Citrobacter freundii 4_7_47CFAA]	2632249	986723	995065		Escherichia_phage(44.44%)	12	NA	NA
Citrobacter_freundii_4_7_47CFAA	JH414886	JH414886 Citrobacter freundii 4_7_47CFAA genomic scaffold supercont1.11, whole genome shotgun sequence. [Citrobacter freundii 4_7_47CFAA]	2632249	1009051	1034751	tail	Klebsiella_phage(50.0%)	27	NA	NA
Citrobacter_freundii_4_7_47CFAA	JH414886	JH414886 Citrobacter freundii 4_7_47CFAA genomic scaffold supercont1.11, whole genome shotgun sequence. [Citrobacter freundii 4_7_47CFAA]	2632249	1144675	1154683	tRNA	Brazilian_cedratvirus(28.57%)	10	NA	NA
Citrobacter_freundii_4_7_47CFAA	JH414886	JH414886 Citrobacter freundii 4_7_47CFAA genomic scaffold supercont1.11, whole genome shotgun sequence. [Citrobacter freundii 4_7_47CFAA]	2632249	1742040	1783858		Escherichia_phage(43.75%)	66	NA	NA
Citrobacter_freundii_4_7_47CFAA	JH414886	JH414886 Citrobacter freundii 4_7_47CFAA genomic scaffold supercont1.11, whole genome shotgun sequence. [Citrobacter freundii 4_7_47CFAA]	2632249	1904969	1945881		Salmonella_phage(22.0%)	55	NA	NA
Citrobacter_freundii_4_7_47CFAA	JH414886	JH414886 Citrobacter freundii 4_7_47CFAA genomic scaffold supercont1.11, whole genome shotgun sequence. [Citrobacter freundii 4_7_47CFAA]	2632249	2107383	2116952	protease	Bacillus_phage(28.57%)	8	NA	NA
Citrobacter_freundii_4_7_47CFAA	JH414886	JH414886 Citrobacter freundii 4_7_47CFAA genomic scaffold supercont1.11, whole genome shotgun sequence. [Citrobacter freundii 4_7_47CFAA]	2632249	2155420	2164047	tRNA	Enterobacteria_phage(66.67%)	9	NA	NA
Pediococcus_acidilactici_7_4	GG730089	GG730089 Pediococcus acidilactici 7_4 genomic scaffold supercont1.7, whole genome shotgun sequence. [Pediococcus acidilactici 7_4]	72817	45910	72599		Lactobacillus_phage(45.83%)	44	NA	NA
Pediococcus_acidilactici_7_4	GG730087	GG730087 Pediococcus acidilactici 7_4 genomic scaffold supercont1.5, whole genome shotgun sequence. [Pediococcus acidilactici 7_4]	266599	19636	28199		Synechococcus_phage(33.33%)	9	NA	NA
Pediococcus_acidilactici_7_4	GG730087	GG730087 Pediococcus acidilactici 7_4 genomic scaffold supercont1.5, whole genome shotgun sequence. [Pediococcus acidilactici 7_4]	266599	54015	61337		Staphylococcus_phage(28.57%)	7	NA	NA
Pediococcus_acidilactici_7_4	GG730087	GG730087 Pediococcus acidilactici 7_4 genomic scaffold supercont1.5, whole genome shotgun sequence. [Pediococcus acidilactici 7_4]	266599	130928	165513	protease	Lactobacillus_phage(83.87%)	52	NA	NA
Pediococcus_acidilactici_7_4	GG730085	GG730085 Pediococcus acidilactici 7_4 genomic scaffold supercont1.3, whole genome shotgun sequence. [Pediococcus acidilactici 7_4]	384055	70300	79785		Enterococcus_phage(33.33%)	8	NA	NA
Pediococcus_acidilactici_7_4	GG730085	GG730085 Pediococcus acidilactici 7_4 genomic scaffold supercont1.3, whole genome shotgun sequence. [Pediococcus acidilactici 7_4]	384055	142781	150338		Bacillus_phage(33.33%)	8	NA	NA
Pediococcus_acidilactici_7_4	GG730086	GG730086 Pediococcus acidilactici 7_4 genomic scaffold supercont1.4, whole genome shotgun sequence. [Pediococcus acidilactici 7_4]	315355	13709	22509		Bacillus_virus(14.29%)	9	NA	NA
Pediococcus_acidilactici_7_4	GG730086	GG730086 Pediococcus acidilactici 7_4 genomic scaffold supercont1.4, whole genome shotgun sequence. [Pediococcus acidilactici 7_4]	315355	260132	269252	tRNA	Streptococcus_phage(33.33%)	10	NA	NA
Escherichia_coli_MS_117-3	GG772903	GG772903 Escherichia coli MS 117-3 genomic scaffold Scfld676, whole genome shotgun sequence. [Escherichia coli MS 117-3]	179129	165156	175117	tRNA,protease	Aureococcus_anophage(16.67%)	8	NA	NA
Escherichia_coli_MS_117-3	GG772866	GG772866 Escherichia coli MS 117-3 genomic scaffold Scfld439, whole genome shotgun sequence. [Escherichia coli MS 117-3]	197411	100861	107156		Escherichia_phage(50.0%)	6	NA	NA
Escherichia_coli_MS_117-3	GG772866	GG772866 Escherichia coli MS 117-3 genomic scaffold Scfld439, whole genome shotgun sequence. [Escherichia coli MS 117-3]	197411	126477	136585	tRNA	Mycoplasma_phage(14.29%)	12	NA	NA
Escherichia_coli_MS_117-3	GG772852	GG772852 Escherichia coli MS 117-3 genomic scaffold Scfld367, whole genome shotgun sequence. [Escherichia coli MS 117-3]	94100	18901	54509	tail	Escherichia_phage(50.0%)	44	NA	NA
Escherichia_coli_MS_117-3	GG772909	GG772909 Escherichia coli MS 117-3 genomic scaffold Scfld718, whole genome shotgun sequence. [Escherichia coli MS 117-3]	26311	17006	25967		Burkholderia_phage(33.33%)	11	NA	NA
Escherichia_coli_MS_117-3	GG772933	GG772933 Escherichia coli MS 117-3 genomic scaffold Scfld970, whole genome shotgun sequence. [Escherichia coli MS 117-3]	15437	529	15338		Enterobacteria_phage(61.11%)	18	NA	NA
Escherichia_coli_MS_117-3	GG772823	GG772823 Escherichia coli MS 117-3 genomic scaffold Scfld176, whole genome shotgun sequence. [Escherichia coli MS 117-3]	16452	515	13194	transposase,protease	Enterobacteria_phage(57.14%)	9	NA	NA
Escherichia_coli_MS_117-3	GG772979	GG772979 Escherichia coli MS 117-3 genomic scaffold Scfld2331, whole genome shotgun sequence. [Escherichia coli MS 117-3]	98655	19684	29208		Enterobacteria_phage(75.0%)	10	NA	NA
Escherichia_coli_MS_117-3	GG772921	GG772921 Escherichia coli MS 117-3 genomic scaffold Scfld832, whole genome shotgun sequence. [Escherichia coli MS 117-3]	8735	6	8584	integrase	Escherichia_phage(50.0%)	11	2599:2610	5062:5073
Escherichia_coli_MS_117-3	GG772847	GG772847 Escherichia coli MS 117-3 genomic scaffold Scfld319, whole genome shotgun sequence. [Escherichia coli MS 117-3]	32604	24512	32365		Bradyrhizobium_phage(16.67%)	9	NA	NA
Escherichia_coli_MS_117-3	GG772948	GG772948 Escherichia coli MS 117-3 genomic scaffold Scfld1107, whole genome shotgun sequence. [Escherichia coli MS 117-3]	63191	39379	46519		Escherichia_phage(83.33%)	6	NA	NA
Escherichia_coli_MS_117-3	GG772977	GG772977 Escherichia coli MS 117-3 genomic scaffold Scfld2182, whole genome shotgun sequence. [Escherichia coli MS 117-3]	3681	132	3296		Escherichia_phage(50.0%)	6	NA	NA
Escherichia_coli_MS_117-3	GG772892	GG772892 Escherichia coli MS 117-3 genomic scaffold Scfld576, whole genome shotgun sequence. [Escherichia coli MS 117-3]	78400	48897	67754		Enterobacteria_phage(25.0%)	24	NA	NA
Escherichia_coli_MS_117-3	GG772957	GG772957 Escherichia coli MS 117-3 genomic scaffold Scfld1282, whole genome shotgun sequence. [Escherichia coli MS 117-3]	171621	76527	87439		Hokovirus(14.29%)	11	NA	NA
Escherichia_coli_MS_117-3	GG772870	GG772870 Escherichia coli MS 117-3 genomic scaffold Scfld491, whole genome shotgun sequence. [Escherichia coli MS 117-3]	85500	19161	65828		Enterobacteria_phage(60.32%)	65	NA	NA
Escherichia_coli_MS_117-3	GG772888	GG772888 Escherichia coli MS 117-3 genomic scaffold Scfld572, whole genome shotgun sequence. [Escherichia coli MS 117-3]	23867	15586	23220	transposase,protease	Shigella_phage(33.33%)	6	NA	NA
Escherichia_coli_MS_117-3	GG772858	GG772858 Escherichia coli MS 117-3 genomic scaffold Scfld401, whole genome shotgun sequence. [Escherichia coli MS 117-3]	74791	55083	70129	integrase	Enterobacteria_phage(90.0%)	15	49947:49959	72247:72259
Slackia_piriformis_YIT_12062	JH815198	JH815198 Slackia piriformis YIT 12062 genomic scaffold supercont1.1, whole genome shotgun sequence. [Slackia piriformis YIT 12062]	1804830	461396	470392		Streptococcus_phage(16.67%)	7	NA	NA
Faecalibacterium_prausnitzii_A2-165	GG697157	GG697157 Faecalibacterium prausnitzii A2-165 genomic scaffold Scfld8, whole genome shotgun sequence. [Faecalibacterium prausnitzii A2-165]	134657	77036	112630		Faecalibacterium_phage(100.0%)	53	NA	NA
Faecalibacterium_prausnitzii_A2-165	GG697149	GG697149 Faecalibacterium prausnitzii A2-165 genomic scaffold Scfld0, whole genome shotgun sequence. [Faecalibacterium prausnitzii A2-165]	639232	73718	80908		Streptococcus_phage(42.86%)	9	NA	NA
Faecalibacterium_prausnitzii_A2-165	GG697149	GG697149 Faecalibacterium prausnitzii A2-165 genomic scaffold Scfld0, whole genome shotgun sequence. [Faecalibacterium prausnitzii A2-165]	639232	369387	378726		Streptococcus_phage(28.57%)	9	NA	NA
Faecalibacterium_prausnitzii_A2-165	GG697149	GG697149 Faecalibacterium prausnitzii A2-165 genomic scaffold Scfld0, whole genome shotgun sequence. [Faecalibacterium prausnitzii A2-165]	639232	443823	452236		Acinetobacter_phage(16.67%)	11	NA	NA
Faecalibacterium_prausnitzii_A2-165	GG697152	GG697152 Faecalibacterium prausnitzii A2-165 genomic scaffold Scfld3, whole genome shotgun sequence. [Faecalibacterium prausnitzii A2-165]	413561	49730	59658		Streptococcus_phage(42.86%)	11	NA	NA
Faecalibacterium_prausnitzii_A2-165	GG697152	GG697152 Faecalibacterium prausnitzii A2-165 genomic scaffold Scfld3, whole genome shotgun sequence. [Faecalibacterium prausnitzii A2-165]	413561	74278	81123		Streptococcus_phage(16.67%)	9	NA	NA
Faecalibacterium_prausnitzii_A2-165	GG697151	GG697151 Faecalibacterium prausnitzii A2-165 genomic scaffold Scfld2, whole genome shotgun sequence. [Faecalibacterium prausnitzii A2-165]	555491	24138	32165	tRNA	Prochlorococcus_phage(33.33%)	8	NA	NA
Faecalibacterium_prausnitzii_A2-165	GG697151	GG697151 Faecalibacterium prausnitzii A2-165 genomic scaffold Scfld2, whole genome shotgun sequence. [Faecalibacterium prausnitzii A2-165]	555491	106142	112642		Tetraselmis_viridis_virus(14.29%)	8	NA	NA
Faecalibacterium_prausnitzii_A2-165	GG697151	GG697151 Faecalibacterium prausnitzii A2-165 genomic scaffold Scfld2, whole genome shotgun sequence. [Faecalibacterium prausnitzii A2-165]	555491	472954	521080	protease,transposase	Faecalibacterium_phage(96.92%)	66	NA	NA
Bacteroides_ovatus_ATCC_8483	DS264583	DS264583 Bacteroides ovatus ATCC 8483 Scfld0230 genomic scaffold, whole genome shotgun sequence. [Bacteroides ovatus ATCC 8483]	555155	38783	48095		Liberibacter_phage(66.67%)	6	NA	NA
Bacteroides_ovatus_ATCC_8483	DS264582	DS264582 Bacteroides ovatus ATCC 8483 Scfld0229 genomic scaffold, whole genome shotgun sequence. [Bacteroides ovatus ATCC 8483]	491071	228043	249524		Clostridium_phage(16.67%)	35	NA	NA
Enterococcus_faecalis_TX1467	GL883996	GL883996 Enterococcus faecalis TX1467 genomic scaffold Scfld122, whole genome shotgun sequence. [Enterococcus faecalis TX1467]	28604	42	12390		Streptococcus_phage(80.0%)	12	NA	NA
Enterococcus_faecalis_TX1467	GL884097	GL884097 Enterococcus faecalis TX1467 genomic scaffold Scfld1648, whole genome shotgun sequence. [Enterococcus faecalis TX1467]	145567	27574	39587		Enterococcus_phage(45.45%)	14	NA	NA
Enterococcus_faecalis_TX1467	GL884097	GL884097 Enterococcus faecalis TX1467 genomic scaffold Scfld1648, whole genome shotgun sequence. [Enterococcus faecalis TX1467]	145567	42760	50556		Enterococcus_phage(57.14%)	10	NA	NA
Enterococcus_faecalis_TX1467	GL884097	GL884097 Enterococcus faecalis TX1467 genomic scaffold Scfld1648, whole genome shotgun sequence. [Enterococcus faecalis TX1467]	145567	53736	65260		Enterococcus_phage(82.35%)	24	NA	NA
Enterococcus_faecalis_TX1467	GL884025	GL884025 Enterococcus faecalis TX1467 genomic scaffold Scfld303, whole genome shotgun sequence. [Enterococcus faecalis TX1467]	129381	93457	111226		Enterococcus_phage(42.86%)	22	NA	NA
Enterococcus_faecalis_TX1467	GL884075	GL884075 Enterococcus faecalis TX1467 genomic scaffold Scfld675, whole genome shotgun sequence. [Enterococcus faecalis TX1467]	411065	8968	17611		Synechococcus_phage(50.0%)	10	NA	NA
Enterococcus_faecalis_TX1467	GL884075	GL884075 Enterococcus faecalis TX1467 genomic scaffold Scfld675, whole genome shotgun sequence. [Enterococcus faecalis TX1467]	411065	135828	143048	tRNA	Chrysochromulina_ericina_virus(16.67%)	8	NA	NA
Enterococcus_faecalis_TX1467	GL883984	GL883984 Enterococcus faecalis TX1467 genomic scaffold Scfld48, whole genome shotgun sequence. [Enterococcus faecalis TX1467]	84279	27464	34099		Pandoravirus(33.33%)	7	NA	NA
Enterococcus_faecalis_TX1467	GL883991	GL883991 Enterococcus faecalis TX1467 genomic scaffold Scfld98, whole genome shotgun sequence. [Enterococcus faecalis TX1467]	79341	66038	73365	transposase	Planktothrix_phage(33.33%)	13	NA	NA
Enterococcus_faecalis_TX1467	GL884054	GL884054 Enterococcus faecalis TX1467 genomic scaffold Scfld497, whole genome shotgun sequence. [Enterococcus faecalis TX1467]	86537	25988	33102		Enterococcus_phage(25.0%)	11	NA	NA
Enterococcus_faecalis_TX1467	GL883995	GL883995 Enterococcus faecalis TX1467 genomic scaffold Scfld119, whole genome shotgun sequence. [Enterococcus faecalis TX1467]	44276	29996	43979	protease	Streptococcus_phage(92.31%)	15	NA	NA
Enterococcus_faecalis_TX1467	GL883987	GL883987 Enterococcus faecalis TX1467 genomic scaffold Scfld63, whole genome shotgun sequence. [Enterococcus faecalis TX1467]	20173	3551	12338	transposase	Bacillus_phage(50.0%)	10	NA	NA
Enterococcus_faecalis_TX1467	GL884017	GL884017 Enterococcus faecalis TX1467 genomic scaffold Scfld237, whole genome shotgun sequence. [Enterococcus faecalis TX1467]	15164	7886	15163		Enterococcus_phage(33.33%)	7	NA	NA
Desulfovibrio_sp._6_1_46AFAA	JH114303	JH114303 Desulfovibrio sp. 6_1_46AFAA genomic scaffold supercont1.4, whole genome shotgun sequence. [Desulfovibrio sp. 6_1_46AFAA]	632527	323456	349976		Acinetobacter_phage(26.09%)	36	NA	NA
Desulfovibrio_sp._6_1_46AFAA	JH114302	JH114302 Desulfovibrio sp. 6_1_46AFAA genomic scaffold supercont1.3, whole genome shotgun sequence. [Desulfovibrio sp. 6_1_46AFAA]	728240	97286	110565	tRNA	Bacillus_phage(28.57%)	10	NA	NA
Desulfovibrio_sp._6_1_46AFAA	JH114302	JH114302 Desulfovibrio sp. 6_1_46AFAA genomic scaffold supercont1.3, whole genome shotgun sequence. [Desulfovibrio sp. 6_1_46AFAA]	728240	181364	198503		Acidithiobacillus_phage(30.77%)	20	NA	NA
Desulfovibrio_sp._6_1_46AFAA	JH114302	JH114302 Desulfovibrio sp. 6_1_46AFAA genomic scaffold supercont1.3, whole genome shotgun sequence. [Desulfovibrio sp. 6_1_46AFAA]	728240	627943	641020		Clanis_bilineata_nucleopolyhedrovirus(11.11%)	11	NA	NA
Desulfovibrio_sp._6_1_46AFAA	JH114300	JH114300 Desulfovibrio sp. 6_1_46AFAA genomic scaffold supercont1.1, whole genome shotgun sequence. [Desulfovibrio sp. 6_1_46AFAA]	856981	157704	168053		Pseudomonas_phage(12.5%)	20	NA	NA
Desulfovibrio_sp._6_1_46AFAA	JH114300	JH114300 Desulfovibrio sp. 6_1_46AFAA genomic scaffold supercont1.1, whole genome shotgun sequence. [Desulfovibrio sp. 6_1_46AFAA]	856981	173009	180802		Escherichia_coli_O157_typing_phage(33.33%)	11	NA	NA
Desulfovibrio_sp._6_1_46AFAA	JH114300	JH114300 Desulfovibrio sp. 6_1_46AFAA genomic scaffold supercont1.1, whole genome shotgun sequence. [Desulfovibrio sp. 6_1_46AFAA]	856981	258510	266922		Enterobacteria_phage(28.57%)	7	NA	NA
Desulfovibrio_sp._6_1_46AFAA	JH114300	JH114300 Desulfovibrio sp. 6_1_46AFAA genomic scaffold supercont1.1, whole genome shotgun sequence. [Desulfovibrio sp. 6_1_46AFAA]	856981	772178	785795	tRNA	Staphylococcus_phage(33.33%)	13	NA	NA
Desulfovibrio_sp._6_1_46AFAA	JH114306	JH114306 Desulfovibrio sp. 6_1_46AFAA genomic scaffold supercont1.7, whole genome shotgun sequence. [Desulfovibrio sp. 6_1_46AFAA]	113645	61886	84509		Mesorhizobium_phage(15.79%)	26	NA	NA
Desulfovibrio_sp._6_1_46AFAA	JH114304	JH114304 Desulfovibrio sp. 6_1_46AFAA genomic scaffold supercont1.5, whole genome shotgun sequence. [Desulfovibrio sp. 6_1_46AFAA]	506472	99093	108218		Cellulophaga_phage(16.67%)	11	NA	NA
Desulfovibrio_sp._6_1_46AFAA	JH114301	JH114301 Desulfovibrio sp. 6_1_46AFAA genomic scaffold supercont1.2, whole genome shotgun sequence. [Desulfovibrio sp. 6_1_46AFAA]	778404	188609	201207		uncultured_Caudovirales_phage(33.33%)	13	NA	NA
Desulfovibrio_sp._6_1_46AFAA	JH114301	JH114301 Desulfovibrio sp. 6_1_46AFAA genomic scaffold supercont1.2, whole genome shotgun sequence. [Desulfovibrio sp. 6_1_46AFAA]	778404	205326	228762		Pseudomonas_phage(22.22%)	33	NA	NA
Desulfovibrio_sp._6_1_46AFAA	JH114301	JH114301 Desulfovibrio sp. 6_1_46AFAA genomic scaffold supercont1.2, whole genome shotgun sequence. [Desulfovibrio sp. 6_1_46AFAA]	778404	291714	300580		Acidithiobacillus_phage(33.33%)	8	NA	NA
Roseburia_inulinivorans_DSM_16841	ACFY01000144	ACFY01000144 Roseburia inulinivorans DSM 16841 R_inulinivorans-1.0.1_Cont541.1, whole genome shotgun sequence. [Roseburia inulinivorans DSM 16841]	57312	22778	36223	protease,transposase	Clostridium_botulinum_C_phage(25.0%)	13	NA	NA
Roseburia_inulinivorans_DSM_16841	ACFY01000031	ACFY01000031 Roseburia inulinivorans DSM 16841 R_inulinivorans-1.0.1_Cont39.1, whole genome shotgun sequence. [Roseburia inulinivorans DSM 16841]	85784	354	7689		Streptococcus_phage(50.0%)	8	NA	NA
Roseburia_inulinivorans_DSM_16841	ACFY01000048	ACFY01000048 Roseburia inulinivorans DSM 16841 R_inulinivorans-1.0.1_Cont60.1, whole genome shotgun sequence. [Roseburia inulinivorans DSM 16841]	31095	7397	16474		Streptococcus_phage(33.33%)	8	NA	NA
Roseburia_inulinivorans_DSM_16841	ACFY01000167	ACFY01000167 Roseburia inulinivorans DSM 16841 R_inulinivorans-1.0.1_Cont582.1, whole genome shotgun sequence. [Roseburia inulinivorans DSM 16841]	21822	6297	14710		Only_Syngen_Nebraska_virus(16.67%)	11	NA	NA
Roseburia_inulinivorans_DSM_16841	ACFY01000140	ACFY01000140 Roseburia inulinivorans DSM 16841 R_inulinivorans-1.0.1_Cont536.1, whole genome shotgun sequence. [Roseburia inulinivorans DSM 16841]	49629	31174	42703		Streptococcus_phage(42.86%)	8	NA	NA
Roseburia_inulinivorans_DSM_16841	ACFY01000004	ACFY01000004 Roseburia inulinivorans DSM 16841 R_inulinivorans-1.0.1_Cont4.1, whole genome shotgun sequence. [Roseburia inulinivorans DSM 16841]	61552	44009	51806		unidentified_phage(28.57%)	10	NA	NA
Roseburia_inulinivorans_DSM_16841	ACFY01000096	ACFY01000096 Roseburia inulinivorans DSM 16841 R_inulinivorans-1.0.1_Cont437.1, whole genome shotgun sequence. [Roseburia inulinivorans DSM 16841]	131535	107791	116723		Enterobacteria_phage(33.33%)	7	NA	NA
Clostridiales_butyrate-producing_bacterium_SM4_1	FP929060	FP929060 Clostridiales sp. SM4/1 draft genome. [Clostridiales butyrate-producing bacterium SM4/1]	3108859	637105	652300	protease	Erysipelothrix_phage(46.67%)	23	NA	NA
Clostridiales_butyrate-producing_bacterium_SM4_1	FP929060	FP929060 Clostridiales sp. SM4/1 draft genome. [Clostridiales butyrate-producing bacterium SM4/1]	3108859	1919871	1938379		Streptomyces_phage(30.77%)	21	NA	NA
Clostridiales_butyrate-producing_bacterium_SM4_1	FP929060	FP929060 Clostridiales sp. SM4/1 draft genome. [Clostridiales butyrate-producing bacterium SM4/1]	3108859	1956081	1960620		Rhodococcus_phage(33.33%)	8	NA	NA
Finegoldia_magna_ATCC_29328	AP008971	AP008971 Finegoldia magna ATCC 29328 DNA, complete genome. [Finegoldia magna ATCC 29328]	1797577	715050	723196		Planktothrix_phage(16.67%)	9	NA	NA
Finegoldia_magna_ATCC_29328	AP008971	AP008971 Finegoldia magna ATCC 29328 DNA, complete genome. [Finegoldia magna ATCC 29328]	1797577	773864	781926		Catovirus(33.33%)	9	NA	NA
Finegoldia_magna_ATCC_29328	AP008971	AP008971 Finegoldia magna ATCC 29328 DNA, complete genome. [Finegoldia magna ATCC 29328]	1797577	880237	891815	tRNA	Bacillus_phage(25.0%)	11	NA	NA
Finegoldia_magna_ATCC_29328	AP008972	AP008972 Finegoldia magna ATCC 29328 plasmid pFMC DNA, complete sequence. [Finegoldia magna ATCC 29328]	189163	77240	154999	transposase	Bacillus_virus(18.18%)	54	NA	NA
Clostridiales_Bacteroides_pectinophilus_ATCC_43243	DS996921	DS996921 [Bacteroides] pectinophilus ATCC 43243 Scfld_02_1 genomic scaffold, whole genome shotgun sequence. [Clostridiales [Bacteroides] pectinophilus ATCC 43243]	2528381	91162	99013		Enterobacteria_phage(50.0%)	9	NA	NA
Clostridiales_Bacteroides_pectinophilus_ATCC_43243	DS996921	DS996921 [Bacteroides] pectinophilus ATCC 43243 Scfld_02_1 genomic scaffold, whole genome shotgun sequence. [Clostridiales [Bacteroides] pectinophilus ATCC 43243]	2528381	592358	601495		uncultured_Caudovirales_phage(37.5%)	13	NA	NA
Clostridiales_Bacteroides_pectinophilus_ATCC_43243	DS996921	DS996921 [Bacteroides] pectinophilus ATCC 43243 Scfld_02_1 genomic scaffold, whole genome shotgun sequence. [Clostridiales [Bacteroides] pectinophilus ATCC 43243]	2528381	994350	1025643	protease	Streptococcus_phage(44.83%)	43	NA	NA
Clostridiales_Bacteroides_pectinophilus_ATCC_43243	DS996921	DS996921 [Bacteroides] pectinophilus ATCC 43243 Scfld_02_1 genomic scaffold, whole genome shotgun sequence. [Clostridiales [Bacteroides] pectinophilus ATCC 43243]	2528381	1030838	1040338		Streptococcus_phage(50.0%)	10	NA	NA
Clostridiales_Bacteroides_pectinophilus_ATCC_43243	DS996921	DS996921 [Bacteroides] pectinophilus ATCC 43243 Scfld_02_1 genomic scaffold, whole genome shotgun sequence. [Clostridiales [Bacteroides] pectinophilus ATCC 43243]	2528381	2420099	2436496		Clostridium_phage(58.33%)	23	NA	NA
Helicobacter_pylori_GAM201Ai	KB641871	KB641871 Helicobacter pylori GAM201Ai genomic scaffold Scfld1, whole genome shotgun sequence. [Helicobacter pylori GAM201Ai]	5418	46	5322		Escherichia_phage(100.0%)	7	NA	NA
Fusobacterium_periodonticum_2_1_31	KN173677	KN173677 Fusobacterium periodonticum 2_1_31 genomic scaffold acIQb-supercont3.1, whole genome shotgun sequence. [Fusobacterium periodonticum 2_1_31]	980607	673998	683557		Synechococcus_phage(28.57%)	7	NA	NA
Fusobacterium_periodonticum_2_1_31	KN173681	KN173681 Fusobacterium periodonticum 2_1_31 genomic scaffold acIQb-supercont3.5, whole genome shotgun sequence. [Fusobacterium periodonticum 2_1_31]	157175	39830	56723		Fusobacterium_phage(42.86%)	25	NA	NA
Fusobacterium_periodonticum_2_1_31	KN173681	KN173681 Fusobacterium periodonticum 2_1_31 genomic scaffold acIQb-supercont3.5, whole genome shotgun sequence. [Fusobacterium periodonticum 2_1_31]	157175	61907	84014	protease	Vibrio_phage(17.65%)	32	NA	NA
Fusobacterium_periodonticum_2_1_31	KN173678	KN173678 Fusobacterium periodonticum 2_1_31 genomic scaffold acIQb-supercont3.2, whole genome shotgun sequence. [Fusobacterium periodonticum 2_1_31]	810876	384398	394197		Tupanvirus(16.67%)	8	NA	NA
Fusobacterium_periodonticum_2_1_31	KN173678	KN173678 Fusobacterium periodonticum 2_1_31 genomic scaffold acIQb-supercont3.2, whole genome shotgun sequence. [Fusobacterium periodonticum 2_1_31]	810876	582419	590834	transposase	Bacillus_virus(33.33%)	6	NA	NA
Bacteroides_ovatus_3_8_47FAA	GL945020	GL945020 Bacteroides ovatus 3_8_47FAA genomic scaffold supercont1.3, whole genome shotgun sequence. [Bacteroides ovatus 3_8_47FAA]	801465	158538	168082		unidentified_phage(62.5%)	10	NA	NA
Bacteroides_ovatus_3_8_47FAA	GL945019	GL945019 Bacteroides ovatus 3_8_47FAA genomic scaffold supercont1.2, whole genome shotgun sequence. [Bacteroides ovatus 3_8_47FAA]	911794	35122	48938		uncultured_Mediterranean_phage(22.22%)	15	NA	NA
Bacteroides_ovatus_3_8_47FAA	GL945019	GL945019 Bacteroides ovatus 3_8_47FAA genomic scaffold supercont1.2, whole genome shotgun sequence. [Bacteroides ovatus 3_8_47FAA]	911794	281151	294033		unidentified_phage(87.5%)	15	NA	NA
Bacteroides_ovatus_3_8_47FAA	GL945019	GL945019 Bacteroides ovatus 3_8_47FAA genomic scaffold supercont1.2, whole genome shotgun sequence. [Bacteroides ovatus 3_8_47FAA]	911794	298365	311761		unidentified_phage(85.71%)	12	NA	NA
Gordonibacter_pamelaeae_7-10-1-b	FP929047	FP929047 Gordonibacter pamelaeae 7-10-1-b draft genome. [Gordonibacter pamelaeae 7-10-1-b]	3608022	2271615	2281205		Mycobacterium_phage(25.0%)	17	NA	NA
Dermabacter_sp._HFH0086	KE340308	KE340308 Dermabacter sp. HFH0086 genomic scaffold acArI-supercont-complete, whole genome shotgun sequence. [Dermabacter sp. HFH0086]	2377736	241039	249173		Arthrobacter_phage(57.14%)	11	NA	NA
Dermabacter_sp._HFH0086	KE340308	KE340308 Dermabacter sp. HFH0086 genomic scaffold acArI-supercont-complete, whole genome shotgun sequence. [Dermabacter sp. HFH0086]	2377736	2193899	2204925		Brevibacterium_phage(50.0%)	16	NA	NA
Dermabacter_sp._HFH0086	KE340308	KE340308 Dermabacter sp. HFH0086 genomic scaffold acArI-supercont-complete, whole genome shotgun sequence. [Dermabacter sp. HFH0086]	2377736	2224512	2231849		Orpheovirus(37.5%)	9	NA	NA
Lactobacillus_delbrueckii_subsp._lactis_DSM_20072	GL872382	GL872382 Lactobacillus delbrueckii subsp. lactis DSM 20072 genomic scaffold SCAFFOLD1, whole genome shotgun sequence. [Lactobacillus delbrueckii subsp. lactis DSM 20072]	2038844	275244	285624	tRNA,protease	Erwinia_phage(16.67%)	10	NA	NA
Lactobacillus_delbrueckii_subsp._lactis_DSM_20072	GL872382	GL872382 Lactobacillus delbrueckii subsp. lactis DSM 20072 genomic scaffold SCAFFOLD1, whole genome shotgun sequence. [Lactobacillus delbrueckii subsp. lactis DSM 20072]	2038844	429904	438476		Prochlorococcus_phage(33.33%)	8	NA	NA
Lactobacillus_delbrueckii_subsp._lactis_DSM_20072	GL872382	GL872382 Lactobacillus delbrueckii subsp. lactis DSM 20072 genomic scaffold SCAFFOLD1, whole genome shotgun sequence. [Lactobacillus delbrueckii subsp. lactis DSM 20072]	2038844	946196	953811		Streptomyces_phage(33.33%)	7	NA	NA
Lactobacillus_delbrueckii_subsp._lactis_DSM_20072	GL872382	GL872382 Lactobacillus delbrueckii subsp. lactis DSM 20072 genomic scaffold SCAFFOLD1, whole genome shotgun sequence. [Lactobacillus delbrueckii subsp. lactis DSM 20072]	2038844	1426314	1439093		Phaeocystis_globosa_virus(30.0%)	13	NA	NA
Lactobacillus_delbrueckii_subsp._lactis_DSM_20072	GL872382	GL872382 Lactobacillus delbrueckii subsp. lactis DSM 20072 genomic scaffold SCAFFOLD1, whole genome shotgun sequence. [Lactobacillus delbrueckii subsp. lactis DSM 20072]	2038844	1946010	1956725		Streptococcus_phage(66.67%)	11	NA	NA
Yokenella_regensburgei_ATCC_43003	JH417865	JH417865 Yokenella regensburgei ATCC 43003 genomic scaffold Scfld10, whole genome shotgun sequence. [Yokenella regensburgei ATCC 43003]	201704	10843	18195		Bacillus_virus(16.67%)	8	NA	NA
Yokenella_regensburgei_ATCC_43003	JH417865	JH417865 Yokenella regensburgei ATCC 43003 genomic scaffold Scfld10, whole genome shotgun sequence. [Yokenella regensburgei ATCC 43003]	201704	103798	141173	tail,integrase	Salmonella_phage(84.44%)	47	95533:95547	126636:126650
Yokenella_regensburgei_ATCC_43003	JH417865	JH417865 Yokenella regensburgei ATCC 43003 genomic scaffold Scfld10, whole genome shotgun sequence. [Yokenella regensburgei ATCC 43003]	201704	165820	190646	tail	Escherichia_phage(32.26%)	35	NA	NA
Yokenella_regensburgei_ATCC_43003	JH417874	JH417874 Yokenella regensburgei ATCC 43003 genomic scaffold Scfld157, whole genome shotgun sequence. [Yokenella regensburgei ATCC 43003]	2596006	53292	59080		uncultured_Caudovirales_phage(57.14%)	8	NA	NA
Yokenella_regensburgei_ATCC_43003	JH417874	JH417874 Yokenella regensburgei ATCC 43003 genomic scaffold Scfld157, whole genome shotgun sequence. [Yokenella regensburgei ATCC 43003]	2596006	614429	642716	tail	Cronobacter_phage(75.76%)	36	NA	NA
Yokenella_regensburgei_ATCC_43003	JH417874	JH417874 Yokenella regensburgei ATCC 43003 genomic scaffold Scfld157, whole genome shotgun sequence. [Yokenella regensburgei ATCC 43003]	2596006	1868872	1916934		Salmonella_phage(23.33%)	70	NA	NA
Yokenella_regensburgei_ATCC_43003	JH417874	JH417874 Yokenella regensburgei ATCC 43003 genomic scaffold Scfld157, whole genome shotgun sequence. [Yokenella regensburgei ATCC 43003]	2596006	1929987	1940293		Burkholderia_phage(28.57%)	11	NA	NA
Paraprevotella_clara_YIT_11840	JH376608	JH376608 Paraprevotella clara YIT 11840 genomic scaffold Scfld71, whole genome shotgun sequence. [Paraprevotella clara YIT 11840]	37242	6471	16641	tRNA	uncultured_Mediterranean_phage(16.67%)	8	NA	NA
Coprobacillus_sp._D7	KI392010	KI392010 Coprobacillus sp. D7 genomic scaffold supercont2.18, whole genome shotgun sequence. [Coprobacillus sp. D7]	115313	10159	27676		Streptococcus_phage(86.67%)	19	NA	NA
Coprobacillus_sp._D7	KI392029	KI392029 Coprobacillus sp. D7 genomic scaffold supercont2.37, whole genome shotgun sequence. [Coprobacillus sp. D7]	489452	12817	27484		Paenibacillus_phage(36.36%)	22	NA	NA
Coprobacillus_sp._D7	KI392029	KI392029 Coprobacillus sp. D7 genomic scaffold supercont2.37, whole genome shotgun sequence. [Coprobacillus sp. D7]	489452	31146	48686		Lactococcus_phage(18.75%)	21	NA	NA
Coprobacillus_sp._D7	KI392029	KI392029 Coprobacillus sp. D7 genomic scaffold supercont2.37, whole genome shotgun sequence. [Coprobacillus sp. D7]	489452	237285	242577		uncultured_phage(28.57%)	7	NA	NA
Coprobacillus_sp._D7	KI392000	KI392000 Coprobacillus sp. D7 genomic scaffold supercont2.8, whole genome shotgun sequence. [Coprobacillus sp. D7]	55655	36755	51014		Streptococcus_pyogenes_phage(50.0%)	9	NA	NA
Coprobacillus_sp._D7	KI391998	KI391998 Coprobacillus sp. D7 genomic scaffold supercont2.6, whole genome shotgun sequence. [Coprobacillus sp. D7]	58579	12172	25070		Synechococcus_phage(42.86%)	10	NA	NA
Parasutterella_excrementihominis_YIT_11859	GL883755	GL883755 Parasutterella excrementihominis YIT 11859 genomic scaffold Scfld238, whole genome shotgun sequence. [Parasutterella excrementihominis YIT 11859]	58385	1747	14431	tRNA	Synechococcus_phage(22.22%)	12	NA	NA
Parasutterella_excrementihominis_YIT_11859	GL883745	GL883745 Parasutterella excrementihominis YIT 11859 genomic scaffold Scfld175, whole genome shotgun sequence. [Parasutterella excrementihominis YIT 11859]	66481	23186	30432		Enterobacteria_phage(50.0%)	8	NA	NA
Parasutterella_excrementihominis_YIT_11859	GL883695	GL883695 Parasutterella excrementihominis YIT 11859 genomic scaffold Scfld27, whole genome shotgun sequence. [Parasutterella excrementihominis YIT 11859]	77112	45674	67872		Aeromonas_phage(20.0%)	28	NA	NA
Parasutterella_excrementihominis_YIT_11859	GL883756	GL883756 Parasutterella excrementihominis YIT 11859 genomic scaffold Scfld271, whole genome shotgun sequence. [Parasutterella excrementihominis YIT 11859]	108444	73072	80285		Staphylococcus_phage(33.33%)	8	NA	NA
Fusobacterium_mortiferum_ATCC_9817	GL987991	GL987991 Fusobacterium mortiferum ATCC 9817 genomic scaffold supercont2.5, whole genome shotgun sequence. [Fusobacterium mortiferum ATCC 9817]	250110	65708	77024		Clostridium_phage(20.0%)	17	NA	NA
Fusobacterium_mortiferum_ATCC_9817	GL987994	GL987994 Fusobacterium mortiferum ATCC 9817 genomic scaffold supercont2.8, whole genome shotgun sequence. [Fusobacterium mortiferum ATCC 9817]	754930	501926	511704		Prochlorococcus_phage(28.57%)	7	NA	NA
Fusobacterium_mortiferum_ATCC_9817	GL987988	GL987988 Fusobacterium mortiferum ATCC 9817 genomic scaffold supercont2.2, whole genome shotgun sequence. [Fusobacterium mortiferum ATCC 9817]	1099302	201266	210863		Staphylococcus_phage(42.86%)	8	NA	NA
Fusobacterium_mortiferum_ATCC_9817	GL987988	GL987988 Fusobacterium mortiferum ATCC 9817 genomic scaffold supercont2.2, whole genome shotgun sequence. [Fusobacterium mortiferum ATCC 9817]	1099302	618585	626981	protease	Clostridium_phage(57.14%)	11	NA	NA
Fusobacterium_mortiferum_ATCC_9817	GL987988	GL987988 Fusobacterium mortiferum ATCC 9817 genomic scaffold supercont2.2, whole genome shotgun sequence. [Fusobacterium mortiferum ATCC 9817]	1099302	634834	642873		Fusobacterium_phage(16.67%)	11	NA	NA
Fusobacterium_mortiferum_ATCC_9817	GL987988	GL987988 Fusobacterium mortiferum ATCC 9817 genomic scaffold supercont2.2, whole genome shotgun sequence. [Fusobacterium mortiferum ATCC 9817]	1099302	751621	773495	protease	Fusobacterium_phage(100.0%)	27	NA	NA
Bacteroides_uniformis_ATCC_8492	DS362244	DS362244 Bacteroides uniformis ATCC 8492 Scfld_3.0.1_27 genomic scaffold, whole genome shotgun sequence. [Bacteroides uniformis ATCC 8492]	287799	275793	286077		Bodo_saltans_virus(16.67%)	7	NA	NA
Enterococcus_faecalis_TX2137	GL454079	GL454079 Enterococcus faecalis TX2137 genomic scaffold Scfld71, whole genome shotgun sequence. [Enterococcus faecalis TX2137]	350561	303899	324317	tRNA	Enterococcus_phage(37.5%)	24	NA	NA
Enterococcus_faecalis_TX2137	GL454114	GL454114 Enterococcus faecalis TX2137 genomic scaffold Scfld185, whole genome shotgun sequence. [Enterococcus faecalis TX2137]	11359	2971	11158	transposase	Streptococcus_phage(66.67%)	8	NA	NA
Enterococcus_faecalis_TX2137	GL454153	GL454153 Enterococcus faecalis TX2137 genomic scaffold Scfld555, whole genome shotgun sequence. [Enterococcus faecalis TX2137]	430974	15356	26270		Streptococcus_phage(50.0%)	12	NA	NA
Enterococcus_faecalis_TX2137	GL454139	GL454139 Enterococcus faecalis TX2137 genomic scaffold Scfld318, whole genome shotgun sequence. [Enterococcus faecalis TX2137]	245856	82841	116844		Enterococcus_phage(40.0%)	45	NA	NA
Enterococcus_faecalis_TX2137	GL454052	GL454052 Enterococcus faecalis TX2137 genomic scaffold Scfld8, whole genome shotgun sequence. [Enterococcus faecalis TX2137]	212477	115115	123759		Synechococcus_phage(50.0%)	9	NA	NA
Enterococcus_faecalis_TX2137	GL454080	GL454080 Enterococcus faecalis TX2137 genomic scaffold Scfld72, whole genome shotgun sequence. [Enterococcus faecalis TX2137]	242350	77547	85468	transposase	Planktothrix_phage(33.33%)	11	NA	NA
Enterococcus_faecalis_TX2137	GL454080	GL454080 Enterococcus faecalis TX2137 genomic scaffold Scfld72, whole genome shotgun sequence. [Enterococcus faecalis TX2137]	242350	135928	153455		Streptococcus_phage(100.0%)	16	NA	NA
Anaerobaculum_hydrogeniformans_ATCC_BAA-1850	GG705294	GG705294 Anaerobaculum hydrogeniformans ATCC BAA-1850 genomic scaffold Scfld0, whole genome shotgun sequence. [Anaerobaculum hydrogeniformans ATCC BAA-1850]	1674363	391181	402003		Prochlorococcus_phage(28.57%)	9	NA	NA
Anaerobaculum_hydrogeniformans_ATCC_BAA-1850	GG705294	GG705294 Anaerobaculum hydrogeniformans ATCC BAA-1850 genomic scaffold Scfld0, whole genome shotgun sequence. [Anaerobaculum hydrogeniformans ATCC BAA-1850]	1674363	410554	472164	holin,transposase	Lactobacillus_prophage(25.0%)	55	NA	NA
Anaerobaculum_hydrogeniformans_ATCC_BAA-1850	GG705294	GG705294 Anaerobaculum hydrogeniformans ATCC BAA-1850 genomic scaffold Scfld0, whole genome shotgun sequence. [Anaerobaculum hydrogeniformans ATCC BAA-1850]	1674363	919677	927491	tRNA	Staphylococcus_phage(50.0%)	7	NA	NA
Anaerobaculum_hydrogeniformans_ATCC_BAA-1850	GG705295	GG705295 Anaerobaculum hydrogeniformans ATCC BAA-1850 genomic scaffold Scfld1, whole genome shotgun sequence. [Anaerobaculum hydrogeniformans ATCC BAA-1850]	432587	140382	149363		Bacillus_phage(14.29%)	11	NA	NA
Streptococcus_infantarius_subsp._infantarius_ATCC_BAA-102	DS572687	DS572687 Streptococcus infantarius subsp. infantarius ATCC BAA-102 Scfld_02_13 genomic scaffold, whole genome shotgun sequence. [Streptococcus infantarius subsp. infantarius ATCC BAA-102]	88083	67613	75810	protease	Staphylococcus_phage(33.33%)	9	NA	NA
Streptococcus_infantarius_subsp._infantarius_ATCC_BAA-102	DS572693	DS572693 Streptococcus infantarius subsp. infantarius ATCC BAA-102 Scfld_02_19 genomic scaffold, whole genome shotgun sequence. [Streptococcus infantarius subsp. infantarius ATCC BAA-102]	233422	16644	26828		Staphylococcus_phage(44.44%)	11	NA	NA
Streptococcus_infantarius_subsp._infantarius_ATCC_BAA-102	DS572693	DS572693 Streptococcus infantarius subsp. infantarius ATCC BAA-102 Scfld_02_19 genomic scaffold, whole genome shotgun sequence. [Streptococcus infantarius subsp. infantarius ATCC BAA-102]	233422	104925	142337		Streptococcus_phage(75.0%)	56	NA	NA
Streptococcus_infantarius_subsp._infantarius_ATCC_BAA-102	DS572684	DS572684 Streptococcus infantarius subsp. infantarius ATCC BAA-102 Scfld_02_10 genomic scaffold, whole genome shotgun sequence. [Streptococcus infantarius subsp. infantarius ATCC BAA-102]	82855	35359	53904		Bacillus_phage(41.67%)	17	NA	NA
Streptococcus_infantarius_subsp._infantarius_ATCC_BAA-102	DS572682	DS572682 Streptococcus infantarius subsp. infantarius ATCC BAA-102 Scfld_02_8 genomic scaffold, whole genome shotgun sequence. [Streptococcus infantarius subsp. infantarius ATCC BAA-102]	102100	37477	44774		Streptococcus_phage(66.67%)	10	NA	NA
Streptococcus_infantarius_subsp._infantarius_ATCC_BAA-102	DS572682	DS572682 Streptococcus infantarius subsp. infantarius ATCC BAA-102 Scfld_02_8 genomic scaffold, whole genome shotgun sequence. [Streptococcus infantarius subsp. infantarius ATCC BAA-102]	102100	64900	74211		Bacillus_virus(50.0%)	9	NA	NA
Streptococcus_infantarius_subsp._infantarius_ATCC_BAA-102	DS572691	DS572691 Streptococcus infantarius subsp. infantarius ATCC BAA-102 Scfld_02_17 genomic scaffold, whole genome shotgun sequence. [Streptococcus infantarius subsp. infantarius ATCC BAA-102]	144901	116849	127187	tRNA	Bacillus_phage(28.57%)	13	NA	NA
Streptococcus_infantarius_subsp._infantarius_ATCC_BAA-102	DS572694	DS572694 Streptococcus infantarius subsp. infantarius ATCC BAA-102 Scfld_02_20 genomic scaffold, whole genome shotgun sequence. [Streptococcus infantarius subsp. infantarius ATCC BAA-102]	424586	299673	317120	tRNA	Streptococcus_phage(76.92%)	20	NA	NA
Streptococcus_infantarius_subsp._infantarius_ATCC_BAA-102	DS572692	DS572692 Streptococcus infantarius subsp. infantarius ATCC BAA-102 Scfld_02_18 genomic scaffold, whole genome shotgun sequence. [Streptococcus infantarius subsp. infantarius ATCC BAA-102]	251969	46314	54825		Bacillus_phage(33.33%)	9	NA	NA
Streptococcus_infantarius_subsp._infantarius_ATCC_BAA-102	DS572692	DS572692 Streptococcus infantarius subsp. infantarius ATCC BAA-102 Scfld_02_18 genomic scaffold, whole genome shotgun sequence. [Streptococcus infantarius subsp. infantarius ATCC BAA-102]	251969	94536	104493		Streptococcus_phage(57.14%)	8	NA	NA
Streptococcus_infantarius_subsp._infantarius_ATCC_BAA-102	DS572692	DS572692 Streptococcus infantarius subsp. infantarius ATCC BAA-102 Scfld_02_18 genomic scaffold, whole genome shotgun sequence. [Streptococcus infantarius subsp. infantarius ATCC BAA-102]	251969	122857	130039		Catovirus(16.67%)	8	NA	NA
Dorea_longicatena_DSM_13814	DS264403	DS264403 Dorea longicatena DSM 13814 Scfld0219 genomic scaffold, whole genome shotgun sequence. [Dorea longicatena DSM 13814]	45355	29245	37146		Staphylococcus_phage(42.86%)	9	NA	NA
Dorea_longicatena_DSM_13814	DS264392	DS264392 Dorea longicatena DSM 13814 Scfld028 genomic scaffold, whole genome shotgun sequence. [Dorea longicatena DSM 13814]	539999	334817	340861		Faecalibacterium_phage(50.0%)	8	NA	NA
Dorea_longicatena_DSM_13814	DS264392	DS264392 Dorea longicatena DSM 13814 Scfld028 genomic scaffold, whole genome shotgun sequence. [Dorea longicatena DSM 13814]	539999	350154	358926		Faecalibacterium_phage(14.29%)	12	NA	NA
Dorea_longicatena_DSM_13814	DS264392	DS264392 Dorea longicatena DSM 13814 Scfld028 genomic scaffold, whole genome shotgun sequence. [Dorea longicatena DSM 13814]	539999	361955	372217		Paenibacillus_phage(62.5%)	13	NA	NA
Dorea_longicatena_DSM_13814	DS264393	DS264393 Dorea longicatena DSM 13814 Scfld029 genomic scaffold, whole genome shotgun sequence. [Dorea longicatena DSM 13814]	216476	56747	70069	tRNA	Tupanvirus(12.5%)	11	NA	NA
Bacteroides_dorei_5_1_36_D4	JH114322	JH114322 Bacteroides dorei 5_1_36/D4 genomic scaffold supercont2.3, whole genome shotgun sequence. [Bacteroides dorei 5_1_36/D4]	2200539	241406	249445		Streptococcus_phage(100.0%)	11	NA	NA
Bacteroides_dorei_5_1_36_D4	JH114321	JH114321 Bacteroides dorei 5_1_36/D4 genomic scaffold supercont2.2, whole genome shotgun sequence. [Bacteroides dorei 5_1_36/D4]	442931	335466	344021		Listeria_phage(16.67%)	8	NA	NA
Lachnospiraceae_bacterium_2_1_58FAA	GL945342	GL945342 Lachnospiraceae bacterium 2_1_58FAA genomic scaffold supercont1.10, whole genome shotgun sequence. [Lachnospiraceae bacterium 2_1_58FAA]	124818	16669	35765		Clostridium_botulinum_C_phage(46.15%)	23	NA	NA
Lachnospiraceae_bacterium_2_1_58FAA	GL945342	GL945342 Lachnospiraceae bacterium 2_1_58FAA genomic scaffold supercont1.10, whole genome shotgun sequence. [Lachnospiraceae bacterium 2_1_58FAA]	124818	40341	49773		Caulobacter_phage(37.5%)	15	NA	NA
Lachnospiraceae_bacterium_2_1_58FAA	GL945342	GL945342 Lachnospiraceae bacterium 2_1_58FAA genomic scaffold supercont1.10, whole genome shotgun sequence. [Lachnospiraceae bacterium 2_1_58FAA]	124818	61817	70624		Bacillus_phage(50.0%)	15	NA	NA
Lachnospiraceae_bacterium_2_1_58FAA	GL945334	GL945334 Lachnospiraceae bacterium 2_1_58FAA genomic scaffold supercont1.2, whole genome shotgun sequence. [Lachnospiraceae bacterium 2_1_58FAA]	405671	2457	8803	integrase	Clostridium_phage(33.33%)	9	209:221	11813:11825
Lachnospiraceae_bacterium_2_1_58FAA	GL945348	GL945348 Lachnospiraceae bacterium 2_1_58FAA genomic scaffold supercont1.16, whole genome shotgun sequence. [Lachnospiraceae bacterium 2_1_58FAA]	70156	21619	33137		uncultured_virus(25.0%)	12	NA	NA
Lachnospiraceae_bacterium_2_1_58FAA	GL945336	GL945336 Lachnospiraceae bacterium 2_1_58FAA genomic scaffold supercont1.4, whole genome shotgun sequence. [Lachnospiraceae bacterium 2_1_58FAA]	359457	171062	189192	protease	Clostridium_phage(46.15%)	19	NA	NA
Citrobacter_youngae_ATCC_29220	GG730303	GG730303 Citrobacter youngae ATCC 29220 genomic scaffold Scfld4, whole genome shotgun sequence. [Citrobacter youngae ATCC 29220]	423041	360738	382155	transposase,integrase	Enterobacteria_phage(30.0%)	19	367025:367040	377593:377608
Citrobacter_youngae_ATCC_29220	GG730299	GG730299 Citrobacter youngae ATCC 29220 genomic scaffold Scfld0, whole genome shotgun sequence. [Citrobacter youngae ATCC 29220]	2724488	483813	492240	tRNA	Enterobacteria_phage(66.67%)	10	NA	NA
Citrobacter_youngae_ATCC_29220	GG730299	GG730299 Citrobacter youngae ATCC 29220 genomic scaffold Scfld0, whole genome shotgun sequence. [Citrobacter youngae ATCC 29220]	2724488	528996	546322	protease	Salmonella_phage(28.57%)	18	NA	NA
Citrobacter_youngae_ATCC_29220	GG730299	GG730299 Citrobacter youngae ATCC 29220 genomic scaffold Scfld0, whole genome shotgun sequence. [Citrobacter youngae ATCC 29220]	2724488	1059330	1067070	tRNA	Escherichia_phage(33.33%)	9	NA	NA
Citrobacter_youngae_ATCC_29220	GG730299	GG730299 Citrobacter youngae ATCC 29220 genomic scaffold Scfld0, whole genome shotgun sequence. [Citrobacter youngae ATCC 29220]	2724488	2599771	2611721	integrase	Morganella_phage(25.0%)	13	2592872:2592887	2615356:2615371
Citrobacter_youngae_ATCC_29220	GG730300	GG730300 Citrobacter youngae ATCC 29220 genomic scaffold Scfld1, whole genome shotgun sequence. [Citrobacter youngae ATCC 29220]	814885	401554	409895		Klebsiella_phage(16.67%)	8	NA	NA
Citrobacter_youngae_ATCC_29220	GG730301	GG730301 Citrobacter youngae ATCC 29220 genomic scaffold Scfld2, whole genome shotgun sequence. [Citrobacter youngae ATCC 29220]	499154	365810	373245		Bacillus_virus(16.67%)	7	NA	NA
Coprococcus_comes_ATCC_27758	GG662008	GG662008 Coprococcus comes ATCC 27758 genomic scaffold Scfld3, whole genome shotgun sequence. [Coprococcus comes ATCC 27758]	304863	173277	186329		Streptococcus_phage(100.0%)	14	NA	NA
Coprococcus_comes_ATCC_27758	GG662007	GG662007 Coprococcus comes ATCC 27758 genomic scaffold Scfld2, whole genome shotgun sequence. [Coprococcus comes ATCC 27758]	847455	167409	175341		Streptococcus_phage(57.14%)	11	NA	NA
Coprococcus_comes_ATCC_27758	GG662007	GG662007 Coprococcus comes ATCC 27758 genomic scaffold Scfld2, whole genome shotgun sequence. [Coprococcus comes ATCC 27758]	847455	277715	291294	tRNA	Bacillus_phage(22.22%)	12	NA	NA
Coprococcus_comes_ATCC_27758	GG662007	GG662007 Coprococcus comes ATCC 27758 genomic scaffold Scfld2, whole genome shotgun sequence. [Coprococcus comes ATCC 27758]	847455	603278	625263		Streptococcus_phage(88.89%)	33	NA	NA
Coprococcus_comes_ATCC_27758	GG662014	GG662014 Coprococcus comes ATCC 27758 genomic scaffold Scfld9, whole genome shotgun sequence. [Coprococcus comes ATCC 27758]	891565	145583	152079		unidentified_phage(33.33%)	9	NA	NA
Coprococcus_comes_ATCC_27758	GG662014	GG662014 Coprococcus comes ATCC 27758 genomic scaffold Scfld9, whole genome shotgun sequence. [Coprococcus comes ATCC 27758]	891565	799675	809752		Clostridium_phage(22.22%)	17	NA	NA
Coprococcus_comes_ATCC_27758	GG662014	GG662014 Coprococcus comes ATCC 27758 genomic scaffold Scfld9, whole genome shotgun sequence. [Coprococcus comes ATCC 27758]	891565	822519	829873		unidentified_phage(16.67%)	11	NA	NA
Peptoclostridium_difficile_NAP08	GG770712	GG770712 Clostridium difficile NAP08 genomic scaffold SCAFFOLD3, whole genome shotgun sequence. [Peptoclostridium difficile NAP08]	719407	129399	132440		Clostridioides_phage(100.0%)	6	NA	NA
Peptoclostridium_difficile_NAP08	GG770712	GG770712 Clostridium difficile NAP08 genomic scaffold SCAFFOLD3, whole genome shotgun sequence. [Peptoclostridium difficile NAP08]	719407	154345	192996		Streptococcus_phage(73.33%)	43	NA	NA
Peptoclostridium_difficile_NAP08	GG770713	GG770713 Clostridium difficile NAP08 genomic scaffold SCAFFOLD4, whole genome shotgun sequence. [Peptoclostridium difficile NAP08]	744486	319405	342922		Clostridium_phage(52.38%)	27	NA	NA
Peptoclostridium_difficile_NAP08	GG770713	GG770713 Clostridium difficile NAP08 genomic scaffold SCAFFOLD4, whole genome shotgun sequence. [Peptoclostridium difficile NAP08]	744486	421627	433318	tRNA	Pandoravirus(25.0%)	13	NA	NA
Peptoclostridium_difficile_NAP08	GG770713	GG770713 Clostridium difficile NAP08 genomic scaffold SCAFFOLD4, whole genome shotgun sequence. [Peptoclostridium difficile NAP08]	744486	635418	644694		Bacillus_thuringiensis_phage(14.29%)	7	NA	NA
Peptoclostridium_difficile_NAP08	GG770715	GG770715 Clostridium difficile NAP08 genomic scaffold SCAFFOLD6, whole genome shotgun sequence. [Peptoclostridium difficile NAP08]	193473	114538	130721		Synechococcus_phage(23.08%)	14	NA	NA
Peptoclostridium_difficile_NAP08	GG770710	GG770710 Clostridium difficile NAP08 genomic scaffold SCAFFOLD1, whole genome shotgun sequence. [Peptoclostridium difficile NAP08]	1223138	110814	118883		Clostridioides_phage(83.33%)	6	NA	NA
Peptoclostridium_difficile_NAP08	GG770710	GG770710 Clostridium difficile NAP08 genomic scaffold SCAFFOLD1, whole genome shotgun sequence. [Peptoclostridium difficile NAP08]	1223138	819277	824014		Clostridium_phage(100.0%)	10	NA	NA
Peptoclostridium_difficile_NAP08	GG770710	GG770710 Clostridium difficile NAP08 genomic scaffold SCAFFOLD1, whole genome shotgun sequence. [Peptoclostridium difficile NAP08]	1223138	1086022	1110102		Streptococcus_phage(81.82%)	33	NA	NA
Peptoclostridium_difficile_NAP08	GG770725	GG770725 Clostridium difficile NAP08 genomic scaffold SCAFFOLD16, whole genome shotgun sequence. [Peptoclostridium difficile NAP08]	18034	336	17860		Streptococcus_phage(100.0%)	17	NA	NA
Bacteroides_sp._D2	JH636018	JH636018 Bacteroides sp. D2 genomic scaffold supercont2.3, whole genome shotgun sequence. [Bacteroides sp. D2]	534202	91415	100424		Clostridium_phage(28.57%)	19	NA	NA
Bacteroides_sp._D2	JH636018	JH636018 Bacteroides sp. D2 genomic scaffold supercont2.3, whole genome shotgun sequence. [Bacteroides sp. D2]	534202	117121	131478		unidentified_phage(87.5%)	15	NA	NA
Bacteroides_sp._D2	JH636018	JH636018 Bacteroides sp. D2 genomic scaffold supercont2.3, whole genome shotgun sequence. [Bacteroides sp. D2]	534202	135951	149346		unidentified_phage(85.71%)	12	NA	NA
Bacteroides_sp._D2	JH636019	JH636019 Bacteroides sp. D2 genomic scaffold supercont2.4, whole genome shotgun sequence. [Bacteroides sp. D2]	122616	56577	68187		uncultured_phage(30.0%)	13	NA	NA
Bacteroides_sp._D2	JH636022	JH636022 Bacteroides sp. D2 genomic scaffold supercont2.7, whole genome shotgun sequence. [Bacteroides sp. D2]	885347	365803	394610		Clostridium_phage(14.29%)	38	NA	NA
Peptoclostridium_difficile_70-100-2010	JH379297	JH379297 Clostridium difficile 70-100-2010 genomic scaffold Scfld191, whole genome shotgun sequence. [Peptoclostridium difficile 70-100-2010]	457754	318513	342180		Clostridium_phage(52.38%)	26	NA	NA
Peptoclostridium_difficile_70-100-2010	JH379297	JH379297 Clostridium difficile 70-100-2010 genomic scaffold Scfld191, whole genome shotgun sequence. [Peptoclostridium difficile 70-100-2010]	457754	424572	436264	tRNA	Pandoravirus(25.0%)	13	NA	NA
Peptoclostridium_difficile_70-100-2010	JH379329	JH379329 Clostridium difficile 70-100-2010 genomic scaffold Scfld1012, whole genome shotgun sequence. [Peptoclostridium difficile 70-100-2010]	545602	400600	406409		Clostridioides_phage(83.33%)	7	NA	NA
Peptoclostridium_difficile_70-100-2010	JH379326	JH379326 Clostridium difficile 70-100-2010 genomic scaffold Scfld900, whole genome shotgun sequence. [Peptoclostridium difficile 70-100-2010]	297692	92765	102241		Bacillus_phage(50.0%)	9	NA	NA
Peptoclostridium_difficile_70-100-2010	JH379239	JH379239 Clostridium difficile 70-100-2010 genomic scaffold Scfld19, whole genome shotgun sequence. [Peptoclostridium difficile 70-100-2010]	90644	14061	28468		Streptococcus_phage(58.33%)	18	NA	NA
Peptoclostridium_difficile_70-100-2010	JH379255	JH379255 Clostridium difficile 70-100-2010 genomic scaffold Scfld35, whole genome shotgun sequence. [Peptoclostridium difficile 70-100-2010]	100661	84222	100399		Synechococcus_phage(23.08%)	14	NA	NA
Alistipes_indistinctus_YIT_12060	JH370372	JH370372 Alistipes indistinctus YIT 12060 genomic scaffold supercont1.2, whole genome shotgun sequence. [Alistipes indistinctus YIT 12060]	1180242	969566	979429	protease,tRNA	uncultured_Mediterranean_phage(33.33%)	8	NA	NA
Clostridium_sp._HGF2	AENW01000001	AENW01000001 Clostridium sp. HGF2 contig00036, whole genome shotgun sequence. [Clostridium sp. HGF2]	40966	1818	38028		Clostridium_phage(30.43%)	57	NA	NA
Clostridium_sp._HGF2	AENW01000012	AENW01000012 Clostridium sp. HGF2 contig00051, whole genome shotgun sequence. [Clostridium sp. HGF2]	117601	103107	110863		Staphylococcus_phage(66.67%)	6	NA	NA
Clostridium_sp._HGF2	AENW01000037	AENW01000037 Clostridium sp. HGF2 contig00063, whole genome shotgun sequence. [Clostridium sp. HGF2]	75255	52943	62042	holin	Clostridium_phage(16.67%)	9	NA	NA
Clostridium_sp._HGF2	AENW01000007	AENW01000007 Clostridium sp. HGF2 contig00002, whole genome shotgun sequence. [Clostridium sp. HGF2]	188180	64991	103957	protease	Erysipelothrix_phage(52.94%)	48	NA	NA
Clostridium_sp._HGF2	AENW01000033	AENW01000033 Clostridium sp. HGF2 contig00013, whole genome shotgun sequence. [Clostridium sp. HGF2]	34967	4084	22530		Streptococcus_phage(93.75%)	22	NA	NA
Paenibacillus_sp._HGF7	AFDH01000102	AFDH01000102 Paenibacillus sp. HGF7 contig00070, whole genome shotgun sequence. [Paenibacillus sp. HGF7]	52949	2948	11957		Mollivirus(33.33%)	8	NA	NA
Paenibacillus_sp._HGF7	AFDH01000075	AFDH01000075 Paenibacillus sp. HGF7 contig00173, whole genome shotgun sequence. [Paenibacillus sp. HGF7]	59308	25181	35062		Staphylococcus_phage(50.0%)	11	NA	NA
Paenibacillus_sp._HGF7	AFDH01000017	AFDH01000017 Paenibacillus sp. HGF7 contig00150, whole genome shotgun sequence. [Paenibacillus sp. HGF7]	28838	5337	13973		Bacillus_phage(37.5%)	19	NA	NA
Paenibacillus_sp._HGF7	AFDH01000116	AFDH01000116 Paenibacillus sp. HGF7 contig00129, whole genome shotgun sequence. [Paenibacillus sp. HGF7]	192779	105491	115499	tRNA	Bacillus_phage(33.33%)	7	NA	NA
Paenibacillus_sp._HGF7	AFDH01000035	AFDH01000035 Paenibacillus sp. HGF7 contig00131, whole genome shotgun sequence. [Paenibacillus sp. HGF7]	13245	2229	13171		Bacillus_phage(25.0%)	11	NA	NA
Paenibacillus_sp._HGF7	AFDH01000001	AFDH01000001 Paenibacillus sp. HGF7 contig00199, whole genome shotgun sequence. [Paenibacillus sp. HGF7]	63950	12122	20984		uncultured_Mediterranean_phage(16.67%)	9	NA	NA
Paenibacillus_sp._HGF7	AFDH01000025	AFDH01000025 Paenibacillus sp. HGF7 contig00140, whole genome shotgun sequence. [Paenibacillus sp. HGF7]	279279	725	9085		Lake_Baikal_phage(33.33%)	7	NA	NA
Paenibacillus_sp._HGF7	AFDH01000025	AFDH01000025 Paenibacillus sp. HGF7 contig00140, whole genome shotgun sequence. [Paenibacillus sp. HGF7]	279279	176506	186697		uncultured_Caudovirales_phage(25.0%)	11	NA	NA
Paenibacillus_sp._HGF7	AFDH01000056	AFDH01000056 Paenibacillus sp. HGF7 contig00137, whole genome shotgun sequence. [Paenibacillus sp. HGF7]	396893	376048	391476	protease	Bacillus_phage(53.85%)	21	NA	NA
Paenibacillus_sp._HGF7	AFDH01000009	AFDH01000009 Paenibacillus sp. HGF7 contig00019, whole genome shotgun sequence. [Paenibacillus sp. HGF7]	89747	39832	62694		Geobacillus_virus(38.46%)	24	NA	NA
Alistipes_shahii_WAL_8301	FP929032	FP929032 Alistipes shahii WAL 8301 draft genome. [Alistipes shahii WAL 8301]	3763317	201997	208751		Cellulophaga_phage(33.33%)	10	NA	NA
Enterococcus_sp._7L76	FP929058	FP929058 Enterococcus sp. 7L76 draft genome. [Enterococcus sp. 7L76]	3096657	411016	448317	protease	Enterococcus_phage(38.24%)	52	NA	NA
Enterococcus_sp._7L76	FP929058	FP929058 Enterococcus sp. 7L76 draft genome. [Enterococcus sp. 7L76]	3096657	676439	693384		Enterococcus_phage(40.0%)	23	NA	NA
Enterococcus_sp._7L76	FP929058	FP929058 Enterococcus sp. 7L76 draft genome. [Enterococcus sp. 7L76]	3096657	1150307	1158952		Synechococcus_phage(50.0%)	9	NA	NA
Enterococcus_sp._7L76	FP929058	FP929058 Enterococcus sp. 7L76 draft genome. [Enterococcus sp. 7L76]	3096657	1299480	1307039		Enterococcus_phage(42.86%)	11	NA	NA
Enterococcus_sp._7L76	FP929058	FP929058 Enterococcus sp. 7L76 draft genome. [Enterococcus sp. 7L76]	3096657	1325085	1336895		Enterococcus_phage(80.0%)	21	NA	NA
Enterococcus_sp._7L76	FP929058	FP929058 Enterococcus sp. 7L76 draft genome. [Enterococcus sp. 7L76]	3096657	1898832	1908586		Streptococcus_phage(57.14%)	11	NA	NA
Enterococcus_sp._7L76	FP929058	FP929058 Enterococcus sp. 7L76 draft genome. [Enterococcus sp. 7L76]	3096657	1975512	1982289		Enterococcus_phage(33.33%)	11	NA	NA
Enterococcus_sp._7L76	FP929058	FP929058 Enterococcus sp. 7L76 draft genome. [Enterococcus sp. 7L76]	3096657	1992302	2010671		Enterococcus_phage(54.17%)	29	NA	NA
Enterococcus_sp._7L76	FP929058	FP929058 Enterococcus sp. 7L76 draft genome. [Enterococcus sp. 7L76]	3096657	2112415	2120292	transposase	uncultured_Caudovirales_phage(16.67%)	11	NA	NA
Enterococcus_sp._7L76	FP929058	FP929058 Enterococcus sp. 7L76 draft genome. [Enterococcus sp. 7L76]	3096657	2413677	2473016	tRNA,protease,holin,transposase	Organic_Lake_phycodnavirus(11.11%)	58	NA	NA
Ruminococcus_lactaris_ATCC_29176	DS990191	DS990191 Ruminococcus lactaris ATCC 29176 Scfld_02_28 genomic scaffold, whole genome shotgun sequence. [Ruminococcus lactaris ATCC 29176]	196990	29860	77331	protease,transposase	Wolbachia_phage(30.77%)	44	NA	NA
Ruminococcus_lactaris_ATCC_29176	DS990192	DS990192 Ruminococcus lactaris ATCC 29176 Scfld_02_29 genomic scaffold, whole genome shotgun sequence. [Ruminococcus lactaris ATCC 29176]	131638	77802	96994	transposase	Streptococcus_phage(69.23%)	21	NA	NA
Ruminococcus_lactaris_ATCC_29176	DS990201	DS990201 Ruminococcus lactaris ATCC 29176 Scfld_02_38 genomic scaffold, whole genome shotgun sequence. [Ruminococcus lactaris ATCC 29176]	192924	66400	77785	transposase	Acidithiobacillus_phage(20.0%)	14	NA	NA
Ruminococcus_lactaris_ATCC_29176	DS990201	DS990201 Ruminococcus lactaris ATCC 29176 Scfld_02_38 genomic scaffold, whole genome shotgun sequence. [Ruminococcus lactaris ATCC 29176]	192924	98801	107426		Erysipelothrix_phage(33.33%)	10	NA	NA
Ruminococcus_lactaris_ATCC_29176	DS990201	DS990201 Ruminococcus lactaris ATCC 29176 Scfld_02_38 genomic scaffold, whole genome shotgun sequence. [Ruminococcus lactaris ATCC 29176]	192924	127450	153895	protease,transposase	Streptococcus_phage(50.0%)	31	NA	NA
Ruminococcus_lactaris_ATCC_29176	DS990201	DS990201 Ruminococcus lactaris ATCC 29176 Scfld_02_38 genomic scaffold, whole genome shotgun sequence. [Ruminococcus lactaris ATCC 29176]	192924	159240	167703		Streptococcus_phage(40.0%)	8	NA	NA
Bacteroides_eggerthii_1_2_48FAA	GL622538	GL622538 Bacteroides eggerthii 1_2_48FAA genomic scaffold supercont1.1, whole genome shotgun sequence. [Bacteroides eggerthii 1_2_48FAA]	727100	398346	403321		Streptococcus_phage(100.0%)	9	NA	NA
Bacteroides_eggerthii_1_2_48FAA	GL622540	GL622540 Bacteroides eggerthii 1_2_48FAA genomic scaffold supercont1.3, whole genome shotgun sequence. [Bacteroides eggerthii 1_2_48FAA]	596525	205161	214705		unidentified_phage(62.5%)	10	NA	NA
Lactobacillus_antri_DSM_16041	GG700732	GG700732 Lactobacillus antri DSM 16041 genomic scaffold SCAFFOLD1, whole genome shotgun sequence. [Lactobacillus antri DSM 16041]	754183	492464	525231		Lactobacillus_phage(72.41%)	50	NA	NA
Lactobacillus_antri_DSM_16041	GG700734	GG700734 Lactobacillus antri DSM 16041 genomic scaffold SCAFFOLD3, whole genome shotgun sequence. [Lactobacillus antri DSM 16041]	171508	101644	110373		Escherichia_phage(33.33%)	6	NA	NA
Lactobacillus_antri_DSM_16041	GG700733	GG700733 Lactobacillus antri DSM 16041 genomic scaffold SCAFFOLD2, whole genome shotgun sequence. [Lactobacillus antri DSM 16041]	855886	86336	94344		Bacillus_phage(33.33%)	9	NA	NA
Lactobacillus_antri_DSM_16041	GG700733	GG700733 Lactobacillus antri DSM 16041 genomic scaffold SCAFFOLD2, whole genome shotgun sequence. [Lactobacillus antri DSM 16041]	855886	645820	668211	protease	Erysipelothrix_phage(71.43%)	25	NA	NA
Lactobacillus_antri_DSM_16041	GG700733	GG700733 Lactobacillus antri DSM 16041 genomic scaffold SCAFFOLD2, whole genome shotgun sequence. [Lactobacillus antri DSM 16041]	855886	756640	765259	tRNA	Enterococcus_phage(33.33%)	10	NA	NA
Bifidobacterium_dentium_ATCC_27678	ABIX02000002	ABIX02000002 Bifidobacterium dentium ATCC 27678 B_dentium-2.0.1_Cont348, whole genome shotgun sequence. [Bifidobacterium dentium ATCC 27678]	2635766	1794166	1802786	transposase	Bacillus_phage(33.33%)	9	NA	NA
Collinsella_intestinalis_DSM_13280	GG692710	GG692710 Collinsella intestinalis DSM 13280 genomic scaffold Scfld_02_0, whole genome shotgun sequence. [Collinsella intestinalis DSM 13280]	1465924	127782	135120		Planktothrix_phage(33.33%)	8	NA	NA
Collinsella_intestinalis_DSM_13280	GG692710	GG692710 Collinsella intestinalis DSM 13280 genomic scaffold Scfld_02_0, whole genome shotgun sequence. [Collinsella intestinalis DSM 13280]	1465924	340858	358081		Propionibacterium_phage(28.57%)	30	NA	NA
Collinsella_intestinalis_DSM_13280	GG692711	GG692711 Collinsella intestinalis DSM 13280 genomic scaffold Scfld_02_1, whole genome shotgun sequence. [Collinsella intestinalis DSM 13280]	338910	23769	31170		Bacillus_phage(71.43%)	7	NA	NA
Alistipes_putredinis_DSM_17216	DS499577	DS499577 Alistipes putredinis DSM 17216 Scfld_02_7 genomic scaffold, whole genome shotgun sequence. [Alistipes putredinis DSM 17216]	1197641	212716	220678		Enterobacteria_phage(42.86%)	7	NA	NA
Alistipes_putredinis_DSM_17216	DS499577	DS499577 Alistipes putredinis DSM 17216 Scfld_02_7 genomic scaffold, whole genome shotgun sequence. [Alistipes putredinis DSM 17216]	1197641	1065951	1091786		Cellulophaga_phage(14.29%)	45	NA	NA
Alistipes_putredinis_DSM_17216	DS499580	DS499580 Alistipes putredinis DSM 17216 Scfld_02_10 genomic scaffold, whole genome shotgun sequence. [Alistipes putredinis DSM 17216]	479642	292379	304828		Synechococcus_phage(37.5%)	9	NA	NA
Lactobacillus_ruminis_ATCC_25644	GL833109	GL833109 Lactobacillus ruminis ATCC 25644 genomic scaffold SCAFFOLD1, whole genome shotgun sequence. [Lactobacillus ruminis ATCC 25644]	1099846	287845	296374	transposase	Staphylococcus_phage(16.67%)	11	NA	NA
Lactobacillus_ruminis_ATCC_25644	GL833109	GL833109 Lactobacillus ruminis ATCC 25644 genomic scaffold SCAFFOLD1, whole genome shotgun sequence. [Lactobacillus ruminis ATCC 25644]	1099846	521675	559668		Lactobacillus_phage(34.48%)	41	NA	NA
Lactobacillus_ruminis_ATCC_25644	GL833109	GL833109 Lactobacillus ruminis ATCC 25644 genomic scaffold SCAFFOLD1, whole genome shotgun sequence. [Lactobacillus ruminis ATCC 25644]	1099846	676549	687342		Prochlorococcus_phage(33.33%)	7	NA	NA
Lactobacillus_ruminis_ATCC_25644	GL833109	GL833109 Lactobacillus ruminis ATCC 25644 genomic scaffold SCAFFOLD1, whole genome shotgun sequence. [Lactobacillus ruminis ATCC 25644]	1099846	1001028	1009537		Paramecium_bursaria_Chlorella_virus(14.29%)	8	NA	NA
Lactobacillus_ruminis_ATCC_25644	GL833109	GL833109 Lactobacillus ruminis ATCC 25644 genomic scaffold SCAFFOLD1, whole genome shotgun sequence. [Lactobacillus ruminis ATCC 25644]	1099846	1054600	1062896		Bacillus_phage(42.86%)	10	NA	NA
Lactobacillus_ruminis_ATCC_25644	GL833111	GL833111 Lactobacillus ruminis ATCC 25644 genomic scaffold SCAFFOLD3, whole genome shotgun sequence. [Lactobacillus ruminis ATCC 25644]	251051	55230	64012	transposase	Streptococcus_phage(25.0%)	10	NA	NA
Lactobacillus_ruminis_ATCC_25644	GL833115	GL833115 Lactobacillus ruminis ATCC 25644 genomic scaffold SCAFFOLD7, whole genome shotgun sequence. [Lactobacillus ruminis ATCC 25644]	103264	10624	42382		Streptococcus_phage(44.12%)	48	NA	NA
Escherichia_sp._3_2_53FAA	DS999463	DS999463 Escherichia sp. 3_2_53FAA genomic scaffold supercont1.5, whole genome shotgun sequence. [Escherichia sp. 3_2_53FAA]	783185	220633	278025	integrase,transposase,tRNA,protease	Shigella_phage(13.33%)	52	221190:221204	274040:274054
Escherichia_sp._3_2_53FAA	DS999459	DS999459 Escherichia sp. 3_2_53FAA genomic scaffold supercont1.1, whole genome shotgun sequence. [Escherichia sp. 3_2_53FAA]	949755	10561	15228		Enterobacteria_phage(62.5%)	9	NA	NA
Escherichia_sp._3_2_53FAA	DS999459	DS999459 Escherichia sp. 3_2_53FAA genomic scaffold supercont1.1, whole genome shotgun sequence. [Escherichia sp. 3_2_53FAA]	949755	20889	41417		Enterobacteria_phage(53.12%)	35	NA	NA
Escherichia_sp._3_2_53FAA	DS999459	DS999459 Escherichia sp. 3_2_53FAA genomic scaffold supercont1.1, whole genome shotgun sequence. [Escherichia sp. 3_2_53FAA]	949755	304558	313366		uncultured_Caudovirales_phage(33.33%)	10	NA	NA
Escherichia_sp._3_2_53FAA	DS999459	DS999459 Escherichia sp. 3_2_53FAA genomic scaffold supercont1.1, whole genome shotgun sequence. [Escherichia sp. 3_2_53FAA]	949755	941741	949593		Bradyrhizobium_phage(16.67%)	9	NA	NA
Escherichia_sp._3_2_53FAA	DS999461	DS999461 Escherichia sp. 3_2_53FAA genomic scaffold supercont1.3, whole genome shotgun sequence. [Escherichia sp. 3_2_53FAA]	814656	107120	126562		Escherichia_phage(23.53%)	26	NA	NA
Escherichia_sp._3_2_53FAA	DS999461	DS999461 Escherichia sp. 3_2_53FAA genomic scaffold supercont1.3, whole genome shotgun sequence. [Escherichia sp. 3_2_53FAA]	814656	131660	136338		Escherichia_phage(50.0%)	9	NA	NA
Escherichia_sp._3_2_53FAA	DS999461	DS999461 Escherichia sp. 3_2_53FAA genomic scaffold supercont1.3, whole genome shotgun sequence. [Escherichia sp. 3_2_53FAA]	814656	143954	150918	tail	Enterobacteria_phage(57.14%)	9	NA	NA
Escherichia_sp._3_2_53FAA	DS999461	DS999461 Escherichia sp. 3_2_53FAA genomic scaffold supercont1.3, whole genome shotgun sequence. [Escherichia sp. 3_2_53FAA]	814656	525963	536781		Hokovirus(14.29%)	11	NA	NA
Escherichia_sp._3_2_53FAA	DS999460	DS999460 Escherichia sp. 3_2_53FAA genomic scaffold supercont1.2, whole genome shotgun sequence. [Escherichia sp. 3_2_53FAA]	819049	670683	677823		Escherichia_phage(83.33%)	6	NA	NA
Escherichia_sp._3_2_53FAA	DS999460	DS999460 Escherichia sp. 3_2_53FAA genomic scaffold supercont1.2, whole genome shotgun sequence. [Escherichia sp. 3_2_53FAA]	819049	731988	739347		Mycobacterium_phage(33.33%)	7	NA	NA
Escherichia_sp._3_2_53FAA	DS999460	DS999460 Escherichia sp. 3_2_53FAA genomic scaffold supercont1.2, whole genome shotgun sequence. [Escherichia sp. 3_2_53FAA]	819049	752669	788925	tail	Shigella_phage(51.02%)	55	NA	NA
Escherichia_sp._3_2_53FAA	DS999462	DS999462 Escherichia sp. 3_2_53FAA genomic scaffold supercont1.4, whole genome shotgun sequence. [Escherichia sp. 3_2_53FAA]	784483	27752	110839	integrase,transposase	Paenibacillus_phage(25.0%)	50	25688:25707	81972:81991
Escherichia_sp._3_2_53FAA	DS999462	DS999462 Escherichia sp. 3_2_53FAA genomic scaffold supercont1.4, whole genome shotgun sequence. [Escherichia sp. 3_2_53FAA]	784483	156970	165686		Enterobacteria_phage(42.86%)	8	NA	NA
Escherichia_sp._3_2_53FAA	DS999462	DS999462 Escherichia sp. 3_2_53FAA genomic scaffold supercont1.4, whole genome shotgun sequence. [Escherichia sp. 3_2_53FAA]	784483	261439	270884		Enterobacteria_phage(75.0%)	10	NA	NA
Escherichia_sp._3_2_53FAA	DS999462	DS999462 Escherichia sp. 3_2_53FAA genomic scaffold supercont1.4, whole genome shotgun sequence. [Escherichia sp. 3_2_53FAA]	784483	508686	551011	integrase,protease	Enterobacteria_phage(73.77%)	63	509755:509771	551085:551101
Escherichia_sp._3_2_53FAA	DS999462	DS999462 Escherichia sp. 3_2_53FAA genomic scaffold supercont1.4, whole genome shotgun sequence. [Escherichia sp. 3_2_53FAA]	784483	679098	685588		Escherichia_phage(57.14%)	7	NA	NA
Escherichia_sp._3_2_53FAA	DS999462	DS999462 Escherichia sp. 3_2_53FAA genomic scaffold supercont1.4, whole genome shotgun sequence. [Escherichia sp. 3_2_53FAA]	784483	716411	726280	tRNA	Mycoplasma_phage(14.29%)	12	NA	NA
Escherichia_sp._3_2_53FAA	DS999464	DS999464 Escherichia sp. 3_2_53FAA genomic scaffold supercont1.6, whole genome shotgun sequence. [Escherichia sp. 3_2_53FAA]	529371	385200	393933	integrase	Morganella_phage(66.67%)	14	385080:385092	387548:387560
Bifidobacterium_breve_DSM_20213_=_JCM_1192	GG729831	GG729831 Bifidobacterium breve DSM 20213 genomic scaffold Scfld1, whole genome shotgun sequence. [Bifidobacterium breve DSM 20213 = JCM 1192]	883138	208480	216982		Bacillus_phage(33.33%)	7	NA	NA
Bifidobacterium_breve_DSM_20213_=_JCM_1192	GG729831	GG729831 Bifidobacterium breve DSM 20213 genomic scaffold Scfld1, whole genome shotgun sequence. [Bifidobacterium breve DSM 20213 = JCM 1192]	883138	671214	678161		Bifidobacterium_phage(25.0%)	12	NA	NA
Bifidobacterium_breve_DSM_20213_=_JCM_1192	GG729831	GG729831 Bifidobacterium breve DSM 20213 genomic scaffold Scfld1, whole genome shotgun sequence. [Bifidobacterium breve DSM 20213 = JCM 1192]	883138	682019	701460		Propionibacterium_phage(28.57%)	20	NA	NA
Bifidobacterium_breve_DSM_20213_=_JCM_1192	GG729830	GG729830 Bifidobacterium breve DSM 20213 genomic scaffold Scfld0, whole genome shotgun sequence. [Bifidobacterium breve DSM 20213 = JCM 1192]	1384428	187428	199796	tRNA	uncultured_Mediterranean_phage(33.33%)	7	NA	NA
Ralstonia_sp._5_7_47FAA	GL520220	GL520220 Ralstonia sp. 5_7_47FAA genomic scaffold supercont1.4, whole genome shotgun sequence. [Ralstonia sp. 5_7_47FAA]	683201	205895	215038	protease	Phage_21(16.67%)	9	NA	NA
Ralstonia_sp._5_7_47FAA	GL520226	GL520226 Ralstonia sp. 5_7_47FAA genomic scaffold supercont1.10, whole genome shotgun sequence. [Ralstonia sp. 5_7_47FAA]	139189	116583	124249		Wolbachia_phage(16.67%)	12	NA	NA
Ralstonia_sp._5_7_47FAA	GL520219	GL520219 Ralstonia sp. 5_7_47FAA genomic scaffold supercont1.3, whole genome shotgun sequence. [Ralstonia sp. 5_7_47FAA]	689374	373024	410993	transposase	Acidithiobacillus_phage(36.36%)	44	NA	NA
Ralstonia_sp._5_7_47FAA	GL520219	GL520219 Ralstonia sp. 5_7_47FAA genomic scaffold supercont1.3, whole genome shotgun sequence. [Ralstonia sp. 5_7_47FAA]	689374	414825	419578		Acidithiobacillus_phage(83.33%)	7	NA	NA
Ralstonia_sp._5_7_47FAA	GL520219	GL520219 Ralstonia sp. 5_7_47FAA genomic scaffold supercont1.3, whole genome shotgun sequence. [Ralstonia sp. 5_7_47FAA]	689374	445311	453587		Bacillus_phage(16.67%)	8	NA	NA
Klebsiella_sp._1_1_55	GG745509	GG745509 Klebsiella sp. 1_1_55 genomic scaffold supercont1.2, whole genome shotgun sequence. [Klebsiella sp. 1_1_55]	1084691	771361	780808	protease,tRNA	Dickeya_phage(16.67%)	8	NA	NA
Klebsiella_sp._1_1_55	GG745509	GG745509 Klebsiella sp. 1_1_55 genomic scaffold supercont1.2, whole genome shotgun sequence. [Klebsiella sp. 1_1_55]	1084691	1037529	1081676		Salmonella_phage(27.91%)	51	NA	NA
Klebsiella_sp._1_1_55	GG745515	GG745515 Klebsiella sp. 1_1_55 genomic scaffold supercont1.8, whole genome shotgun sequence. [Klebsiella sp. 1_1_55]	126386	78904	121145	integrase	Salmonella_phage(18.0%)	64	77436:77452	122094:122110
Klebsiella_sp._1_1_55	GG745510	GG745510 Klebsiella sp. 1_1_55 genomic scaffold supercont1.3, whole genome shotgun sequence. [Klebsiella sp. 1_1_55]	778702	71791	79156		Streptococcus_phage(16.67%)	7	NA	NA
Klebsiella_sp._1_1_55	GG745508	GG745508 Klebsiella sp. 1_1_55 genomic scaffold supercont1.1, whole genome shotgun sequence. [Klebsiella sp. 1_1_55]	1875766	47038	54067		Vibrio_phage(16.67%)	9	NA	NA
Klebsiella_sp._1_1_55	GG745508	GG745508 Klebsiella sp. 1_1_55 genomic scaffold supercont1.1, whole genome shotgun sequence. [Klebsiella sp. 1_1_55]	1875766	928904	937424		Canarypox_virus(16.67%)	8	NA	NA
Klebsiella_sp._1_1_55	GG745508	GG745508 Klebsiella sp. 1_1_55 genomic scaffold supercont1.1, whole genome shotgun sequence. [Klebsiella sp. 1_1_55]	1875766	1542863	1553742		Escherichia_phage(87.5%)	9	NA	NA
Klebsiella_sp._1_1_55	GG745514	GG745514 Klebsiella sp. 1_1_55 genomic scaffold supercont1.7, whole genome shotgun sequence. [Klebsiella sp. 1_1_55]	129771	113581	125424		Salmonella_phage(37.5%)	11	NA	NA
Enterococcus_saccharolyticus_30_1	JH376940	JH376940 Enterococcus saccharolyticus 30_1 genomic scaffold supercont1.2, whole genome shotgun sequence. [Enterococcus saccharolyticus 30_1]	479017	416173	447539		Lactococcus_phage(39.29%)	40	NA	NA
Enterococcus_saccharolyticus_30_1	JH376942	JH376942 Enterococcus saccharolyticus 30_1 genomic scaffold supercont1.4, whole genome shotgun sequence. [Enterococcus saccharolyticus 30_1]	314757	160644	170174	tRNA	Planktothrix_phage(28.57%)	8	NA	NA
Enterococcus_saccharolyticus_30_1	JH376941	JH376941 Enterococcus saccharolyticus 30_1 genomic scaffold supercont1.3, whole genome shotgun sequence. [Enterococcus saccharolyticus 30_1]	473363	380319	388778		Prochlorococcus_phage(28.57%)	8	NA	NA
Enterococcus_saccharolyticus_30_1	JH376939	JH376939 Enterococcus saccharolyticus 30_1 genomic scaffold supercont1.1, whole genome shotgun sequence. [Enterococcus saccharolyticus 30_1]	1477942	1446174	1467441	transposase	Lactobacillus_phage(27.78%)	26	NA	NA
Helicobacter_pylori_HP116Bi	KB642244	KB642244 Helicobacter pylori HP116Bi genomic scaffold Scfld0, whole genome shotgun sequence. [Helicobacter pylori HP116Bi]	5420	537	5344		Escherichia_phage(100.0%)	7	NA	NA
Flavonifractor_plautii_ATCC_29863	JH417664	JH417664 Flavonifractor plautii ATCC 29863 genomic scaffold Scfld64, whole genome shotgun sequence. [Flavonifractor plautii ATCC 29863]	17964	5905	13332	protease,tRNA	Planktothrix_phage(16.67%)	8	NA	NA
Flavonifractor_plautii_ATCC_29863	JH417809	JH417809 Flavonifractor plautii ATCC 29863 genomic scaffold Scfld418, whole genome shotgun sequence. [Flavonifractor plautii ATCC 29863]	12500	2112	11881		Staphylococcus_phage(16.67%)	8	NA	NA
Flavonifractor_plautii_ATCC_29863	JH417672	JH417672 Flavonifractor plautii ATCC 29863 genomic scaffold Scfld76, whole genome shotgun sequence. [Flavonifractor plautii ATCC 29863]	14198	8122	14137		Deep-sea_thermophilic_phage(14.29%)	12	NA	NA
Flavonifractor_plautii_ATCC_29863	JH417695	JH417695 Flavonifractor plautii ATCC 29863 genomic scaffold Scfld106, whole genome shotgun sequence. [Flavonifractor plautii ATCC 29863]	10624	614	9722		Clostridium_phage(37.5%)	11	NA	NA
Flavonifractor_plautii_ATCC_29863	JH417791	JH417791 Flavonifractor plautii ATCC 29863 genomic scaffold Scfld339, whole genome shotgun sequence. [Flavonifractor plautii ATCC 29863]	32440	9537	25726	protease	Erysipelothrix_phage(18.18%)	21	NA	NA
Flavonifractor_plautii_ATCC_29863	JH417643	JH417643 Flavonifractor plautii ATCC 29863 genomic scaffold Scfld40, whole genome shotgun sequence. [Flavonifractor plautii ATCC 29863]	19607	5966	17237		unidentified_phage(37.5%)	15	NA	NA
Flavonifractor_plautii_ATCC_29863	JH417781	JH417781 Flavonifractor plautii ATCC 29863 genomic scaffold Scfld304, whole genome shotgun sequence. [Flavonifractor plautii ATCC 29863]	17163	2490	9286		Faecalibacterium_phage(28.57%)	10	NA	NA
Flavonifractor_plautii_ATCC_29863	JH417842	JH417842 Flavonifractor plautii ATCC 29863 genomic scaffold Scfld600, whole genome shotgun sequence. [Flavonifractor plautii ATCC 29863]	52394	19536	35074		Brevibacillus_phage(18.18%)	19	NA	NA
Flavonifractor_plautii_ATCC_29863	JH417842	JH417842 Flavonifractor plautii ATCC 29863 genomic scaffold Scfld600, whole genome shotgun sequence. [Flavonifractor plautii ATCC 29863]	52394	39690	50369		Streptococcus_phage(37.5%)	13	NA	NA
Flavonifractor_plautii_ATCC_29863	JH417677	JH417677 Flavonifractor plautii ATCC 29863 genomic scaffold Scfld82, whole genome shotgun sequence. [Flavonifractor plautii ATCC 29863]	36587	6169	13731		Synechococcus_phage(50.0%)	9	NA	NA
Helicobacter_pylori_HP250AFii	KB642441	KB642441 Helicobacter pylori HP250AFii genomic scaffold Scfld33, whole genome shotgun sequence. [Helicobacter pylori HP250AFii]	98919	27551	38451		uncultured_Caudovirales_phage(33.33%)	10	NA	NA
Helicobacter_pylori_HP250AFii	KB642427	KB642427 Helicobacter pylori HP250AFii genomic scaffold Scfld179, whole genome shotgun sequence. [Helicobacter pylori HP250AFii]	137927	97219	105484	tRNA	Synechococcus_phage(33.33%)	8	NA	NA
Helicobacter_pylori_HP250AFii	KB642414	KB642414 Helicobacter pylori HP250AFii genomic scaffold Scfld0, whole genome shotgun sequence. [Helicobacter pylori HP250AFii]	5416	250	4990		Escherichia_phage(100.0%)	6	NA	NA
Clostridiales_butyrate-producing_bacterium_SS3_4	FP929062	FP929062 Clostridiales sp. SS3/4 draft genome. [Clostridiales butyrate-producing bacterium SS3/4]	3601020	225942	238855		Bacillus_phage(25.0%)	23	NA	NA
Clostridiales_butyrate-producing_bacterium_SS3_4	FP929062	FP929062 Clostridiales sp. SS3/4 draft genome. [Clostridiales butyrate-producing bacterium SS3/4]	3601020	257772	268856	protease	unidentified_phage(33.33%)	13	NA	NA
Clostridiales_butyrate-producing_bacterium_SS3_4	FP929062	FP929062 Clostridiales sp. SS3/4 draft genome. [Clostridiales butyrate-producing bacterium SS3/4]	3601020	361394	380960		Streptococcus_phage(82.35%)	21	NA	NA
Clostridiales_butyrate-producing_bacterium_SS3_4	FP929062	FP929062 Clostridiales sp. SS3/4 draft genome. [Clostridiales butyrate-producing bacterium SS3/4]	3601020	573305	610955		Faecalibacterium_phage(68.75%)	51	NA	NA
Clostridiales_butyrate-producing_bacterium_SS3_4	FP929062	FP929062 Clostridiales sp. SS3/4 draft genome. [Clostridiales butyrate-producing bacterium SS3/4]	3601020	2672301	2684962		uncultured_Caudovirales_phage(50.0%)	17	NA	NA
Clostridiales_butyrate-producing_bacterium_SS3_4	FP929062	FP929062 Clostridiales sp. SS3/4 draft genome. [Clostridiales butyrate-producing bacterium SS3/4]	3601020	3053230	3060820		uncultured_Caudovirales_phage(33.33%)	9	NA	NA
Clostridiales_butyrate-producing_bacterium_SS3_4	FP929062	FP929062 Clostridiales sp. SS3/4 draft genome. [Clostridiales butyrate-producing bacterium SS3/4]	3601020	3064212	3071839		uncultured_Caudovirales_phage(28.57%)	8	NA	NA
Bacteroides_sp._3_1_19	GG774762	GG774762 Bacteroides sp. 3_1_19 genomic scaffold supercont1.4, whole genome shotgun sequence. [Bacteroides sp. 3_1_19]	631949	154130	167002		Vibrio_phage(16.67%)	18	NA	NA
Bacteroides_sp._3_1_19	GG774762	GG774762 Bacteroides sp. 3_1_19 genomic scaffold supercont1.4, whole genome shotgun sequence. [Bacteroides sp. 3_1_19]	631949	423143	430737		Sulfolobus_monocaudavirus(16.67%)	8	NA	NA
Bacteroides_sp._3_1_19	GG774760	GG774760 Bacteroides sp. 3_1_19 genomic scaffold supercont1.2, whole genome shotgun sequence. [Bacteroides sp. 3_1_19]	1043499	529148	538304		Synechococcus_phage(42.86%)	8	NA	NA
Bacteroides_sp._3_1_19	GG774761	GG774761 Bacteroides sp. 3_1_19 genomic scaffold supercont1.3, whole genome shotgun sequence. [Bacteroides sp. 3_1_19]	709607	456801	468994		Cellulophaga_phage(12.5%)	19	NA	NA
Helicobacter_pylori_GAM120Ai	KB644431	KB644431 Helicobacter pylori GAM120Ai genomic scaffold Scfld137, whole genome shotgun sequence. [Helicobacter pylori GAM120Ai]	126038	27443	38366		uncultured_Caudovirales_phage(33.33%)	9	NA	NA
Helicobacter_pylori_GAM120Ai	KB644451	KB644451 Helicobacter pylori GAM120Ai genomic scaffold Scfld29, whole genome shotgun sequence. [Helicobacter pylori GAM120Ai]	121571	73550	90792		Helicobacter_phage(91.67%)	25	NA	NA
Helicobacter_pylori_GAM120Ai	KB644450	KB644450 Helicobacter pylori GAM120Ai genomic scaffold Scfld26, whole genome shotgun sequence. [Helicobacter pylori GAM120Ai]	5420	579	5319		Escherichia_phage(100.0%)	6	NA	NA
Corynebacterium_sp._HFH0082	KE150404	KE150404 Corynebacterium sp. HFH0082 genomic scaffold acAqB-supercont-complete, whole genome shotgun sequence. [Corynebacterium sp. HFH0082]	2493224	631931	643205	transposase,tRNA	Mycobacterium_phage(37.5%)	10	NA	NA
Escherichia_coli_MS_78-1	GG773273	GG773273 Escherichia coli MS 78-1 genomic scaffold Scfld211, whole genome shotgun sequence. [Escherichia coli MS 78-1]	89898	42541	49681		Escherichia_phage(66.67%)	6	NA	NA
Escherichia_coli_MS_78-1	GG773276	GG773276 Escherichia coli MS 78-1 genomic scaffold Scfld230, whole genome shotgun sequence. [Escherichia coli MS 78-1]	46447	64	10966	transposase,tail	Enterobacteria_phage(25.0%)	10	NA	NA
Escherichia_coli_MS_78-1	GG773334	GG773334 Escherichia coli MS 78-1 genomic scaffold Scfld882, whole genome shotgun sequence. [Escherichia coli MS 78-1]	96261	60483	70600	tRNA	Brazilian_cedratvirus(14.29%)	12	NA	NA
Escherichia_coli_MS_78-1	GG773309	GG773309 Escherichia coli MS 78-1 genomic scaffold Scfld496, whole genome shotgun sequence. [Escherichia coli MS 78-1]	159373	64575	86303	tail	Escherichia_phage(38.46%)	28	NA	NA
Escherichia_coli_MS_78-1	GG773293	GG773293 Escherichia coli MS 78-1 genomic scaffold Scfld335, whole genome shotgun sequence. [Escherichia coli MS 78-1]	101419	6374	17385		Hokovirus(14.29%)	11	NA	NA
Escherichia_coli_MS_78-1	GG773253	GG773253 Escherichia coli MS 78-1 genomic scaffold Scfld120, whole genome shotgun sequence. [Escherichia coli MS 78-1]	7390	499	7136		Enterobacteria_phage(70.0%)	10	NA	NA
Escherichia_coli_MS_78-1	GG773316	GG773316 Escherichia coli MS 78-1 genomic scaffold Scfld694, whole genome shotgun sequence. [Escherichia coli MS 78-1]	12090	7359	12030	transposase	Shigella_phage(50.0%)	7	NA	NA
Escherichia_coli_MS_78-1	GG773325	GG773325 Escherichia coli MS 78-1 genomic scaffold Scfld784, whole genome shotgun sequence. [Escherichia coli MS 78-1]	39531	25048	32230		Acanthocystis_turfacea_Chlorella_virus(16.67%)	7	NA	NA
Escherichia_coli_MS_78-1	GG773220	GG773220 Escherichia coli MS 78-1 genomic scaffold Scfld14, whole genome shotgun sequence. [Escherichia coli MS 78-1]	15065	527	14936		Shigella_phage(68.42%)	22	NA	NA
Escherichia_coli_MS_78-1	GG773236	GG773236 Escherichia coli MS 78-1 genomic scaffold Scfld69, whole genome shotgun sequence. [Escherichia coli MS 78-1]	25223	3945	13444		Enterobacteria_phage(71.43%)	9	NA	NA
Escherichia_coli_MS_78-1	GG773275	GG773275 Escherichia coli MS 78-1 genomic scaffold Scfld218, whole genome shotgun sequence. [Escherichia coli MS 78-1]	42480	186	28092	transposase	Enterobacteria_phage(22.73%)	39	NA	NA
Escherichia_coli_MS_78-1	GG773266	GG773266 Escherichia coli MS 78-1 genomic scaffold Scfld188, whole genome shotgun sequence. [Escherichia coli MS 78-1]	20716	455	8308		Staphylococcus_phage(16.67%)	9	NA	NA
Escherichia_coli_MS_78-1	GG773328	GG773328 Escherichia coli MS 78-1 genomic scaffold Scfld807, whole genome shotgun sequence. [Escherichia coli MS 78-1]	15846	1805	10020	transposase	Enterobacteria_phage(66.67%)	9	NA	NA
Escherichia_coli_MS_182-1	GG771932	GG771932 Escherichia coli MS 182-1 genomic scaffold Scfld214, whole genome shotgun sequence. [Escherichia coli MS 182-1]	93678	53120	61896	integrase	Morganella_phage(50.0%)	12	48442:48454	63171:63183
Escherichia_coli_MS_182-1	GG771984	GG771984 Escherichia coli MS 182-1 genomic scaffold Scfld418, whole genome shotgun sequence. [Escherichia coli MS 182-1]	14205	616	14150		Enterobacteria_phage(38.89%)	22	NA	NA
Escherichia_coli_MS_182-1	GG771983	GG771983 Escherichia coli MS 182-1 genomic scaffold Scfld412, whole genome shotgun sequence. [Escherichia coli MS 182-1]	11149	9	11016	tail	Enterobacteria_phage(63.64%)	16	NA	NA
Escherichia_coli_MS_182-1	GG771972	GG771972 Escherichia coli MS 182-1 genomic scaffold Scfld373, whole genome shotgun sequence. [Escherichia coli MS 182-1]	171102	76172	87092		Hokovirus(14.29%)	10	NA	NA
Escherichia_coli_MS_182-1	GG772023	GG772023 Escherichia coli MS 182-1 genomic scaffold Scfld711, whole genome shotgun sequence. [Escherichia coli MS 182-1]	20655	12349	20202		Bradyrhizobium_phage(16.67%)	9	NA	NA
Escherichia_coli_MS_182-1	GG772014	GG772014 Escherichia coli MS 182-1 genomic scaffold Scfld637, whole genome shotgun sequence. [Escherichia coli MS 182-1]	73644	68149	73584		Enterobacteria_phage(70.0%)	10	NA	NA
Escherichia_coli_MS_182-1	GG772021	GG772021 Escherichia coli MS 182-1 genomic scaffold Scfld680, whole genome shotgun sequence. [Escherichia coli MS 182-1]	115101	10	5089	integrase	Escherichia_phage(16.67%)	7	2159:2172	5803:5816
Escherichia_coli_MS_182-1	GG772028	GG772028 Escherichia coli MS 182-1 genomic scaffold Scfld801, whole genome shotgun sequence. [Escherichia coli MS 182-1]	152998	132604	146890	tRNA	Escherichia_phage(77.78%)	20	NA	NA
Escherichia_coli_MS_182-1	GG771895	GG771895 Escherichia coli MS 182-1 genomic scaffold Scfld94, whole genome shotgun sequence. [Escherichia coli MS 182-1]	39594	15886	23026		Escherichia_phage(66.67%)	6	NA	NA
Escherichia_coli_MS_182-1	GG771977	GG771977 Escherichia coli MS 182-1 genomic scaffold Scfld384, whole genome shotgun sequence. [Escherichia coli MS 182-1]	7236	1484	7210	tail	Escherichia_phage(36.36%)	11	NA	NA
Escherichia_coli_MS_182-1	GG771904	GG771904 Escherichia coli MS 182-1 genomic scaffold Scfld122, whole genome shotgun sequence. [Escherichia coli MS 182-1]	13465	306	13438		Enterobacteria_phage(66.67%)	21	NA	NA
Escherichia_coli_MS_182-1	GG772034	GG772034 Escherichia coli MS 182-1 genomic scaffold Scfld893, whole genome shotgun sequence. [Escherichia coli MS 182-1]	96190	60476	70672	tRNA	Brazilian_cedratvirus(14.29%)	12	NA	NA
Escherichia_coli_MS_182-1	GG771964	GG771964 Escherichia coli MS 182-1 genomic scaffold Scfld348, whole genome shotgun sequence. [Escherichia coli MS 182-1]	104454	69539	79071		Enterobacteria_phage(71.43%)	9	NA	NA
Escherichia_coli_MS_182-1	GG771966	GG771966 Escherichia coli MS 182-1 genomic scaffold Scfld360, whole genome shotgun sequence. [Escherichia coli MS 182-1]	74740	47981	74691	protease	Enterobacteria_phage(81.82%)	34	NA	NA
Escherichia_coli_MS_182-1	GG771890	GG771890 Escherichia coli MS 182-1 genomic scaffold Scfld68, whole genome shotgun sequence. [Escherichia coli MS 182-1]	85203	75519	85128	tail	Enterobacteria_phage(88.89%)	11	NA	NA
Escherichia_coli_MS_182-1	GG772033	GG772033 Escherichia coli MS 182-1 genomic scaffold Scfld891, whole genome shotgun sequence. [Escherichia coli MS 182-1]	4678	9	4662	tail	Escherichia_phage(71.43%)	7	NA	NA
Escherichia_coli_MS_182-1	GG771889	GG771889 Escherichia coli MS 182-1 genomic scaffold Scfld67, whole genome shotgun sequence. [Escherichia coli MS 182-1]	28161	19067	28104		Enterobacteria_phage(28.57%)	14	NA	NA
Escherichia_coli_MS_182-1	GG771913	GG771913 Escherichia coli MS 182-1 genomic scaffold Scfld139, whole genome shotgun sequence. [Escherichia coli MS 182-1]	69954	126	21755		Salmonella_phage(34.78%)	25	NA	NA
Lactobacillus_rhamnosus_LMS2-1	GG692961	GG692961 Lactobacillus rhamnosus LMS2-1 genomic scaffold SCAFFOLD2, whole genome shotgun sequence. [Lactobacillus rhamnosus LMS2-1]	801735	734983	749729	transposase	Streptococcus_phage(72.73%)	13	NA	NA
Lactobacillus_rhamnosus_LMS2-1	GG692960	GG692960 Lactobacillus rhamnosus LMS2-1 genomic scaffold SCAFFOLD1, whole genome shotgun sequence. [Lactobacillus rhamnosus LMS2-1]	1071520	219	44964		Lactobacillus_phage(92.16%)	59	NA	NA
Lactobacillus_rhamnosus_LMS2-1	GG692960	GG692960 Lactobacillus rhamnosus LMS2-1 genomic scaffold SCAFFOLD1, whole genome shotgun sequence. [Lactobacillus rhamnosus LMS2-1]	1071520	547130	555384		Staphylococcus_phage(33.33%)	8	NA	NA
Lactobacillus_rhamnosus_LMS2-1	GG692960	GG692960 Lactobacillus rhamnosus LMS2-1 genomic scaffold SCAFFOLD1, whole genome shotgun sequence. [Lactobacillus rhamnosus LMS2-1]	1071520	636846	646053		Enterococcus_phage(33.33%)	8	NA	NA
Lactobacillus_rhamnosus_LMS2-1	GG692960	GG692960 Lactobacillus rhamnosus LMS2-1 genomic scaffold SCAFFOLD1, whole genome shotgun sequence. [Lactobacillus rhamnosus LMS2-1]	1071520	687702	715056		Lactobacillus_rhamnosus_Lc-Nu-like_prophage(43.48%)	28	NA	NA
Lactobacillus_rhamnosus_LMS2-1	GG692960	GG692960 Lactobacillus rhamnosus LMS2-1 genomic scaffold SCAFFOLD1, whole genome shotgun sequence. [Lactobacillus rhamnosus LMS2-1]	1071520	984159	992620		Prochlorococcus_phage(16.67%)	9	NA	NA
Lactobacillus_plantarum_subsp._plantarum_ATCC_14917_=_JCM_1149_=	GL379765	GL379765 Lactobacillus plantarum subsp. plantarum ATCC 14917 genomic scaffold SCAFFOLD5, whole genome shotgun sequence. [Lactobacillus plantarum subsp. plantarum ATCC 14917 = JCM 1149 =]	309096	60100	73875		Lactobacillus_phage(18.18%)	13	NA	NA
Lactobacillus_plantarum_subsp._plantarum_ATCC_14917_=_JCM_1149_=	GL379765	GL379765 Lactobacillus plantarum subsp. plantarum ATCC 14917 genomic scaffold SCAFFOLD5, whole genome shotgun sequence. [Lactobacillus plantarum subsp. plantarum ATCC 14917 = JCM 1149 =]	309096	274358	307058		Oenococcus_phage(46.43%)	39	NA	NA
Lactobacillus_plantarum_subsp._plantarum_ATCC_14917_=_JCM_1149_=	GL379762	GL379762 Lactobacillus plantarum subsp. plantarum ATCC 14917 genomic scaffold SCAFFOLD2, whole genome shotgun sequence. [Lactobacillus plantarum subsp. plantarum ATCC 14917 = JCM 1149 =]	693713	497256	541814	protease	Lactobacillus_phage(90.48%)	63	NA	NA
Lactobacillus_plantarum_subsp._plantarum_ATCC_14917_=_JCM_1149_=	GL379768	GL379768 Lactobacillus plantarum subsp. plantarum ATCC 14917 genomic scaffold SCAFFOLD8, whole genome shotgun sequence. [Lactobacillus plantarum subsp. plantarum ATCC 14917 = JCM 1149 =]	126404	34605	40788		Escherichia_phage(33.33%)	8	NA	NA
Lactobacillus_plantarum_subsp._plantarum_ATCC_14917_=_JCM_1149_=	GL379767	GL379767 Lactobacillus plantarum subsp. plantarum ATCC 14917 genomic scaffold SCAFFOLD7, whole genome shotgun sequence. [Lactobacillus plantarum subsp. plantarum ATCC 14917 = JCM 1149 =]	125298	224	9159		Lactobacillus_phage(100.0%)	11	NA	NA
Providencia_alcalifaciens_DSM_30120	ABXW01000045	ABXW01000045 Providencia alcalifaciens DSM 30120 P_alcalifaciens-1.0_Cont128.1, whole genome shotgun sequence. [Providencia alcalifaciens DSM 30120]	113917	42784	50171		Mycoplasma_phage(16.67%)	9	NA	NA
Providencia_alcalifaciens_DSM_30120	ABXW01000011	ABXW01000011 Providencia alcalifaciens DSM 30120 P_alcalifaciens-1.0_Cont12.1, whole genome shotgun sequence. [Providencia alcalifaciens DSM 30120]	17404	2576	17054		Proteus_phage(26.32%)	30	NA	NA
Providencia_alcalifaciens_DSM_30120	ABXW01000074	ABXW01000074 Providencia alcalifaciens DSM 30120 P_alcalifaciens-1.0_Cont165.1, whole genome shotgun sequence. [Providencia alcalifaciens DSM 30120]	102120	68309	99659		Pectobacterium_phage(19.44%)	50	NA	NA
Providencia_alcalifaciens_DSM_30120	ABXW01000062	ABXW01000062 Providencia alcalifaciens DSM 30120 P_alcalifaciens-1.0_Cont149.1, whole genome shotgun sequence. [Providencia alcalifaciens DSM 30120]	239118	137187	176328		Burkholderia_phage(23.53%)	51	NA	NA
Providencia_alcalifaciens_DSM_30120	ABXW01000051	ABXW01000051 Providencia alcalifaciens DSM 30120 P_alcalifaciens-1.0_Cont137.1, whole genome shotgun sequence. [Providencia alcalifaciens DSM 30120]	86914	59268	83956		Proteus_phage(32.0%)	49	NA	NA
Providencia_alcalifaciens_DSM_30120	ABXW01000046	ABXW01000046 Providencia alcalifaciens DSM 30120 P_alcalifaciens-1.0_Cont129.1, whole genome shotgun sequence. [Providencia alcalifaciens DSM 30120]	248369	107464	142465	integrase	Enterobacter_phage(23.33%)	42	116224:116238	139845:139859
Providencia_alcalifaciens_DSM_30120	ABXW01000046	ABXW01000046 Providencia alcalifaciens DSM 30120 P_alcalifaciens-1.0_Cont129.1, whole genome shotgun sequence. [Providencia alcalifaciens DSM 30120]	248369	229634	238527		Morganella_phage(70.0%)	13	NA	NA
Providencia_alcalifaciens_DSM_30120	ABXW01000046	ABXW01000046 Providencia alcalifaciens DSM 30120 P_alcalifaciens-1.0_Cont129.1, whole genome shotgun sequence. [Providencia alcalifaciens DSM 30120]	248369	241641	247559		Phage_21(33.33%)	9	NA	NA
Providencia_alcalifaciens_DSM_30120	ABXW01000048	ABXW01000048 Providencia alcalifaciens DSM 30120 P_alcalifaciens-1.0_Cont134.1, whole genome shotgun sequence. [Providencia alcalifaciens DSM 30120]	15757	8224	15696		Escherichia_phage(36.36%)	13	NA	NA
Providencia_alcalifaciens_DSM_30120	ABXW01000047	ABXW01000047 Providencia alcalifaciens DSM 30120 P_alcalifaciens-1.0_Cont130.1, whole genome shotgun sequence. [Providencia alcalifaciens DSM 30120]	255398	32514	41346	transposase	Dickeya_phage(33.33%)	9	NA	NA
Providencia_alcalifaciens_DSM_30120	ABXW01000079	ABXW01000079 Providencia alcalifaciens DSM 30120 P_alcalifaciens-1.0_Cont176.1, whole genome shotgun sequence. [Providencia alcalifaciens DSM 30120]	16690	61	5659		Cronobacter_phage(40.0%)	11	NA	NA
Providencia_alcalifaciens_DSM_30120	ABXW01000004	ABXW01000004 Providencia alcalifaciens DSM 30120 P_alcalifaciens-1.0_Cont3.1, whole genome shotgun sequence. [Providencia alcalifaciens DSM 30120]	351794	209346	229297	tail	Salmonella_phage(38.46%)	27	NA	NA
Providencia_alcalifaciens_DSM_30120	ABXW01000004	ABXW01000004 Providencia alcalifaciens DSM 30120 P_alcalifaciens-1.0_Cont3.1, whole genome shotgun sequence. [Providencia alcalifaciens DSM 30120]	351794	234463	242732		Enterobacteria_phage(28.57%)	13	NA	NA
Providencia_alcalifaciens_DSM_30120	ABXW01000014	ABXW01000014 Providencia alcalifaciens DSM 30120 P_alcalifaciens-1.0_Cont15.1, whole genome shotgun sequence. [Providencia alcalifaciens DSM 30120]	264404	40964	82970	protease	Morganella_phage(41.86%)	62	NA	NA
Providencia_alcalifaciens_DSM_30120	ABXW01000040	ABXW01000040 Providencia alcalifaciens DSM 30120 P_alcalifaciens-1.0_Cont122.1, whole genome shotgun sequence. [Providencia alcalifaciens DSM 30120]	7879	1852	7134		Pseudomonas_phage(25.0%)	8	NA	NA
Providencia_alcalifaciens_DSM_30120	ABXW01000017	ABXW01000017 Providencia alcalifaciens DSM 30120 P_alcalifaciens-1.0_Cont20.1, whole genome shotgun sequence. [Providencia alcalifaciens DSM 30120]	127375	100298	116208		Proteus_phage(31.58%)	34	NA	NA
Providencia_alcalifaciens_DSM_30120	ABXW01000017	ABXW01000017 Providencia alcalifaciens DSM 30120 P_alcalifaciens-1.0_Cont20.1, whole genome shotgun sequence. [Providencia alcalifaciens DSM 30120]	127375	119529	127277		Morganella_phage(33.33%)	10	NA	NA
Providencia_alcalifaciens_DSM_30120	ABXW01000078	ABXW01000078 Providencia alcalifaciens DSM 30120 P_alcalifaciens-1.0_Cont172.1, whole genome shotgun sequence. [Providencia alcalifaciens DSM 30120]	52405	12486	21109		Mycobacterium_phage(28.57%)	10	NA	NA
Providencia_alcalifaciens_DSM_30120	ABXW01000012	ABXW01000012 Providencia alcalifaciens DSM 30120 P_alcalifaciens-1.0_Cont13.1, whole genome shotgun sequence. [Providencia alcalifaciens DSM 30120]	18659	3034	18299		Proteus_phage(33.33%)	30	NA	NA
Lachnospiraceae_bacterium_8_1_57FAA	GL622452	GL622452 Lachnospiraceae bacterium 8_1_57FAA genomic scaffold supercont1.4, whole genome shotgun sequence. [Lachnospiraceae bacterium 8_1_57FAA]	235217	13787	50294	protease	Erysipelothrix_phage(66.67%)	43	NA	NA
Lachnospiraceae_bacterium_8_1_57FAA	GL622452	GL622452 Lachnospiraceae bacterium 8_1_57FAA genomic scaffold supercont1.4, whole genome shotgun sequence. [Lachnospiraceae bacterium 8_1_57FAA]	235217	140448	150937		Streptococcus_phage(46.15%)	16	NA	NA
Lachnospiraceae_bacterium_8_1_57FAA	GL622452	GL622452 Lachnospiraceae bacterium 8_1_57FAA genomic scaffold supercont1.4, whole genome shotgun sequence. [Lachnospiraceae bacterium 8_1_57FAA]	235217	154677	160681		Thermus_phage(28.57%)	11	NA	NA
Lachnospiraceae_bacterium_8_1_57FAA	GL622455	GL622455 Lachnospiraceae bacterium 8_1_57FAA genomic scaffold supercont1.7, whole genome shotgun sequence. [Lachnospiraceae bacterium 8_1_57FAA]	185173	25558	36478		Clostridium_phage(37.5%)	13	NA	NA
Lachnospiraceae_bacterium_8_1_57FAA	GL622455	GL622455 Lachnospiraceae bacterium 8_1_57FAA genomic scaffold supercont1.7, whole genome shotgun sequence. [Lachnospiraceae bacterium 8_1_57FAA]	185173	174970	185167		Streptococcus_phage(55.56%)	14	NA	NA
Lachnospiraceae_bacterium_8_1_57FAA	GL622449	GL622449 Lachnospiraceae bacterium 8_1_57FAA genomic scaffold supercont1.1, whole genome shotgun sequence. [Lachnospiraceae bacterium 8_1_57FAA]	795865	8762	40017		Clostridium_phage(31.82%)	42	NA	NA
Lachnospiraceae_bacterium_8_1_57FAA	GL622449	GL622449 Lachnospiraceae bacterium 8_1_57FAA genomic scaffold supercont1.1, whole genome shotgun sequence. [Lachnospiraceae bacterium 8_1_57FAA]	795865	447206	454593		Erysipelothrix_phage(77.78%)	11	NA	NA
Lachnospiraceae_bacterium_8_1_57FAA	GL622451	GL622451 Lachnospiraceae bacterium 8_1_57FAA genomic scaffold supercont1.3, whole genome shotgun sequence. [Lachnospiraceae bacterium 8_1_57FAA]	262014	252672	261857		Streptococcus_phage(100.0%)	13	NA	NA
Lactobacillus_reuteri_JCM_1112	AP007281	AP007281 Lactobacillus reuteri JCM 1112 DNA, complete genome. [Lactobacillus reuteri JCM 1112]	2039414	433876	444330	protease	Streptococcus_phage(33.33%)	9	NA	NA
Lactobacillus_reuteri_JCM_1112	AP007281	AP007281 Lactobacillus reuteri JCM 1112 DNA, complete genome. [Lactobacillus reuteri JCM 1112]	2039414	741187	752088		Staphylococcus_phage(37.5%)	13	NA	NA
Lactobacillus_reuteri_JCM_1112	AP007281	AP007281 Lactobacillus reuteri JCM 1112 DNA, complete genome. [Lactobacillus reuteri JCM 1112]	2039414	782032	791047	integrase	Lactobacillus_phage(42.86%)	10	775527:775541	789290:789304
Lactobacillus_reuteri_JCM_1112	AP007281	AP007281 Lactobacillus reuteri JCM 1112 DNA, complete genome. [Lactobacillus reuteri JCM 1112]	2039414	847594	855659	protease	Staphylococcus_phage(33.33%)	8	NA	NA
Lactobacillus_reuteri_JCM_1112	AP007281	AP007281 Lactobacillus reuteri JCM 1112 DNA, complete genome. [Lactobacillus reuteri JCM 1112]	2039414	878462	887951		Lactobacillus_phage(75.0%)	18	NA	NA
Lactobacillus_reuteri_JCM_1112	AP007281	AP007281 Lactobacillus reuteri JCM 1112 DNA, complete genome. [Lactobacillus reuteri JCM 1112]	2039414	1042243	1086715	transposase	Lactococcus_phage(11.11%)	49	NA	NA
Lactobacillus_reuteri_JCM_1112	AP007281	AP007281 Lactobacillus reuteri JCM 1112 DNA, complete genome. [Lactobacillus reuteri JCM 1112]	2039414	1094672	1163967	transposase	Lactococcus_phage(23.08%)	57	NA	NA
Lactobacillus_reuteri_JCM_1112	AP007281	AP007281 Lactobacillus reuteri JCM 1112 DNA, complete genome. [Lactobacillus reuteri JCM 1112]	2039414	1192521	1226789	transposase,protease	Lactobacillus_phage(69.23%)	36	NA	NA
Lactobacillus_reuteri_JCM_1112	AP007281	AP007281 Lactobacillus reuteri JCM 1112 DNA, complete genome. [Lactobacillus reuteri JCM 1112]	2039414	1233368	1241084		Lactobacillus_phage(28.57%)	13	NA	NA
Lactobacillus_reuteri_JCM_1112	AP007281	AP007281 Lactobacillus reuteri JCM 1112 DNA, complete genome. [Lactobacillus reuteri JCM 1112]	2039414	1421207	1455346	transposase,protease	Agrobacterium_phage(11.11%)	30	NA	NA
Helicobacter_pylori_HP250AFiii	KB642561	KB642561 Helicobacter pylori HP250AFiii genomic scaffold Scfld0, whole genome shotgun sequence. [Helicobacter pylori HP250AFiii]	5420	45	5266		Escherichia_phage(100.0%)	7	NA	NA
Helicobacter_pylori_HP250AFiii	KB642568	KB642568 Helicobacter pylori HP250AFiii genomic scaffold Scfld116, whole genome shotgun sequence. [Helicobacter pylori HP250AFiii]	98880	27507	38408		uncultured_Caudovirales_phage(33.33%)	10	NA	NA
Helicobacter_pylori_HP250AFiii	KB642579	KB642579 Helicobacter pylori HP250AFiii genomic scaffold Scfld166, whole genome shotgun sequence. [Helicobacter pylori HP250AFiii]	138176	97651	105905	tRNA	Synechococcus_phage(33.33%)	7	NA	NA
Anaerococcus_hydrogenalis_DSM_7454	ABXA01000036	ABXA01000036 Anaerococcus hydrogenalis DSM 7454 A_hydrogenalis-1.0_Cont146.1, whole genome shotgun sequence. [Anaerococcus hydrogenalis DSM 7454]	111385	26343	36558		Clostridium_phage(22.22%)	20	NA	NA
Anaerococcus_hydrogenalis_DSM_7454	ABXA01000012	ABXA01000012 Anaerococcus hydrogenalis DSM 7454 A_hydrogenalis-1.0_Cont40.1, whole genome shotgun sequence. [Anaerococcus hydrogenalis DSM 7454]	90509	68784	76837		Phaeocystis_globosa_virus(33.33%)	6	NA	NA
Anaerococcus_hydrogenalis_DSM_7454	ABXA01000049	ABXA01000049 Anaerococcus hydrogenalis DSM 7454 A_hydrogenalis-1.0_Cont189.1, whole genome shotgun sequence. [Anaerococcus hydrogenalis DSM 7454]	73454	21	10914	transposase	Bacillus_phage(28.57%)	11	NA	NA
Anaerococcus_hydrogenalis_DSM_7454	ABXA01000019	ABXA01000019 Anaerococcus hydrogenalis DSM 7454 A_hydrogenalis-1.0_Cont69.1, whole genome shotgun sequence. [Anaerococcus hydrogenalis DSM 7454]	229225	210809	219045		Staphylococcus_phage(71.43%)	14	NA	NA
Helicobacter_pylori_GAM96Ai	KB642178	KB642178 Helicobacter pylori GAM96Ai genomic scaffold Scfld116, whole genome shotgun sequence. [Helicobacter pylori GAM96Ai]	5416	16	5169		Escherichia_phage(100.0%)	7	NA	NA
Parabacteroides_merdae_ATCC_43184	DS264475	DS264475 Parabacteroides merdae ATCC 43184 Scfld0215 genomic scaffold, whole genome shotgun sequence. [Parabacteroides merdae ATCC 43184]	283185	105285	115521	tRNA	Klosneuvirus(16.67%)	8	NA	NA
Arcobacter_butzleri_JV22	GL622205	GL622205 Arcobacter butzleri JV22 genomic scaffold SCAFFOLD1, whole genome shotgun sequence. [Arcobacter butzleri JV22]	916260	253300	262400		Acanthamoeba_polyphaga_mimivirus(16.67%)	10	NA	NA
Arcobacter_butzleri_JV22	GL622205	GL622205 Arcobacter butzleri JV22 genomic scaffold SCAFFOLD1, whole genome shotgun sequence. [Arcobacter butzleri JV22]	916260	418894	427325		Acidithiobacillus_phage(16.67%)	10	NA	NA
Clostridium_perfringens_WAL-14572	JH594534	JH594534 Clostridium perfringens WAL-14572 genomic scaffold supercont1.2, whole genome shotgun sequence. [Clostridium perfringens WAL-14572]	414045	266823	301192	protease,integrase	Clostridium_phage(86.21%)	44	296713:296733	303130:303150
Clostridium_perfringens_WAL-14572	JH594542	JH594542 Clostridium perfringens WAL-14572 genomic scaffold supercont1.10, whole genome shotgun sequence. [Clostridium perfringens WAL-14572]	42203	5379	42151		Clostridium_phage(80.0%)	52	NA	NA
Clostridium_perfringens_WAL-14572	JH594535	JH594535 Clostridium perfringens WAL-14572 genomic scaffold supercont1.3, whole genome shotgun sequence. [Clostridium perfringens WAL-14572]	240882	154519	163235		Bacillus_phage(57.14%)	7	NA	NA
Clostridium_perfringens_WAL-14572	JH594533	JH594533 Clostridium perfringens WAL-14572 genomic scaffold supercont1.1, whole genome shotgun sequence. [Clostridium perfringens WAL-14572]	2084089	113676	126262		Synechococcus_phage(25.0%)	9	NA	NA
Clostridium_perfringens_WAL-14572	JH594533	JH594533 Clostridium perfringens WAL-14572 genomic scaffold supercont1.1, whole genome shotgun sequence. [Clostridium perfringens WAL-14572]	2084089	398505	436005		Clostridium_phage(51.52%)	51	NA	NA
Clostridium_perfringens_WAL-14572	JH594533	JH594533 Clostridium perfringens WAL-14572 genomic scaffold supercont1.1, whole genome shotgun sequence. [Clostridium perfringens WAL-14572]	2084089	1263838	1277093	tRNA	Clostridium_phage(22.22%)	12	NA	NA
Acinetobacter_junii_SH205	GG705011	GG705011 Acinetobacter junii SH205 genomic scaffold supercont1.1, whole genome shotgun sequence. [Acinetobacter junii SH205]	1986327	1448281	1498095	transposase,integrase	uncultured_Caudovirales_phage(39.22%)	80	1449952:1449974	1495784:1495806
Acinetobacter_junii_SH205	GG705011	GG705011 Acinetobacter junii SH205 genomic scaffold supercont1.1, whole genome shotgun sequence. [Acinetobacter junii SH205]	1986327	1544178	1554779		Bacteroides_phage(16.67%)	9	NA	NA
Bacteroides_sp._3_2_5	JH636043	JH636043 Bacteroides sp. 3_2_5 genomic scaffold supercont2.1, whole genome shotgun sequence. [Bacteroides sp. 3_2_5]	616139	437704	445450		Synechococcus_phage(16.67%)	12	NA	NA
Bacteroides_sp._3_2_5	JH636044	JH636044 Bacteroides sp. 3_2_5 genomic scaffold supercont2.2, whole genome shotgun sequence. [Bacteroides sp. 3_2_5]	3253542	2225885	2231371		Catovirus(33.33%)	6	NA	NA
Bifidobacterium_adolescentis_L2-32	DS264454	DS264454 Bifidobacterium adolescentis L2-32 Scfld0234 genomic scaffold, whole genome shotgun sequence. [Bifidobacterium adolescentis L2-32]	994221	1098	18003	tRNA	Gordonia_phage(20.0%)	29	NA	NA
Bifidobacterium_adolescentis_L2-32	DS264459	DS264459 Bifidobacterium adolescentis L2-32 Scfld0239 genomic scaffold, whole genome shotgun sequence. [Bifidobacterium adolescentis L2-32]	604548	276364	286507		Erysipelothrix_phage(14.29%)	9	NA	NA
Bifidobacterium_adolescentis_L2-32	DS264458	DS264458 Bifidobacterium adolescentis L2-32 Scfld0238 genomic scaffold, whole genome shotgun sequence. [Bifidobacterium adolescentis L2-32]	213084	83566	91270		Bifidobacterium_phage(33.33%)	10	NA	NA
Bifidobacterium_adolescentis_L2-32	DS264458	DS264458 Bifidobacterium adolescentis L2-32 Scfld0238 genomic scaffold, whole genome shotgun sequence. [Bifidobacterium adolescentis L2-32]	213084	102079	111868		Mycobacterium_phage(37.5%)	14	NA	NA
Bifidobacterium_adolescentis_L2-32	DS264455	DS264455 Bifidobacterium adolescentis L2-32 Scfld0235 genomic scaffold, whole genome shotgun sequence. [Bifidobacterium adolescentis L2-32]	289944	269002	287098		Propionibacterium_phage(35.71%)	18	NA	NA
Eubacterium_rectale_DSM_17629	FP929042	FP929042 Eubacterium rectale DSM 17629 draft genome. [Eubacterium rectale DSM 17629]	3344951	629263	636077		Staphylococcus_phage(66.67%)	7	NA	NA
Eubacterium_rectale_DSM_17629	FP929042	FP929042 Eubacterium rectale DSM 17629 draft genome. [Eubacterium rectale DSM 17629]	3344951	1506107	1538396	protease,transposase	unidentified_phage(75.0%)	45	NA	NA
Eubacterium_rectale_DSM_17629	FP929042	FP929042 Eubacterium rectale DSM 17629 draft genome. [Eubacterium rectale DSM 17629]	3344951	3038232	3051311		Clostridium_phage(33.33%)	19	NA	NA
Eubacterium_rectale_DSM_17629	FP929042	FP929042 Eubacterium rectale DSM 17629 draft genome. [Eubacterium rectale DSM 17629]	3344951	3054367	3059821		Clostridium_phage(50.0%)	12	NA	NA
Eubacterium_rectale_DSM_17629	FP929042	FP929042 Eubacterium rectale DSM 17629 draft genome. [Eubacterium rectale DSM 17629]	3344951	3069842	3079564		Lactococcus_phage(12.5%)	13	NA	NA
Eubacterium_rectale_DSM_17629	FP929042	FP929042 Eubacterium rectale DSM 17629 draft genome. [Eubacterium rectale DSM 17629]	3344951	3084585	3104879		Clostridium_phage(25.0%)	23	NA	NA
Helicobacter_pylori_GAM103Bi	KB636925	KB636925 Helicobacter pylori GAM103Bi genomic scaffold Scfld8, whole genome shotgun sequence. [Helicobacter pylori GAM103Bi]	5420	452	4681		Escherichia_phage(100.0%)	7	NA	NA
Bifidobacterium_pseudocatenulatum_DSM_20438_=_JCM_1200_=_LMG_10505	ABXX02000001	ABXX02000001 Bifidobacterium pseudocatenulatum DSM 20438 = JCM 1200 = LMG 10505 strain DSM 20438 B_pseudocatenulatum-1.0.1_Cont0.1, whole genome shotgun sequence. [Bifidobacterium pseudocatenulatum DSM 20438 = JCM 1200 = LMG 10505]	615913	154243	162640		Staphylococcus_phage(33.33%)	8	NA	NA
Helicobacter_bilis_ATCC_43879	KI392040	KI392040 Helicobacter bilis ATCC 43879 genomic scaffold supercont2.9, whole genome shotgun sequence. [Helicobacter bilis ATCC 43879]	1014704	451265	460257		Tupanvirus(16.67%)	8	NA	NA
Escherichia_coli_MS_84-1	GG771687	GG771687 Escherichia coli MS 84-1 genomic scaffold Scfld1096, whole genome shotgun sequence. [Escherichia coli MS 84-1]	520885	427569	440752		Escherichia_phage(50.0%)	12	NA	NA
Escherichia_coli_MS_84-1	GG771554	GG771554 Escherichia coli MS 84-1 genomic scaffold Scfld97, whole genome shotgun sequence. [Escherichia coli MS 84-1]	10951	2622	10721		Enterobacteria_phage(33.33%)	13	NA	NA
Escherichia_coli_MS_84-1	GG771569	GG771569 Escherichia coli MS 84-1 genomic scaffold Scfld169, whole genome shotgun sequence. [Escherichia coli MS 84-1]	134014	861	8528	tail	Salmonella_phage(75.0%)	8	NA	NA
Escherichia_coli_MS_84-1	GG771626	GG771626 Escherichia coli MS 84-1 genomic scaffold Scfld523, whole genome shotgun sequence. [Escherichia coli MS 84-1]	89428	60668	70562	tRNA	Brazilian_cedratvirus(14.29%)	12	NA	NA
Escherichia_coli_MS_84-1	GG771653	GG771653 Escherichia coli MS 84-1 genomic scaffold Scfld796, whole genome shotgun sequence. [Escherichia coli MS 84-1]	4037	230	3403		Escherichia_phage(50.0%)	7	NA	NA
Escherichia_coli_MS_84-1	GG771630	GG771630 Escherichia coli MS 84-1 genomic scaffold Scfld544, whole genome shotgun sequence. [Escherichia coli MS 84-1]	341978	75828	86678		Hokovirus(14.29%)	11	NA	NA
Escherichia_coli_MS_84-1	GG771556	GG771556 Escherichia coli MS 84-1 genomic scaffold Scfld101, whole genome shotgun sequence. [Escherichia coli MS 84-1]	187645	85544	95015		Enterobacteria_phage(75.0%)	10	NA	NA
Escherichia_coli_MS_84-1	GG771603	GG771603 Escherichia coli MS 84-1 genomic scaffold Scfld344, whole genome shotgun sequence. [Escherichia coli MS 84-1]	18108	1157	14650		Enterobacteria_phage(43.75%)	22	NA	NA
Escherichia_coli_MS_84-1	GG771691	GG771691 Escherichia coli MS 84-1 genomic scaffold Scfld1165, whole genome shotgun sequence. [Escherichia coli MS 84-1]	217777	68177	114848		Enterobacteria_phage(29.69%)	70	NA	NA
Escherichia_coli_MS_84-1	GG771691	GG771691 Escherichia coli MS 84-1 genomic scaffold Scfld1165, whole genome shotgun sequence. [Escherichia coli MS 84-1]	217777	193669	217103		Salmonella_phage(93.1%)	36	NA	NA
Escherichia_coli_MS_84-1	GG771571	GG771571 Escherichia coli MS 84-1 genomic scaffold Scfld171, whole genome shotgun sequence. [Escherichia coli MS 84-1]	39840	17511	39787		Enterobacteria_phage(36.67%)	30	NA	NA
Escherichia_coli_MS_84-1	GG771591	GG771591 Escherichia coli MS 84-1 genomic scaffold Scfld289, whole genome shotgun sequence. [Escherichia coli MS 84-1]	254734	31	18013		Enterobacteria_phage(44.44%)	29	NA	NA
Escherichia_coli_MS_84-1	GG771593	GG771593 Escherichia coli MS 84-1 genomic scaffold Scfld296, whole genome shotgun sequence. [Escherichia coli MS 84-1]	80644	74037	80526		Escherichia_phage(57.14%)	7	NA	NA
Escherichia_coli_MS_84-1	GG771640	GG771640 Escherichia coli MS 84-1 genomic scaffold Scfld661, whole genome shotgun sequence. [Escherichia coli MS 84-1]	35139	176	11623	integrase	Enterobacteria_phage(72.73%)	13	8506:8519	15854:15867
Escherichia_coli_MS_84-1	GG771654	GG771654 Escherichia coli MS 84-1 genomic scaffold Scfld829, whole genome shotgun sequence. [Escherichia coli MS 84-1]	14567	96	14061		Escherichia_phage(62.5%)	18	NA	NA
Escherichia_coli_MS_84-1	GG771636	GG771636 Escherichia coli MS 84-1 genomic scaffold Scfld624, whole genome shotgun sequence. [Escherichia coli MS 84-1]	94840	73279	94809	tRNA	Escherichia_phage(62.5%)	29	NA	NA
Escherichia_coli_MS_84-1	GG771656	GG771656 Escherichia coli MS 84-1 genomic scaffold Scfld834, whole genome shotgun sequence. [Escherichia coli MS 84-1]	4348	476	4309		Enterobacteria_phage(66.67%)	6	NA	NA
Escherichia_coli_MS_84-1	GG771665	GG771665 Escherichia coli MS 84-1 genomic scaffold Scfld867, whole genome shotgun sequence. [Escherichia coli MS 84-1]	32806	24644	32497		Bradyrhizobium_phage(16.67%)	9	NA	NA
Escherichia_coli_MS_84-1	GG771533	GG771533 Escherichia coli MS 84-1 genomic scaffold Scfld20, whole genome shotgun sequence. [Escherichia coli MS 84-1]	43649	113	16432	integrase	Enterobacteria_phage(30.77%)	20	3916:3928	7829:7841
Escherichia_coli_MS_84-1	GG771632	GG771632 Escherichia coli MS 84-1 genomic scaffold Scfld565, whole genome shotgun sequence. [Escherichia coli MS 84-1]	37114	23088	31373		Enterobacteria_phage(28.57%)	11	NA	NA
Collinsella_stercoris_DSM_13279	DS995474	DS995474 Collinsella stercoris DSM 13279 Scfld1 genomic scaffold, whole genome shotgun sequence. [Collinsella stercoris DSM 13279]	813517	91019	99174		Bacillus_phage(33.33%)	6	NA	NA
Collinsella_stercoris_DSM_13279	DS995476	DS995476 Collinsella stercoris DSM 13279 Scfld3 genomic scaffold, whole genome shotgun sequence. [Collinsella stercoris DSM 13279]	628718	180863	188253		Streptomyces_phage(16.67%)	7	NA	NA
Collinsella_stercoris_DSM_13279	DS995479	DS995479 Collinsella stercoris DSM 13279 Scfld6 genomic scaffold, whole genome shotgun sequence. [Collinsella stercoris DSM 13279]	286825	71833	91188		Streptococcus_phage(23.08%)	28	NA	NA
Enterococcus_faecalis_TX1342	GL454584	GL454584 Enterococcus faecalis TX1342 genomic scaffold Scfld258, whole genome shotgun sequence. [Enterococcus faecalis TX1342]	412277	15486	26400		Streptococcus_phage(50.0%)	12	NA	NA
Enterococcus_faecalis_TX1342	GL454561	GL454561 Enterococcus faecalis TX1342 genomic scaffold Scfld20, whole genome shotgun sequence. [Enterococcus faecalis TX1342]	167955	26435	34356	transposase	Planktothrix_phage(33.33%)	11	NA	NA
Enterococcus_faecalis_TX1342	GL454559	GL454559 Enterococcus faecalis TX1342 genomic scaffold Scfld7, whole genome shotgun sequence. [Enterococcus faecalis TX1342]	39231	26950	38492		Enterococcus_phage(46.15%)	23	NA	NA
Enterococcus_faecalis_TX1342	GL454579	GL454579 Enterococcus faecalis TX1342 genomic scaffold Scfld112, whole genome shotgun sequence. [Enterococcus faecalis TX1342]	105754	2008	25584	protease	Enterococcus_phage(27.27%)	25	NA	NA
Enterococcus_faecalis_TX1342	GL454582	GL454582 Enterococcus faecalis TX1342 genomic scaffold Scfld146, whole genome shotgun sequence. [Enterococcus faecalis TX1342]	368128	219327	226038		Enterococcus_phage(33.33%)	7	NA	NA
Enterococcus_faecalis_TX1342	GL454585	GL454585 Enterococcus faecalis TX1342 genomic scaffold Scfld283, whole genome shotgun sequence. [Enterococcus faecalis TX1342]	754011	93867	115800	tRNA,transposase	Enterococcus_phage(33.33%)	26	NA	NA
Enterococcus_faecalis_TX1342	GL454585	GL454585 Enterococcus faecalis TX1342 genomic scaffold Scfld283, whole genome shotgun sequence. [Enterococcus faecalis TX1342]	754011	552766	561410		Synechococcus_phage(50.0%)	9	NA	NA
Enterococcus_faecalis_TX1342	GL454585	GL454585 Enterococcus faecalis TX1342 genomic scaffold Scfld283, whole genome shotgun sequence. [Enterococcus faecalis TX1342]	754011	728078	739027		Enterococcus_phage(33.33%)	12	NA	NA
Enterococcus_faecalis_TX1342	GL454585	GL454585 Enterococcus faecalis TX1342 genomic scaffold Scfld283, whole genome shotgun sequence. [Enterococcus faecalis TX1342]	754011	744573	753911		Enterococcus_phage(75.0%)	10	NA	NA
Enterococcus_faecalis_TX1342	GL454566	GL454566 Enterococcus faecalis TX1342 genomic scaffold Scfld54, whole genome shotgun sequence. [Enterococcus faecalis TX1342]	89346	77099	88792		Enterococcus_phage(68.75%)	24	NA	NA
Erysipelatoclostridium_ramosum_DSM_1402	DS499656	DS499656 Clostridium ramosum DSM 1402 Scfld_02_7 genomic scaffold, whole genome shotgun sequence. [Erysipelatoclostridium ramosum DSM 1402]	360200	216962	225604	tRNA	Brevibacillus_phage(33.33%)	10	NA	NA
Erysipelatoclostridium_ramosum_DSM_1402	DS499657	DS499657 Clostridium ramosum DSM 1402 Scfld_02_8 genomic scaffold, whole genome shotgun sequence. [Erysipelatoclostridium ramosum DSM 1402]	240584	127310	140207		Synechococcus_phage(42.86%)	10	NA	NA
Erysipelatoclostridium_ramosum_DSM_1402	DS499659	DS499659 Clostridium ramosum DSM 1402 Scfld_02_10 genomic scaffold, whole genome shotgun sequence. [Erysipelatoclostridium ramosum DSM 1402]	965322	696935	702227		uncultured_phage(28.57%)	7	NA	NA
Erysipelatoclostridium_ramosum_DSM_1402	DS499659	DS499659 Clostridium ramosum DSM 1402 Scfld_02_10 genomic scaffold, whole genome shotgun sequence. [Erysipelatoclostridium ramosum DSM 1402]	965322	891243	926559		uncultured_Caudovirales_phage(28.57%)	54	NA	NA
Escherichia_coli_MS_185-1	GG774239	GG774239 Escherichia coli MS 185-1 genomic scaffold Scfld303, whole genome shotgun sequence. [Escherichia coli MS 185-1]	117634	99499	110361	tRNA	Escherichia_phage(50.0%)	7	NA	NA
Escherichia_coli_MS_185-1	GG774252	GG774252 Escherichia coli MS 185-1 genomic scaffold Scfld478, whole genome shotgun sequence. [Escherichia coli MS 185-1]	339143	294349	301489		Escherichia_phage(83.33%)	6	NA	NA
Escherichia_coli_MS_185-1	GG774226	GG774226 Escherichia coli MS 185-1 genomic scaffold Scfld225, whole genome shotgun sequence. [Escherichia coli MS 185-1]	111903	218	15357	integrase	Escherichia_phage(31.58%)	19	8870:8883	19687:19700
Escherichia_coli_MS_185-1	GG774226	GG774226 Escherichia coli MS 185-1 genomic scaffold Scfld225, whole genome shotgun sequence. [Escherichia coli MS 185-1]	111903	46438	56308	tRNA	Mycoplasma_phage(14.29%)	12	NA	NA
Escherichia_coli_MS_185-1	GG774266	GG774266 Escherichia coli MS 185-1 genomic scaffold Scfld957, whole genome shotgun sequence. [Escherichia coli MS 185-1]	58589	37168	44527		Mycobacterium_phage(33.33%)	7	NA	NA
Escherichia_coli_MS_185-1	GG774250	GG774250 Escherichia coli MS 185-1 genomic scaffold Scfld465, whole genome shotgun sequence. [Escherichia coli MS 185-1]	396618	92610	102154		Enterobacteria_phage(75.0%)	10	NA	NA
Escherichia_coli_MS_185-1	GG774250	GG774250 Escherichia coli MS 185-1 genomic scaffold Scfld465, whole genome shotgun sequence. [Escherichia coli MS 185-1]	396618	339903	352940		Escherichia_phage(83.33%)	6	NA	NA
Escherichia_coli_MS_185-1	GG774248	GG774248 Escherichia coli MS 185-1 genomic scaffold Scfld443, whole genome shotgun sequence. [Escherichia coli MS 185-1]	127043	70768	79740	tail	Escherichia_phage(57.14%)	8	NA	NA
Escherichia_coli_MS_185-1	GG774248	GG774248 Escherichia coli MS 185-1 genomic scaffold Scfld443, whole genome shotgun sequence. [Escherichia coli MS 185-1]	127043	83941	109960		Enterobacteria_phage(43.75%)	34	NA	NA
Escherichia_coli_MS_185-1	GG774263	GG774263 Escherichia coli MS 185-1 genomic scaffold Scfld727, whole genome shotgun sequence. [Escherichia coli MS 185-1]	35031	425	7183	protease,transposase	Stx2-converting_phage(42.86%)	10	NA	NA
Escherichia_coli_MS_185-1	GG774271	GG774271 Escherichia coli MS 185-1 genomic scaffold Scfld1233, whole genome shotgun sequence. [Escherichia coli MS 185-1]	355652	273096	284156		Sodalis_phage(14.29%)	11	NA	NA
Escherichia_coli_MS_185-1	GG774202	GG774202 Escherichia coli MS 185-1 genomic scaffold Scfld64, whole genome shotgun sequence. [Escherichia coli MS 185-1]	115694	84439	115401		Escherichia_phage(63.33%)	34	NA	NA
Escherichia_coli_MS_185-1	GG774206	GG774206 Escherichia coli MS 185-1 genomic scaffold Scfld86, whole genome shotgun sequence. [Escherichia coli MS 185-1]	49831	875	25593		Enterobacteria_phage(61.54%)	28	NA	NA
Escherichia_coli_MS_185-1	GG774206	GG774206 Escherichia coli MS 185-1 genomic scaffold Scfld86, whole genome shotgun sequence. [Escherichia coli MS 185-1]	49831	31663	49723		Enterobacteria_phage(47.06%)	37	NA	NA
Escherichia_coli_MS_185-1	GG774232	GG774232 Escherichia coli MS 185-1 genomic scaffold Scfld272, whole genome shotgun sequence. [Escherichia coli MS 185-1]	177897	66122	76352	integrase	Enterobacteria_phage(100.0%)	11	56445:56458	72930:72943
Escherichia_coli_MS_185-1	GG774267	GG774267 Escherichia coli MS 185-1 genomic scaffold Scfld966, whole genome shotgun sequence. [Escherichia coli MS 185-1]	11684	191	10900	transposase	Stx2-converting_phage(22.22%)	15	NA	NA
Ruminococcus_gnavus_ATCC_29149	AAYG02000029	AAYG02000029 Ruminococcus gnavus ATCC 29149 R_gnavus-1.0.1_Cont36.1, whole genome shotgun sequence. [Ruminococcus gnavus ATCC 29149]	34865	636	12308		Lactococcus_phage(22.22%)	19	NA	NA
Ruminococcus_gnavus_ATCC_29149	AAYG02000032	AAYG02000032 Ruminococcus gnavus ATCC 29149 R_gnavus-1.0.1_Cont378, whole genome shotgun sequence. [Ruminococcus gnavus ATCC 29149]	254130	683	7873		Streptococcus_phage(50.0%)	7	NA	NA
Ruminococcus_gnavus_ATCC_29149	AAYG02000018	AAYG02000018 Ruminococcus gnavus ATCC 29149 R_gnavus-1.0.1_Cont103, whole genome shotgun sequence. [Ruminococcus gnavus ATCC 29149]	173178	1790	27870	protease	Streptococcus_phage(40.0%)	34	NA	NA
Ruminococcus_gnavus_ATCC_29149	AAYG02000018	AAYG02000018 Ruminococcus gnavus ATCC 29149 R_gnavus-1.0.1_Cont103, whole genome shotgun sequence. [Ruminococcus gnavus ATCC 29149]	173178	85782	106688		Streptococcus_phage(81.25%)	26	NA	NA
Ruminococcus_gnavus_ATCC_29149	AAYG02000016	AAYG02000016 Ruminococcus gnavus ATCC 29149 R_gnavus-1.0.1_Cont46, whole genome shotgun sequence. [Ruminococcus gnavus ATCC 29149]	162619	35081	46621		unidentified_phage(25.0%)	19	NA	NA
Ruminococcus_gnavus_ATCC_29149	AAYG02000016	AAYG02000016 Ruminococcus gnavus ATCC 29149 R_gnavus-1.0.1_Cont46, whole genome shotgun sequence. [Ruminococcus gnavus ATCC 29149]	162619	49915	64311	transposase	unidentified_phage(60.0%)	16	NA	NA
Ruminococcus_gnavus_ATCC_29149	AAYG02000016	AAYG02000016 Ruminococcus gnavus ATCC 29149 R_gnavus-1.0.1_Cont46, whole genome shotgun sequence. [Ruminococcus gnavus ATCC 29149]	162619	133705	156339		Faecalibacterium_phage(22.22%)	44	NA	NA
Ruminococcus_gnavus_ATCC_29149	AAYG02000002	AAYG02000002 Ruminococcus gnavus ATCC 29149 R_gnavus-1.0.1_Cont13.1, whole genome shotgun sequence. [Ruminococcus gnavus ATCC 29149]	100795	46498	59304		Cronobacter_phage(11.11%)	18	NA	NA
Ruminococcus_gnavus_ATCC_29149	AAYG02000002	AAYG02000002 Ruminococcus gnavus ATCC 29149 R_gnavus-1.0.1_Cont13.1, whole genome shotgun sequence. [Ruminococcus gnavus ATCC 29149]	100795	68645	98335		Faecalibacterium_phage(78.26%)	35	NA	NA
Enterococcus_faecalis_TX1302	GL454548	GL454548 Enterococcus faecalis TX1302 genomic scaffold Scfld67, whole genome shotgun sequence. [Enterococcus faecalis TX1302]	86635	79937	85885		Enterococcus_phage(70.0%)	11	NA	NA
Enterococcus_faecalis_TX1302	GL454529	GL454529 Enterococcus faecalis TX1302 genomic scaffold Scfld5, whole genome shotgun sequence. [Enterococcus faecalis TX1302]	186320	47761	54472		Enterococcus_phage(33.33%)	7	NA	NA
Enterococcus_faecalis_TX1302	GL454555	GL454555 Enterococcus faecalis TX1302 genomic scaffold Scfld100, whole genome shotgun sequence. [Enterococcus faecalis TX1302]	682028	383	17656	tRNA	Enterococcus_phage(40.0%)	21	NA	NA
Enterococcus_faecalis_TX1302	GL454555	GL454555 Enterococcus faecalis TX1302 genomic scaffold Scfld100, whole genome shotgun sequence. [Enterococcus faecalis TX1302]	682028	448562	457208		Synechococcus_phage(50.0%)	9	NA	NA
Enterococcus_faecalis_TX1302	GL454555	GL454555 Enterococcus faecalis TX1302 genomic scaffold Scfld100, whole genome shotgun sequence. [Enterococcus faecalis TX1302]	682028	659801	681987		Enterococcus_phage(27.27%)	30	NA	NA
Enterococcus_faecalis_TX1302	GL454528	GL454528 Enterococcus faecalis TX1302 genomic scaffold Scfld4, whole genome shotgun sequence. [Enterococcus faecalis TX1302]	19698	5923	13588	transposase	Bacillus_phage(50.0%)	12	NA	NA
Enterococcus_faecalis_TX1302	GL454556	GL454556 Enterococcus faecalis TX1302 genomic scaffold Scfld105, whole genome shotgun sequence. [Enterococcus faecalis TX1302]	10870	274	10530	transposase	Streptococcus_phage(77.78%)	10	NA	NA
Enterococcus_faecalis_TX1302	GL454538	GL454538 Enterococcus faecalis TX1302 genomic scaffold Scfld27, whole genome shotgun sequence. [Enterococcus faecalis TX1302]	14136	339	14046		Streptococcus_phage(100.0%)	12	NA	NA
Enterococcus_faecalis_TX1302	GL454543	GL454543 Enterococcus faecalis TX1302 genomic scaffold Scfld40, whole genome shotgun sequence. [Enterococcus faecalis TX1302]	218522	133066	140986	transposase	Planktothrix_phage(33.33%)	11	NA	NA
Enterococcus_faecalis_TX1302	GL454537	GL454537 Enterococcus faecalis TX1302 genomic scaffold Scfld26, whole genome shotgun sequence. [Enterococcus faecalis TX1302]	236431	25912	36563		Enterococcus_phage(36.36%)	19	NA	NA
Enterococcus_faecalis_TX1302	GL454537	GL454537 Enterococcus faecalis TX1302 genomic scaffold Scfld26, whole genome shotgun sequence. [Enterococcus faecalis TX1302]	236431	41376	62886	protease	Enterococcus_phage(26.32%)	22	NA	NA
Enterococcus_faecalis_TX1302	GL454540	GL454540 Enterococcus faecalis TX1302 genomic scaffold Scfld33, whole genome shotgun sequence. [Enterococcus faecalis TX1302]	95319	69052	79965		Streptococcus_phage(50.0%)	12	NA	NA
Bacteroides_plebeius_DSM_17135	DS990134	DS990134 Bacteroides plebeius DSM 17135 Scfld_02_17 genomic scaffold, whole genome shotgun sequence. [Bacteroides plebeius DSM 17135]	722256	78934	89655		Mycobacterium_phage(25.0%)	9	NA	NA
Bacteroides_plebeius_DSM_17135	DS990118	DS990118 Bacteroides plebeius DSM 17135 Scfld_02_1 genomic scaffold, whole genome shotgun sequence. [Bacteroides plebeius DSM 17135]	287742	244194	255516		Riemerella_phage(18.18%)	14	NA	NA
Bacteroides_plebeius_DSM_17135	DS990132	DS990132 Bacteroides plebeius DSM 17135 Scfld_02_15 genomic scaffold, whole genome shotgun sequence. [Bacteroides plebeius DSM 17135]	148376	75365	88245	protease	unidentified_phage(57.14%)	14	NA	NA
Helicobacter_pylori_HP260AFii	KB642505	KB642505 Helicobacter pylori HP260AFii genomic scaffold Scfld41, whole genome shotgun sequence. [Helicobacter pylori HP260AFii]	5420	292	5409		Escherichia_phage(100.0%)	7	NA	NA
Helicobacter_pylori_HP260AFii	KB642477	KB642477 Helicobacter pylori HP260AFii genomic scaffold Scfld171, whole genome shotgun sequence. [Helicobacter pylori HP260AFii]	80987	40572	48903	tRNA	Synechococcus_phage(33.33%)	9	NA	NA
Ruminococcus_obeum_ATCC_29174	DS264338	DS264338 Ruminococcus obeum ATCC 29174 Scfld0249 genomic scaffold, whole genome shotgun sequence. [Ruminococcus obeum ATCC 29174]	433990	62758	69821		Streptococcus_phage(66.67%)	11	NA	NA
Ruminococcus_obeum_ATCC_29174	DS264338	DS264338 Ruminococcus obeum ATCC 29174 Scfld0249 genomic scaffold, whole genome shotgun sequence. [Ruminococcus obeum ATCC 29174]	433990	92805	100053		Bacillus_phage(33.33%)	8	NA	NA
Ruminococcus_obeum_ATCC_29174	DS264338	DS264338 Ruminococcus obeum ATCC 29174 Scfld0249 genomic scaffold, whole genome shotgun sequence. [Ruminococcus obeum ATCC 29174]	433990	351351	375157		Streptococcus_phage(65.0%)	27	NA	NA
Ruminococcus_obeum_ATCC_29174	DS264338	DS264338 Ruminococcus obeum ATCC 29174 Scfld0249 genomic scaffold, whole genome shotgun sequence. [Ruminococcus obeum ATCC 29174]	433990	383112	396067	protease	Geobacillus_virus(25.0%)	14	NA	NA
Ruminococcus_obeum_ATCC_29174	DS264342	DS264342 Ruminococcus obeum ATCC 29174 Scfld0253 genomic scaffold, whole genome shotgun sequence. [Ruminococcus obeum ATCC 29174]	102399	27436	40709		Streptococcus_phage(90.0%)	16	NA	NA
Ruminococcus_obeum_ATCC_29174	DS264311	DS264311 Ruminococcus obeum ATCC 29174 Scfld0222 genomic scaffold, whole genome shotgun sequence. [Ruminococcus obeum ATCC 29174]	217646	17877	63357		unidentified_phage(36.36%)	62	NA	NA
Ruminococcus_obeum_ATCC_29174	DS264311	DS264311 Ruminococcus obeum ATCC 29174 Scfld0222 genomic scaffold, whole genome shotgun sequence. [Ruminococcus obeum ATCC 29174]	217646	123101	131233	tRNA	Streptococcus_phage(50.0%)	8	NA	NA
Ruminococcus_obeum_ATCC_29174	DS264304	DS264304 Ruminococcus obeum ATCC 29174 Scfld0215 genomic scaffold, whole genome shotgun sequence. [Ruminococcus obeum ATCC 29174]	118432	29444	46150		Streptococcus_phage(85.71%)	20	NA	NA
Ruminococcus_obeum_ATCC_29174	DS264303	DS264303 Ruminococcus obeum ATCC 29174 Scfld0214 genomic scaffold, whole genome shotgun sequence. [Ruminococcus obeum ATCC 29174]	150462	26993	49082	protease	Clostridium_phage(50.0%)	28	NA	NA
Ruminococcus_obeum_ATCC_29174	DS264306	DS264306 Ruminococcus obeum ATCC 29174 Scfld0217 genomic scaffold, whole genome shotgun sequence. [Ruminococcus obeum ATCC 29174]	122734	53156	61196		Planktothrix_phage(16.67%)	10	NA	NA
Ruminococcus_obeum_ATCC_29174	DS264339	DS264339 Ruminococcus obeum ATCC 29174 Scfld0250 genomic scaffold, whole genome shotgun sequence. [Ruminococcus obeum ATCC 29174]	183429	157472	171623		Pandoravirus(33.33%)	12	NA	NA
Lachnospiraceae_Clostridium_clostridioforme_2_1_49FAA	JH376870	JH376870 Clostridium clostridioforme 2_1_49FAA genomic scaffold supercont1.1, whole genome shotgun sequence. [Lachnospiraceae [Clostridium] clostridioforme 2_1_49FAA]	1310576	305923	314394	transposase	Leptospira_phage(50.0%)	10	NA	NA
Lachnospiraceae_Clostridium_clostridioforme_2_1_49FAA	JH376870	JH376870 Clostridium clostridioforme 2_1_49FAA genomic scaffold supercont1.1, whole genome shotgun sequence. [Lachnospiraceae [Clostridium] clostridioforme 2_1_49FAA]	1310576	378111	385435		Lactobacillus_phage(33.33%)	8	NA	NA
Lachnospiraceae_Clostridium_clostridioforme_2_1_49FAA	JH376870	JH376870 Clostridium clostridioforme 2_1_49FAA genomic scaffold supercont1.1, whole genome shotgun sequence. [Lachnospiraceae [Clostridium] clostridioforme 2_1_49FAA]	1310576	861935	870000	transposase	unidentified_phage(50.0%)	11	NA	NA
Lachnospiraceae_Clostridium_clostridioforme_2_1_49FAA	JH376870	JH376870 Clostridium clostridioforme 2_1_49FAA genomic scaffold supercont1.1, whole genome shotgun sequence. [Lachnospiraceae [Clostridium] clostridioforme 2_1_49FAA]	1310576	890198	901247		Bacillus_phage(71.43%)	8	NA	NA
Lachnospiraceae_Clostridium_clostridioforme_2_1_49FAA	JH376881	JH376881 Clostridium clostridioforme 2_1_49FAA genomic scaffold supercont1.12, whole genome shotgun sequence. [Lachnospiraceae [Clostridium] clostridioforme 2_1_49FAA]	79205	27297	43480		Streptococcus_phage(27.27%)	17	NA	NA
Lachnospiraceae_Clostridium_clostridioforme_2_1_49FAA	JH376889	JH376889 Clostridium clostridioforme 2_1_49FAA genomic scaffold supercont1.20, whole genome shotgun sequence. [Lachnospiraceae [Clostridium] clostridioforme 2_1_49FAA]	19504	8480	15026		Bacillus_phage(33.33%)	7	NA	NA
Lachnospiraceae_Clostridium_clostridioforme_2_1_49FAA	JH376872	JH376872 Clostridium clostridioforme 2_1_49FAA genomic scaffold supercont1.3, whole genome shotgun sequence. [Lachnospiraceae [Clostridium] clostridioforme 2_1_49FAA]	722831	415805	427410		Erysipelothrix_phage(25.0%)	10	NA	NA
Lachnospiraceae_Clostridium_clostridioforme_2_1_49FAA	JH376871	JH376871 Clostridium clostridioforme 2_1_49FAA genomic scaffold supercont1.2, whole genome shotgun sequence. [Lachnospiraceae [Clostridium] clostridioforme 2_1_49FAA]	1202118	189775	202134		Streptococcus_phage(100.0%)	13	NA	NA
Clostridium_sporogenes_ATCC_15579	DS981517	DS981517 Clostridium sporogenes ATCC 15579 Scfld_02_0 genomic scaffold, whole genome shotgun sequence. [Clostridium sporogenes ATCC 15579]	2710723	568922	606826		Clostridium_phage(66.67%)	60	NA	NA
Clostridium_sporogenes_ATCC_15579	DS981517	DS981517 Clostridium sporogenes ATCC 15579 Scfld_02_0 genomic scaffold, whole genome shotgun sequence. [Clostridium sporogenes ATCC 15579]	2710723	619749	633708	tRNA	uncultured_Mediterranean_phage(37.5%)	14	NA	NA
Clostridium_sporogenes_ATCC_15579	DS981517	DS981517 Clostridium sporogenes ATCC 15579 Scfld_02_0 genomic scaffold, whole genome shotgun sequence. [Clostridium sporogenes ATCC 15579]	2710723	637463	668310		Clostridium_phage(74.07%)	37	NA	NA
Clostridium_sporogenes_ATCC_15579	DS981517	DS981517 Clostridium sporogenes ATCC 15579 Scfld_02_0 genomic scaffold, whole genome shotgun sequence. [Clostridium sporogenes ATCC 15579]	2710723	808835	818303		Synechococcus_phage(42.86%)	7	NA	NA
Clostridium_sporogenes_ATCC_15579	DS981517	DS981517 Clostridium sporogenes ATCC 15579 Scfld_02_0 genomic scaffold, whole genome shotgun sequence. [Clostridium sporogenes ATCC 15579]	2710723	2164125	2171062		uncultured_Caudovirales_phage(33.33%)	8	NA	NA
Clostridium_sporogenes_ATCC_15579	DS981517	DS981517 Clostridium sporogenes ATCC 15579 Scfld_02_0 genomic scaffold, whole genome shotgun sequence. [Clostridium sporogenes ATCC 15579]	2710723	2328364	2334767		Clostridium_phage(50.0%)	10	NA	NA
Clostridium_sporogenes_ATCC_15579	DS981518	DS981518 Clostridium sporogenes ATCC 15579 Scfld_02_1 genomic scaffold, whole genome shotgun sequence. [Clostridium sporogenes ATCC 15579]	1391602	181720	189890		Bacillus_phage(66.67%)	6	NA	NA
Clostridium_sporogenes_ATCC_15579	DS981518	DS981518 Clostridium sporogenes ATCC 15579 Scfld_02_1 genomic scaffold, whole genome shotgun sequence. [Clostridium sporogenes ATCC 15579]	1391602	551143	558347	protease	Tupanvirus(33.33%)	7	NA	NA
Helicobacter_pylori_GAM121Aii	KB636362	KB636362 Helicobacter pylori GAM121Aii genomic scaffold Scfld1, whole genome shotgun sequence. [Helicobacter pylori GAM121Aii]	5420	123	5053		Escherichia_phage(100.0%)	7	NA	NA
Helicobacter_pylori_GAM121Aii	KB636404	KB636404 Helicobacter pylori GAM121Aii genomic scaffold Scfld54, whole genome shotgun sequence. [Helicobacter pylori GAM121Aii]	103143	64804	75740		Bacillus_phage(16.67%)	9	NA	NA
Desulfovibrio_sp._3_1_syn3	ADDR02000001	ADDR02000001 Desulfovibrio sp. 3_1_syn3 acqcX-supercont2.1, whole genome shotgun sequence. [Desulfovibrio sp. 3_1_syn3]	2716392	93996	100780		uncultured_Mediterranean_phage(16.67%)	6	NA	NA
Desulfovibrio_sp._3_1_syn3	ADDR02000001	ADDR02000001 Desulfovibrio sp. 3_1_syn3 acqcX-supercont2.1, whole genome shotgun sequence. [Desulfovibrio sp. 3_1_syn3]	2716392	1895794	1909426	tRNA	Staphylococcus_phage(33.33%)	13	NA	NA
Desulfovibrio_sp._3_1_syn3	ADDR02000001	ADDR02000001 Desulfovibrio sp. 3_1_syn3 acqcX-supercont2.1, whole genome shotgun sequence. [Desulfovibrio sp. 3_1_syn3]	2716392	2151905	2210045	protease,transposase,tRNA,holin	Lactococcus_phage(12.5%)	49	NA	NA
Desulfovibrio_sp._3_1_syn3	ADDR02000001	ADDR02000001 Desulfovibrio sp. 3_1_syn3 acqcX-supercont2.1, whole genome shotgun sequence. [Desulfovibrio sp. 3_1_syn3]	2716392	2330042	2338263		Silicibacter_phage(33.33%)	9	NA	NA
Desulfovibrio_sp._3_1_syn3	ADDR02000001	ADDR02000001 Desulfovibrio sp. 3_1_syn3 acqcX-supercont2.1, whole genome shotgun sequence. [Desulfovibrio sp. 3_1_syn3]	2716392	2582846	2591259		Enterobacteria_phage(33.33%)	7	NA	NA
Desulfovibrio_sp._3_1_syn3	ADDR02000002	ADDR02000002 Desulfovibrio sp. 3_1_syn3 acqcX-supercont2.2, whole genome shotgun sequence. [Desulfovibrio sp. 3_1_syn3]	721572	636460	644554		Acidithiobacillus_phage(33.33%)	8	NA	NA
Helicobacter_pylori_GAM118Bi	KB644507	KB644507 Helicobacter pylori GAM118Bi genomic scaffold Scfld30, whole genome shotgun sequence. [Helicobacter pylori GAM118Bi]	5420	4	5391		Escherichia_phage(100.0%)	7	NA	NA
Lachnospiraceae_Clostridium_hylemonae_DSM_15053	GG657759	GG657759 Clostridium hylemonae DSM 15053 genomic scaffold Scfld_02_0, whole genome shotgun sequence. [Lachnospiraceae [Clostridium] hylemonae DSM 15053]	2898417	795525	805865		Orpheovirus(16.67%)	9	NA	NA
Lactobacillus_brevis_subsp._gravesensis_ATCC_27305	GG669608	GG669608 Lactobacillus brevis subsp. gravesensis ATCC 27305 genomic scaffold SCAFFOLD5, whole genome shotgun sequence. [Lactobacillus brevis subsp. gravesensis ATCC 27305]	737616	295588	304090	protease	Staphylococcus_phage(42.86%)	8	NA	NA
Lactobacillus_brevis_subsp._gravesensis_ATCC_27305	GG669608	GG669608 Lactobacillus brevis subsp. gravesensis ATCC 27305 genomic scaffold SCAFFOLD5, whole genome shotgun sequence. [Lactobacillus brevis subsp. gravesensis ATCC 27305]	737616	619015	631100	protease	Streptococcus_phage(25.0%)	9	NA	NA
Lactobacillus_brevis_subsp._gravesensis_ATCC_27305	GG669608	GG669608 Lactobacillus brevis subsp. gravesensis ATCC 27305 genomic scaffold SCAFFOLD5, whole genome shotgun sequence. [Lactobacillus brevis subsp. gravesensis ATCC 27305]	737616	668432	679953	tRNA	Enterococcus_phage(37.5%)	13	NA	NA
Lactobacillus_brevis_subsp._gravesensis_ATCC_27305	GG669604	GG669604 Lactobacillus brevis subsp. gravesensis ATCC 27305 genomic scaffold SCAFFOLD1, whole genome shotgun sequence. [Lactobacillus brevis subsp. gravesensis ATCC 27305]	1433332	660033	668600		Synechococcus_phage(33.33%)	9	NA	NA
Lactobacillus_helveticus_DSM_20075	GG700759	GG700759 Lactobacillus helveticus DSM 20075 genomic scaffold SCAFFOLD8, whole genome shotgun sequence. [Lactobacillus helveticus DSM 20075]	65851	34175	45270		uncultured_virus(42.86%)	8	NA	NA
Lactobacillus_helveticus_DSM_20075	GG700755	GG700755 Lactobacillus helveticus DSM 20075 genomic scaffold SCAFFOLD4, whole genome shotgun sequence. [Lactobacillus helveticus DSM 20075]	180524	1429	11733		Prochlorococcus_phage(16.67%)	9	NA	NA
Lactobacillus_helveticus_DSM_20075	GG700753	GG700753 Lactobacillus helveticus DSM 20075 genomic scaffold SCAFFOLD2, whole genome shotgun sequence. [Lactobacillus helveticus DSM 20075]	288743	242875	253220		Streptococcus_phage(42.86%)	9	NA	NA
Collinsella_tanakaei_YIT_12063	JH126468	JH126468 Collinsella tanakaei YIT 12063 genomic scaffold supercont1.2, whole genome shotgun sequence. [Collinsella tanakaei YIT 12063]	387327	221020	234820		Bacillus_phage(50.0%)	12	NA	NA
Collinsella_tanakaei_YIT_12063	JH126467	JH126467 Collinsella tanakaei YIT 12063 genomic scaffold supercont1.1, whole genome shotgun sequence. [Collinsella tanakaei YIT 12063]	684565	409969	434558	protease	Faecalibacterium_phage(55.0%)	38	NA	NA
Collinsella_tanakaei_YIT_12063	JH126469	JH126469 Collinsella tanakaei YIT 12063 genomic scaffold supercont1.3, whole genome shotgun sequence. [Collinsella tanakaei YIT 12063]	357900	316589	334992		Propionibacterium_phage(25.0%)	25	NA	NA
Klebsiella_sp._4_1_44FAA	JH414813	JH414813 Klebsiella sp. 4_1_44FAA genomic scaffold supercont1.16, whole genome shotgun sequence. [Klebsiella sp. 4_1_44FAA]	44166	9744	22706	transposase	Staphylococcus_phage(12.5%)	12	NA	NA
Klebsiella_sp._4_1_44FAA	JH414817	JH414817 Klebsiella sp. 4_1_44FAA genomic scaffold supercont1.20, whole genome shotgun sequence. [Klebsiella sp. 4_1_44FAA]	16194	832	8223		Enterobacteria_phage(33.33%)	6	NA	NA
Klebsiella_sp._4_1_44FAA	JH414800	JH414800 Klebsiella sp. 4_1_44FAA genomic scaffold supercont1.3, whole genome shotgun sequence. [Klebsiella sp. 4_1_44FAA]	548633	55360	62715		Streptococcus_phage(16.67%)	7	NA	NA
Klebsiella_sp._4_1_44FAA	JH414800	JH414800 Klebsiella sp. 4_1_44FAA genomic scaffold supercont1.3, whole genome shotgun sequence. [Klebsiella sp. 4_1_44FAA]	548633	533824	548014	tail,tRNA	Escherichia_phage(40.0%)	12	NA	NA
Klebsiella_sp._4_1_44FAA	JH414799	JH414799 Klebsiella sp. 4_1_44FAA genomic scaffold supercont1.2, whole genome shotgun sequence. [Klebsiella sp. 4_1_44FAA]	1091253	230582	244605	integrase,tRNA	Pseudomonas_phage(22.22%)	14	233624:233643	251891:251910
Klebsiella_sp._4_1_44FAA	JH414799	JH414799 Klebsiella sp. 4_1_44FAA genomic scaffold supercont1.2, whole genome shotgun sequence. [Klebsiella sp. 4_1_44FAA]	1091253	250394	299883	transposase	Salmonella_phage(21.67%)	74	NA	NA
Klebsiella_sp._4_1_44FAA	JH414799	JH414799 Klebsiella sp. 4_1_44FAA genomic scaffold supercont1.2, whole genome shotgun sequence. [Klebsiella sp. 4_1_44FAA]	1091253	773604	783066	protease,tRNA	Dickeya_phage(16.67%)	8	NA	NA
Klebsiella_sp._4_1_44FAA	JH414799	JH414799 Klebsiella sp. 4_1_44FAA genomic scaffold supercont1.2, whole genome shotgun sequence. [Klebsiella sp. 4_1_44FAA]	1091253	879665	908571	protease	Pectobacterium_phage(28.0%)	37	NA	NA
Klebsiella_sp._4_1_44FAA	JH414799	JH414799 Klebsiella sp. 4_1_44FAA genomic scaffold supercont1.2, whole genome shotgun sequence. [Klebsiella sp. 4_1_44FAA]	1091253	914591	926028		Klebsiella_phage(44.44%)	13	NA	NA
Klebsiella_sp._4_1_44FAA	JH414802	JH414802 Klebsiella sp. 4_1_44FAA genomic scaffold supercont1.5, whole genome shotgun sequence. [Klebsiella sp. 4_1_44FAA]	475085	304796	325917	integrase	Klebsiella_phage(47.37%)	27	318754:318768	323039:323053
Klebsiella_sp._4_1_44FAA	JH414816	JH414816 Klebsiella sp. 4_1_44FAA genomic scaffold supercont1.19, whole genome shotgun sequence. [Klebsiella sp. 4_1_44FAA]	18277	4883	12355	transposase	Macacine_betaherpesvirus(33.33%)	6	NA	NA
Klebsiella_sp._4_1_44FAA	JH414806	JH414806 Klebsiella sp. 4_1_44FAA genomic scaffold supercont1.9, whole genome shotgun sequence. [Klebsiella sp. 4_1_44FAA]	224106	202269	223767		Escherichia_phage(34.62%)	28	NA	NA
Klebsiella_sp._4_1_44FAA	JH414805	JH414805 Klebsiella sp. 4_1_44FAA genomic scaffold supercont1.8, whole genome shotgun sequence. [Klebsiella sp. 4_1_44FAA]	246589	54469	61460		Vibrio_phage(16.67%)	9	NA	NA
Klebsiella_sp._4_1_44FAA	JH414805	JH414805 Klebsiella sp. 4_1_44FAA genomic scaffold supercont1.8, whole genome shotgun sequence. [Klebsiella sp. 4_1_44FAA]	246589	238447	246536	integrase,transposase	Escherichia_phage(37.5%)	10	229653:229665	244929:244941
Klebsiella_sp._4_1_44FAA	JH414809	JH414809 Klebsiella sp. 4_1_44FAA genomic scaffold supercont1.12, whole genome shotgun sequence. [Klebsiella sp. 4_1_44FAA]	61333	4280	10334	transposase	Shigella_phage(66.67%)	8	NA	NA
Klebsiella_sp._4_1_44FAA	JH414798	JH414798 Klebsiella sp. 4_1_44FAA genomic scaffold supercont1.1, whole genome shotgun sequence. [Klebsiella sp. 4_1_44FAA]	1096638	615729	624249		Canarypox_virus(16.67%)	8	NA	NA
Streptococcus_sp._2_1_36FAA	KI391973	KI391973 Streptococcus sp. 2_1_36FAA genomic scaffold supercont2.2, whole genome shotgun sequence. [Streptococcus sp. 2_1_36FAA]	492057	158620	163379		Streptococcus_phage(100.0%)	7	NA	NA
Streptococcus_sp._2_1_36FAA	KI391973	KI391973 Streptococcus sp. 2_1_36FAA genomic scaffold supercont2.2, whole genome shotgun sequence. [Streptococcus sp. 2_1_36FAA]	492057	323428	332047		Streptococcus_phage(90.91%)	11	NA	NA
Streptococcus_sp._2_1_36FAA	KI391976	KI391976 Streptococcus sp. 2_1_36FAA genomic scaffold supercont2.5, whole genome shotgun sequence. [Streptococcus sp. 2_1_36FAA]	652197	616824	625859		Streptococcus_phage(33.33%)	9	NA	NA
Streptococcus_sp._2_1_36FAA	KI391974	KI391974 Streptococcus sp. 2_1_36FAA genomic scaffold supercont2.3, whole genome shotgun sequence. [Streptococcus sp. 2_1_36FAA]	571517	547074	556309	tRNA	Streptococcus_phage(66.67%)	12	NA	NA
Butyricicoccus_pullicaecorum_1.2	KB976104	KB976104 Butyricicoccus pullicaecorum 1.2 genomic scaffold acBRa-supercont1.2, whole genome shotgun sequence. [Butyricicoccus pullicaecorum 1.2]	816615	13348	61461	tRNA,protease,transposase	Faecalibacterium_phage(51.92%)	71	NA	NA
Butyricicoccus_pullicaecorum_1.2	KB976104	KB976104 Butyricicoccus pullicaecorum 1.2 genomic scaffold acBRa-supercont1.2, whole genome shotgun sequence. [Butyricicoccus pullicaecorum 1.2]	816615	243514	250066		Prochlorococcus_phage(33.33%)	7	NA	NA
Butyricicoccus_pullicaecorum_1.2	KB976103	KB976103 Butyricicoccus pullicaecorum 1.2 genomic scaffold acBRa-supercont1.1, whole genome shotgun sequence. [Butyricicoccus pullicaecorum 1.2]	1868409	225482	252796		unidentified_phage(11.76%)	35	NA	NA
Butyricicoccus_pullicaecorum_1.2	KB976103	KB976103 Butyricicoccus pullicaecorum 1.2 genomic scaffold acBRa-supercont1.1, whole genome shotgun sequence. [Butyricicoccus pullicaecorum 1.2]	1868409	258014	267098		unidentified_phage(16.67%)	8	NA	NA
Butyricicoccus_pullicaecorum_1.2	KB976103	KB976103 Butyricicoccus pullicaecorum 1.2 genomic scaffold acBRa-supercont1.1, whole genome shotgun sequence. [Butyricicoccus pullicaecorum 1.2]	1868409	273579	306956		Clostridium_phage(46.67%)	47	NA	NA
Butyricicoccus_pullicaecorum_1.2	KB976103	KB976103 Butyricicoccus pullicaecorum 1.2 genomic scaffold acBRa-supercont1.1, whole genome shotgun sequence. [Butyricicoccus pullicaecorum 1.2]	1868409	544724	556230		Erysipelothrix_phage(37.5%)	9	NA	NA
Butyricicoccus_pullicaecorum_1.2	KB976103	KB976103 Butyricicoccus pullicaecorum 1.2 genomic scaffold acBRa-supercont1.1, whole genome shotgun sequence. [Butyricicoccus pullicaecorum 1.2]	1868409	985342	996347	protease	Paenibacillus_phage(20.0%)	14	NA	NA
Butyricicoccus_pullicaecorum_1.2	KB976103	KB976103 Butyricicoccus pullicaecorum 1.2 genomic scaffold acBRa-supercont1.1, whole genome shotgun sequence. [Butyricicoccus pullicaecorum 1.2]	1868409	999796	1007619		unidentified_phage(28.57%)	8	NA	NA
Butyricicoccus_pullicaecorum_1.2	KB976103	KB976103 Butyricicoccus pullicaecorum 1.2 genomic scaffold acBRa-supercont1.1, whole genome shotgun sequence. [Butyricicoccus pullicaecorum 1.2]	1868409	1073168	1080029	transposase	Erysipelothrix_phage(14.29%)	10	NA	NA
Butyricicoccus_pullicaecorum_1.2	KB976103	KB976103 Butyricicoccus pullicaecorum 1.2 genomic scaffold acBRa-supercont1.1, whole genome shotgun sequence. [Butyricicoccus pullicaecorum 1.2]	1868409	1341645	1354771		Clostridium_phage(27.27%)	25	NA	NA
Butyricicoccus_pullicaecorum_1.2	KB976103	KB976103 Butyricicoccus pullicaecorum 1.2 genomic scaffold acBRa-supercont1.1, whole genome shotgun sequence. [Butyricicoccus pullicaecorum 1.2]	1868409	1754926	1761329		Streptococcus_phage(57.14%)	8	NA	NA
Lachnospiraceae_Clostridium_asparagiforme_DSM_15981	GG657588	GG657588 Clostridium asparagiforme DSM 15981 genomic scaffold Scfld2, whole genome shotgun sequence. [Lachnospiraceae [Clostridium asparagiforme] DSM 15981]	18747	10110	17013		uncultured_Caudovirales_phage(66.67%)	11	NA	NA
Lachnospiraceae_Clostridium_asparagiforme_DSM_15981	GG657592	GG657592 Clostridium asparagiforme DSM 15981 genomic scaffold Scfld6, whole genome shotgun sequence. [Lachnospiraceae [Clostridium asparagiforme] DSM 15981]	3356774	2223582	2249631		uncultured_Caudovirales_phage(68.0%)	33	NA	NA
Lachnospiraceae_Clostridium_asparagiforme_DSM_15981	GG657595	GG657595 Clostridium asparagiforme DSM 15981 genomic scaffold Scfld9, whole genome shotgun sequence. [Lachnospiraceae [Clostridium asparagiforme] DSM 15981]	561614	82050	126875		Clostridium_phage(25.0%)	51	NA	NA
Paenibacillus_sp._HGF5	AEXS01000167	AEXS01000167 Paenibacillus sp. HGF5 contig00015, whole genome shotgun sequence. [Paenibacillus sp. HGF5]	145629	113122	122524		Staphylococcus_phage(57.14%)	11	NA	NA
Paenibacillus_sp._HGF5	AEXS01000164	AEXS01000164 Paenibacillus sp. HGF5 contig00050, whole genome shotgun sequence. [Paenibacillus sp. HGF5]	33202	8975	16426		Escherichia_phage(50.0%)	7	NA	NA
Paenibacillus_sp._HGF5	AEXS01000088	AEXS01000088 Paenibacillus sp. HGF5 contig00218, whole genome shotgun sequence. [Paenibacillus sp. HGF5]	94620	55301	64257		Mollivirus(33.33%)	8	NA	NA
Paenibacillus_sp._HGF5	AEXS01000152	AEXS01000152 Paenibacillus sp. HGF5 contig00047, whole genome shotgun sequence. [Paenibacillus sp. HGF5]	81165	6898	48301		Bacteriophage(22.86%)	59	NA	NA
Paenibacillus_sp._HGF5	AEXS01000153	AEXS01000153 Paenibacillus sp. HGF5 contig00091, whole genome shotgun sequence. [Paenibacillus sp. HGF5]	54088	1824	35498		Bacillus_phage(25.0%)	37	NA	NA
Paenibacillus_sp._HGF5	AEXS01000131	AEXS01000131 Paenibacillus sp. HGF5 contig00053, whole genome shotgun sequence. [Paenibacillus sp. HGF5]	43926	29328	36459		Bacillus_phage(50.0%)	7	NA	NA
Paenibacillus_sp._HGF5	AEXS01000019	AEXS01000019 Paenibacillus sp. HGF5 contig00182, whole genome shotgun sequence. [Paenibacillus sp. HGF5]	290294	221249	258499	tRNA,holin,transposase	Bacillus_phage(45.45%)	45	NA	NA
Paenibacillus_sp._HGF5	AEXS01000107	AEXS01000107 Paenibacillus sp. HGF5 contig00125, whole genome shotgun sequence. [Paenibacillus sp. HGF5]	71156	41416	48058		Streptococcus_phage(33.33%)	7	NA	NA
Bacteroides_cellulosilyticus_DSM_14838	EQ973486	EQ973486 Bacteroides cellulosilyticus DSM 14838 genomic scaffold Scfld0, whole genome shotgun sequence. [Bacteroides cellulosilyticus DSM 14838]	303693	197259	207736		unidentified_phage(83.33%)	9	NA	NA
Bacteroides_cellulosilyticus_DSM_14838	EQ973489	EQ973489 Bacteroides cellulosilyticus DSM 14838 genomic scaffold Scfld3, whole genome shotgun sequence. [Bacteroides cellulosilyticus DSM 14838]	627148	26895	35824		Hokovirus(16.67%)	10	NA	NA
Coprococcus_sp._HPP0074	KE150435	KE150435 Coprococcus sp. HPP0074 genomic scaffold acAqD-supercont1.1, whole genome shotgun sequence. [Coprococcus sp. HPP0074]	1814818	788566	806549		Clostridium_phage(23.08%)	21	NA	NA
Coprococcus_sp._HPP0074	KE150435	KE150435 Coprococcus sp. HPP0074 genomic scaffold acAqD-supercont1.1, whole genome shotgun sequence. [Coprococcus sp. HPP0074]	1814818	1301297	1312722		Halovirus(12.5%)	11	NA	NA
Coprococcus_sp._HPP0074	KE150436	KE150436 Coprococcus sp. HPP0074 genomic scaffold acAqD-supercont1.2, whole genome shotgun sequence. [Coprococcus sp. HPP0074]	386540	74450	82474	transposase	Paenibacillus_phage(33.33%)	10	NA	NA
Coprococcus_sp._HPP0074	KE150436	KE150436 Coprococcus sp. HPP0074 genomic scaffold acAqD-supercont1.2, whole genome shotgun sequence. [Coprococcus sp. HPP0074]	386540	138640	146914	transposase	Acidithiobacillus_phage(33.33%)	8	NA	NA
Coprococcus_sp._HPP0074	KE150436	KE150436 Coprococcus sp. HPP0074 genomic scaffold acAqD-supercont1.2, whole genome shotgun sequence. [Coprococcus sp. HPP0074]	386540	302906	311740	transposase	Clostridioides_phage(16.67%)	7	NA	NA
Coprococcus_sp._HPP0074	KE150437	KE150437 Coprococcus sp. HPP0074 genomic scaffold acAqD-supercont1.3, whole genome shotgun sequence. [Coprococcus sp. HPP0074]	375048	89077	98599		Clostridioides_phage(16.67%)	7	NA	NA
Helicobacter_pylori_GAMchJs114i	KB644595	KB644595 Helicobacter pylori GAMchJs114i genomic scaffold Scfld178, whole genome shotgun sequence. [Helicobacter pylori GAMchJs114i]	81813	41446	49711	tRNA	Synechococcus_phage(33.33%)	7	NA	NA
Helicobacter_pylori_GAMchJs114i	KB644576	KB644576 Helicobacter pylori GAMchJs114i genomic scaffold Scfld10, whole genome shotgun sequence. [Helicobacter pylori GAMchJs114i]	5420	584	5371		Escherichia_phage(100.0%)	7	NA	NA
Helicobacter_pylori_GAMchJs114i	KB644588	KB644588 Helicobacter pylori GAMchJs114i genomic scaffold Scfld134, whole genome shotgun sequence. [Helicobacter pylori GAMchJs114i]	102266	63810	74787		uncultured_Caudovirales_phage(42.86%)	11	NA	NA
Desulfitobacterium_hafniense_DP7	JH414442	JH414442 Desulfitobacterium hafniense DP7 genomic scaffold Scfld30, whole genome shotgun sequence. [Desulfitobacterium hafniense DP7]	99225	13	19313		Clostridium_phage(14.29%)	24	NA	NA
Desulfitobacterium_hafniense_DP7	JH414485	JH414485 Desulfitobacterium hafniense DP7 genomic scaffold Scfld540, whole genome shotgun sequence. [Desulfitobacterium hafniense DP7]	454152	280692	290092		Clostridium_phage(50.0%)	11	NA	NA
Desulfitobacterium_hafniense_DP7	JH414485	JH414485 Desulfitobacterium hafniense DP7 genomic scaffold Scfld540, whole genome shotgun sequence. [Desulfitobacterium hafniense DP7]	454152	412603	425231		Escherichia_phage(62.5%)	13	NA	NA
Desulfitobacterium_hafniense_DP7	JH414441	JH414441 Desulfitobacterium hafniense DP7 genomic scaffold Scfld26, whole genome shotgun sequence. [Desulfitobacterium hafniense DP7]	96294	71947	95004		uncultured_Caudovirales_phage(23.53%)	30	NA	NA
Desulfitobacterium_hafniense_DP7	JH414464	JH414464 Desulfitobacterium hafniense DP7 genomic scaffold Scfld200, whole genome shotgun sequence. [Desulfitobacterium hafniense DP7]	193870	170094	179161		Staphylococcus_phage(66.67%)	8	NA	NA
Desulfitobacterium_hafniense_DP7	JH414491	JH414491 Desulfitobacterium hafniense DP7 genomic scaffold Scfld700, whole genome shotgun sequence. [Desulfitobacterium hafniense DP7]	596483	259093	267937		Streptococcus_phage(33.33%)	8	NA	NA
Desulfitobacterium_hafniense_DP7	JH414460	JH414460 Desulfitobacterium hafniense DP7 genomic scaffold Scfld144, whole genome shotgun sequence. [Desulfitobacterium hafniense DP7]	310153	60158	67943	tRNA	Orpheovirus(16.67%)	8	NA	NA
Desulfitobacterium_hafniense_DP7	JH414492	JH414492 Desulfitobacterium hafniense DP7 genomic scaffold Scfld701, whole genome shotgun sequence. [Desulfitobacterium hafniense DP7]	151439	38755	53149		Prochlorococcus_phage(22.22%)	10	NA	NA
Desulfitobacterium_hafniense_DP7	JH414492	JH414492 Desulfitobacterium hafniense DP7 genomic scaffold Scfld701, whole genome shotgun sequence. [Desulfitobacterium hafniense DP7]	151439	61795	79284		Clostridium_phage(33.33%)	25	NA	NA
Desulfitobacterium_hafniense_DP7	JH414482	JH414482 Desulfitobacterium hafniense DP7 genomic scaffold Scfld453, whole genome shotgun sequence. [Desulfitobacterium hafniense DP7]	494606	59045	65596	transposase	Bacillus_phage(33.33%)	6	NA	NA
Lactobacillus_rhamnosus_GG	AP011548	AP011548 Lactobacillus rhamnosus ATCC 53103 DNA, complete genome. [Lactobacillus rhamnosus GG]	3005051	404999	508031	transposase	Lactobacillus_phage(21.05%)	101	NA	NA
Lactobacillus_rhamnosus_GG	AP011548	AP011548 Lactobacillus rhamnosus ATCC 53103 DNA, complete genome. [Lactobacillus rhamnosus GG]	3005051	1099237	1138963		Lactobacillus_phage(86.0%)	63	NA	NA
Lactobacillus_rhamnosus_GG	AP011548	AP011548 Lactobacillus rhamnosus ATCC 53103 DNA, complete genome. [Lactobacillus rhamnosus GG]	3005051	1525337	1548200		Lactobacillus_phage(57.89%)	23	NA	NA
Lactobacillus_rhamnosus_GG	AP011548	AP011548 Lactobacillus rhamnosus ATCC 53103 DNA, complete genome. [Lactobacillus rhamnosus GG]	3005051	2103151	2110024		Lactococcus_phage(33.33%)	9	NA	NA
Bacteroides_sp._1_1_14	GG774705	GG774705 Bacteroides sp. 1_1_14 genomic scaffold supercont1.4, whole genome shotgun sequence. [Bacteroides sp. 1_1_14]	666181	94479	105218		Rhizobium_phage(12.5%)	19	NA	NA
Bacteroides_sp._1_1_14	GG774705	GG774705 Bacteroides sp. 1_1_14 genomic scaffold supercont1.4, whole genome shotgun sequence. [Bacteroides sp. 1_1_14]	666181	457347	466043	protease	Bodo_saltans_virus(16.67%)	6	NA	NA
Bacteroides_sp._1_1_14	GG774710	GG774710 Bacteroides sp. 1_1_14 genomic scaffold supercont1.9, whole genome shotgun sequence. [Bacteroides sp. 1_1_14]	312730	294032	301408		Catovirus(16.67%)	7	NA	NA
Bacteroides_sp._1_1_14	GG774704	GG774704 Bacteroides sp. 1_1_14 genomic scaffold supercont1.3, whole genome shotgun sequence. [Bacteroides sp. 1_1_14]	737299	679330	685296		Streptococcus_phage(100.0%)	10	NA	NA
Escherichia_coli_D9	GG657386	GG657386 Escherichia coli D9 genomic scaffold supercont1.3, whole genome shotgun sequence. [Escherichia coli D9]	617722	57121	96970		Shigella_phage(48.15%)	57	NA	NA
Escherichia_coli_D9	GG657389	GG657389 Escherichia coli D9 genomic scaffold supercont1.6, whole genome shotgun sequence. [Escherichia coli D9]	297723	63702	75474	protease	Vibrio_phage(28.57%)	7	NA	NA
Escherichia_coli_D9	GG657389	GG657389 Escherichia coli D9 genomic scaffold supercont1.6, whole genome shotgun sequence. [Escherichia coli D9]	297723	106811	143300	tail	Salmonella_phage(82.05%)	46	NA	NA
Escherichia_coli_D9	GG657384	GG657384 Escherichia coli D9 genomic scaffold supercont1.1, whole genome shotgun sequence. [Escherichia coli D9]	1667350	61963	71979	tRNA	Brazilian_cedratvirus(14.29%)	12	NA	NA
Escherichia_coli_D9	GG657384	GG657384 Escherichia coli D9 genomic scaffold supercont1.1, whole genome shotgun sequence. [Escherichia coli D9]	1667350	91287	97772		Escherichia_phage(57.14%)	7	NA	NA
Escherichia_coli_D9	GG657384	GG657384 Escherichia coli D9 genomic scaffold supercont1.1, whole genome shotgun sequence. [Escherichia coli D9]	1667350	246977	255813	integrase	Enterobacteria_phage(70.0%)	10	240970:240992	255975:255997
Escherichia_coli_D9	GG657384	GG657384 Escherichia coli D9 genomic scaffold supercont1.1, whole genome shotgun sequence. [Escherichia coli D9]	1667350	489153	498595		Enterobacteria_phage(75.0%)	10	NA	NA
Escherichia_coli_D9	GG657384	GG657384 Escherichia coli D9 genomic scaffold supercont1.1, whole genome shotgun sequence. [Escherichia coli D9]	1667350	590091	600500		Enterobacteria_phage(33.33%)	13	NA	NA
Escherichia_coli_D9	GG657384	GG657384 Escherichia coli D9 genomic scaffold supercont1.1, whole genome shotgun sequence. [Escherichia coli D9]	1667350	905038	915855		Sodalis_phage(14.29%)	11	NA	NA
Escherichia_coli_D9	GG657384	GG657384 Escherichia coli D9 genomic scaffold supercont1.1, whole genome shotgun sequence. [Escherichia coli D9]	1667350	1444645	1457787	tail,transposase	Enterobacteria_phage(23.08%)	17	NA	NA
Escherichia_coli_D9	GG657387	GG657387 Escherichia coli D9 genomic scaffold supercont1.4, whole genome shotgun sequence. [Escherichia coli D9]	507746	424	8277		Staphylococcus_phage(16.67%)	9	NA	NA
Escherichia_coli_D9	GG657390	GG657390 Escherichia coli D9 genomic scaffold supercont1.7, whole genome shotgun sequence. [Escherichia coli D9]	195279	110903	120963	integrase	Enterobacteria_phage(100.0%)	11	110396:110418	121124:121146
Escherichia_coli_D9	GG657385	GG657385 Escherichia coli D9 genomic scaffold supercont1.2, whole genome shotgun sequence. [Escherichia coli D9]	820470	373521	421206	transposase,tRNA	Shigella_phage(41.67%)	34	NA	NA
Escherichia_coli_D9	GG657385	GG657385 Escherichia coli D9 genomic scaffold supercont1.2, whole genome shotgun sequence. [Escherichia coli D9]	820470	714642	721782		Escherichia_phage(83.33%)	6	NA	NA
Escherichia_coli_MS_119-7	ADWU01000095	ADWU01000095 Escherichia coli MS 119-7 E_coliMS119-7-1.0.1_Cont94.1, whole genome shotgun sequence. [Escherichia coli MS 119-7]	2886	40	2845		Enterobacteria_phage(66.67%)	8	NA	NA
Escherichia_coli_MS_119-7	ADWU01000086	ADWU01000086 Escherichia coli MS 119-7 E_coliMS119-7-1.0.1_Cont85.1, whole genome shotgun sequence. [Escherichia coli MS 119-7]	4714	263	4425		Enterobacteria_phage(85.71%)	9	NA	NA
Escherichia_coli_MS_119-7	ADWU01000067	ADWU01000067 Escherichia coli MS 119-7 E_coliMS119-7-1.0.1_Cont66.1, whole genome shotgun sequence. [Escherichia coli MS 119-7]	11550	376	10925		Enterobacteria_phage(69.23%)	14	NA	NA
Escherichia_coli_MS_119-7	ADWU01000023	ADWU01000023 Escherichia coli MS 119-7 E_coliMS119-7-1.0.1_Cont22.1, whole genome shotgun sequence. [Escherichia coli MS 119-7]	76596	3592	11444		Staphylococcus_phage(16.67%)	9	NA	NA
Escherichia_coli_MS_119-7	ADWU01000023	ADWU01000023 Escherichia coli MS 119-7 E_coliMS119-7-1.0.1_Cont22.1, whole genome shotgun sequence. [Escherichia coli MS 119-7]	76596	63505	76145		Shigella_phage(66.67%)	16	NA	NA
Escherichia_coli_MS_119-7	ADWU01000005	ADWU01000005 Escherichia coli MS 119-7 E_coliMS119-7-1.0.1_Cont4.1, whole genome shotgun sequence. [Escherichia coli MS 119-7]	190098	173626	182739		Klebsiella_phage(33.33%)	6	NA	NA
Escherichia_coli_MS_119-7	ADWU01000083	ADWU01000083 Escherichia coli MS 119-7 E_coliMS119-7-1.0.1_Cont82.1, whole genome shotgun sequence. [Escherichia coli MS 119-7]	5225	370	4894		Enterobacteria_phage(33.33%)	12	NA	NA
Escherichia_coli_MS_119-7	ADWU01000079	ADWU01000079 Escherichia coli MS 119-7 E_coliMS119-7-1.0.1_Cont78.1, whole genome shotgun sequence. [Escherichia coli MS 119-7]	7211	195	7188		Escherichia_phage(57.14%)	7	NA	NA
Escherichia_coli_MS_119-7	ADWU01000052	ADWU01000052 Escherichia coli MS 119-7 E_coliMS119-7-1.0.1_Cont51.1, whole genome shotgun sequence. [Escherichia coli MS 119-7]	25990	232	25874	transposase	Shigella_phage(55.88%)	36	NA	NA
Escherichia_coli_MS_119-7	ADWU01000042	ADWU01000042 Escherichia coli MS 119-7 E_coliMS119-7-1.0.1_Cont41.1, whole genome shotgun sequence. [Escherichia coli MS 119-7]	37083	27581	37072	transposase	Acinetobacter_phage(16.67%)	10	NA	NA
Escherichia_coli_MS_119-7	ADWU01000056	ADWU01000056 Escherichia coli MS 119-7 E_coliMS119-7-1.0.1_Cont55.1, whole genome shotgun sequence. [Escherichia coli MS 119-7]	21453	1281	21211		Escherichia_phage(25.93%)	29	NA	NA
Escherichia_coli_MS_119-7	ADWU01000002	ADWU01000002 Escherichia coli MS 119-7 E_coliMS119-7-1.0.1_Cont1.1, whole genome shotgun sequence. [Escherichia coli MS 119-7]	255635	40466	47606		Escherichia_phage(83.33%)	6	NA	NA
Escherichia_coli_MS_119-7	ADWU01000026	ADWU01000026 Escherichia coli MS 119-7 E_coliMS119-7-1.0.1_Cont25.1, whole genome shotgun sequence. [Escherichia coli MS 119-7]	72308	4086	14047	tRNA,protease	Dickeya_phage(16.67%)	8	NA	NA
Escherichia_coli_MS_119-7	ADWU01000066	ADWU01000066 Escherichia coli MS 119-7 E_coliMS119-7-1.0.1_Cont65.1, whole genome shotgun sequence. [Escherichia coli MS 119-7]	11853	238	7251		Escherichia_phage(28.57%)	10	NA	NA
Escherichia_coli_MS_119-7	ADWU01000008	ADWU01000008 Escherichia coli MS 119-7 E_coliMS119-7-1.0.1_Cont7.1, whole genome shotgun sequence. [Escherichia coli MS 119-7]	133830	15348	24790		Enterobacteria_phage(75.0%)	10	NA	NA
Escherichia_coli_MS_119-7	ADWU01000008	ADWU01000008 Escherichia coli MS 119-7 E_coliMS119-7-1.0.1_Cont7.1, whole genome shotgun sequence. [Escherichia coli MS 119-7]	133830	116048	124015		Escherichia_phage(33.33%)	8	NA	NA
Escherichia_coli_MS_119-7	ADWU01000070	ADWU01000070 Escherichia coli MS 119-7 E_coliMS119-7-1.0.1_Cont69.1, whole genome shotgun sequence. [Escherichia coli MS 119-7]	11259	1920	10923		Escherichia_phage(50.0%)	6	NA	NA
Escherichia_coli_MS_119-7	ADWU01000034	ADWU01000034 Escherichia coli MS 119-7 E_coliMS119-7-1.0.1_Cont33.1, whole genome shotgun sequence. [Escherichia coli MS 119-7]	49826	217	6680	protease	Salmonella_phage(33.33%)	7	NA	NA
Escherichia_coli_MS_119-7	ADWU01000053	ADWU01000053 Escherichia coli MS 119-7 E_coliMS119-7-1.0.1_Cont52.1, whole genome shotgun sequence. [Escherichia coli MS 119-7]	25816	402	25802	transposase	Salmonella_phage(68.75%)	36	NA	NA
Escherichia_coli_MS_119-7	ADWU01000059	ADWU01000059 Escherichia coli MS 119-7 E_coliMS119-7-1.0.1_Cont58.1, whole genome shotgun sequence. [Escherichia coli MS 119-7]	16822	33	16715	transposase	Enterobacteria_phage(58.82%)	18	NA	NA
Escherichia_coli_MS_119-7	ADWU01000003	ADWU01000003 Escherichia coli MS 119-7 E_coliMS119-7-1.0.1_Cont2.1, whole genome shotgun sequence. [Escherichia coli MS 119-7]	244605	61026	71042	tRNA	Brazilian_cedratvirus(14.29%)	12	NA	NA
Escherichia_coli_MS_119-7	ADWU01000003	ADWU01000003 Escherichia coli MS 119-7 E_coliMS119-7-1.0.1_Cont2.1, whole genome shotgun sequence. [Escherichia coli MS 119-7]	244605	90187	96482		Escherichia_phage(50.0%)	6	NA	NA
Escherichia_coli_MS_119-7	ADWU01000014	ADWU01000014 Escherichia coli MS 119-7 E_coliMS119-7-1.0.1_Cont13.1, whole genome shotgun sequence. [Escherichia coli MS 119-7]	109018	146	12694	tRNA	Escherichia_phage(66.67%)	18	NA	NA
Escherichia_coli_MS_119-7	ADWU01000024	ADWU01000024 Escherichia coli MS 119-7 E_coliMS119-7-1.0.1_Cont23.1, whole genome shotgun sequence. [Escherichia coli MS 119-7]	73284	65044	73197		Escherichia_phage(33.33%)	9	NA	NA
Escherichia_coli_MS_119-7	ADWU01000006	ADWU01000006 Escherichia coli MS 119-7 E_coliMS119-7-1.0.1_Cont5.1, whole genome shotgun sequence. [Escherichia coli MS 119-7]	180394	23459	34278		Sodalis_phage(14.29%)	11	NA	NA
Escherichia_coli_MS_119-7	ADWU01000006	ADWU01000006 Escherichia coli MS 119-7 E_coliMS119-7-1.0.1_Cont5.1, whole genome shotgun sequence. [Escherichia coli MS 119-7]	180394	167839	177696		Salmonella_phage(16.67%)	12	NA	NA
Escherichia_coli_MS_119-7	ADWU01000020	ADWU01000020 Escherichia coli MS 119-7 E_coliMS119-7-1.0.1_Cont19.1, whole genome shotgun sequence. [Escherichia coli MS 119-7]	87687	703	7877	transposase	Escherichia_phage(44.44%)	9	NA	NA
Lactobacillus_paracasei_subsp._paracasei_ATCC_25302	GG670153	GG670153 Lactobacillus paracasei subsp. paracasei ATCC 25302 genomic scaffold SCAFFOLD2, whole genome shotgun sequence. [Lactobacillus paracasei subsp. paracasei ATCC 25302]	272109	219673	233449		Lactobacillus_phage(71.43%)	27	NA	NA
Lactobacillus_paracasei_subsp._paracasei_ATCC_25302	GG670157	GG670157 Lactobacillus paracasei subsp. paracasei ATCC 25302 genomic scaffold SCAFFOLD6, whole genome shotgun sequence. [Lactobacillus paracasei subsp. paracasei ATCC 25302]	203451	93067	134460		Lactobacillus_phage(56.82%)	58	NA	NA
Lactobacillus_paracasei_subsp._paracasei_ATCC_25302	GG670152	GG670152 Lactobacillus paracasei subsp. paracasei ATCC 25302 genomic scaffold SCAFFOLD1, whole genome shotgun sequence. [Lactobacillus paracasei subsp. paracasei ATCC 25302]	1055822	2789	39717	protease	Lactobacillus_phage(76.74%)	47	NA	NA
Lactobacillus_paracasei_subsp._paracasei_ATCC_25302	GG670152	GG670152 Lactobacillus paracasei subsp. paracasei ATCC 25302 genomic scaffold SCAFFOLD1, whole genome shotgun sequence. [Lactobacillus paracasei subsp. paracasei ATCC 25302]	1055822	117967	126429		Synechococcus_phage(33.33%)	9	NA	NA
Lactobacillus_paracasei_subsp._paracasei_ATCC_25302	GG670152	GG670152 Lactobacillus paracasei subsp. paracasei ATCC 25302 genomic scaffold SCAFFOLD1, whole genome shotgun sequence. [Lactobacillus paracasei subsp. paracasei ATCC 25302]	1055822	490772	498972		Staphylococcus_phage(33.33%)	8	NA	NA
Lactobacillus_paracasei_subsp._paracasei_ATCC_25302	GG670152	GG670152 Lactobacillus paracasei subsp. paracasei ATCC 25302 genomic scaffold SCAFFOLD1, whole genome shotgun sequence. [Lactobacillus paracasei subsp. paracasei ATCC 25302]	1055822	593336	604179	tRNA	unidentified_phage(16.67%)	10	NA	NA
Lactobacillus_paracasei_subsp._paracasei_ATCC_25302	GG670152	GG670152 Lactobacillus paracasei subsp. paracasei ATCC 25302 genomic scaffold SCAFFOLD1, whole genome shotgun sequence. [Lactobacillus paracasei subsp. paracasei ATCC 25302]	1055822	917929	927272	protease	Streptococcus_phage(33.33%)	8	NA	NA
Lactobacillus_paracasei_subsp._paracasei_ATCC_25302	GG670152	GG670152 Lactobacillus paracasei subsp. paracasei ATCC 25302 genomic scaffold SCAFFOLD1, whole genome shotgun sequence. [Lactobacillus paracasei subsp. paracasei ATCC 25302]	1055822	1011383	1017159		Lactobacillus_phage(75.0%)	9	NA	NA
Lactobacillus_paracasei_subsp._paracasei_ATCC_25302	GG670152	GG670152 Lactobacillus paracasei subsp. paracasei ATCC 25302 genomic scaffold SCAFFOLD1, whole genome shotgun sequence. [Lactobacillus paracasei subsp. paracasei ATCC 25302]	1055822	1020434	1055603		Lactobacillus_phage(92.86%)	53	NA	NA
Helicobacter_pylori_GAM100Ai	JH976563	JH976563 Helicobacter pylori GAM100Ai genomic scaffold Scfld8, whole genome shotgun sequence. [Helicobacter pylori GAM100Ai]	76611	38146	49113		Bacillus_phage(16.67%)	9	NA	NA
Helicobacter_pylori_GAM100Ai	JH976578	JH976578 Helicobacter pylori GAM100Ai genomic scaffold Scfld36, whole genome shotgun sequence. [Helicobacter pylori GAM100Ai]	5418	697	4926		Escherichia_phage(100.0%)	7	NA	NA
Clostridium_sp._D5	GL870812	GL870812 Clostridium sp. D5 genomic scaffold supercont1.4, whole genome shotgun sequence. [Clostridium sp. D5]	402542	257233	272394		Streptococcus_phage(37.5%)	10	NA	NA
Clostridium_sp._D5	GL870810	GL870810 Clostridium sp. D5 genomic scaffold supercont1.2, whole genome shotgun sequence. [Clostridium sp. D5]	452046	8217	23841		Enterococcus_phage(36.36%)	19	NA	NA
Erysipelotrichaceae_bacterium_2_2_44A	JH126438	JH126438 Erysipelotrichaceae bacterium 2_2_44A genomic scaffold supercont1.8, whole genome shotgun sequence. [Erysipelotrichaceae bacterium 2_2_44A]	174512	159393	167077		Clostridium_phage(33.33%)	6	NA	NA
Erysipelotrichaceae_bacterium_2_2_44A	JH126432	JH126432 Erysipelotrichaceae bacterium 2_2_44A genomic scaffold supercont1.2, whole genome shotgun sequence. [Erysipelotrichaceae bacterium 2_2_44A]	685089	94563	103083	integrase	Staphylococcus_phage(16.67%)	10	98992:99009	104647:104664
Erysipelotrichaceae_bacterium_2_2_44A	JH126433	JH126433 Erysipelotrichaceae bacterium 2_2_44A genomic scaffold supercont1.3, whole genome shotgun sequence. [Erysipelotrichaceae bacterium 2_2_44A]	622692	13227	36525	transposase	Streptococcus_phage(80.0%)	28	NA	NA
Erysipelotrichaceae_bacterium_2_2_44A	JH126433	JH126433 Erysipelotrichaceae bacterium 2_2_44A genomic scaffold supercont1.3, whole genome shotgun sequence. [Erysipelotrichaceae bacterium 2_2_44A]	622692	126234	148358		Streptococcus_phage(87.5%)	30	NA	NA
Erysipelotrichaceae_bacterium_2_2_44A	JH126433	JH126433 Erysipelotrichaceae bacterium 2_2_44A genomic scaffold supercont1.3, whole genome shotgun sequence. [Erysipelotrichaceae bacterium 2_2_44A]	622692	266360	280670		Staphylococcus_phage(16.67%)	23	NA	NA
Erysipelotrichaceae_bacterium_2_2_44A	JH126433	JH126433 Erysipelotrichaceae bacterium 2_2_44A genomic scaffold supercont1.3, whole genome shotgun sequence. [Erysipelotrichaceae bacterium 2_2_44A]	622692	284496	309564		Clostridium_phage(55.0%)	31	NA	NA
Erysipelotrichaceae_bacterium_2_2_44A	JH126433	JH126433 Erysipelotrichaceae bacterium 2_2_44A genomic scaffold supercont1.3, whole genome shotgun sequence. [Erysipelotrichaceae bacterium 2_2_44A]	622692	330024	353201		Listeria_phage(15.0%)	39	NA	NA
Erysipelotrichaceae_bacterium_2_2_44A	JH126433	JH126433 Erysipelotrichaceae bacterium 2_2_44A genomic scaffold supercont1.3, whole genome shotgun sequence. [Erysipelotrichaceae bacterium 2_2_44A]	622692	541701	549672	tRNA	Streptococcus_phage(33.33%)	7	NA	NA
Erysipelotrichaceae_bacterium_2_2_44A	JH126431	JH126431 Erysipelotrichaceae bacterium 2_2_44A genomic scaffold supercont1.1, whole genome shotgun sequence. [Erysipelotrichaceae bacterium 2_2_44A]	1819523	1269263	1290250		Clostridium_phage(28.57%)	25	NA	NA
Bacteroides_ovatus_SD_CMC_3f	ADMO01000088	ADMO01000088 Bacteroides ovatus SD CMC 3f contig00094, whole genome shotgun sequence. [Bacteroides ovatus SD CMC 3f]	126697	46334	53165		Bacillus_phage(28.57%)	8	NA	NA
Bacteroides_ovatus_SD_CMC_3f	ADMO01000108	ADMO01000108 Bacteroides ovatus SD CMC 3f contig00052, whole genome shotgun sequence. [Bacteroides ovatus SD CMC 3f]	28975	8278	16668		Campylobacter_phage(33.33%)	11	NA	NA
Bacteroides_ovatus_SD_CMC_3f	ADMO01000126	ADMO01000126 Bacteroides ovatus SD CMC 3f contig00128, whole genome shotgun sequence. [Bacteroides ovatus SD CMC 3f]	163779	422	8272		Lactobacillus_phage(16.67%)	10	NA	NA
Bacteroides_ovatus_SD_CMC_3f	ADMO01000126	ADMO01000126 Bacteroides ovatus SD CMC 3f contig00128, whole genome shotgun sequence. [Bacteroides ovatus SD CMC 3f]	163779	13560	25092		Clostridium_phage(12.5%)	16	NA	NA
Bacteroides_ovatus_SD_CMC_3f	ADMO01000113	ADMO01000113 Bacteroides ovatus SD CMC 3f contig00054, whole genome shotgun sequence. [Bacteroides ovatus SD CMC 3f]	271687	225122	230159		Pseudomonas_phage(16.67%)	7	NA	NA
Lachnospiraceae_bacterium_1_4_56FAA	GL945163	GL945163 Lachnospiraceae bacterium 1_4_56FAA genomic scaffold supercont1.1, whole genome shotgun sequence. [Lachnospiraceae bacterium 1_4_56FAA]	609792	96844	104992		Streptococcus_phage(60.0%)	11	NA	NA
Lachnospiraceae_bacterium_1_4_56FAA	GL945163	GL945163 Lachnospiraceae bacterium 1_4_56FAA genomic scaffold supercont1.1, whole genome shotgun sequence. [Lachnospiraceae bacterium 1_4_56FAA]	609792	518630	560352	protease	Streptococcus_phage(34.29%)	51	NA	NA
Lachnospiraceae_bacterium_1_4_56FAA	GL945167	GL945167 Lachnospiraceae bacterium 1_4_56FAA genomic scaffold supercont1.5, whole genome shotgun sequence. [Lachnospiraceae bacterium 1_4_56FAA]	284554	105166	116441		Streptococcus_phage(25.0%)	9	NA	NA
Lachnospiraceae_bacterium_1_4_56FAA	GL945169	GL945169 Lachnospiraceae bacterium 1_4_56FAA genomic scaffold supercont1.7, whole genome shotgun sequence. [Lachnospiraceae bacterium 1_4_56FAA]	226850	31506	39368		Escherichia_phage(25.0%)	9	NA	NA
Lachnospiraceae_bacterium_1_4_56FAA	GL945169	GL945169 Lachnospiraceae bacterium 1_4_56FAA genomic scaffold supercont1.7, whole genome shotgun sequence. [Lachnospiraceae bacterium 1_4_56FAA]	226850	43507	52084		uncultured_Caudovirales_phage(33.33%)	15	NA	NA
Lachnospiraceae_bacterium_1_4_56FAA	GL945169	GL945169 Lachnospiraceae bacterium 1_4_56FAA genomic scaffold supercont1.7, whole genome shotgun sequence. [Lachnospiraceae bacterium 1_4_56FAA]	226850	152638	160254		Halovirus(16.67%)	6	NA	NA
Lachnospiraceae_bacterium_1_4_56FAA	GL945166	GL945166 Lachnospiraceae bacterium 1_4_56FAA genomic scaffold supercont1.4, whole genome shotgun sequence. [Lachnospiraceae bacterium 1_4_56FAA]	412740	139112	148795	protease	Streptococcus_phage(33.33%)	7	NA	NA
Lachnospiraceae_bacterium_1_4_56FAA	GL945166	GL945166 Lachnospiraceae bacterium 1_4_56FAA genomic scaffold supercont1.4, whole genome shotgun sequence. [Lachnospiraceae bacterium 1_4_56FAA]	412740	160856	171533		Enterobacteria_phage(28.57%)	11	NA	NA
Lachnospiraceae_bacterium_1_4_56FAA	GL945166	GL945166 Lachnospiraceae bacterium 1_4_56FAA genomic scaffold supercont1.4, whole genome shotgun sequence. [Lachnospiraceae bacterium 1_4_56FAA]	412740	370619	379758	transposase	Bacillus_phage(33.33%)	10	NA	NA
Lachnospiraceae_bacterium_1_4_56FAA	GL945164	GL945164 Lachnospiraceae bacterium 1_4_56FAA genomic scaffold supercont1.2, whole genome shotgun sequence. [Lachnospiraceae bacterium 1_4_56FAA]	505769	252979	260726		uncultured_Caudovirales_phage(57.14%)	15	NA	NA
Bacteroides_sp._1_1_30	GL945101	GL945101 Bacteroides sp. 1_1_30 genomic scaffold supercont1.12, whole genome shotgun sequence. [Bacteroides sp. 1_1_30]	224626	42502	47545		Sinorhizobium_phage(16.67%)	6	NA	NA
Bacteroides_sp._1_1_30	GL945101	GL945101 Bacteroides sp. 1_1_30 genomic scaffold supercont1.12, whole genome shotgun sequence. [Bacteroides sp. 1_1_30]	224626	198683	209343		Enterobacteria_phage(16.67%)	8	NA	NA
Bacteroides_sp._1_1_30	GL945090	GL945090 Bacteroides sp. 1_1_30 genomic scaffold supercont1.1, whole genome shotgun sequence. [Bacteroides sp. 1_1_30]	889073	125277	138671		unidentified_phage(85.71%)	12	NA	NA
Bacteroides_sp._1_1_30	GL945094	GL945094 Bacteroides sp. 1_1_30 genomic scaffold supercont1.5, whole genome shotgun sequence. [Bacteroides sp. 1_1_30]	440094	191561	198166		unidentified_phage(33.33%)	9	NA	NA
Escherichia_sp._4_1_40B	JH660539	JH660539 Escherichia sp. 4_1_40B genomic scaffold supercont2.1, whole genome shotgun sequence. [Escherichia sp. 4_1_40B]	691058	139968	257897	integrase,transposase,tRNA,protease	Escherichia_phage(11.43%)	107	NA	NA
Escherichia_sp._4_1_40B	JH660540	JH660540 Escherichia sp. 4_1_40B genomic scaffold supercont2.2, whole genome shotgun sequence. [Escherichia sp. 4_1_40B]	662850	39090	56880	transposase	Shigella_phage(50.0%)	23	NA	NA
Escherichia_sp._4_1_40B	JH660540	JH660540 Escherichia sp. 4_1_40B genomic scaffold supercont2.2, whole genome shotgun sequence. [Escherichia sp. 4_1_40B]	662850	323936	339864		Enterobacteria_phage(39.13%)	24	NA	NA
Escherichia_sp._4_1_40B	JH660540	JH660540 Escherichia sp. 4_1_40B genomic scaffold supercont2.2, whole genome shotgun sequence. [Escherichia sp. 4_1_40B]	662850	642910	651015		Salmonella_phage(81.82%)	13	NA	NA
Escherichia_sp._4_1_40B	JH660540	JH660540 Escherichia sp. 4_1_40B genomic scaffold supercont2.2, whole genome shotgun sequence. [Escherichia sp. 4_1_40B]	662850	655300	662666	tail	Salmonella_phage(77.78%)	10	NA	NA
Escherichia_sp._4_1_40B	JH660541	JH660541 Escherichia sp. 4_1_40B genomic scaffold supercont2.3, whole genome shotgun sequence. [Escherichia sp. 4_1_40B]	2711194	30	7672		Salmonella_phage(57.14%)	10	NA	NA
Escherichia_sp._4_1_40B	JH660541	JH660541 Escherichia sp. 4_1_40B genomic scaffold supercont2.3, whole genome shotgun sequence. [Escherichia sp. 4_1_40B]	2711194	39831	66344	integrase,transposase,protease	Stx2-converting_phage(31.25%)	22	40804:40818	75128:75142
Escherichia_sp._4_1_40B	JH660541	JH660541 Escherichia sp. 4_1_40B genomic scaffold supercont2.3, whole genome shotgun sequence. [Escherichia sp. 4_1_40B]	2711194	495680	505055	transposase	Enterobacteria_phage(22.22%)	13	NA	NA
Escherichia_sp._4_1_40B	JH660541	JH660541 Escherichia sp. 4_1_40B genomic scaffold supercont2.3, whole genome shotgun sequence. [Escherichia sp. 4_1_40B]	2711194	508256	520400	tail	Escherichia_phage(38.46%)	14	NA	NA
Escherichia_sp._4_1_40B	JH660541	JH660541 Escherichia sp. 4_1_40B genomic scaffold supercont2.3, whole genome shotgun sequence. [Escherichia sp. 4_1_40B]	2711194	798009	814330	transposase,tail	Enterobacteria_phage(50.0%)	20	NA	NA
Escherichia_sp._4_1_40B	JH660541	JH660541 Escherichia sp. 4_1_40B genomic scaffold supercont2.3, whole genome shotgun sequence. [Escherichia sp. 4_1_40B]	2711194	1283086	1290442	tail	Shigella_phage(42.86%)	10	NA	NA
Escherichia_sp._4_1_40B	JH660541	JH660541 Escherichia sp. 4_1_40B genomic scaffold supercont2.3, whole genome shotgun sequence. [Escherichia sp. 4_1_40B]	2711194	1417122	1425434		Enterobacteria_phage(83.33%)	9	NA	NA
Escherichia_sp._4_1_40B	JH660541	JH660541 Escherichia sp. 4_1_40B genomic scaffold supercont2.3, whole genome shotgun sequence. [Escherichia sp. 4_1_40B]	2711194	1671831	1690770	integrase	Enterobacteria_phage(63.33%)	31	1669806:1669822	1694445:1694461
Escherichia_sp._4_1_40B	JH660541	JH660541 Escherichia sp. 4_1_40B genomic scaffold supercont2.3, whole genome shotgun sequence. [Escherichia sp. 4_1_40B]	2711194	2058131	2071314		Escherichia_phage(50.0%)	12	NA	NA
Escherichia_sp._4_1_40B	JH660546	JH660546 Escherichia sp. 4_1_40B genomic scaffold supercont2.8, whole genome shotgun sequence. [Escherichia sp. 4_1_40B]	80575	65	49892	transposase,protease	Escherichia_phage(15.0%)	60	NA	NA
Escherichia_sp._4_1_40B	JH660546	JH660546 Escherichia sp. 4_1_40B genomic scaffold supercont2.8, whole genome shotgun sequence. [Escherichia sp. 4_1_40B]	80575	65924	74547	transposase	Escherichia_phage(44.44%)	13	NA	NA
Bacteroides_dorei_DSM_17855	DS995536	DS995536 Bacteroides dorei DSM 17855 Scfld8 genomic scaffold, whole genome shotgun sequence. [Bacteroides dorei DSM 17855]	421830	104715	113270		uncultured_Mediterranean_phage(16.67%)	8	NA	NA
Bacteroides_vulgatus_PC510	ADKO01000106	ADKO01000106 Bacteroides vulgatus PC510 contig00009, whole genome shotgun sequence. [Bacteroides vulgatus PC510]	119956	13107	21663		Microcystis_phage(16.67%)	8	NA	NA
Bacteroides_vulgatus_PC510	ADKO01000113	ADKO01000113 Bacteroides vulgatus PC510 contig00037, whole genome shotgun sequence. [Bacteroides vulgatus PC510]	133112	87900	99769		Cellulophaga_phage(22.22%)	19	NA	NA
Lactobacillus_sp._7_1_47FAA	JH164952	JH164952 Lactobacillus sp. 7_1_47FAA genomic scaffold supercont1.1, whole genome shotgun sequence. [Lactobacillus sp. 7_1_47FAA]	801884	6192	14490		Yellowstone_lake_phycodnavirus(16.67%)	7	NA	NA
Lactobacillus_sp._7_1_47FAA	JH164952	JH164952 Lactobacillus sp. 7_1_47FAA genomic scaffold supercont1.1, whole genome shotgun sequence. [Lactobacillus sp. 7_1_47FAA]	801884	72542	86177	tRNA,protease	unidentified_phage(12.5%)	13	NA	NA
Lactobacillus_sp._7_1_47FAA	JH164952	JH164952 Lactobacillus sp. 7_1_47FAA genomic scaffold supercont1.1, whole genome shotgun sequence. [Lactobacillus sp. 7_1_47FAA]	801884	437229	448205		Bacillus_virus(28.57%)	8	NA	NA
Lactobacillus_sp._7_1_47FAA	JH164952	JH164952 Lactobacillus sp. 7_1_47FAA genomic scaffold supercont1.1, whole genome shotgun sequence. [Lactobacillus sp. 7_1_47FAA]	801884	481054	494049	protease	Streptococcus_phage(37.5%)	9	NA	NA
Bifidobacterium_catenulatum_DSM_16992_=_JCM_1194_=_LMG_11043	ABXY01000017	ABXY01000017 Bifidobacterium catenulatum DSM 16992 = JCM 1194 = LMG 11043 strain DSM 16992 B_catenulatum-1.0_Cont34.1, whole genome shotgun sequence. [Bifidobacterium catenulatum DSM 16992 = JCM 1194 = LMG 11043]	127198	95759	104130		Staphylococcus_phage(33.33%)	8	NA	NA
Bifidobacterium_catenulatum_DSM_16992_=_JCM_1194_=_LMG_11043	ABXY01000004	ABXY01000004 Bifidobacterium catenulatum DSM 16992 = JCM 1194 = LMG 11043 strain DSM 16992 B_catenulatum-1.0_Cont6.1, whole genome shotgun sequence. [Bifidobacterium catenulatum DSM 16992 = JCM 1194 = LMG 11043]	54010	44173	52322		Arthrobacter_phage(33.33%)	9	NA	NA
Bifidobacterium_catenulatum_DSM_16992_=_JCM_1194_=_LMG_11043	ABXY01000011	ABXY01000011 Bifidobacterium catenulatum DSM 16992 = JCM 1194 = LMG 11043 strain DSM 16992 B_catenulatum-1.0_Cont18.1, whole genome shotgun sequence. [Bifidobacterium catenulatum DSM 16992 = JCM 1194 = LMG 11043]	702384	74408	84151		Leptospira_phage(16.67%)	8	NA	NA
Bifidobacterium_catenulatum_DSM_16992_=_JCM_1194_=_LMG_11043	ABXY01000011	ABXY01000011 Bifidobacterium catenulatum DSM 16992 = JCM 1194 = LMG 11043 strain DSM 16992 B_catenulatum-1.0_Cont18.1, whole genome shotgun sequence. [Bifidobacterium catenulatum DSM 16992 = JCM 1194 = LMG 11043]	702384	464608	479596		Propionibacterium_phage(30.0%)	16	NA	NA
Bifidobacterium_catenulatum_DSM_16992_=_JCM_1194_=_LMG_11043	ABXY01000011	ABXY01000011 Bifidobacterium catenulatum DSM 16992 = JCM 1194 = LMG 11043 strain DSM 16992 B_catenulatum-1.0_Cont18.1, whole genome shotgun sequence. [Bifidobacterium catenulatum DSM 16992 = JCM 1194 = LMG 11043]	702384	482904	488735		Bifidobacterium_phage(85.71%)	11	NA	NA
Faecalibacterium_prausnitzii_L2-6	FP929045	FP929045 Faecalibacterium prausnitzii L2/6 draft genome. [Faecalibacterium prausnitzii L2-6]	3321367	33902	74593		Faecalibacterium_phage(96.3%)	62	NA	NA
Faecalibacterium_prausnitzii_L2-6	FP929045	FP929045 Faecalibacterium prausnitzii L2/6 draft genome. [Faecalibacterium prausnitzii L2-6]	3321367	102683	111131	tRNA	Prochlorococcus_phage(33.33%)	8	NA	NA
Faecalibacterium_prausnitzii_L2-6	FP929045	FP929045 Faecalibacterium prausnitzii L2/6 draft genome. [Faecalibacterium prausnitzii L2-6]	3321367	634437	666284	tRNA	Faecalibacterium_phage(65.52%)	46	NA	NA
Faecalibacterium_prausnitzii_L2-6	FP929045	FP929045 Faecalibacterium prausnitzii L2/6 draft genome. [Faecalibacterium prausnitzii L2-6]	3321367	1625771	1677177	protease	Faecalibacterium_phage(91.55%)	76	NA	NA
Faecalibacterium_prausnitzii_L2-6	FP929045	FP929045 Faecalibacterium prausnitzii L2/6 draft genome. [Faecalibacterium prausnitzii L2-6]	3321367	2403646	2412018	tRNA	Staphylococcus_phage(66.67%)	8	NA	NA
Streptococcus_equinus_ATCC_9812	GL698429	GL698429 Streptococcus equinus ATCC 9812 genomic scaffold SCAFFOLD1, whole genome shotgun sequence. [Streptococcus equinus ATCC 9812]	1382815	132147	142113		Staphylococcus_phage(50.0%)	10	NA	NA
Streptococcus_equinus_ATCC_9812	GL698429	GL698429 Streptococcus equinus ATCC 9812 genomic scaffold SCAFFOLD1, whole genome shotgun sequence. [Streptococcus equinus ATCC 9812]	1382815	476078	485363		Streptococcus_phage(75.0%)	12	NA	NA
Streptococcus_equinus_ATCC_9812	GL698429	GL698429 Streptococcus equinus ATCC 9812 genomic scaffold SCAFFOLD1, whole genome shotgun sequence. [Streptococcus equinus ATCC 9812]	1382815	627675	639961		Bacillus_phage(33.33%)	13	NA	NA
Streptococcus_equinus_ATCC_9812	GL698429	GL698429 Streptococcus equinus ATCC 9812 genomic scaffold SCAFFOLD1, whole genome shotgun sequence. [Streptococcus equinus ATCC 9812]	1382815	975729	985468		Streptococcus_phage(75.0%)	12	NA	NA
Streptococcus_equinus_ATCC_9812	GL698429	GL698429 Streptococcus equinus ATCC 9812 genomic scaffold SCAFFOLD1, whole genome shotgun sequence. [Streptococcus equinus ATCC 9812]	1382815	1341504	1349627		Staphylococcus_phage(16.67%)	9	NA	NA
Streptococcus_equinus_ATCC_9812	GL698431	GL698431 Streptococcus equinus ATCC 9812 genomic scaffold SCAFFOLD3, whole genome shotgun sequence. [Streptococcus equinus ATCC 9812]	111646	168	7078	transposase	Streptococcus_phage(50.0%)	9	NA	NA
Streptococcus_equinus_ATCC_9812	GL698431	GL698431 Streptococcus equinus ATCC 9812 genomic scaffold SCAFFOLD3, whole genome shotgun sequence. [Streptococcus equinus ATCC 9812]	111646	28937	38243		Bacillus_virus(50.0%)	9	NA	NA
Bacteroides_sp._3_1_40A	GL635657	GL635657 Bacteroides sp. 3_1_40A genomic scaffold supercont1.5, whole genome shotgun sequence. [Bacteroides sp. 3_1_40A]	367383	51396	62454		Vibrio_phage(20.0%)	14	NA	NA
Bacteroides_sp._3_1_40A	GL635670	GL635670 Bacteroides sp. 3_1_40A genomic scaffold supercont1.18, whole genome shotgun sequence. [Bacteroides sp. 3_1_40A]	35839	21285	29706		Microcystis_phage(16.67%)	8	NA	NA
Parvimonas_micra_ATCC_33270	DS483508	DS483508 Parvimonas micra ATCC 33270 Scfld_02_4 genomic scaffold, whole genome shotgun sequence. [Parvimonas micra ATCC 33270]	2853	8	2509		Bacillus_phage(66.67%)	7	NA	NA
Parvimonas_micra_ATCC_33270	DS483517	DS483517 Parvimonas micra ATCC 33270 Scfld_02_13 genomic scaffold, whole genome shotgun sequence. [Parvimonas micra ATCC 33270]	505805	254012	283286		Clostridium_phage(14.29%)	47	NA	NA
Parvimonas_micra_ATCC_33270	DS483512	DS483512 Parvimonas micra ATCC 33270 Scfld_02_8 genomic scaffold, whole genome shotgun sequence. [Parvimonas micra ATCC 33270]	5084	268	4858		Listeria_phage(16.67%)	10	NA	NA
Parvimonas_micra_ATCC_33270	DS483518	DS483518 Parvimonas micra ATCC 33270 Scfld_02_14 genomic scaffold, whole genome shotgun sequence. [Parvimonas micra ATCC 33270]	725933	551589	566146		Synechococcus_phage(22.22%)	12	NA	NA
Bifidobacterium_longum_subsp._infantis_CCUG_52486	DS990241	DS990241 Bifidobacterium longum subsp. infantis CCUG 52486 supercont2.4 genomic scaffold, whole genome shotgun sequence. [Bifidobacterium longum subsp. infantis CCUG 52486]	380898	312326	325880		Propionibacterium_phage(38.46%)	17	NA	NA
Bifidobacterium_longum_subsp._infantis_CCUG_52486	DS990241	DS990241 Bifidobacterium longum subsp. infantis CCUG 52486 supercont2.4 genomic scaffold, whole genome shotgun sequence. [Bifidobacterium longum subsp. infantis CCUG 52486]	380898	370833	379129		Erysipelothrix_phage(50.0%)	11	NA	NA
Bifidobacterium_longum_subsp._infantis_CCUG_52486	DS990239	DS990239 Bifidobacterium longum subsp. infantis CCUG 52486 supercont2.2 genomic scaffold, whole genome shotgun sequence. [Bifidobacterium longum subsp. infantis CCUG 52486]	476126	10825	32016		Bifidobacterium_phage(27.78%)	39	NA	NA
Bifidobacterium_longum_subsp._infantis_CCUG_52486	DS990238	DS990238 Bifidobacterium longum subsp. infantis CCUG 52486 supercont2.1 genomic scaffold, whole genome shotgun sequence. [Bifidobacterium longum subsp. infantis CCUG 52486]	859734	435548	445039		Gordonia_phage(42.86%)	12	NA	NA
Bifidobacterium_longum_subsp._infantis_CCUG_52486	DS990238	DS990238 Bifidobacterium longum subsp. infantis CCUG 52486 supercont2.1 genomic scaffold, whole genome shotgun sequence. [Bifidobacterium longum subsp. infantis CCUG 52486]	859734	810289	818589		Mycobacterium_phage(33.33%)	8	NA	NA
Helicobacter_pylori_GAM244Ai	KB636707	KB636707 Helicobacter pylori GAM244Ai genomic scaffold Scfld276, whole genome shotgun sequence. [Helicobacter pylori GAM244Ai]	99247	27469	38384		uncultured_virus(16.67%)	9	NA	NA
Helicobacter_pylori_GAM244Ai	KB636687	KB636687 Helicobacter pylori GAM244Ai genomic scaffold Scfld18, whole genome shotgun sequence. [Helicobacter pylori GAM244Ai]	5416	738	5374		Escherichia_phage(100.0%)	7	NA	NA
Coprobacillus_sp._29_1	GL636580	GL636580 Coprobacillus sp. 29_1 genomic scaffold supercont1.4, whole genome shotgun sequence. [Coprobacillus sp. 29_1]	537303	248147	257024		Mollivirus(14.29%)	11	NA	NA
Coprobacillus_sp._29_1	GL636580	GL636580 Coprobacillus sp. 29_1 genomic scaffold supercont1.4, whole genome shotgun sequence. [Coprobacillus sp. 29_1]	537303	523485	535475	tRNA	Enterococcus_phage(12.5%)	13	NA	NA
Coprobacillus_sp._29_1	GL636578	GL636578 Coprobacillus sp. 29_1 genomic scaffold supercont1.2, whole genome shotgun sequence. [Coprobacillus sp. 29_1]	846199	40236	50076		Prochlorococcus_phage(50.0%)	8	NA	NA
Coprobacillus_sp._29_1	GL636578	GL636578 Coprobacillus sp. 29_1 genomic scaffold supercont1.2, whole genome shotgun sequence. [Coprobacillus sp. 29_1]	846199	405248	418795		Oenococcus_phage(22.22%)	13	NA	NA
Coprobacillus_sp._29_1	GL636583	GL636583 Coprobacillus sp. 29_1 genomic scaffold supercont1.7, whole genome shotgun sequence. [Coprobacillus sp. 29_1]	133685	62424	71308		uncultured_Mediterranean_phage(33.33%)	9	NA	NA
Coprobacillus_sp._29_1	GL636579	GL636579 Coprobacillus sp. 29_1 genomic scaffold supercont1.3, whole genome shotgun sequence. [Coprobacillus sp. 29_1]	622425	11296	20143		Streptococcus_phage(87.5%)	13	NA	NA
Coprobacillus_sp._29_1	GL636577	GL636577 Coprobacillus sp. 29_1 genomic scaffold supercont1.1, whole genome shotgun sequence. [Coprobacillus sp. 29_1]	953248	425098	434726		Staphylococcus_phage(57.14%)	9	NA	NA
Coprobacillus_sp._29_1	GL636577	GL636577 Coprobacillus sp. 29_1 genomic scaffold supercont1.1, whole genome shotgun sequence. [Coprobacillus sp. 29_1]	953248	439965	449036		Streptococcus_phage(16.67%)	10	NA	NA
Coprobacillus_sp._29_1	GL636577	GL636577 Coprobacillus sp. 29_1 genomic scaffold supercont1.1, whole genome shotgun sequence. [Coprobacillus sp. 29_1]	953248	536207	556299		Streptococcus_phage(100.0%)	26	NA	NA
Lactobacillus_amylolyticus_DSM_11664	ADNY01000035	ADNY01000035 Lactobacillus amylolyticus DSM 11664 contig00050, whole genome shotgun sequence. [Lactobacillus amylolyticus DSM 11664]	40683	2639	12280		Lactobacillus_virus(33.33%)	8	NA	NA
Ruminiclostridium_Clostridium_leptum_DSM_753	DS480346	DS480346 Clostridium leptum DSM 753 Scfld_02_15 genomic scaffold, whole genome shotgun sequence. [Ruminiclostridium [Clostridium] leptum DSM 753]	222869	119020	133846		Faecalibacterium_phage(42.86%)	21	NA	NA
Ruminiclostridium_Clostridium_leptum_DSM_753	DS480346	DS480346 Clostridium leptum DSM 753 Scfld_02_15 genomic scaffold, whole genome shotgun sequence. [Ruminiclostridium [Clostridium] leptum DSM 753]	222869	142154	167383		Faecalibacterium_phage(21.74%)	26	NA	NA
Ruminiclostridium_Clostridium_leptum_DSM_753	DS480347	DS480347 Clostridium leptum DSM 753 Scfld_02_16 genomic scaffold, whole genome shotgun sequence. [Ruminiclostridium [Clostridium] leptum DSM 753]	452649	217612	226573		Mannheimia_phage(11.11%)	17	NA	NA
Ruminiclostridium_Clostridium_leptum_DSM_753	DS480347	DS480347 Clostridium leptum DSM 753 Scfld_02_16 genomic scaffold, whole genome shotgun sequence. [Ruminiclostridium [Clostridium] leptum DSM 753]	452649	420344	431813		uncultured_virus(22.22%)	12	NA	NA
Ruminiclostridium_Clostridium_leptum_DSM_753	DS480348	DS480348 Clostridium leptum DSM 753 Scfld_02_17 genomic scaffold, whole genome shotgun sequence. [Ruminiclostridium [Clostridium] leptum DSM 753]	498680	459223	468036	tRNA	Bacillus_phage(33.33%)	7	NA	NA
Ruminiclostridium_Clostridium_leptum_DSM_753	DS480350	DS480350 Clostridium leptum DSM 753 Scfld_02_19 genomic scaffold, whole genome shotgun sequence. [Ruminiclostridium [Clostridium] leptum DSM 753]	523705	132325	138215		Streptococcus_phage(50.0%)	8	NA	NA
Ruminiclostridium_Clostridium_leptum_DSM_753	DS480350	DS480350 Clostridium leptum DSM 753 Scfld_02_19 genomic scaffold, whole genome shotgun sequence. [Ruminiclostridium [Clostridium] leptum DSM 753]	523705	178223	187618		Acinetobacter_phage(14.29%)	11	NA	NA
Ruminiclostridium_Clostridium_leptum_DSM_753	DS480350	DS480350 Clostridium leptum DSM 753 Scfld_02_19 genomic scaffold, whole genome shotgun sequence. [Ruminiclostridium [Clostridium] leptum DSM 753]	523705	462197	471609		Escherichia_phage(28.57%)	8	NA	NA
Ruminiclostridium_Clostridium_leptum_DSM_753	DS480349	DS480349 Clostridium leptum DSM 753 Scfld_02_18 genomic scaffold, whole genome shotgun sequence. [Ruminiclostridium [Clostridium] leptum DSM 753]	564969	466282	480687	integrase	Clostridium_phage(10.0%)	12	457999:458012	468055:468068
Dialister_succinatiphilus_YIT_11850	JH591187	JH591187 Dialister succinatiphilus YIT 11850 genomic scaffold supercont1.1, whole genome shotgun sequence. [Dialister succinatiphilus YIT 11850]	1256220	675535	690600	protease	Clostridium_phage(20.0%)	20	NA	NA
Dialister_succinatiphilus_YIT_11850	JH591187	JH591187 Dialister succinatiphilus YIT 11850 genomic scaffold supercont1.1, whole genome shotgun sequence. [Dialister succinatiphilus YIT 11850]	1256220	999331	1006730	tRNA	Staphylococcus_phage(50.0%)	7	NA	NA
Dialister_succinatiphilus_YIT_11850	JH591188	JH591188 Dialister succinatiphilus YIT 11850 genomic scaffold supercont1.2, whole genome shotgun sequence. [Dialister succinatiphilus YIT 11850]	762448	746794	753038		Mollivirus(33.33%)	6	NA	NA
Lactobacillus_reuteri_CF48-3A	GG693666	GG693666 Lactobacillus reuteri CF48-3A genomic scaffold SCAFFOLD3, whole genome shotgun sequence. [Lactobacillus reuteri CF48-3A]	186205	124800	133969	tRNA	Streptococcus_phage(33.33%)	10	NA	NA
Lactobacillus_reuteri_CF48-3A	GG693667	GG693667 Lactobacillus reuteri CF48-3A genomic scaffold SCAFFOLD4, whole genome shotgun sequence. [Lactobacillus reuteri CF48-3A]	134665	15123	22226		Enterobacteria_phage(50.0%)	6	NA	NA
Lactobacillus_reuteri_CF48-3A	GG693669	GG693669 Lactobacillus reuteri CF48-3A genomic scaffold SCAFFOLD6, whole genome shotgun sequence. [Lactobacillus reuteri CF48-3A]	91571	42614	50759		Lactobacillus_phage(77.78%)	15	NA	NA
Lactobacillus_reuteri_CF48-3A	GG693669	GG693669 Lactobacillus reuteri CF48-3A genomic scaffold SCAFFOLD6, whole genome shotgun sequence. [Lactobacillus reuteri CF48-3A]	91571	55297	80894		Lactobacillus_phage(95.45%)	31	NA	NA
Lactobacillus_reuteri_CF48-3A	GG693701	GG693701 Lactobacillus reuteri CF48-3A genomic scaffold SCAFFOLD38, whole genome shotgun sequence. [Lactobacillus reuteri CF48-3A]	48517	835	16359	protease	Erysipelothrix_phage(91.67%)	21	NA	NA
Lactobacillus_reuteri_CF48-3A	GG693675	GG693675 Lactobacillus reuteri CF48-3A genomic scaffold SCAFFOLD12, whole genome shotgun sequence. [Lactobacillus reuteri CF48-3A]	46380	37630	45423		Erysipelothrix_phage(50.0%)	10	NA	NA
Lactobacillus_reuteri_CF48-3A	GG693689	GG693689 Lactobacillus reuteri CF48-3A genomic scaffold SCAFFOLD26, whole genome shotgun sequence. [Lactobacillus reuteri CF48-3A]	25123	7231	15686		Synechococcus_phage(33.33%)	8	NA	NA
Lactobacillus_reuteri_CF48-3A	GG693680	GG693680 Lactobacillus reuteri CF48-3A genomic scaffold SCAFFOLD17, whole genome shotgun sequence. [Lactobacillus reuteri CF48-3A]	39074	836	16069	protease	Erysipelothrix_phage(66.67%)	18	NA	NA
Helicobacter_pylori_GAM231Ai	KB641700	KB641700 Helicobacter pylori GAM231Ai genomic scaffold Scfld27, whole genome shotgun sequence. [Helicobacter pylori GAM231Ai]	76963	38509	49445		Bacillus_phage(16.67%)	9	NA	NA
Helicobacter_pylori_GAM231Ai	KB641708	KB641708 Helicobacter pylori GAM231Ai genomic scaffold Scfld50, whole genome shotgun sequence. [Helicobacter pylori GAM231Ai]	5418	72	4708		Escherichia_phage(100.0%)	7	NA	NA
Fusobacterium_periodonticum_1_1_41FAA	GG770381	GG770381 Fusobacterium sp. 1_1_41FAA genomic scaffold supercont1.8, whole genome shotgun sequence. [Fusobacterium periodonticum 1_1_41FAA]	992199	159131	180153		Bacillus_phage(21.05%)	38	NA	NA
Fusobacterium_periodonticum_1_1_41FAA	GG770381	GG770381 Fusobacterium sp. 1_1_41FAA genomic scaffold supercont1.8, whole genome shotgun sequence. [Fusobacterium periodonticum 1_1_41FAA]	992199	183548	197747		Fusobacterium_phage(41.67%)	23	NA	NA
Fusobacterium_periodonticum_1_1_41FAA	GG770381	GG770381 Fusobacterium sp. 1_1_41FAA genomic scaffold supercont1.8, whole genome shotgun sequence. [Fusobacterium periodonticum 1_1_41FAA]	992199	352517	362076		Synechococcus_phage(28.57%)	7	NA	NA
Fusobacterium_periodonticum_1_1_41FAA	GG770383	GG770383 Fusobacterium sp. 1_1_41FAA genomic scaffold supercont1.10, whole genome shotgun sequence. [Fusobacterium periodonticum 1_1_41FAA]	852333	250275	261951		Fusobacterium_phage(55.56%)	15	NA	NA
Fusobacterium_periodonticum_1_1_41FAA	GG770383	GG770383 Fusobacterium sp. 1_1_41FAA genomic scaffold supercont1.10, whole genome shotgun sequence. [Fusobacterium periodonticum 1_1_41FAA]	852333	267843	296808	protease	Fusobacterium_phage(65.38%)	50	NA	NA
Fusobacterium_periodonticum_1_1_41FAA	GG770383	GG770383 Fusobacterium sp. 1_1_41FAA genomic scaffold supercont1.10, whole genome shotgun sequence. [Fusobacterium periodonticum 1_1_41FAA]	852333	397450	406881		Planktothrix_phage(33.33%)	9	NA	NA
Fusobacterium_periodonticum_1_1_41FAA	GG770383	GG770383 Fusobacterium sp. 1_1_41FAA genomic scaffold supercont1.10, whole genome shotgun sequence. [Fusobacterium periodonticum 1_1_41FAA]	852333	578483	599050	protease	Clostridium_phage(58.82%)	29	NA	NA
Clostridium_sp._SS2_1	DS547027	DS547027 Clostridium sp. SS2/1 Scfld_03_31 genomic scaffold, whole genome shotgun sequence. [Clostridium sp. SS2/1]	165641	15055	38558	transposase	Streptococcus_phage(83.33%)	30	NA	NA
Clostridium_sp._SS2_1	DS547028	DS547028 Clostridium sp. SS2/1 Scfld_03_32 genomic scaffold, whole genome shotgun sequence. [Clostridium sp. SS2/1]	208292	36867	49143		unidentified_phage(30.77%)	20	NA	NA
Clostridium_sp._SS2_1	DS547028	DS547028 Clostridium sp. SS2/1 Scfld_03_32 genomic scaffold, whole genome shotgun sequence. [Clostridium sp. SS2/1]	208292	53119	60384		Clostridium_phage(33.33%)	9	NA	NA
Clostridium_sp._SS2_1	DS547028	DS547028 Clostridium sp. SS2/1 Scfld_03_32 genomic scaffold, whole genome shotgun sequence. [Clostridium sp. SS2/1]	208292	68665	81595		Bacillus_phage(44.44%)	14	NA	NA
Clostridium_sp._SS2_1	DS547024	DS547024 Clostridium sp. SS2/1 Scfld_03_28 genomic scaffold, whole genome shotgun sequence. [Clostridium sp. SS2/1]	158071	33410	47031		Streptococcus_phage(100.0%)	16	NA	NA
Clostridium_sp._SS2_1	DS547024	DS547024 Clostridium sp. SS2/1 Scfld_03_28 genomic scaffold, whole genome shotgun sequence. [Clostridium sp. SS2/1]	158071	61611	75896		Streptococcus_phage(100.0%)	17	NA	NA
Clostridium_sp._SS2_1	DS547024	DS547024 Clostridium sp. SS2/1 Scfld_03_28 genomic scaffold, whole genome shotgun sequence. [Clostridium sp. SS2/1]	158071	89652	97614		Clostridium_phage(33.33%)	9	NA	NA
Clostridium_sp._SS2_1	DS547001	DS547001 Clostridium sp. SS2/1 Scfld_03_5 genomic scaffold, whole genome shotgun sequence. [Clostridium sp. SS2/1]	489539	76536	103635		Faecalibacterium_phage(35.0%)	30	NA	NA
Clostridium_sp._SS2_1	DS547001	DS547001 Clostridium sp. SS2/1 Scfld_03_5 genomic scaffold, whole genome shotgun sequence. [Clostridium sp. SS2/1]	489539	107939	121588		Faecalibacterium_phage(50.0%)	19	NA	NA
Clostridium_sp._SS2_1	DS547029	DS547029 Clostridium sp. SS2/1 Scfld_03_33 genomic scaffold, whole genome shotgun sequence. [Clostridium sp. SS2/1]	587063	169410	188438		Streptococcus_phage(80.0%)	25	NA	NA
Clostridium_sp._SS2_1	DS547029	DS547029 Clostridium sp. SS2/1 Scfld_03_33 genomic scaffold, whole genome shotgun sequence. [Clostridium sp. SS2/1]	587063	510285	518443		Staphylococcus_phage(50.0%)	8	NA	NA
Anaerostipes_caccae_DSM_14662	DS499735	DS499735 Anaerostipes caccae DSM 14662 Scfld_03_16 genomic scaffold, whole genome shotgun sequence. [Anaerostipes caccae DSM 14662]	406058	165498	174475		Bacillus_phage(50.0%)	7	NA	NA
Anaerostipes_caccae_DSM_14662	DS499739	DS499739 Anaerostipes caccae DSM 14662 Scfld_03_20 genomic scaffold, whole genome shotgun sequence. [Anaerostipes caccae DSM 14662]	21510	651	9449	tRNA,protease	uncultured_virus(33.33%)	7	NA	NA
Anaerostipes_caccae_DSM_14662	DS499740	DS499740 Anaerostipes caccae DSM 14662 Scfld_03_21 genomic scaffold, whole genome shotgun sequence. [Anaerostipes caccae DSM 14662]	450160	327952	340148	tRNA	Bacteriophage(42.86%)	11	NA	NA
Anaerostipes_caccae_DSM_14662	DS499742	DS499742 Anaerostipes caccae DSM 14662 Scfld_03_23 genomic scaffold, whole genome shotgun sequence. [Anaerostipes caccae DSM 14662]	150708	30018	41230		Streptococcus_phage(33.33%)	8	NA	NA
Anaerostipes_caccae_DSM_14662	DS499731	DS499731 Anaerostipes caccae DSM 14662 Scfld_03_12 genomic scaffold, whole genome shotgun sequence. [Anaerostipes caccae DSM 14662]	261254	21217	28714		Bacillus_phage(33.33%)	12	NA	NA
Anaerostipes_caccae_DSM_14662	DS499731	DS499731 Anaerostipes caccae DSM 14662 Scfld_03_12 genomic scaffold, whole genome shotgun sequence. [Anaerostipes caccae DSM 14662]	261254	129224	188868	transposase,protease	Streptococcus_phage(35.19%)	70	NA	NA
Anaerostipes_caccae_DSM_14662	DS499731	DS499731 Anaerostipes caccae DSM 14662 Scfld_03_12 genomic scaffold, whole genome shotgun sequence. [Anaerostipes caccae DSM 14662]	261254	191960	204965		Faecalibacterium_phage(23.08%)	26	NA	NA
Anaerostipes_caccae_DSM_14662	DS499733	DS499733 Anaerostipes caccae DSM 14662 Scfld_03_14 genomic scaffold, whole genome shotgun sequence. [Anaerostipes caccae DSM 14662]	760746	686139	696368		uncultured_phage(22.22%)	12	NA	NA
Helicobacter_pylori_HP250BFii	KB636501	KB636501 Helicobacter pylori HP250BFii genomic scaffold Scfld9, whole genome shotgun sequence. [Helicobacter pylori HP250BFii]	5420	655	5369		Escherichia_phage(100.0%)	7	NA	NA
Helicobacter_pylori_HP250BFii	KB636475	KB636475 Helicobacter pylori HP250BFii genomic scaffold Scfld164, whole genome shotgun sequence. [Helicobacter pylori HP250BFii]	138379	97672	105928	tRNA	Synechococcus_phage(33.33%)	8	NA	NA
Helicobacter_pylori_HP250BFii	KB636494	KB636494 Helicobacter pylori HP250BFii genomic scaffold Scfld62, whole genome shotgun sequence. [Helicobacter pylori HP250BFii]	98859	60453	71352		uncultured_Caudovirales_phage(33.33%)	9	NA	NA
Escherichia_coli_MS_16-3	GG773563	GG773563 Escherichia coli MS 16-3 genomic scaffold Scfld407, whole genome shotgun sequence. [Escherichia coli MS 16-3]	14967	5554	12668	transposase	Escherichia_phage(37.5%)	10	NA	NA
Escherichia_coli_MS_16-3	GG773533	GG773533 Escherichia coli MS 16-3 genomic scaffold Scfld192, whole genome shotgun sequence. [Escherichia coli MS 16-3]	164810	156917	163699	tRNA	Salmonella_phage(16.67%)	10	NA	NA
Escherichia_coli_MS_16-3	GG773517	GG773517 Escherichia coli MS 16-3 genomic scaffold Scfld138, whole genome shotgun sequence. [Escherichia coli MS 16-3]	11690	712	11497	transposase	Stx2-converting_phage(22.22%)	14	NA	NA
Escherichia_coli_MS_16-3	GG773536	GG773536 Escherichia coli MS 16-3 genomic scaffold Scfld208, whole genome shotgun sequence. [Escherichia coli MS 16-3]	193300	93818	100958		Escherichia_phage(83.33%)	6	NA	NA
Escherichia_coli_MS_16-3	GG773524	GG773524 Escherichia coli MS 16-3 genomic scaffold Scfld162, whole genome shotgun sequence. [Escherichia coli MS 16-3]	263632	133581	175682	integrase,tRNA	Enterobacteria_phage(45.0%)	63	130554:130567	135772:135785
Escherichia_coli_MS_16-3	GG773524	GG773524 Escherichia coli MS 16-3 genomic scaffold Scfld162, whole genome shotgun sequence. [Escherichia coli MS 16-3]	263632	180771	191903		Sodalis_phage(14.29%)	10	NA	NA
Escherichia_coli_MS_16-3	GG773568	GG773568 Escherichia coli MS 16-3 genomic scaffold Scfld490, whole genome shotgun sequence. [Escherichia coli MS 16-3]	150562	93248	129213	tail	Enterobacteria_phage(40.48%)	46	NA	NA
Escherichia_coli_MS_16-3	GG773555	GG773555 Escherichia coli MS 16-3 genomic scaffold Scfld326, whole genome shotgun sequence. [Escherichia coli MS 16-3]	190630	77449	89190	integrase	Enterobacteria_phage(90.0%)	13	77267:77289	88080:88102
Escherichia_coli_MS_16-3	GG773510	GG773510 Escherichia coli MS 16-3 genomic scaffold Scfld116, whole genome shotgun sequence. [Escherichia coli MS 16-3]	152122	56956	66957	tRNA	Brazilian_cedratvirus(14.29%)	12	NA	NA
Escherichia_coli_MS_16-3	GG773510	GG773510 Escherichia coli MS 16-3 genomic scaffold Scfld116, whole genome shotgun sequence. [Escherichia coli MS 16-3]	152122	98198	104806		Escherichia_phage(57.14%)	7	NA	NA
Escherichia_coli_MS_16-3	GG773553	GG773553 Escherichia coli MS 16-3 genomic scaffold Scfld305, whole genome shotgun sequence. [Escherichia coli MS 16-3]	58854	5250	55807	transposase,tRNA	Stx2-converting_phage(21.05%)	59	NA	NA
Escherichia_coli_MS_16-3	GG773565	GG773565 Escherichia coli MS 16-3 genomic scaffold Scfld427, whole genome shotgun sequence. [Escherichia coli MS 16-3]	29940	6549	14418	transposase	Shigella_phage(50.0%)	8	NA	NA
Escherichia_coli_MS_16-3	GG773532	GG773532 Escherichia coli MS 16-3 genomic scaffold Scfld187, whole genome shotgun sequence. [Escherichia coli MS 16-3]	283260	13593	19903		Enterobacteria_phage(50.0%)	6	NA	NA
Escherichia_coli_MS_16-3	GG773532	GG773532 Escherichia coli MS 16-3 genomic scaffold Scfld187, whole genome shotgun sequence. [Escherichia coli MS 16-3]	283260	110384	119934		Enterobacteria_phage(75.0%)	10	NA	NA
Ruminococcus_bromii_L2-63	FP929051	FP929051 Ruminococcus bromii L2-63 draft genome. [Ruminococcus bromii L2-63]	2249085	250242	265501		Faecalibacterium_phage(18.18%)	23	NA	NA
Ruminococcus_bromii_L2-63	FP929051	FP929051 Ruminococcus bromii L2-63 draft genome. [Ruminococcus bromii L2-63]	2249085	1401788	1410794	tRNA	Streptococcus_phage(33.33%)	9	NA	NA
Peptoclostridium_Clostridium_hiranonis_DSM_13275	DS995359	DS995359 Clostridium hiranonis DSM 13275 Scfld7 genomic scaffold, whole genome shotgun sequence. [Peptoclostridium [Clostridium] hiranonis DSM 13275]	180888	25454	36802	holin	Staphylococcus_phage(14.29%)	12	NA	NA
Peptoclostridium_Clostridium_hiranonis_DSM_13275	DS995355	DS995355 Clostridium hiranonis DSM 13275 Scfld1 genomic scaffold, whole genome shotgun sequence. [Peptoclostridium [Clostridium] hiranonis DSM 13275]	575376	263685	287520	protease	Clostridium_phage(73.91%)	40	NA	NA
Peptoclostridium_Clostridium_hiranonis_DSM_13275	DS995356	DS995356 Clostridium hiranonis DSM 13275 Scfld3 genomic scaffold, whole genome shotgun sequence. [Peptoclostridium [Clostridium] hiranonis DSM 13275]	963379	854463	865916		Clostridium_phage(40.0%)	19	NA	NA
Peptoclostridium_Clostridium_hiranonis_DSM_13275	DS995356	DS995356 Clostridium hiranonis DSM 13275 Scfld3 genomic scaffold, whole genome shotgun sequence. [Peptoclostridium [Clostridium] hiranonis DSM 13275]	963379	874268	901711	protease	Clostridium_phage(54.17%)	38	NA	NA
Roseburia_intestinalis_M50_1	FP929049	FP929049 Roseburia intestinalis M50/1 draft genome. [Roseburia intestinalis M50/1]	4143550	216168	226195		Staphylococcus_phage(33.33%)	6	NA	NA
Roseburia_intestinalis_M50_1	FP929049	FP929049 Roseburia intestinalis M50/1 draft genome. [Roseburia intestinalis M50/1]	4143550	426046	435219		Escherichia_phage(33.33%)	9	NA	NA
Roseburia_intestinalis_M50_1	FP929049	FP929049 Roseburia intestinalis M50/1 draft genome. [Roseburia intestinalis M50/1]	4143550	962165	968551		Streptococcus_phage(33.33%)	8	NA	NA
Roseburia_intestinalis_M50_1	FP929049	FP929049 Roseburia intestinalis M50/1 draft genome. [Roseburia intestinalis M50/1]	4143550	1143142	1157414		Streptococcus_phage(100.0%)	17	NA	NA
Roseburia_intestinalis_M50_1	FP929049	FP929049 Roseburia intestinalis M50/1 draft genome. [Roseburia intestinalis M50/1]	4143550	3661383	3684644		uncultured_Caudovirales_phage(42.11%)	32	NA	NA
Helicobacter_pylori_HP250BSi	KB644303	KB644303 Helicobacter pylori HP250BSi genomic scaffold Scfld67, whole genome shotgun sequence. [Helicobacter pylori HP250BSi]	98912	27507	38408		uncultured_Caudovirales_phage(33.33%)	10	NA	NA
Helicobacter_pylori_HP250BSi	KB644261	KB644261 Helicobacter pylori HP250BSi genomic scaffold Scfld0, whole genome shotgun sequence. [Helicobacter pylori HP250BSi]	5420	113	5206		Escherichia_phage(100.0%)	7	NA	NA
Ruminiclostridium_Eubacterium_siraeum_70_3	FP929044	FP929044 Eubacterium siraeum 70/3 draft genome. [Ruminiclostridium [Eubacterium] siraeum 70/3]	2943413	2161739	2171527		Paenibacillus_phage(57.14%)	8	NA	NA
Burkholderiales_bacterium_1_1_47	GL383997	GL383997 Burkholderiales bacterium 1_1_47 genomic scaffold supercont1.6, whole genome shotgun sequence. [Burkholderiales bacterium 1_1_47]	281297	65185	81776		Bordetella_phage(50.0%)	10	NA	NA
Burkholderiales_bacterium_1_1_47	GL383997	GL383997 Burkholderiales bacterium 1_1_47 genomic scaffold supercont1.6, whole genome shotgun sequence. [Burkholderiales bacterium 1_1_47]	281297	131071	140064		Psychrobacter_phage(12.5%)	10	NA	NA
Burkholderiales_bacterium_1_1_47	GL383997	GL383997 Burkholderiales bacterium 1_1_47 genomic scaffold supercont1.6, whole genome shotgun sequence. [Burkholderiales bacterium 1_1_47]	281297	224558	237127	tRNA	Klosneuvirus(25.0%)	10	NA	NA
Lactobacillus_fermentum_ATCC_14931	GG669904	GG669904 Lactobacillus fermentum ATCC 14931 genomic scaffold SCAFFOLD5, whole genome shotgun sequence. [Lactobacillus fermentum ATCC 14931]	189576	144864	153132		Staphylococcus_phage(28.57%)	8	NA	NA
Lactobacillus_fermentum_ATCC_14931	GG669901	GG669901 Lactobacillus fermentum ATCC 14931 genomic scaffold SCAFFOLD2, whole genome shotgun sequence. [Lactobacillus fermentum ATCC 14931]	267775	71645	77501		Staphylococcus_phage(66.67%)	7	NA	NA
Lactobacillus_fermentum_ATCC_14931	GG669911	GG669911 Lactobacillus fermentum ATCC 14931 genomic scaffold SCAFFOLD12, whole genome shotgun sequence. [Lactobacillus fermentum ATCC 14931]	62013	49860	58332	tRNA	Enterococcus_phage(33.33%)	10	NA	NA
Helicobacter_pylori_GAM83Bi	KB641728	KB641728 Helicobacter pylori GAM83Bi genomic scaffold Scfld11, whole genome shotgun sequence. [Helicobacter pylori GAM83Bi]	5418	717	5402		Escherichia_phage(100.0%)	7	NA	NA
Helicobacter_pylori_GAM83Bi	KB641766	KB641766 Helicobacter pylori GAM83Bi genomic scaffold Scfld5, whole genome shotgun sequence. [Helicobacter pylori GAM83Bi]	91205	78231	91179		Helicobacter_phage(100.0%)	18	NA	NA
Helicobacter_pylori_GAM83Bi	KB641725	KB641725 Helicobacter pylori GAM83Bi genomic scaffold Scfld1, whole genome shotgun sequence. [Helicobacter pylori GAM83Bi]	11990	2358	10620		Helicobacter_phage(100.0%)	10	NA	NA
Helicobacter_pylori_GAM114Ai	KB642400	KB642400 Helicobacter pylori GAM114Ai genomic scaffold Scfld19, whole genome shotgun sequence. [Helicobacter pylori GAM114Ai]	5420	44	4545		Escherichia_phage(100.0%)	7	NA	NA
Lactobacillus_fermentum_IFO_3956	AP008937	AP008937 Lactobacillus fermentum IFO 3956 DNA, complete genome. [Lactobacillus fermentum IFO 3956]	2098685	12872	23173	protease	Bacillus_phage(33.33%)	9	NA	NA
Lactobacillus_fermentum_IFO_3956	AP008937	AP008937 Lactobacillus fermentum IFO 3956 DNA, complete genome. [Lactobacillus fermentum IFO 3956]	2098685	537218	575693		Lactobacillus_phage(84.38%)	49	NA	NA
Lactobacillus_fermentum_IFO_3956	AP008937	AP008937 Lactobacillus fermentum IFO 3956 DNA, complete genome. [Lactobacillus fermentum IFO 3956]	2098685	751285	841800	transposase,protease,tRNA	Lactobacillus_phage(36.11%)	97	NA	NA
Lactobacillus_fermentum_IFO_3956	AP008937	AP008937 Lactobacillus fermentum IFO 3956 DNA, complete genome. [Lactobacillus fermentum IFO 3956]	2098685	1329038	1381004	transposase,tRNA	Paenibacillus_phage(26.67%)	48	NA	NA
Lactobacillus_fermentum_IFO_3956	AP008937	AP008937 Lactobacillus fermentum IFO 3956 DNA, complete genome. [Lactobacillus fermentum IFO 3956]	2098685	1571766	1664297	transposase,protease,tRNA	Streptococcus_phage(15.38%)	95	NA	NA
Lactobacillus_fermentum_IFO_3956	AP008937	AP008937 Lactobacillus fermentum IFO 3956 DNA, complete genome. [Lactobacillus fermentum IFO 3956]	2098685	1727119	1773538	transposase	Paenibacillus_phage(33.33%)	51	NA	NA
Lactobacillus_fermentum_IFO_3956	AP008937	AP008937 Lactobacillus fermentum IFO 3956 DNA, complete genome. [Lactobacillus fermentum IFO 3956]	2098685	1960770	2073068	transposase,tRNA	Paenibacillus_phage(28.57%)	113	NA	NA
Lachnospiraceae_bacterium_3_1_46FAA	GL890521	GL890521 Lachnospiraceae bacterium 3_1_46FAA genomic scaffold supercont1.2, whole genome shotgun sequence. [Lachnospiraceae bacterium 3_1_46FAA]	919149	472547	490687		Clostridium_phage(42.86%)	21	NA	NA
Lachnospiraceae_bacterium_3_1_46FAA	GL890521	GL890521 Lachnospiraceae bacterium 3_1_46FAA genomic scaffold supercont1.2, whole genome shotgun sequence. [Lachnospiraceae bacterium 3_1_46FAA]	919149	495366	513604		Bacillus_phage(14.29%)	28	NA	NA
Lachnospiraceae_bacterium_3_1_46FAA	GL890521	GL890521 Lachnospiraceae bacterium 3_1_46FAA genomic scaffold supercont1.2, whole genome shotgun sequence. [Lachnospiraceae bacterium 3_1_46FAA]	919149	517317	540722	transposase	Clostridium_phage(38.89%)	35	NA	NA
Lachnospiraceae_bacterium_3_1_46FAA	GL890521	GL890521 Lachnospiraceae bacterium 3_1_46FAA genomic scaffold supercont1.2, whole genome shotgun sequence. [Lachnospiraceae bacterium 3_1_46FAA]	919149	681495	705358		Faecalibacterium_phage(39.13%)	34	NA	NA
Lachnospiraceae_bacterium_3_1_46FAA	GL890520	GL890520 Lachnospiraceae bacterium 3_1_46FAA genomic scaffold supercont1.1, whole genome shotgun sequence. [Lachnospiraceae bacterium 3_1_46FAA]	923619	11054	18548		Erysipelothrix_phage(77.78%)	11	NA	NA
Lachnospiraceae_bacterium_3_1_46FAA	GL890520	GL890520 Lachnospiraceae bacterium 3_1_46FAA genomic scaffold supercont1.1, whole genome shotgun sequence. [Lachnospiraceae bacterium 3_1_46FAA]	923619	454466	470136		Streptococcus_phage(90.91%)	19	NA	NA
Lachnospiraceae_bacterium_3_1_46FAA	GL890520	GL890520 Lachnospiraceae bacterium 3_1_46FAA genomic scaffold supercont1.1, whole genome shotgun sequence. [Lachnospiraceae bacterium 3_1_46FAA]	923619	833721	848508		Streptococcus_phage(100.0%)	15	NA	NA
Lachnospiraceae_bacterium_3_1_46FAA	GL890524	GL890524 Lachnospiraceae bacterium 3_1_46FAA genomic scaffold supercont1.5, whole genome shotgun sequence. [Lachnospiraceae bacterium 3_1_46FAA]	309298	71237	77073		Thermus_phage(28.57%)	11	NA	NA
Lachnospiraceae_bacterium_3_1_46FAA	GL890524	GL890524 Lachnospiraceae bacterium 3_1_46FAA genomic scaffold supercont1.5, whole genome shotgun sequence. [Lachnospiraceae bacterium 3_1_46FAA]	309298	80814	91304		Streptococcus_phage(53.85%)	16	NA	NA
Lachnospiraceae_bacterium_3_1_46FAA	GL890524	GL890524 Lachnospiraceae bacterium 3_1_46FAA genomic scaffold supercont1.5, whole genome shotgun sequence. [Lachnospiraceae bacterium 3_1_46FAA]	309298	193837	253887	protease	Erysipelothrix_phage(58.18%)	64	NA	NA
Lachnospiraceae_bacterium_3_1_46FAA	GL890524	GL890524 Lachnospiraceae bacterium 3_1_46FAA genomic scaffold supercont1.5, whole genome shotgun sequence. [Lachnospiraceae bacterium 3_1_46FAA]	309298	259083	282256	protease	Erysipelothrix_phage(38.1%)	29	NA	NA
Lachnospiraceae_bacterium_3_1_46FAA	GL890522	GL890522 Lachnospiraceae bacterium 3_1_46FAA genomic scaffold supercont1.3, whole genome shotgun sequence. [Lachnospiraceae bacterium 3_1_46FAA]	377765	170608	185629		Faecalibacterium_phage(46.15%)	22	NA	NA
Lachnospiraceae_bacterium_3_1_46FAA	GL890522	GL890522 Lachnospiraceae bacterium 3_1_46FAA genomic scaffold supercont1.3, whole genome shotgun sequence. [Lachnospiraceae bacterium 3_1_46FAA]	377765	194467	224426		Faecalibacterium_phage(23.08%)	32	NA	NA
Enterobacteriaceae_bacterium_9_2_54FAA	ADCU02000001	ADCU02000001 Enterobacteriaceae bacterium 9_2_54FAA acqcy-supercont2.1, whole genome shotgun sequence. [Enterobacteriaceae bacterium 9_2_54FAA]	4473987	287975	345874	integrase,protease,transposase	Bacillus_virus(14.29%)	60	327092:327141	353308:353357
Enterobacteriaceae_bacterium_9_2_54FAA	ADCU02000001	ADCU02000001 Enterobacteriaceae bacterium 9_2_54FAA acqcy-supercont2.1, whole genome shotgun sequence. [Enterobacteriaceae bacterium 9_2_54FAA]	4473987	1801500	1848586		Escherichia_phage(19.23%)	71	NA	NA
Enterobacteriaceae_bacterium_9_2_54FAA	ADCU02000001	ADCU02000001 Enterobacteriaceae bacterium 9_2_54FAA acqcy-supercont2.1, whole genome shotgun sequence. [Enterobacteriaceae bacterium 9_2_54FAA]	4473987	3020331	3034364	tRNA	Tupanvirus(33.33%)	13	NA	NA
Enterobacteriaceae_bacterium_9_2_54FAA	ADCU02000001	ADCU02000001 Enterobacteriaceae bacterium 9_2_54FAA acqcy-supercont2.1, whole genome shotgun sequence. [Enterobacteriaceae bacterium 9_2_54FAA]	4473987	3375977	3423136		Salmonella_phage(30.77%)	67	NA	NA
Enterobacteriaceae_bacterium_9_2_54FAA	ADCU02000001	ADCU02000001 Enterobacteriaceae bacterium 9_2_54FAA acqcy-supercont2.1, whole genome shotgun sequence. [Enterobacteriaceae bacterium 9_2_54FAA]	4473987	3556453	3564395	tRNA	Escherichia_phage(66.67%)	6	NA	NA
Enterobacteriaceae_bacterium_9_2_54FAA	ADCU02000001	ADCU02000001 Enterobacteriaceae bacterium 9_2_54FAA acqcy-supercont2.1, whole genome shotgun sequence. [Enterobacteriaceae bacterium 9_2_54FAA]	4473987	4069766	4099713		Cronobacter_phage(83.33%)	36	NA	NA
Bacteroides_eggerthii_DSM_20697	DS995510	DS995510 Bacteroides eggerthii DSM 20697 Scfld2 genomic scaffold, whole genome shotgun sequence. [Bacteroides eggerthii DSM 20697]	1194706	405507	414522		Cellulophaga_phage(33.33%)	10	NA	NA
Helicobacter_pylori_HP250BFi	KB636172	KB636172 Helicobacter pylori HP250BFi genomic scaffold Scfld46, whole genome shotgun sequence. [Helicobacter pylori HP250BFi]	101549	27589	38681		uncultured_Caudovirales_phage(28.57%)	10	NA	NA
Helicobacter_pylori_HP250BFi	KB636154	KB636154 Helicobacter pylori HP250BFi genomic scaffold Scfld2, whole genome shotgun sequence. [Helicobacter pylori HP250BFi]	5420	825	5054		Escherichia_phage(100.0%)	7	NA	NA
Eubacterium_Eubacterium_hallii_DSM_3353	ACEP01000112	ACEP01000112 [Eubacterium] hallii DSM 3353 E_hallii-1.0_Cont378.1, whole genome shotgun sequence. [Eubacterium [Eubacterium] hallii DSM 3353]	60277	41379	49699		Streptococcus_phage(28.57%)	14	NA	NA
Eubacterium_Eubacterium_hallii_DSM_3353	ACEP01000029	ACEP01000029 [Eubacterium] hallii DSM 3353 E_hallii-1.0_Cont31.1, whole genome shotgun sequence. [Eubacterium [Eubacterium] hallii DSM 3353]	117864	4804	11591		Streptococcus_phage(33.33%)	10	NA	NA
Eubacterium_Eubacterium_hallii_DSM_3353	ACEP01000089	ACEP01000089 [Eubacterium] hallii DSM 3353 E_hallii-1.0_Cont96.1, whole genome shotgun sequence. [Eubacterium [Eubacterium] hallii DSM 3353]	27475	17379	25184		Clostridium_phage(33.33%)	10	NA	NA
Fusobacterium_nucleatum_subsp._animalis_3_1_33	KI391961	KI391961 Fusobacterium nucleatum subsp. animalis 3_1_33 genomic scaffold supercont2.1, whole genome shotgun sequence. [Fusobacterium nucleatum subsp. animalis 3_1_33]	1306873	824363	835094		Synechococcus_phage(28.57%)	8	NA	NA
Fusobacterium_nucleatum_subsp._animalis_3_1_33	KI391962	KI391962 Fusobacterium nucleatum subsp. animalis 3_1_33 genomic scaffold supercont2.2, whole genome shotgun sequence. [Fusobacterium nucleatum subsp. animalis 3_1_33]	359834	282549	292394		Moumouvirus(33.33%)	8	NA	NA
Fusobacterium_gonidiaformans_3-1-5R	GG657971	GG657971 Fusobacterium sp. 3_1_5R genomic scaffold supercont1.1, whole genome shotgun sequence. [Fusobacterium gonidiaformans 3-1-5R]	965540	60915	82433		Streptococcus_phage(23.53%)	36	NA	NA
Fusobacterium_gonidiaformans_3-1-5R	GG657971	GG657971 Fusobacterium sp. 3_1_5R genomic scaffold supercont1.1, whole genome shotgun sequence. [Fusobacterium gonidiaformans 3-1-5R]	965540	109500	119091	transposase	Lysinibacillus_phage(28.57%)	14	NA	NA
Fusobacterium_gonidiaformans_3-1-5R	GG657971	GG657971 Fusobacterium sp. 3_1_5R genomic scaffold supercont1.1, whole genome shotgun sequence. [Fusobacterium gonidiaformans 3-1-5R]	965540	140330	152319		Vibrio_phage(20.0%)	18	NA	NA
Fusobacterium_gonidiaformans_3-1-5R	GG657971	GG657971 Fusobacterium sp. 3_1_5R genomic scaffold supercont1.1, whole genome shotgun sequence. [Fusobacterium gonidiaformans 3-1-5R]	965540	279153	299643		Fusobacterium_phage(85.71%)	27	NA	NA
Fusobacterium_gonidiaformans_3-1-5R	GG657971	GG657971 Fusobacterium sp. 3_1_5R genomic scaffold supercont1.1, whole genome shotgun sequence. [Fusobacterium gonidiaformans 3-1-5R]	965540	466004	478054		Prochlorococcus_phage(22.22%)	10	NA	NA
Fusobacterium_gonidiaformans_3-1-5R	GG657971	GG657971 Fusobacterium sp. 3_1_5R genomic scaffold supercont1.1, whole genome shotgun sequence. [Fusobacterium gonidiaformans 3-1-5R]	965540	571376	583032		Liberibacter_phage(16.67%)	7	NA	NA
Fusobacterium_gonidiaformans_3-1-5R	GG657971	GG657971 Fusobacterium sp. 3_1_5R genomic scaffold supercont1.1, whole genome shotgun sequence. [Fusobacterium gonidiaformans 3-1-5R]	965540	691173	699068	tRNA	Bacillus_virus(33.33%)	10	NA	NA
Fusobacterium_gonidiaformans_3-1-5R	GG657974	GG657974 Fusobacterium sp. 3_1_5R genomic scaffold supercont1.4, whole genome shotgun sequence. [Fusobacterium gonidiaformans 3-1-5R]	173616	42368	47955	transposase	Enterobacteria_phage(16.67%)	7	NA	NA
Fusobacterium_gonidiaformans_3-1-5R	GG657974	GG657974 Fusobacterium sp. 3_1_5R genomic scaffold supercont1.4, whole genome shotgun sequence. [Fusobacterium gonidiaformans 3-1-5R]	173616	52376	69190		Clostridium_phage(41.67%)	22	NA	NA
Fusobacterium_gonidiaformans_3-1-5R	GG657974	GG657974 Fusobacterium sp. 3_1_5R genomic scaffold supercont1.4, whole genome shotgun sequence. [Fusobacterium gonidiaformans 3-1-5R]	173616	152968	159550		Staphylococcus_phage(66.67%)	7	NA	NA
Coprobacillus_sp._3_3_56FAA	JH470430	JH470430 Coprobacillus sp. 3_3_56FAA genomic scaffold supercont1.7, whole genome shotgun sequence. [Coprobacillus sp. 3_3_56FAA]	215068	11830	26012		Streptococcus_pyogenes_phage(50.0%)	9	NA	NA
Coprobacillus_sp._3_3_56FAA	JH470425	JH470425 Coprobacillus sp. 3_3_56FAA genomic scaffold supercont1.2, whole genome shotgun sequence. [Coprobacillus sp. 3_3_56FAA]	1006504	645547	658941	protease	Erysipelothrix_phage(70.0%)	16	NA	NA
Coprobacillus_sp._3_3_56FAA	JH470425	JH470425 Coprobacillus sp. 3_3_56FAA genomic scaffold supercont1.2, whole genome shotgun sequence. [Coprobacillus sp. 3_3_56FAA]	1006504	903518	911375		Synechococcus_phage(50.0%)	8	NA	NA
Coprobacillus_sp._3_3_56FAA	JH470424	JH470424 Coprobacillus sp. 3_3_56FAA genomic scaffold supercont1.1, whole genome shotgun sequence. [Coprobacillus sp. 3_3_56FAA]	1152122	246539	281142		uncultured_Caudovirales_phage(34.62%)	52	NA	NA
Coprobacillus_sp._3_3_56FAA	JH470424	JH470424 Coprobacillus sp. 3_3_56FAA genomic scaffold supercont1.1, whole genome shotgun sequence. [Coprobacillus sp. 3_3_56FAA]	1152122	472182	477474		uncultured_phage(28.57%)	7	NA	NA
Coprobacillus_sp._3_3_56FAA	JH470424	JH470424 Coprobacillus sp. 3_3_56FAA genomic scaffold supercont1.1, whole genome shotgun sequence. [Coprobacillus sp. 3_3_56FAA]	1152122	833512	839686		Clostridium_phage(16.67%)	8	NA	NA
Subdoligranulum_variabile_DSM_15176	GG704769	GG704769 Subdoligranulum variabile DSM 15176 genomic scaffold Scfld0, whole genome shotgun sequence. [Subdoligranulum variabile DSM 15176]	2385595	1115392	1123919		Streptococcus_phage(33.33%)	8	NA	NA
Subdoligranulum_variabile_DSM_15176	GG704769	GG704769 Subdoligranulum variabile DSM 15176 genomic scaffold Scfld0, whole genome shotgun sequence. [Subdoligranulum variabile DSM 15176]	2385595	1759162	1764368		Clostridium_phage(16.67%)	7	NA	NA
Subdoligranulum_variabile_DSM_15176	GG704769	GG704769 Subdoligranulum variabile DSM 15176 genomic scaffold Scfld0, whole genome shotgun sequence. [Subdoligranulum variabile DSM 15176]	2385595	1768697	1778626		Clostridium_phage(22.22%)	13	NA	NA
Subdoligranulum_variabile_DSM_15176	GG704769	GG704769 Subdoligranulum variabile DSM 15176 genomic scaffold Scfld0, whole genome shotgun sequence. [Subdoligranulum variabile DSM 15176]	2385595	2212145	2218853		Bacillus_phage(33.33%)	8	NA	NA
Subdoligranulum_variabile_DSM_15176	GG704771	GG704771 Subdoligranulum variabile DSM 15176 genomic scaffold Scfld2, whole genome shotgun sequence. [Subdoligranulum variabile DSM 15176]	367229	37115	50914		Clostridium_phage(37.5%)	16	NA	NA
Enterococcus_faecalis_TX0104	GG668936	GG668936 Enterococcus faecalis TX0104 genomic scaffold SCAFFOLD15, whole genome shotgun sequence. [Enterococcus faecalis TX0104]	16995	134	16602		Enterococcus_phage(86.36%)	23	NA	NA
Enterococcus_faecalis_TX0104	GG668932	GG668932 Enterococcus faecalis TX0104 genomic scaffold SCAFFOLD11, whole genome shotgun sequence. [Enterococcus faecalis TX0104]	40981	21052	39427	transposase	Streptococcus_phage(47.37%)	24	NA	NA
Enterococcus_faecalis_TX0104	GG668925	GG668925 Enterococcus faecalis TX0104 genomic scaffold SCAFFOLD4, whole genome shotgun sequence. [Enterococcus faecalis TX0104]	128375	24220	36478	transposase	Streptococcus_phage(90.0%)	17	NA	NA
Enterococcus_faecalis_TX0104	GG668927	GG668927 Enterococcus faecalis TX0104 genomic scaffold SCAFFOLD6, whole genome shotgun sequence. [Enterococcus faecalis TX0104]	166681	21920	29839	transposase	Planktothrix_phage(33.33%)	11	NA	NA
Enterococcus_faecalis_TX0104	GG668933	GG668933 Enterococcus faecalis TX0104 genomic scaffold SCAFFOLD12, whole genome shotgun sequence. [Enterococcus faecalis TX0104]	104751	89356	96278		Enterococcus_phage(33.33%)	7	NA	NA
Enterococcus_faecalis_TX0104	GG668940	GG668940 Enterococcus faecalis TX0104 genomic scaffold SCAFFOLD19, whole genome shotgun sequence. [Enterococcus faecalis TX0104]	13476	211	8169		Lactococcus_phage(42.86%)	8	NA	NA
Enterococcus_faecalis_TX0104	GG668922	GG668922 Enterococcus faecalis TX0104 genomic scaffold SCAFFOLD1, whole genome shotgun sequence. [Enterococcus faecalis TX0104]	742477	226267	246942	tRNA	Enterococcus_phage(37.5%)	24	NA	NA
Enterococcus_faecalis_TX0104	GG668923	GG668923 Enterococcus faecalis TX0104 genomic scaffold SCAFFOLD2, whole genome shotgun sequence. [Enterococcus faecalis TX0104]	492313	61230	72143		Streptococcus_phage(50.0%)	12	NA	NA
Enterococcus_faecalis_TX0104	GG668923	GG668923 Enterococcus faecalis TX0104 genomic scaffold SCAFFOLD2, whole genome shotgun sequence. [Enterococcus faecalis TX0104]	492313	138968	145335		Enterococcus_phage(33.33%)	12	NA	NA
Enterococcus_faecalis_TX0104	GG668923	GG668923 Enterococcus faecalis TX0104 genomic scaffold SCAFFOLD2, whole genome shotgun sequence. [Enterococcus faecalis TX0104]	492313	149057	172616	protease	Enterococcus_phage(28.57%)	27	NA	NA
Enterococcus_faecalis_TX0104	GG668923	GG668923 Enterococcus faecalis TX0104 genomic scaffold SCAFFOLD2, whole genome shotgun sequence. [Enterococcus faecalis TX0104]	492313	191444	205582	integrase	Enterococcus_phage(84.21%)	27	183358:183373	211826:211841
Enterococcus_faecalis_TX0104	GG668923	GG668923 Enterococcus faecalis TX0104 genomic scaffold SCAFFOLD2, whole genome shotgun sequence. [Enterococcus faecalis TX0104]	492313	209767	231089		Enterococcus_phage(68.18%)	25	NA	NA
Enterococcus_faecalis_TX0104	GG668937	GG668937 Enterococcus faecalis TX0104 genomic scaffold SCAFFOLD16, whole genome shotgun sequence. [Enterococcus faecalis TX0104]	10511	0	5721		Enterococcus_phage(55.56%)	14	NA	NA
Odoribacter_laneus_YIT_12061	JH594596	JH594596 Odoribacter laneus YIT 12061 genomic scaffold supercont1.1, whole genome shotgun sequence. [Odoribacter laneus YIT 12061]	2957506	413273	422887		Escherichia_phage(42.86%)	8	NA	NA
Odoribacter_laneus_YIT_12061	JH594597	JH594597 Odoribacter laneus YIT 12061 genomic scaffold supercont1.2, whole genome shotgun sequence. [Odoribacter laneus YIT 12061]	456264	218193	229155		Streptomyces_phage(33.33%)	8	NA	NA
Prevotella_copri_DSM_18205	GG703855	GG703855 Prevotella copri DSM 18205 genomic scaffold Scfld3, whole genome shotgun sequence. [Prevotella copri DSM 18205]	294362	20406	84089	protease,tRNA,transposase	Acidithiobacillus_phage(22.22%)	58	NA	NA
Escherichia_coli_MS_79-10	ADWR01000042	ADWR01000042 Escherichia coli MS 79-10 E_coliMS79-10-1.0.1_Cont41.1, whole genome shotgun sequence. [Escherichia coli MS 79-10]	41010	31030	39091		Salmonella_phage(83.33%)	13	NA	NA
Escherichia_coli_MS_79-10	ADWR01000097	ADWR01000097 Escherichia coli MS 79-10 E_coliMS79-10-1.0.1_Cont96.1, whole genome shotgun sequence. [Escherichia coli MS 79-10]	9873	191	9858	transposase	Enterobacteria_phage(60.0%)	13	NA	NA
Escherichia_coli_MS_79-10	ADWR01000017	ADWR01000017 Escherichia coli MS 79-10 E_coliMS79-10-1.0.1_Cont16.1, whole genome shotgun sequence. [Escherichia coli MS 79-10]	83246	18385	28346	protease,tRNA	Dickeya_phage(16.67%)	8	NA	NA
Escherichia_coli_MS_79-10	ADWR01000026	ADWR01000026 Escherichia coli MS 79-10 E_coliMS79-10-1.0.1_Cont25.1, whole genome shotgun sequence. [Escherichia coli MS 79-10]	63332	648	8501		Staphylococcus_phage(16.67%)	9	NA	NA
Escherichia_coli_MS_79-10	ADWR01000057	ADWR01000057 Escherichia coli MS 79-10 E_coliMS79-10-1.0.1_Cont56.1, whole genome shotgun sequence. [Escherichia coli MS 79-10]	27663	361	10161	tRNA	Escherichia_phage(75.0%)	13	NA	NA
Escherichia_coli_MS_79-10	ADWR01000049	ADWR01000049 Escherichia coli MS 79-10 E_coliMS79-10-1.0.1_Cont48.1, whole genome shotgun sequence. [Escherichia coli MS 79-10]	33269	7245	32744	transposase,tail	Shigella_phage(60.0%)	40	NA	NA
Escherichia_coli_MS_79-10	ADWR01000015	ADWR01000015 Escherichia coli MS 79-10 E_coliMS79-10-1.0.1_Cont14.1, whole genome shotgun sequence. [Escherichia coli MS 79-10]	87520	38986	46126		Escherichia_phage(83.33%)	6	NA	NA
Escherichia_coli_MS_79-10	ADWR01000072	ADWR01000072 Escherichia coli MS 79-10 E_coliMS79-10-1.0.1_Cont71.1, whole genome shotgun sequence. [Escherichia coli MS 79-10]	18178	3220	11843	transposase	Escherichia_phage(33.33%)	6	NA	NA
Escherichia_coli_MS_79-10	ADWR01000079	ADWR01000079 Escherichia coli MS 79-10 E_coliMS79-10-1.0.1_Cont78.1, whole genome shotgun sequence. [Escherichia coli MS 79-10]	15332	142	15162	tail	Salmonella_phage(95.45%)	22	NA	NA
Escherichia_coli_MS_79-10	ADWR01000094	ADWR01000094 Escherichia coli MS 79-10 E_coliMS79-10-1.0.1_Cont93.1, whole genome shotgun sequence. [Escherichia coli MS 79-10]	10568	5312	10422	transposase,tail	Enterobacteria_phage(66.67%)	6	NA	NA
Escherichia_coli_MS_79-10	ADWR01000005	ADWR01000005 Escherichia coli MS 79-10 E_coliMS79-10-1.0.1_Cont4.1, whole genome shotgun sequence. [Escherichia coli MS 79-10]	148242	105944	112259		Escherichia_phage(50.0%)	6	NA	NA
Escherichia_coli_MS_79-10	ADWR01000005	ADWR01000005 Escherichia coli MS 79-10 E_coliMS79-10-1.0.1_Cont4.1, whole genome shotgun sequence. [Escherichia coli MS 79-10]	148242	131404	141420	tRNA	Mycoplasma_phage(14.29%)	12	NA	NA
Escherichia_coli_MS_79-10	ADWR01000053	ADWR01000053 Escherichia coli MS 79-10 E_coliMS79-10-1.0.1_Cont52.1, whole genome shotgun sequence. [Escherichia coli MS 79-10]	31047	9485	18927		Enterobacteria_phage(75.0%)	10	NA	NA
Escherichia_coli_MS_79-10	ADWR01000022	ADWR01000022 Escherichia coli MS 79-10 E_coliMS79-10-1.0.1_Cont21.1, whole genome shotgun sequence. [Escherichia coli MS 79-10]	69560	1610	14720		Cronobacter_phage(12.5%)	18	NA	NA
Escherichia_coli_MS_79-10	ADWR01000003	ADWR01000003 Escherichia coli MS 79-10 E_coliMS79-10-1.0.1_Cont2.1, whole genome shotgun sequence. [Escherichia coli MS 79-10]	169246	8545	19364		Hokovirus(14.29%)	11	NA	NA
Eggerthella_sp._HGA1	AEXR01000010	AEXR01000010 Eggerthella sp. HGA1 contig00035, whole genome shotgun sequence. [Eggerthella sp. HGA1]	49303	11235	20032		Enterobacteria_phage(42.86%)	7	NA	NA
Faecalibacterium_cf._prausnitzii_KLE1255	GL538342	GL538342 Faecalibacterium cf. prausnitzii KLE1255 genomic scaffold Scfld551, whole genome shotgun sequence. [Faecalibacterium cf. prausnitzii KLE1255]	268563	104949	113207	tRNA	Prochlorococcus_phage(33.33%)	8	NA	NA
Faecalibacterium_cf._prausnitzii_KLE1255	GL538347	GL538347 Faecalibacterium cf. prausnitzii KLE1255 genomic scaffold Scfld693, whole genome shotgun sequence. [Faecalibacterium cf. prausnitzii KLE1255]	28822	2858	28314		Faecalibacterium_phage(80.49%)	49	NA	NA
Faecalibacterium_cf._prausnitzii_KLE1255	GL538265	GL538265 Faecalibacterium cf. prausnitzii KLE1255 genomic scaffold Scfld70, whole genome shotgun sequence. [Faecalibacterium cf. prausnitzii KLE1255]	10248	56	10077		Lactococcus_phage(37.5%)	14	NA	NA
Faecalibacterium_cf._prausnitzii_KLE1255	GL538344	GL538344 Faecalibacterium cf. prausnitzii KLE1255 genomic scaffold Scfld597, whole genome shotgun sequence. [Faecalibacterium cf. prausnitzii KLE1255]	114818	30914	37834		Clostridium_phage(33.33%)	9	NA	NA
Faecalibacterium_cf._prausnitzii_KLE1255	GL538303	GL538303 Faecalibacterium cf. prausnitzii KLE1255 genomic scaffold Scfld201, whole genome shotgun sequence. [Faecalibacterium cf. prausnitzii KLE1255]	34724	297	34434	protease	Faecalibacterium_phage(92.5%)	44	NA	NA
Faecalibacterium_cf._prausnitzii_KLE1255	GL538315	GL538315 Faecalibacterium cf. prausnitzii KLE1255 genomic scaffold Scfld256, whole genome shotgun sequence. [Faecalibacterium cf. prausnitzii KLE1255]	279289	99026	105198		Faecalibacterium_phage(71.43%)	10	NA	NA
Faecalibacterium_cf._prausnitzii_KLE1255	GL538315	GL538315 Faecalibacterium cf. prausnitzii KLE1255 genomic scaffold Scfld256, whole genome shotgun sequence. [Faecalibacterium cf. prausnitzii KLE1255]	279289	124371	148212		Faecalibacterium_phage(25.0%)	30	NA	NA
Faecalibacterium_cf._prausnitzii_KLE1255	GL538351	GL538351 Faecalibacterium cf. prausnitzii KLE1255 genomic scaffold Scfld832, whole genome shotgun sequence. [Faecalibacterium cf. prausnitzii KLE1255]	55050	266	32268		Faecalibacterium_phage(75.0%)	52	NA	NA
Faecalibacterium_cf._prausnitzii_KLE1255	GL538341	GL538341 Faecalibacterium cf. prausnitzii KLE1255 genomic scaffold Scfld535, whole genome shotgun sequence. [Faecalibacterium cf. prausnitzii KLE1255]	146770	104159	112060		Staphylococcus_phage(50.0%)	8	NA	NA
Anaerotruncus_colihominis_DSM_17241	DS544171	DS544171 Anaerotruncus colihominis DSM 17241 Scfld_02_4 genomic scaffold, whole genome shotgun sequence. [Anaerotruncus colihominis DSM 17241]	158570	14858	24588		Enterobacteria_phage(50.0%)	8	NA	NA
Anaerotruncus_colihominis_DSM_17241	DS544186	DS544186 Anaerotruncus colihominis DSM 17241 Scfld_02_19 genomic scaffold, whole genome shotgun sequence. [Anaerotruncus colihominis DSM 17241]	260615	76344	121822	protease	Faecalibacterium_phage(48.89%)	64	NA	NA
Anaerotruncus_colihominis_DSM_17241	DS544177	DS544177 Anaerotruncus colihominis DSM 17241 Scfld_02_10 genomic scaffold, whole genome shotgun sequence. [Anaerotruncus colihominis DSM 17241]	249104	240892	249081		Streptococcus_phage(33.33%)	8	NA	NA
Anaerotruncus_colihominis_DSM_17241	DS544193	DS544193 Anaerotruncus colihominis DSM 17241 Scfld_02_26 genomic scaffold, whole genome shotgun sequence. [Anaerotruncus colihominis DSM 17241]	202215	125270	131535		Synechococcus_phage(50.0%)	7	NA	NA
Anaerotruncus_colihominis_DSM_17241	DS544185	DS544185 Anaerotruncus colihominis DSM 17241 Scfld_02_18 genomic scaffold, whole genome shotgun sequence. [Anaerotruncus colihominis DSM 17241]	444417	301707	310613	protease	Acinetobacter_phage(50.0%)	8	NA	NA
Anaerotruncus_colihominis_DSM_17241	DS544185	DS544185 Anaerotruncus colihominis DSM 17241 Scfld_02_18 genomic scaffold, whole genome shotgun sequence. [Anaerotruncus colihominis DSM 17241]	444417	361847	368119		Streptococcus_phage(28.57%)	9	NA	NA
Anaerotruncus_colihominis_DSM_17241	DS544183	DS544183 Anaerotruncus colihominis DSM 17241 Scfld_02_16 genomic scaffold, whole genome shotgun sequence. [Anaerotruncus colihominis DSM 17241]	282512	10013	31993	transposase	uncultured_Caudovirales_phage(15.79%)	45	NA	NA
Anaerotruncus_colihominis_DSM_17241	DS544182	DS544182 Anaerotruncus colihominis DSM 17241 Scfld_02_15 genomic scaffold, whole genome shotgun sequence. [Anaerotruncus colihominis DSM 17241]	52778	36226	48515		Clostridium_phage(63.64%)	19	NA	NA
Anaerotruncus_colihominis_DSM_17241	DS544174	DS544174 Anaerotruncus colihominis DSM 17241 Scfld_02_7 genomic scaffold, whole genome shotgun sequence. [Anaerotruncus colihominis DSM 17241]	126081	66728	110199	protease	Faecalibacterium_phage(83.33%)	62	NA	NA
Anaerotruncus_colihominis_DSM_17241	DS544175	DS544175 Anaerotruncus colihominis DSM 17241 Scfld_02_8 genomic scaffold, whole genome shotgun sequence. [Anaerotruncus colihominis DSM 17241]	307915	256517	278415		Clostridium_phage(42.11%)	29	NA	NA
Helicobacter_pylori_GAM268Bii	KB642619	KB642619 Helicobacter pylori GAM268Bii genomic scaffold Scfld119, whole genome shotgun sequence. [Helicobacter pylori GAM268Bii]	80985	40676	48901	tRNA	Ralstonia_phage(20.0%)	8	NA	NA
Helicobacter_pylori_GAM268Bii	KB642652	KB642652 Helicobacter pylori GAM268Bii genomic scaffold Scfld31, whole genome shotgun sequence. [Helicobacter pylori GAM268Bii]	5416	230	4097		Escherichia_phage(100.0%)	6	NA	NA
Bilophila_wadsworthia_3_1_6	KE150238	KE150238 Bilophila wadsworthia 3_1_6 genomic scaffold acCls-supercont2.1, whole genome shotgun sequence. [Bilophila wadsworthia 3_1_6]	3169074	1421	6156		Burkholderia_phage(66.67%)	7	NA	NA
Bilophila_wadsworthia_3_1_6	KE150238	KE150238 Bilophila wadsworthia 3_1_6 genomic scaffold acCls-supercont2.1, whole genome shotgun sequence. [Bilophila wadsworthia 3_1_6]	3169074	1096359	1128021		Rhizobium_phage(21.05%)	34	NA	NA
Bilophila_wadsworthia_3_1_6	KE150238	KE150238 Bilophila wadsworthia 3_1_6 genomic scaffold acCls-supercont2.1, whole genome shotgun sequence. [Bilophila wadsworthia 3_1_6]	3169074	2138658	2149795		Tupanvirus(16.67%)	9	NA	NA
Bilophila_wadsworthia_3_1_6	KE150238	KE150238 Bilophila wadsworthia 3_1_6 genomic scaffold acCls-supercont2.1, whole genome shotgun sequence. [Bilophila wadsworthia 3_1_6]	3169074	2490173	2504039	protease,tRNA	Staphylococcus_phage(50.0%)	12	NA	NA
Bilophila_wadsworthia_3_1_6	KE150238	KE150238 Bilophila wadsworthia 3_1_6 genomic scaffold acCls-supercont2.1, whole genome shotgun sequence. [Bilophila wadsworthia 3_1_6]	3169074	3002602	3010769		Escherichia_phage(33.33%)	8	NA	NA
Bilophila_wadsworthia_3_1_6	KE150238	KE150238 Bilophila wadsworthia 3_1_6 genomic scaffold acCls-supercont2.1, whole genome shotgun sequence. [Bilophila wadsworthia 3_1_6]	3169074	3097765	3106490		Thermobifida_phage(16.67%)	9	NA	NA
Bilophila_wadsworthia_3_1_6	KE150238	KE150238 Bilophila wadsworthia 3_1_6 genomic scaffold acCls-supercont2.1, whole genome shotgun sequence. [Bilophila wadsworthia 3_1_6]	3169074	3155384	3167526		Vibrio_phage(50.0%)	12	NA	NA
Bilophila_wadsworthia_3_1_6	KE150239	KE150239 Bilophila wadsworthia 3_1_6 genomic scaffold acCls-supercont2.2, whole genome shotgun sequence. [Bilophila wadsworthia 3_1_6]	766456	157483	166255		Thiobacimonas_phage(33.33%)	17	NA	NA
Bilophila_wadsworthia_3_1_6	KE150239	KE150239 Bilophila wadsworthia 3_1_6 genomic scaffold acCls-supercont2.2, whole genome shotgun sequence. [Bilophila wadsworthia 3_1_6]	766456	393993	424238		Pseudomonas_phage(19.05%)	41	NA	NA
Enterococcus_faecalis_TX2134	GL455577	GL455577 Enterococcus faecalis TX2134 genomic scaffold Scfld45, whole genome shotgun sequence. [Enterococcus faecalis TX2134]	16840	146	16710		Enterococcus_phage(100.0%)	33	NA	NA
Enterococcus_faecalis_TX2134	GL455593	GL455593 Enterococcus faecalis TX2134 genomic scaffold Scfld74, whole genome shotgun sequence. [Enterococcus faecalis TX2134]	79951	47776	68014		Streptococcus_phage(89.47%)	19	NA	NA
Enterococcus_faecalis_TX2134	GL455604	GL455604 Enterococcus faecalis TX2134 genomic scaffold Scfld108, whole genome shotgun sequence. [Enterococcus faecalis TX2134]	307409	15445	22155		Enterococcus_phage(33.33%)	7	NA	NA
Enterococcus_faecalis_TX2134	GL455604	GL455604 Enterococcus faecalis TX2134 genomic scaffold Scfld108, whole genome shotgun sequence. [Enterococcus faecalis TX2134]	307409	99769	155096	tRNA,protease,transposase	Streptococcus_phage(62.5%)	59	NA	NA
Enterococcus_faecalis_TX2134	GL455604	GL455604 Enterococcus faecalis TX2134 genomic scaffold Scfld108, whole genome shotgun sequence. [Enterococcus faecalis TX2134]	307409	202098	210743		Synechococcus_phage(50.0%)	9	NA	NA
Enterococcus_faecalis_TX2134	GL455603	GL455603 Enterococcus faecalis TX2134 genomic scaffold Scfld106, whole genome shotgun sequence. [Enterococcus faecalis TX2134]	222270	44270	52192	transposase	Planktothrix_phage(33.33%)	11	NA	NA
Enterococcus_faecalis_TX2134	GL455603	GL455603 Enterococcus faecalis TX2134 genomic scaffold Scfld106, whole genome shotgun sequence. [Enterococcus faecalis TX2134]	222270	99557	135384		Enterococcus_phage(80.85%)	56	NA	NA
Enterococcus_faecalis_TX2134	GL455622	GL455622 Enterococcus faecalis TX2134 genomic scaffold Scfld182, whole genome shotgun sequence. [Enterococcus faecalis TX2134]	274467	247884	258797		Streptococcus_phage(50.0%)	12	NA	NA
Enterococcus_faecalis_TX2134	GL455609	GL455609 Enterococcus faecalis TX2134 genomic scaffold Scfld122, whole genome shotgun sequence. [Enterococcus faecalis TX2134]	198170	41299	53325		Enterococcus_phage(40.0%)	13	NA	NA
Enterococcus_faecalis_TX2134	GL455609	GL455609 Enterococcus faecalis TX2134 genomic scaffold Scfld122, whole genome shotgun sequence. [Enterococcus faecalis TX2134]	198170	58849	77879		Enterococcus_phage(77.27%)	28	NA	NA
Enterococcus_faecalis_TX2134	GL455609	GL455609 Enterococcus faecalis TX2134 genomic scaffold Scfld122, whole genome shotgun sequence. [Enterococcus faecalis TX2134]	198170	117864	136152		Enterococcus_phage(44.44%)	14	NA	NA
Enterococcus_faecalis_TX2134	GL455609	GL455609 Enterococcus faecalis TX2134 genomic scaffold Scfld122, whole genome shotgun sequence. [Enterococcus faecalis TX2134]	198170	145659	160671		Enterococcus_phage(50.0%)	29	NA	NA
Enterococcus_faecalis_TX2134	GL455636	GL455636 Enterococcus faecalis TX2134 genomic scaffold Scfld313, whole genome shotgun sequence. [Enterococcus faecalis TX2134]	205350	158661	179080	tRNA	Enterococcus_phage(41.18%)	25	NA	NA
Enterococcus_faecalis_TX2134	GL455607	GL455607 Enterococcus faecalis TX2134 genomic scaffold Scfld112, whole genome shotgun sequence. [Enterococcus faecalis TX2134]	6275	214	6189		Enterococcus_phage(100.0%)	6	NA	NA
Bifidobacterium_gallicum_DSM_20093_=_LMG_11596	ABXB03000002	ABXB03000002 Bifidobacterium gallicum DSM 20093 = LMG 11596 strain DSM 20093 B_gallicum-1.0.1_Cont1.1, whole genome shotgun sequence. [Bifidobacterium gallicum DSM 20093 = LMG 11596]	497363	294617	302544		Bacillus_phage(33.33%)	8	NA	NA
Bifidobacterium_gallicum_DSM_20093_=_LMG_11596	ABXB03000001	ABXB03000001 Bifidobacterium gallicum DSM 20093 = LMG 11596 strain DSM 20093 B_gallicum-1.0.1_Cont0.1, whole genome shotgun sequence. [Bifidobacterium gallicum DSM 20093 = LMG 11596]	553342	286961	292598		Mycobacterium_phage(33.33%)	11	NA	NA
Ruminiclostridium_Clostridium_methylpentosum_DSM_5476	EQ973340	EQ973340 Clostridium methylpentosum DSM 5476 Scfld2 genomic scaffold, whole genome shotgun sequence. [Ruminiclostridium [Clostridium] methylpentosum DSM 5476]	144869	107951	119001		Bacillus_phage(11.11%)	15	NA	NA
Ruminiclostridium_Clostridium_methylpentosum_DSM_5476	EQ973340	EQ973340 Clostridium methylpentosum DSM 5476 Scfld2 genomic scaffold, whole genome shotgun sequence. [Ruminiclostridium [Clostridium] methylpentosum DSM 5476]	144869	128497	140771		uncultured_Caudovirales_phage(37.5%)	13	NA	NA
Ruminiclostridium_Clostridium_methylpentosum_DSM_5476	EQ973339	EQ973339 Clostridium methylpentosum DSM 5476 Scfld1 genomic scaffold, whole genome shotgun sequence. [Ruminiclostridium [Clostridium] methylpentosum DSM 5476]	584008	64446	71970		Lactobacillus_phage(50.0%)	10	NA	NA
Ruminiclostridium_Clostridium_methylpentosum_DSM_5476	EQ973338	EQ973338 Clostridium methylpentosum DSM 5476 Scfld0 genomic scaffold, whole genome shotgun sequence. [Ruminiclostridium [Clostridium] methylpentosum DSM 5476]	779329	112176	119761		Enterobacteria_phage(33.33%)	7	NA	NA
Ruminiclostridium_Clostridium_methylpentosum_DSM_5476	EQ973338	EQ973338 Clostridium methylpentosum DSM 5476 Scfld0 genomic scaffold, whole genome shotgun sequence. [Ruminiclostridium [Clostridium] methylpentosum DSM 5476]	779329	215143	222328		Prochlorococcus_phage(66.67%)	7	NA	NA
Ruminiclostridium_Clostridium_methylpentosum_DSM_5476	EQ973343	EQ973343 Clostridium methylpentosum DSM 5476 Scfld5 genomic scaffold, whole genome shotgun sequence. [Ruminiclostridium [Clostridium] methylpentosum DSM 5476]	341270	321004	333023		Streptococcus_phage(100.0%)	12	NA	NA
Ruminiclostridium_Clostridium_methylpentosum_DSM_5476	EQ973344	EQ973344 Clostridium methylpentosum DSM 5476 Scfld6 genomic scaffold, whole genome shotgun sequence. [Ruminiclostridium [Clostridium] methylpentosum DSM 5476]	1560487	694671	768526	protease,transposase	Bacillus_phage(25.0%)	41	NA	NA
Enterococcus_faecalis_TX1341	GL457185	GL457185 Enterococcus faecalis TX1341 genomic scaffold Scfld135, whole genome shotgun sequence. [Enterococcus faecalis TX1341]	218396	132821	140741	transposase	Planktothrix_phage(33.33%)	11	NA	NA
Enterococcus_faecalis_TX1341	GL457196	GL457196 Enterococcus faecalis TX1341 genomic scaffold Scfld416, whole genome shotgun sequence. [Enterococcus faecalis TX1341]	275423	161164	181583	tRNA	Enterococcus_phage(40.0%)	24	NA	NA
Enterococcus_faecalis_TX1341	GL457187	GL457187 Enterococcus faecalis TX1341 genomic scaffold Scfld179, whole genome shotgun sequence. [Enterococcus faecalis TX1341]	158168	141654	148505		Enterococcus_phage(33.33%)	7	NA	NA
Enterococcus_faecalis_TX1341	GL457165	GL457165 Enterococcus faecalis TX1341 genomic scaffold Scfld19, whole genome shotgun sequence. [Enterococcus faecalis TX1341]	245932	1961	26965		Enterococcus_phage(34.62%)	30	NA	NA
Enterococcus_faecalis_TX1341	GL457170	GL457170 Enterococcus faecalis TX1341 genomic scaffold Scfld34, whole genome shotgun sequence. [Enterococcus faecalis TX1341]	124992	673	7471	integrase	Enterococcus_phage(60.0%)	14	4000:4014	11459:11473
Enterococcus_faecalis_TX1341	GL457170	GL457170 Enterococcus faecalis TX1341 genomic scaffold Scfld34, whole genome shotgun sequence. [Enterococcus faecalis TX1341]	124992	98729	109642		Streptococcus_phage(50.0%)	12	NA	NA
Enterococcus_faecalis_TX1341	GL457171	GL457171 Enterococcus faecalis TX1341 genomic scaffold Scfld35, whole genome shotgun sequence. [Enterococcus faecalis TX1341]	139557	114128	139046		Enterococcus_phage(69.57%)	28	NA	NA
Enterococcus_faecalis_TX1341	GL457193	GL457193 Enterococcus faecalis TX1341 genomic scaffold Scfld273, whole genome shotgun sequence. [Enterococcus faecalis TX1341]	324088	77861	88614		Enterococcus_phage(61.54%)	20	NA	NA
Enterococcus_faecalis_TX1341	GL457193	GL457193 Enterococcus faecalis TX1341 genomic scaffold Scfld273, whole genome shotgun sequence. [Enterococcus faecalis TX1341]	324088	102755	114709		Lactococcus_phage(33.33%)	13	NA	NA
Enterococcus_faecalis_TX1341	GL457193	GL457193 Enterococcus faecalis TX1341 genomic scaffold Scfld273, whole genome shotgun sequence. [Enterococcus faecalis TX1341]	324088	271117	279761		Synechococcus_phage(50.0%)	9	NA	NA
Enterococcus_faecalis_TX1341	GL457193	GL457193 Enterococcus faecalis TX1341 genomic scaffold Scfld273, whole genome shotgun sequence. [Enterococcus faecalis TX1341]	324088	317125	323535	integrase,tRNA	Enterococcus_phage(50.0%)	14	306566:306581	321808:321823
Bacteroides_caccae_ATCC_43185	AAVM02000003	AAVM02000003 Bacteroides caccae ATCC 43185 B_caccae-MSIQ_Cont1328, whole genome shotgun sequence. [Bacteroides caccae ATCC 43185]	500031	108855	117560		Arthrobacter_phage(16.67%)	8	NA	NA
Bacteroides_caccae_ATCC_43185	AAVM02000004	AAVM02000004 Bacteroides caccae ATCC 43185 B_caccae-MSIQ_Cont60, whole genome shotgun sequence. [Bacteroides caccae ATCC 43185]	431883	17808	27120		Liberibacter_phage(66.67%)	6	NA	NA
Bacteroides_caccae_ATCC_43185	AAVM02000001	AAVM02000001 Bacteroides caccae ATCC 43185 B_caccae-MSIQ_Cont1321, whole genome shotgun sequence. [Bacteroides caccae ATCC 43185]	1329168	1293421	1301350		Riemerella_phage(33.33%)	12	NA	NA
Bacteroides_caccae_ATCC_43185	AAVM02000001	AAVM02000001 Bacteroides caccae ATCC 43185 B_caccae-MSIQ_Cont1321, whole genome shotgun sequence. [Bacteroides caccae ATCC 43185]	1329168	1308634	1316344		Bacillus_phage(16.67%)	14	NA	NA
Bacteroides_sp._3_1_33FAA	GG705237	GG705237 Bacteroides sp. 3_1_33FAA genomic scaffold supercont1.11, whole genome shotgun sequence. [Bacteroides sp. 3_1_33FAA]	154103	108500	120390		Lactobacillus_phage(16.67%)	17	NA	NA
Bacteroides_sp._3_1_33FAA	GG705236	GG705236 Bacteroides sp. 3_1_33FAA genomic scaffold supercont1.10, whole genome shotgun sequence. [Bacteroides sp. 3_1_33FAA]	182997	75799	84354		Listeria_phage(16.67%)	8	NA	NA
Helicobacter_pylori_HP250AFiV	KB642763	KB642763 Helicobacter pylori HP250AFiV genomic scaffold Scfld5, whole genome shotgun sequence. [Helicobacter pylori HP250AFiV]	5418	193	5292		Escherichia_phage(100.0%)	7	NA	NA
Helicobacter_pylori_HP250AFiV	KB642762	KB642762 Helicobacter pylori HP250AFiV genomic scaffold Scfld41, whole genome shotgun sequence. [Helicobacter pylori HP250AFiV]	99246	27505	38405		uncultured_Caudovirales_phage(33.33%)	10	NA	NA
Bifidobacterium_breve_HPH0326	KE150453	KE150453 Bifidobacterium breve HPH0326 genomic scaffold acArz-supercont1.1, whole genome shotgun sequence. [Bifidobacterium breve HPH0326]	939043	219313	231690	tRNA	uncultured_Mediterranean_phage(33.33%)	7	NA	NA
Bifidobacterium_breve_HPH0326	KE150453	KE150453 Bifidobacterium breve HPH0326 genomic scaffold acArz-supercont1.1, whole genome shotgun sequence. [Bifidobacterium breve HPH0326]	939043	464285	477155		Mycobacterium_phage(30.0%)	17	NA	NA
Bifidobacterium_breve_HPH0326	KE150453	KE150453 Bifidobacterium breve HPH0326 genomic scaffold acArz-supercont1.1, whole genome shotgun sequence. [Bifidobacterium breve HPH0326]	939043	482452	490161		Bifidobacterium_phage(33.33%)	10	NA	NA
Bifidobacterium_breve_HPH0326	KE150455	KE150455 Bifidobacterium breve HPH0326 genomic scaffold acArz-supercont1.3, whole genome shotgun sequence. [Bifidobacterium breve HPH0326]	595601	431336	451109		Bifidobacterium_phage(55.56%)	31	NA	NA
Lactobacillus_reuteri_MM4-1A	ACGX02000005	ACGX02000005 Lactobacillus reuteri MM4-1A Contig21725, whole genome shotgun sequence. [Lactobacillus reuteri MM4-1A]	323681	68016	75910	tRNA,transposase	Streptococcus_phage(50.0%)	9	NA	NA
Lactobacillus_reuteri_MM4-1A	ACGX02000005	ACGX02000005 Lactobacillus reuteri MM4-1A Contig21725, whole genome shotgun sequence. [Lactobacillus reuteri MM4-1A]	323681	116970	127508	transposase,protease	Streptococcus_phage(33.33%)	9	NA	NA
Lactobacillus_reuteri_MM4-1A	ACGX02000006	ACGX02000006 Lactobacillus reuteri MM4-1A Contig21738, whole genome shotgun sequence. [Lactobacillus reuteri MM4-1A]	464241	196518	210028		Lactobacillus_phage(75.0%)	13	NA	NA
Lactobacillus_reuteri_MM4-1A	ACGX02000006	ACGX02000006 Lactobacillus reuteri MM4-1A Contig21738, whole genome shotgun sequence. [Lactobacillus reuteri MM4-1A]	464241	230182	239671		Lactobacillus_phage(66.67%)	18	NA	NA
Lactobacillus_reuteri_MM4-1A	ACGX02000006	ACGX02000006 Lactobacillus reuteri MM4-1A Contig21738, whole genome shotgun sequence. [Lactobacillus reuteri MM4-1A]	464241	262474	270539	protease	Staphylococcus_phage(33.33%)	8	NA	NA
Lactobacillus_reuteri_MM4-1A	ACGX02000006	ACGX02000006 Lactobacillus reuteri MM4-1A Contig21738, whole genome shotgun sequence. [Lactobacillus reuteri MM4-1A]	464241	327087	336102	integrase	Lactobacillus_phage(42.86%)	10	324683:324697	335372:335386
Lactobacillus_reuteri_MM4-1A	ACGX02000006	ACGX02000006 Lactobacillus reuteri MM4-1A Contig21738, whole genome shotgun sequence. [Lactobacillus reuteri MM4-1A]	464241	366045	378683		Staphylococcus_phage(30.0%)	17	NA	NA
Lactobacillus_reuteri_MM4-1A	ACGX02000004	ACGX02000004 Lactobacillus reuteri MM4-1A Contig21723, whole genome shotgun sequence. [Lactobacillus reuteri MM4-1A]	136851	1053	9441	transposase	Bacillus_virus(50.0%)	8	NA	NA
Lactobacillus_reuteri_MM4-1A	ACGX02000007	ACGX02000007 Lactobacillus reuteri MM4-1A Contig21740, whole genome shotgun sequence. [Lactobacillus reuteri MM4-1A]	990100	5656	14234		Lactobacillus_prophage(33.33%)	14	NA	NA
Lactobacillus_reuteri_MM4-1A	ACGX02000007	ACGX02000007 Lactobacillus reuteri MM4-1A Contig21740, whole genome shotgun sequence. [Lactobacillus reuteri MM4-1A]	990100	194555	228695	transposase,protease	Bacillus_phage(18.18%)	30	NA	NA
Lactobacillus_reuteri_MM4-1A	ACGX02000007	ACGX02000007 Lactobacillus reuteri MM4-1A Contig21740, whole genome shotgun sequence. [Lactobacillus reuteri MM4-1A]	990100	974692	986746		Synechococcus_phage(25.0%)	11	NA	NA
Lactobacillus_reuteri_MM4-1A	ACGX02000002	ACGX02000002 Lactobacillus reuteri MM4-1A Contig21703, whole genome shotgun sequence. [Lactobacillus reuteri MM4-1A]	41971	6537	40109	protease,transposase	Lactobacillus_phage(65.52%)	39	NA	NA
Lactobacillus_reuteri_MM4-1A	ACGX02000003	ACGX02000003 Lactobacillus reuteri MM4-1A Contig21713, whole genome shotgun sequence. [Lactobacillus reuteri MM4-1A]	92206	463	11293	transposase	Lactobacillus_phage(42.86%)	14	NA	NA
Bilophila_sp._4_1_30	JH114231	JH114231 Bilophila sp. 4_1_30 genomic scaffold supercont1.1, whole genome shotgun sequence. [Bilophila sp. 4_1_30]	1497996	530527	538695		Escherichia_phage(33.33%)	8	NA	NA
Bilophila_sp._4_1_30	JH114233	JH114233 Bilophila sp. 4_1_30 genomic scaffold supercont1.3, whole genome shotgun sequence. [Bilophila sp. 4_1_30]	984830	114240	119110		Rhodococcus_phage(16.67%)	9	NA	NA
Bilophila_sp._4_1_30	JH114233	JH114233 Bilophila sp. 4_1_30 genomic scaffold supercont1.3, whole genome shotgun sequence. [Bilophila sp. 4_1_30]	984830	593329	606587		Azospirillum_phage(25.0%)	13	NA	NA
Bilophila_sp._4_1_30	JH114232	JH114232 Bilophila sp. 4_1_30 genomic scaffold supercont1.2, whole genome shotgun sequence. [Bilophila sp. 4_1_30]	1254499	141867	155765		Pseudomonas_phage(30.0%)	14	NA	NA
Bilophila_sp._4_1_30	JH114232	JH114232 Bilophila sp. 4_1_30 genomic scaffold supercont1.2, whole genome shotgun sequence. [Bilophila sp. 4_1_30]	1254499	211923	241027	tRNA	Pseudomonas_phage(43.33%)	37	NA	NA
Bilophila_sp._4_1_30	JH114232	JH114232 Bilophila sp. 4_1_30 genomic scaffold supercont1.2, whole genome shotgun sequence. [Bilophila sp. 4_1_30]	1254499	253464	261689		Pseudomonas_phage(50.0%)	10	NA	NA
Bilophila_sp._4_1_30	JH114235	JH114235 Bilophila sp. 4_1_30 genomic scaffold supercont1.5, whole genome shotgun sequence. [Bilophila sp. 4_1_30]	200200	145992	179536		Burkholderia_phage(22.22%)	51	NA	NA
Bilophila_sp._4_1_30	JH114236	JH114236 Bilophila sp. 4_1_30 genomic scaffold supercont1.6, whole genome shotgun sequence. [Bilophila sp. 4_1_30]	142047	90636	102550	tRNA	Staphylococcus_phage(44.44%)	11	NA	NA
Megamonas_funiformis_YIT_11815	JH601090	JH601090 Megamonas funiformis YIT 11815 genomic scaffold supercont1.1, whole genome shotgun sequence. [Megamonas funiformis YIT 11815]	1636111	355770	367632		unidentified_phage(22.22%)	15	NA	NA
Megamonas_funiformis_YIT_11815	JH601090	JH601090 Megamonas funiformis YIT 11815 genomic scaffold supercont1.1, whole genome shotgun sequence. [Megamonas funiformis YIT 11815]	1636111	412835	442749		Clostridium_phage(75.0%)	32	NA	NA
Megamonas_funiformis_YIT_11815	JH601090	JH601090 Megamonas funiformis YIT 11815 genomic scaffold supercont1.1, whole genome shotgun sequence. [Megamonas funiformis YIT 11815]	1636111	518997	523749		Clostridium_phage(28.57%)	11	NA	NA
Megamonas_funiformis_YIT_11815	JH601090	JH601090 Megamonas funiformis YIT 11815 genomic scaffold supercont1.1, whole genome shotgun sequence. [Megamonas funiformis YIT 11815]	1636111	573997	581217		Synechococcus_phage(28.57%)	8	NA	NA
Megamonas_funiformis_YIT_11815	JH601090	JH601090 Megamonas funiformis YIT 11815 genomic scaffold supercont1.1, whole genome shotgun sequence. [Megamonas funiformis YIT 11815]	1636111	712964	735690		Pseudomonas_phage(33.33%)	27	NA	NA
Megamonas_funiformis_YIT_11815	JH601090	JH601090 Megamonas funiformis YIT 11815 genomic scaffold supercont1.1, whole genome shotgun sequence. [Megamonas funiformis YIT 11815]	1636111	741766	758764	integrase	Lactobacillus_phage(18.18%)	23	738432:738447	754828:754843
Megamonas_funiformis_YIT_11815	JH601090	JH601090 Megamonas funiformis YIT 11815 genomic scaffold supercont1.1, whole genome shotgun sequence. [Megamonas funiformis YIT 11815]	1636111	891891	915994		Bacillus_phage(40.0%)	26	NA	NA
Megamonas_funiformis_YIT_11815	JH601090	JH601090 Megamonas funiformis YIT 11815 genomic scaffold supercont1.1, whole genome shotgun sequence. [Megamonas funiformis YIT 11815]	1636111	1243291	1250893	integrase	Streptococcus_phage(16.67%)	11	1240292:1240334	1250955:1250997
Megamonas_funiformis_YIT_11815	JH601090	JH601090 Megamonas funiformis YIT 11815 genomic scaffold supercont1.1, whole genome shotgun sequence. [Megamonas funiformis YIT 11815]	1636111	1274607	1281912		Staphylococcus_phage(57.14%)	9	NA	NA
Megamonas_funiformis_YIT_11815	JH601093	JH601093 Megamonas funiformis YIT 11815 genomic scaffold supercont1.4, whole genome shotgun sequence. [Megamonas funiformis YIT 11815]	155160	58367	67380		Streptococcus_phage(33.33%)	9	NA	NA
Megamonas_funiformis_YIT_11815	JH601091	JH601091 Megamonas funiformis YIT 11815 genomic scaffold supercont1.2, whole genome shotgun sequence. [Megamonas funiformis YIT 11815]	331109	324170	330701	transposase	Tupanvirus(33.33%)	7	NA	NA
Enterococcus_faecalis_TX1322	GG669017	GG669017 Enterococcus faecalis TX1322 genomic scaffold SCAFFOLD1, whole genome shotgun sequence. [Enterococcus faecalis TX1322]	1477509	59017	69930		Streptococcus_phage(50.0%)	12	NA	NA
Enterococcus_faecalis_TX1322	GG669017	GG669017 Enterococcus faecalis TX1322 genomic scaffold SCAFFOLD1, whole genome shotgun sequence. [Enterococcus faecalis TX1322]	1477509	602843	622302		Enterococcus_phage(78.26%)	28	NA	NA
Enterococcus_faecalis_TX1322	GG669017	GG669017 Enterococcus faecalis TX1322 genomic scaffold SCAFFOLD1, whole genome shotgun sequence. [Enterococcus faecalis TX1322]	1477509	629592	641574		Lactococcus_phage(30.0%)	14	NA	NA
Enterococcus_faecalis_TX1322	GG669017	GG669017 Enterococcus faecalis TX1322 genomic scaffold SCAFFOLD1, whole genome shotgun sequence. [Enterococcus faecalis TX1322]	1477509	728526	736048		Streptococcus_phage(83.33%)	10	NA	NA
Enterococcus_faecalis_TX1322	GG669017	GG669017 Enterococcus faecalis TX1322 genomic scaffold SCAFFOLD1, whole genome shotgun sequence. [Enterococcus faecalis TX1322]	1477509	810305	818949		Synechococcus_phage(50.0%)	9	NA	NA
Enterococcus_faecalis_TX1322	GG669017	GG669017 Enterococcus faecalis TX1322 genomic scaffold SCAFFOLD1, whole genome shotgun sequence. [Enterococcus faecalis TX1322]	1477509	1238440	1259045	tRNA	Enterococcus_phage(37.5%)	24	NA	NA
Enterococcus_faecalis_TX1322	GG669023	GG669023 Enterococcus faecalis TX1322 genomic scaffold SCAFFOLD7, whole genome shotgun sequence. [Enterococcus faecalis TX1322]	29521	992	29358		Enterococcus_phage(100.0%)	42	NA	NA
Enterococcus_faecalis_TX1322	GG669020	GG669020 Enterococcus faecalis TX1322 genomic scaffold SCAFFOLD4, whole genome shotgun sequence. [Enterococcus faecalis TX1322]	225897	75152	82003		Enterococcus_phage(33.33%)	7	NA	NA
Enterococcus_faecalis_TX1322	GG669018	GG669018 Enterococcus faecalis TX1322 genomic scaffold SCAFFOLD2, whole genome shotgun sequence. [Enterococcus faecalis TX1322]	619863	59592	68978	protease,transposase	Streptococcus_phage(66.67%)	7	NA	NA
Enterococcus_faecalis_TX1322	GG669018	GG669018 Enterococcus faecalis TX1322 genomic scaffold SCAFFOLD2, whole genome shotgun sequence. [Enterococcus faecalis TX1322]	619863	76681	85474	transposase	Bacillus_phage(50.0%)	9	NA	NA
Enterococcus_faecalis_TX1322	GG669018	GG669018 Enterococcus faecalis TX1322 genomic scaffold SCAFFOLD2, whole genome shotgun sequence. [Enterococcus faecalis TX1322]	619863	325140	344892	protease	Streptococcus_phage(94.12%)	19	NA	NA
Enterococcus_faecalis_TX1322	GG669018	GG669018 Enterococcus faecalis TX1322 genomic scaffold SCAFFOLD2, whole genome shotgun sequence. [Enterococcus faecalis TX1322]	619863	479819	487739	transposase	Planktothrix_phage(33.33%)	11	NA	NA
Fusobacterium_ulcerans_12-1B	KE161008	KE161008 Fusobacterium sp. 12_1B genomic scaffold supercont2.2, whole genome shotgun sequence. [Fusobacterium ulcerans 12-1B]	659997	591680	600128	protease	Geobacillus_virus(42.86%)	11	NA	NA
Fusobacterium_ulcerans_12-1B	KE161010	KE161010 Fusobacterium sp. 12_1B genomic scaffold supercont2.4, whole genome shotgun sequence. [Fusobacterium ulcerans 12-1B]	319867	311263	318961	tRNA,transposase	Klosneuvirus(16.67%)	7	NA	NA
Fusobacterium_ulcerans_12-1B	KE161007	KE161007 Fusobacterium sp. 12_1B genomic scaffold supercont2.1, whole genome shotgun sequence. [Fusobacterium ulcerans 12-1B]	1856764	625008	633891	protease	Fusobacterium_phage(66.67%)	8	NA	NA
Fusobacterium_ulcerans_12-1B	KE161007	KE161007 Fusobacterium sp. 12_1B genomic scaffold supercont2.1, whole genome shotgun sequence. [Fusobacterium ulcerans 12-1B]	1856764	738730	745711		Enterobacteria_phage(42.86%)	8	NA	NA
Fusobacterium_ulcerans_12-1B	KE161007	KE161007 Fusobacterium sp. 12_1B genomic scaffold supercont2.1, whole genome shotgun sequence. [Fusobacterium ulcerans 12-1B]	1856764	1579600	1589136		Prochlorococcus_phage(28.57%)	7	NA	NA
Fusobacterium_ulcerans_12-1B	KE161009	KE161009 Fusobacterium sp. 12_1B genomic scaffold supercont2.3, whole genome shotgun sequence. [Fusobacterium ulcerans 12-1B]	488539	54591	72692	protease	Fusobacterium_phage(95.24%)	23	NA	NA
Fusobacterium_ulcerans_12-1B	KE161009	KE161009 Fusobacterium sp. 12_1B genomic scaffold supercont2.3, whole genome shotgun sequence. [Fusobacterium ulcerans 12-1B]	488539	282509	293090		Staphylococcus_phage(30.0%)	17	NA	NA
Streptomyces_sp._HPH0547	KE150472	KE150472 Streptomyces sp. HPH0547 genomic scaffold aczHZ-supercont1.2, whole genome shotgun sequence. [Streptomyces sp. HPH0547]	2855569	746493	755783		Streptomyces_phage(37.5%)	14	NA	NA
Streptomyces_sp._HPH0547	KE150472	KE150472 Streptomyces sp. HPH0547 genomic scaffold aczHZ-supercont1.2, whole genome shotgun sequence. [Streptomyces sp. HPH0547]	2855569	771317	777836		Streptomyces_phage(50.0%)	7	NA	NA
Faecalibacterium_prausnitzii_SL3_3	FP929046	FP929046 Faecalibacterium prausnitzii SL3/3 draft genome. [Faecalibacterium prausnitzii SL3/3]	3214418	824777	831544		Streptococcus_phage(33.33%)	8	NA	NA
Faecalibacterium_prausnitzii_SL3_3	FP929046	FP929046 Faecalibacterium prausnitzii SL3/3 draft genome. [Faecalibacterium prausnitzii SL3/3]	3214418	2348195	2355908		Geobacillus_virus(66.67%)	7	NA	NA
Faecalibacterium_prausnitzii_SL3_3	FP929046	FP929046 Faecalibacterium prausnitzii SL3/3 draft genome. [Faecalibacterium prausnitzii SL3/3]	3214418	2381324	2390225		Streptococcus_phage(28.57%)	10	NA	NA
Faecalibacterium_prausnitzii_SL3_3	FP929046	FP929046 Faecalibacterium prausnitzii SL3/3 draft genome. [Faecalibacterium prausnitzii SL3/3]	3214418	2696639	2745208	protease	Faecalibacterium_phage(74.36%)	69	NA	NA
Clostridiales_bacterium_1_7_47FAA	DS990261	DS990261 Clostridiales bacterium 1_7_47_FAA supercont2.2 genomic scaffold, whole genome shotgun sequence. [Clostridiales bacterium 1_7_47FAA]	1264802	853088	890105	protease,transposase	unidentified_phage(65.38%)	46	NA	NA
Clostridiales_bacterium_1_7_47FAA	DS990263	DS990263 Clostridiales bacterium 1_7_47_FAA supercont2.4 genomic scaffold, whole genome shotgun sequence. [Clostridiales bacterium 1_7_47FAA]	730799	516794	525231		Bacillus_phage(71.43%)	8	NA	NA
Clostridiales_bacterium_1_7_47FAA	DS990260	DS990260 Clostridiales bacterium 1_7_47_FAA supercont2.1 genomic scaffold, whole genome shotgun sequence. [Clostridiales bacterium 1_7_47FAA]	3013027	1395963	1402772		Staphylococcus_phage(50.0%)	6	NA	NA
Clostridiales_bacterium_1_7_47FAA	DS990260	DS990260 Clostridiales bacterium 1_7_47_FAA supercont2.1 genomic scaffold, whole genome shotgun sequence. [Clostridiales bacterium 1_7_47FAA]	3013027	1581453	1597799		Faecalibacterium_phage(62.5%)	22	NA	NA
Clostridiales_bacterium_1_7_47FAA	DS990260	DS990260 Clostridiales bacterium 1_7_47_FAA supercont2.1 genomic scaffold, whole genome shotgun sequence. [Clostridiales bacterium 1_7_47FAA]	3013027	2403755	2411952		Staphylococcus_phage(16.67%)	9	NA	NA
Clostridiales_bacterium_1_7_47FAA	DS990266	DS990266 Clostridiales bacterium 1_7_47_FAA supercont2.7 genomic scaffold, whole genome shotgun sequence. [Clostridiales bacterium 1_7_47FAA]	55423	16984	25961		Bacillus_phage(50.0%)	7	NA	NA
Clostridiales_bacterium_1_7_47FAA	DS990264	DS990264 Clostridiales bacterium 1_7_47_FAA supercont2.5 genomic scaffold, whole genome shotgun sequence. [Clostridiales bacterium 1_7_47FAA]	245113	89419	96178	transposase	Synechococcus_phage(33.33%)	7	NA	NA
Erysipelotrichaceae_bacterium_6_1_45	JH590973	JH590973 Erysipelotrichaceae bacterium 6_1_45 genomic scaffold supercont1.6, whole genome shotgun sequence. [Erysipelotrichaceae bacterium 6_1_45]	243394	28576	36332		Staphylococcus_phage(66.67%)	6	NA	NA
Erysipelotrichaceae_bacterium_6_1_45	JH590973	JH590973 Erysipelotrichaceae bacterium 6_1_45 genomic scaffold supercont1.6, whole genome shotgun sequence. [Erysipelotrichaceae bacterium 6_1_45]	243394	229572	236388		Staphylococcus_phage(28.57%)	11	NA	NA
Erysipelotrichaceae_bacterium_6_1_45	JH590970	JH590970 Erysipelotrichaceae bacterium 6_1_45 genomic scaffold supercont1.3, whole genome shotgun sequence. [Erysipelotrichaceae bacterium 6_1_45]	1131447	361	15533		Clostridium_phage(57.14%)	18	NA	NA
Erysipelotrichaceae_bacterium_6_1_45	JH590970	JH590970 Erysipelotrichaceae bacterium 6_1_45 genomic scaffold supercont1.3, whole genome shotgun sequence. [Erysipelotrichaceae bacterium 6_1_45]	1131447	945578	953262		Clostridium_phage(33.33%)	6	NA	NA
Erysipelotrichaceae_bacterium_6_1_45	JH590974	JH590974 Erysipelotrichaceae bacterium 6_1_45 genomic scaffold supercont1.7, whole genome shotgun sequence. [Erysipelotrichaceae bacterium 6_1_45]	19746	7880	18619		Clostridium_phage(91.67%)	16	NA	NA
Erysipelotrichaceae_bacterium_6_1_45	JH590975	JH590975 Erysipelotrichaceae bacterium 6_1_45 genomic scaffold supercont1.8, whole genome shotgun sequence. [Erysipelotrichaceae bacterium 6_1_45]	13454	1127	11700		Clostridium_phage(91.67%)	16	NA	NA
Erysipelotrichaceae_bacterium_6_1_45	JH590969	JH590969 Erysipelotrichaceae bacterium 6_1_45 genomic scaffold supercont1.2, whole genome shotgun sequence. [Erysipelotrichaceae bacterium 6_1_45]	1207646	713545	722644	holin	Escherichia_phage(16.67%)	9	NA	NA
Erysipelotrichaceae_bacterium_6_1_45	JH590969	JH590969 Erysipelotrichaceae bacterium 6_1_45 genomic scaffold supercont1.2, whole genome shotgun sequence. [Erysipelotrichaceae bacterium 6_1_45]	1207646	911738	953504	protease	Erysipelothrix_phage(55.56%)	51	NA	NA
Erysipelotrichaceae_bacterium_6_1_45	JH590969	JH590969 Erysipelotrichaceae bacterium 6_1_45 genomic scaffold supercont1.2, whole genome shotgun sequence. [Erysipelotrichaceae bacterium 6_1_45]	1207646	1117382	1133237	transposase	Streptococcus_phage(66.67%)	16	NA	NA
Erysipelotrichaceae_bacterium_6_1_45	JH590968	JH590968 Erysipelotrichaceae bacterium 6_1_45 genomic scaffold supercont1.1, whole genome shotgun sequence. [Erysipelotrichaceae bacterium 6_1_45]	1457366	3795	16979		uncultured_Caudovirales_phage(12.5%)	20	NA	NA
Erysipelotrichaceae_Eubacterium_cylindroides_T2-87	FP929041	FP929041 Eubacterium cylindroides T2-87 draft genome. [Erysipelotrichaceae [Eubacterium] cylindroides T2-87]	1966750	118806	126029		Staphylococcus_phage(50.0%)	7	NA	NA
Erysipelotrichaceae_Eubacterium_cylindroides_T2-87	FP929041	FP929041 Eubacterium cylindroides T2-87 draft genome. [Erysipelotrichaceae [Eubacterium] cylindroides T2-87]	1966750	603318	611465		Lactobacillus_phage(33.33%)	11	NA	NA
Erysipelotrichaceae_Eubacterium_cylindroides_T2-87	FP929041	FP929041 Eubacterium cylindroides T2-87 draft genome. [Erysipelotrichaceae [Eubacterium] cylindroides T2-87]	1966750	1003983	1011393	protease,tRNA	uncultured_Mediterranean_phage(16.67%)	7	NA	NA
Erysipelotrichaceae_Eubacterium_cylindroides_T2-87	FP929041	FP929041 Eubacterium cylindroides T2-87 draft genome. [Erysipelotrichaceae [Eubacterium] cylindroides T2-87]	1966750	1280976	1288095		uncultured_Mediterranean_phage(28.57%)	8	NA	NA
Bifidobacterium_longum_subsp._infantis_ATCC_15697_=_JCM_1222_=_DSM_20088	AP010889	AP010889 Bifidobacterium longum subsp. infantis JCM 1222 DNA, complete genome. [Bifidobacterium longum subsp. infantis ATCC 15697 = JCM 1222 = DSM 20088]	2828958	1296426	1309223		Bifidobacterium_phage(63.64%)	16	NA	NA
Bifidobacterium_longum_subsp._infantis_ATCC_15697_=_JCM_1222_=_DSM_20088	AP010889	AP010889 Bifidobacterium longum subsp. infantis JCM 1222 DNA, complete genome. [Bifidobacterium longum subsp. infantis ATCC 15697 = JCM 1222 = DSM 20088]	2828958	1974017	1985891		Propionibacterium_phage(25.0%)	15	NA	NA
Bifidobacterium_longum_subsp._infantis_ATCC_15697_=_JCM_1222_=_DSM_20088	AP010889	AP010889 Bifidobacterium longum subsp. infantis JCM 1222 DNA, complete genome. [Bifidobacterium longum subsp. infantis ATCC 15697 = JCM 1222 = DSM 20088]	2828958	2796740	2806517		Mycobacterium_phage(33.33%)	9	NA	NA
Helicobacter_pylori_GAM210Bi	KB642848	KB642848 Helicobacter pylori GAM210Bi genomic scaffold Scfld26, whole genome shotgun sequence. [Helicobacter pylori GAM210Bi]	5418	842	5343		Escherichia_phage(100.0%)	7	NA	NA
Helicobacter_pylori_GAM210Bi	KB642856	KB642856 Helicobacter pylori GAM210Bi genomic scaffold Scfld4, whole genome shotgun sequence. [Helicobacter pylori GAM210Bi]	61852	45796	55804	tRNA	Streptococcus_phage(42.86%)	9	NA	NA
Leuconostoc_mesenteroides_subsp._cremoris_ATCC_19254	GG693386	GG693386 Leuconostoc mesenteroides subsp. cremoris ATCC 19254 genomic scaffold SCAFFOLD4, whole genome shotgun sequence. [Leuconostoc mesenteroides subsp. cremoris ATCC 19254]	120607	47133	62993		Lactococcus_phage(40.0%)	21	NA	NA
Leuconostoc_mesenteroides_subsp._cremoris_ATCC_19254	GG693384	GG693384 Leuconostoc mesenteroides subsp. cremoris ATCC 19254 genomic scaffold SCAFFOLD2, whole genome shotgun sequence. [Leuconostoc mesenteroides subsp. cremoris ATCC 19254]	513909	232745	246091		Bacillus_phage(37.5%)	13	NA	NA
Leuconostoc_mesenteroides_subsp._cremoris_ATCC_19254	GG693384	GG693384 Leuconostoc mesenteroides subsp. cremoris ATCC 19254 genomic scaffold SCAFFOLD2, whole genome shotgun sequence. [Leuconostoc mesenteroides subsp. cremoris ATCC 19254]	513909	362908	371227	tRNA	Lactobacillus_phage(28.57%)	9	NA	NA
Leuconostoc_mesenteroides_subsp._cremoris_ATCC_19254	GG693387	GG693387 Leuconostoc mesenteroides subsp. cremoris ATCC 19254 genomic scaffold SCAFFOLD5, whole genome shotgun sequence. [Leuconostoc mesenteroides subsp. cremoris ATCC 19254]	234424	81184	91874	protease	Pandoravirus(14.29%)	12	NA	NA
Leuconostoc_mesenteroides_subsp._cremoris_ATCC_19254	GG693390	GG693390 Leuconostoc mesenteroides subsp. cremoris ATCC 19254 genomic scaffold SCAFFOLD8, whole genome shotgun sequence. [Leuconostoc mesenteroides subsp. cremoris ATCC 19254]	54184	34360	43282	transposase	Escherichia_phage(28.57%)	10	NA	NA
Leuconostoc_mesenteroides_subsp._cremoris_ATCC_19254	GG693383	GG693383 Leuconostoc mesenteroides subsp. cremoris ATCC 19254 genomic scaffold SCAFFOLD1, whole genome shotgun sequence. [Leuconostoc mesenteroides subsp. cremoris ATCC 19254]	543364	194766	198073		Leuconostoc_phage(100.0%)	6	NA	NA
Leuconostoc_mesenteroides_subsp._cremoris_ATCC_19254	GG693383	GG693383 Leuconostoc mesenteroides subsp. cremoris ATCC 19254 genomic scaffold SCAFFOLD1, whole genome shotgun sequence. [Leuconostoc mesenteroides subsp. cremoris ATCC 19254]	543364	210674	248940	protease	Leuconostoc_phage(37.14%)	67	NA	NA
Leuconostoc_mesenteroides_subsp._cremoris_ATCC_19254	GG693383	GG693383 Leuconostoc mesenteroides subsp. cremoris ATCC 19254 genomic scaffold SCAFFOLD1, whole genome shotgun sequence. [Leuconostoc mesenteroides subsp. cremoris ATCC 19254]	543364	258042	278915		Lactococcus_phage(31.25%)	24	NA	NA
Bacteroides_coprocola_DSM_17136	DS981430	DS981430 Bacteroides coprocola DSM 17136 Scfld_02_3 genomic scaffold, whole genome shotgun sequence. [Bacteroides coprocola DSM 17136]	92375	37732	47489		Croceibacter_phage(28.57%)	13	NA	NA
Bacteroides_coprocola_DSM_17136	DS981457	DS981457 Bacteroides coprocola DSM 17136 Scfld_02_30 genomic scaffold, whole genome shotgun sequence. [Bacteroides coprocola DSM 17136]	281116	154634	161193		Pneumococcus_phage(33.33%)	7	NA	NA
Bacteroides_coprocola_DSM_17136	DS981507	DS981507 Bacteroides coprocola DSM 17136 Scfld_02_80 genomic scaffold, whole genome shotgun sequence. [Bacteroides coprocola DSM 17136]	109182	76173	89053	protease	unidentified_phage(57.14%)	13	NA	NA
Ruminiclostridium_Eubacterium_siraeum_DSM_15702	DS499534	DS499534 Eubacterium siraeum DSM 15702 Scfld_03_26 genomic scaffold, whole genome shotgun sequence. [Ruminiclostridium [Eubacterium] siraeum DSM 15702]	54497	16863	35126		Lactobacillus_phage(30.77%)	25	NA	NA
Ruminiclostridium_Eubacterium_siraeum_DSM_15702	DS499550	DS499550 Eubacterium siraeum DSM 15702 Scfld_03_42 genomic scaffold, whole genome shotgun sequence. [Ruminiclostridium [Eubacterium] siraeum DSM 15702]	148092	73182	81101		Mollivirus(33.33%)	8	NA	NA
Ruminiclostridium_Eubacterium_siraeum_DSM_15702	DS499550	DS499550 Eubacterium siraeum DSM 15702 Scfld_03_42 genomic scaffold, whole genome shotgun sequence. [Ruminiclostridium [Eubacterium] siraeum DSM 15702]	148092	112075	119332	tRNA	Leptospira_phage(33.33%)	8	NA	NA
Ruminiclostridium_Eubacterium_siraeum_DSM_15702	DS499548	DS499548 Eubacterium siraeum DSM 15702 Scfld_03_40 genomic scaffold, whole genome shotgun sequence. [Ruminiclostridium [Eubacterium] siraeum DSM 15702]	128485	95462	102259	tRNA	Clostridium_virus(33.33%)	6	NA	NA
Helicobacter_cinaedi_CCUG_18818	DS990392	DS990392 Helicobacter cinaedi CCUG 18818 supercont2.2 genomic scaffold, whole genome shotgun sequence. [Helicobacter cinaedi CCUG 18818]	705796	205643	212117		Sulfolobus_monocaudavirus(28.57%)	11	NA	NA
Clostridium_celatum_DSM_1785	KB291611	KB291611 Clostridium celatum DSM 1785 genomic scaffold Scfld15, whole genome shotgun sequence. [Clostridium celatum DSM 1785]	11757	3156	11712		Acinetobacter_phage(100.0%)	8	NA	NA
Clostridium_celatum_DSM_1785	KB291645	KB291645 Clostridium celatum DSM 1785 genomic scaffold Scfld77, whole genome shotgun sequence. [Clostridium celatum DSM 1785]	193105	29931	36001		Clostridium_phage(83.33%)	8	NA	NA
Clostridium_celatum_DSM_1785	KB291618	KB291618 Clostridium celatum DSM 1785 genomic scaffold Scfld25, whole genome shotgun sequence. [Clostridium celatum DSM 1785]	163573	8031	45929	protease	Streptococcus_phage(27.78%)	48	NA	NA
Clostridium_celatum_DSM_1785	KB291681	KB291681 Clostridium celatum DSM 1785 genomic scaffold Scfld153, whole genome shotgun sequence. [Clostridium celatum DSM 1785]	121231	60233	119975		Clostridium_phage(34.78%)	92	NA	NA
Clostridium_celatum_DSM_1785	KB291649	KB291649 Clostridium celatum DSM 1785 genomic scaffold Scfld81, whole genome shotgun sequence. [Clostridium celatum DSM 1785]	140620	55636	66356		Cyanophage(25.0%)	8	NA	NA
Oxalobacter_formigenes_HOxBLS	KI392031	KI392031 Oxalobacter formigenes HOxBLS genomic scaffold supercont2.2, whole genome shotgun sequence. [Oxalobacter formigenes HOxBLS]	1806203	568016	576240		Vibrio_phage(33.33%)	8	NA	NA
Oxalobacter_formigenes_HOxBLS	KI392031	KI392031 Oxalobacter formigenes HOxBLS genomic scaffold supercont2.2, whole genome shotgun sequence. [Oxalobacter formigenes HOxBLS]	1806203	821470	830813		Burkholderia_virus(25.0%)	11	NA	NA
Oxalobacter_formigenes_HOxBLS	KI392031	KI392031 Oxalobacter formigenes HOxBLS genomic scaffold supercont2.2, whole genome shotgun sequence. [Oxalobacter formigenes HOxBLS]	1806203	859148	865773		Burkholderia_phage(33.33%)	10	NA	NA
Oxalobacter_formigenes_HOxBLS	KI392031	KI392031 Oxalobacter formigenes HOxBLS genomic scaffold supercont2.2, whole genome shotgun sequence. [Oxalobacter formigenes HOxBLS]	1806203	873780	901119		Bordetella_phage(88.89%)	26	NA	NA
Oxalobacter_formigenes_HOxBLS	KI392031	KI392031 Oxalobacter formigenes HOxBLS genomic scaffold supercont2.2, whole genome shotgun sequence. [Oxalobacter formigenes HOxBLS]	1806203	904652	914090		Bordetella_phage(57.14%)	10	NA	NA
Oxalobacter_formigenes_HOxBLS	KI392031	KI392031 Oxalobacter formigenes HOxBLS genomic scaffold supercont2.2, whole genome shotgun sequence. [Oxalobacter formigenes HOxBLS]	1806203	1318998	1330260	tRNA	Klosneuvirus(28.57%)	8	NA	NA
Oxalobacter_formigenes_HOxBLS	KI392031	KI392031 Oxalobacter formigenes HOxBLS genomic scaffold supercont2.2, whole genome shotgun sequence. [Oxalobacter formigenes HOxBLS]	1806203	1373438	1395209	tail	Burkholderia_phage(46.15%)	28	NA	NA
Oxalobacter_formigenes_HOxBLS	KI392031	KI392031 Oxalobacter formigenes HOxBLS genomic scaffold supercont2.2, whole genome shotgun sequence. [Oxalobacter formigenes HOxBLS]	1806203	1398507	1430758		Burkholderia_phage(20.59%)	41	NA	NA
Oxalobacter_formigenes_HOxBLS	KI392031	KI392031 Oxalobacter formigenes HOxBLS genomic scaffold supercont2.2, whole genome shotgun sequence. [Oxalobacter formigenes HOxBLS]	1806203	1452884	1462248	protease	Streptococcus_phage(16.67%)	9	NA	NA
Oxalobacter_formigenes_HOxBLS	KI392031	KI392031 Oxalobacter formigenes HOxBLS genomic scaffold supercont2.2, whole genome shotgun sequence. [Oxalobacter formigenes HOxBLS]	1806203	1641132	1653058		Shigella_phage(25.0%)	11	NA	NA
Oxalobacter_formigenes_HOxBLS	KI392030	KI392030 Oxalobacter formigenes HOxBLS genomic scaffold supercont2.1, whole genome shotgun sequence. [Oxalobacter formigenes HOxBLS]	682183	585881	594007	protease	uncultured_Mediterranean_phage(28.57%)	9	NA	NA
Oxalobacter_formigenes_HOxBLS	KI392030	KI392030 Oxalobacter formigenes HOxBLS genomic scaffold supercont2.1, whole genome shotgun sequence. [Oxalobacter formigenes HOxBLS]	682183	624851	632495		Lake_Baikal_phage(33.33%)	12	NA	NA
Escherichia_coli_MS_85-1	ADWQ01000038	ADWQ01000038 Escherichia coli MS 85-1 E_coliMS85-1-1.0.1_Cont37.1, whole genome shotgun sequence. [Escherichia coli MS 85-1]	24101	8552	22270		Enterobacteria_phage(60.0%)	21	NA	NA
Escherichia_coli_MS_85-1	ADWQ01000005	ADWQ01000005 Escherichia coli MS 85-1 E_coliMS85-1-1.0.1_Cont4.1, whole genome shotgun sequence. [Escherichia coli MS 85-1]	246090	149641	155938		Escherichia_phage(50.0%)	6	NA	NA
Escherichia_coli_MS_85-1	ADWQ01000005	ADWQ01000005 Escherichia coli MS 85-1 E_coliMS85-1-1.0.1_Cont4.1, whole genome shotgun sequence. [Escherichia coli MS 85-1]	246090	175083	184952	tRNA	Mycoplasma_phage(14.29%)	12	NA	NA
Escherichia_coli_MS_85-1	ADWQ01000054	ADWQ01000054 Escherichia coli MS 85-1 E_coliMS85-1-1.0.1_Cont53.1, whole genome shotgun sequence. [Escherichia coli MS 85-1]	14784	387	14485		Escherichia_phage(56.25%)	19	NA	NA
Escherichia_coli_MS_85-1	ADWQ01000026	ADWQ01000026 Escherichia coli MS 85-1 E_coliMS85-1-1.0.1_Cont25.1, whole genome shotgun sequence. [Escherichia coli MS 85-1]	45005	18122	43835		Enterobacteria_phage(35.29%)	34	NA	NA
Escherichia_coli_MS_85-1	ADWQ01000001	ADWQ01000001 Escherichia coli MS 85-1 E_coliMS85-1-1.0.1_Cont0.1, whole genome shotgun sequence. [Escherichia coli MS 85-1]	433260	68423	115125		Enterobacteria_phage(28.12%)	70	NA	NA
Escherichia_coli_MS_85-1	ADWQ01000001	ADWQ01000001 Escherichia coli MS 85-1 E_coliMS85-1-1.0.1_Cont0.1, whole genome shotgun sequence. [Escherichia coli MS 85-1]	433260	193928	226776	tail	Salmonella_phage(86.84%)	44	NA	NA
Escherichia_coli_MS_85-1	ADWQ01000001	ADWQ01000001 Escherichia coli MS 85-1 E_coliMS85-1-1.0.1_Cont0.1, whole genome shotgun sequence. [Escherichia coli MS 85-1]	433260	257988	267949	tRNA,protease	Dickeya_phage(16.67%)	8	NA	NA
Escherichia_coli_MS_85-1	ADWQ01000030	ADWQ01000030 Escherichia coli MS 85-1 E_coliMS85-1-1.0.1_Cont29.1, whole genome shotgun sequence. [Escherichia coli MS 85-1]	42364	448	8301		Staphylococcus_phage(16.67%)	9	NA	NA
Escherichia_coli_MS_85-1	ADWQ01000077	ADWQ01000077 Escherichia coli MS 85-1 E_coliMS85-1-1.0.1_Cont76.1, whole genome shotgun sequence. [Escherichia coli MS 85-1]	6508	44	5578		Enterobacteria_phage(71.43%)	7	NA	NA
Escherichia_coli_MS_85-1	ADWQ01000023	ADWQ01000023 Escherichia coli MS 85-1 E_coliMS85-1-1.0.1_Cont22.1, whole genome shotgun sequence. [Escherichia coli MS 85-1]	75476	63774	75046	transposase	Salmonella_phage(28.57%)	9	NA	NA
Escherichia_coli_MS_85-1	ADWQ01000006	ADWQ01000006 Escherichia coli MS 85-1 E_coliMS85-1-1.0.1_Cont5.1, whole genome shotgun sequence. [Escherichia coli MS 85-1]	240140	236742	240063		Stx2-converting_phage(42.86%)	7	NA	NA
Escherichia_coli_MS_85-1	ADWQ01000060	ADWQ01000060 Escherichia coli MS 85-1 E_coliMS85-1-1.0.1_Cont59.1, whole genome shotgun sequence. [Escherichia coli MS 85-1]	11321	422	8521		Enterobacteria_phage(33.33%)	13	NA	NA
Escherichia_coli_MS_85-1	ADWQ01000002	ADWQ01000002 Escherichia coli MS 85-1 E_coliMS85-1-1.0.1_Cont1.1, whole genome shotgun sequence. [Escherichia coli MS 85-1]	393837	256649	267468		Sodalis_phage(14.29%)	11	NA	NA
Escherichia_coli_MS_85-1	ADWQ01000010	ADWQ01000010 Escherichia coli MS 85-1 E_coliMS85-1-1.0.1_Cont9.1, whole genome shotgun sequence. [Escherichia coli MS 85-1]	170974	68859	78300		Enterobacteria_phage(75.0%)	10	NA	NA
[truncated: 680 more rows]

## Sheet: Table S4
Supplenmentary Table S4 The predicted prophages and related information of 400 HMP bacterial genome using Phage_Finder
[truncated: 581 more rows]

## Sheet: Table S5
Supplenmentary Table S5 The predicted prophages and related information of 400 HMP bacterial genome using VirSorter
[truncated: 3,017 more rows]
